# Supplementary material for: Changes In And Asymmetry of The Proteome In The Human Foetal Frontal Lobe During Early Development
Source: Research Square preprint supplement (doi:10.21203/rs.3.rs-1230789/v1), 2022-02-09
Supplement: Supplementary file 3 [file 3b28e64371cfe772d5ce962e.xlsx]

## Sheet: S1.coreproteinsGO
ONTOLOGY	ID	Description	GeneRatio	BgRatio	pvalue	p.adjust	qvalue	geneID	Count
GO:0006402	BP	GO:0006402	mRNA catabolic process	180/1773	375/18862	1.8866e-85	1.0382e-81	7.68543e-82	80153/131870/4849/6169/28960/26058/10767/22894/9513/5394/6138/5711/5721/11224/5683/5714/11157/6229/10605/5713/5716/10197/207/4686/9567/8087/80349/6164/10921/51441/8021/2935/22803/23367/6168/84305/9698/5690/10658/1153/9491/79068/2107/5720/6157/10213/23644/6144/6209/9045/8241/9939/5976/27258/6137/6128/6141/5710/23019/5695/25804/6160/5684/6143/6234/6232/6210/7812/6165/8148/50804/57819/5704/5702/3646…	180
GO:0006401	BP	GO:0006401	RNA catabolic process	189/1773	414/18862	4.90448e-85	1.34947e-81	9.98965e-82	80153/131870/54888/4849/6169/28960/26058/10767/22894/81892/8882/9513/5394/6138/5711/79621/84153/1736/5721/11224/5683/5714/11157/6229/10605/5713/5716/10197/207/4686/9567/8087/80349/6164/10921/51441/8021/2935/22803/23367/6168/84305/9698/5690/10658/1153/9491/79068/23517/2107/5720/6157/10213/23644/6144/6209/9045/8241/9939/5976/27258/6137/6128/6141/5710/23019/5695/25804/6160/5684/6143/6234/6232/6210/7…	189
GO:0008380	BP	GO:0008380	RNA splicing	191/1773	481/18862	2.5464e-73	4.67094e-70	3.45774e-70	55692/9406/8896/10656/4857/28960/51340/5434/8882/23350/84687/9129/55677/9589/9513/5432/23398/22938/26121/29894/10286/6430/10250/79869/6635/51729/9295/27336/53938/6830/11157/5430/389677/57187/84844/9128/125950/6631/8189/2962/10659/7072/5437/51692/26528/4686/5356/8087/10921/51747/284695/10137/5411/6637/84991/1993/79084/10212/6627/81608/9092/151987/25929/10285/8175/10658/10713/1153/23028/1478/23517/…	191
GO:0000375	BP	GO:0000375	RNA splicing, via transesterification reactions	165/1773	386/18862	7.41114e-69	1.01959e-65	7.54767e-66	55692/8896/10656/4857/28960/51340/5434/23350/9129/9589/9513/5432/23398/22938/26121/29894/10286/6430/10250/79869/6635/51729/9295/27336/53938/11157/5430/84844/9128/125950/6631/8189/2962/10659/7072/5437/51692/26528/4686/5356/8087/10921/51747/5411/6637/84991/1993/79084/10212/6627/81608/9092/25929/10285/8175/10658/10713/1153/23028/1478/23517/9416/51639/5936/6636/10419/11325/51691/6638/9879/58517/22826…	165
GO:0000377	BP	GO:0000377	RNA splicing, via transesterification reactions with bulged adenosine as nucleophile	164/1773	383/18862	1.43499e-68	1.31612e-65	9.74283e-66	55692/8896/10656/4857/28960/51340/5434/23350/9129/9589/9513/5432/23398/22938/26121/29894/10286/6430/10250/79869/6635/51729/9295/27336/53938/11157/5430/84844/9128/125950/6631/8189/2962/10659/7072/5437/51692/26528/4686/5356/8087/10921/51747/5411/6637/84991/1993/79084/10212/6627/81608/9092/25929/10285/8175/10658/10713/1153/23028/1478/23517/9416/51639/5936/6636/10419/11325/51691/6638/9879/58517/22826…	164
GO:0000398	BP	GO:0000398	mRNA splicing, via spliceosome	164/1773	383/18862	1.43499e-68	1.31612e-65	9.74283e-66	55692/8896/10656/4857/28960/51340/5434/23350/9129/9589/9513/5432/23398/22938/26121/29894/10286/6430/10250/79869/6635/51729/9295/27336/53938/11157/5430/84844/9128/125950/6631/8189/2962/10659/7072/5437/51692/26528/4686/5356/8087/10921/51747/5411/6637/84991/1993/79084/10212/6627/81608/9092/25929/10285/8175/10658/10713/1153/23028/1478/23517/9416/51639/5936/6636/10419/11325/51691/6638/9879/58517/22826…	164
GO:0019080	BP	GO:0019080	viral gene expression	113/1773	198/18862	4.2258e-64	3.32208e-61	2.45922e-61	23279/6169/7469/28985/5434/25920/5432/51497/6138/22938/23165/3065/348995/23636/11224/55746/81929/5430/6229/79902/4927/2962/5437/8665/6164/51773/8021/28972/6168/9631/8480/64710/6157/23225/8562/6598/6144/6829/6209/9045/6137/6128/6141/5431/6160/8662/8666/6396/6143/6234/9688/51386/6232/6210/6597/7812/6165/8664/5702/6230/23521/6158/6139/6228/6224/6204/23435/6194/6134/6152/6217/6203/6142/6231/6155/8661…	113
GO:0006413	BP	GO:0006413	translational initiation	110/1773	193/18862	2.50298e-62	1.72174e-59	1.27454e-59	8891/8893/6169/9669/28985/6138/11224/5610/6229/10605/1967/8665/4686/6164/51441/10987/1982/23367/10959/6168/1983/6157/5936/1965/8562/10480/6059/6144/8667/3692/6209/9045/6137/6128/6141/6160/8662/8666/6143/6234/8669/8894/27335/51386/6232/6210/1974/7812/6165/8664/7458/3646/6230/8668/23521/1975/6158/6139/6228/6224/6204/8663/6194/6134/6152/1981/6217/1968/6203/6142/6231/6155/5499/8661/6201/6227/7175/473…	110
GO:0019083	BP	GO:0019083	viral transcription	100/1773	180/18862	2.8291e-55	1.72984e-52	1.28054e-52	23279/6169/7469/5434/25920/5432/51497/6138/22938/23165/3065/348995/23636/11224/55746/81929/5430/6229/79902/4927/2962/5437/6164/51773/8021/6168/9631/8480/64710/6157/23225/6598/6144/6829/6209/9045/6137/6128/6141/5431/6160/6396/6143/6234/9688/6232/6210/6597/6165/5702/6230/23521/6158/6139/6228/6224/6204/23435/6194/6134/6152/6217/6203/6142/6231/6155/6201/6227/7175/4736/6218/6156/6135/6193/6222/6207/61…	100
GO:1903311	BP	GO:1903311	regulation of mRNA metabolic process	136/1773	334/18862	1.20587e-53	6.63589e-51	4.91233e-51	10656/4857/26058/79577/54623/22894/55677/9589/9513/79811/9667/22938/5711/79869/5721/5683/5714/6830/10605/5713/5716/10659/7072/10197/26528/207/4686/9567/8087/10921/51441/8021/23367/9698/5690/10658/1153/9491/79068/5720/10213/5936/6829/58517/6651/9444/8241/9939/5976/5710/23019/5695/11052/55234/10284/708/5684/11051/6626/6431/8148/50804/5704/5702/9861/3842/5694/5706/5718/5691/4858/5700/8683/5692/10643…	136
GO:0072599	BP	GO:0072599	establishment of protein localization to endoplasmic reticulum	80/1773	124/18862	1.78634e-51	8.93655e-49	6.61543e-49	6169/22930/6138/23480/11224/439/6229/25782/9789/6164/6729/28972/6168/6157/6731/6144/6209/9045/10952/6137/6128/6141/10890/6160/6143/6234/6232/6210/6165/6449/6730/6727/6230/23521/6158/6139/6228/6224/6204/6194/6134/6152/6217/6203/6142/6231/6155/6201/6227/4736/6726/6218/6156/6135/6193/6222/6207/6133/6189/6147/6206/6122/6132/6202/9349/6205/6136/6223/6129/6124/6125/6187/6208/6130/6175/3921/6181/6188/33…	80
GO:0000184	BP	GO:0000184	nuclear-transcribed mRNA catabolic process, nonsense-mediated decay	78/1773	120/18862	1.40088e-50	6.42418e-48	4.7556e-48	6169/5394/6138/11224/6229/4686/6164/10921/2935/6168/84305/2107/6157/6144/6209/9045/9939/5976/6137/6128/6141/6160/6143/6234/6232/6210/6165/3646/6230/23521/6158/6139/6228/6224/6204/6194/6134/6152/1981/6217/5515/6203/6142/6231/6155/6201/6227/4736/6218/6156/6135/6193/6222/6207/6133/6189/6147/6206/6122/9775/6132/6202/9349/6205/6136/6223/6129/6124/6125/6187/6208/6130/6175/3921/5518/6181/6188/6233	78
GO:0045047	BP	GO:0045047	protein targeting to ER	77/1773	120/18862	2.55951e-49	1.08346e-46	8.02049e-47	6169/6138/23480/11224/439/6229/9789/6164/6729/28972/6168/6157/6731/6144/6209/9045/10952/6137/6128/6141/6160/6143/6234/6232/6210/6165/6449/6730/6727/6230/23521/6158/6139/6228/6224/6204/6194/6134/6152/6217/6203/6142/6231/6155/6201/6227/4736/6726/6218/6156/6135/6193/6222/6207/6133/6189/6147/6206/6122/6132/6202/9349/6205/6136/6223/6129/6124/6125/6187/6208/6130/6175/3921/6181/6188/3309/6233	77
GO:0006614	BP	GO:0006614	SRP-dependent cotranslational protein targeting to membrane	71/1773	105/18862	6.07854e-48	2.3893e-45	1.76872e-45	6169/6138/11224/6229/6164/6729/6168/6157/6731/6144/6209/9045/10952/6137/6128/6141/6160/6143/6234/6232/6210/6165/6730/6727/6230/23521/6158/6139/6228/6224/6204/6194/6134/6152/6217/6203/6142/6231/6155/6201/6227/4736/6726/6218/6156/6135/6193/6222/6207/6133/6189/6147/6206/6122/6132/6202/9349/6205/6136/6223/6129/6124/6125/6187/6208/6130/6175/3921/6181/6188/6233	71
GO:0006613	BP	GO:0006613	cotranslational protein targeting to membrane	71/1773	110/18862	8.08905e-46	2.9676e-43	2.19681e-43	6169/6138/11224/6229/6164/6729/6168/6157/6731/6144/6209/9045/10952/6137/6128/6141/6160/6143/6234/6232/6210/6165/6730/6727/6230/23521/6158/6139/6228/6224/6204/6194/6134/6152/6217/6203/6142/6231/6155/6201/6227/4736/6726/6218/6156/6135/6193/6222/6207/6133/6189/6147/6206/6122/6132/6202/9349/6205/6136/6223/6129/6124/6125/6187/6208/6130/6175/3921/6181/6188/6233	71
GO:0070972	BP	GO:0070972	protein localization to endoplasmic reticulum	83/1773	152/18862	3.12278e-45	1.07404e-42	7.95075e-43	6169/22930/6138/23480/11224/439/6229/25782/10134/9789/6164/6729/28972/6168/6157/6731/6144/6209/9045/10952/6137/6128/6141/10890/6160/6143/6234/6232/6210/6165/6449/6730/6727/6230/23521/6158/6139/6228/6224/6204/6194/6134/6152/6217/6203/6142/6231/6155/6201/6227/9218/4736/6726/6218/6156/6135/6193/6222/6207/6133/6189/6147/6206/6122/6132/6202/9349/6205/6136/6223/6129/6124/6125/6187/6208/6130/6175/3921/5…	83
GO:0022613	BP	GO:0022613	ribonucleoprotein complex biogenesis	151/1773	473/18862	7.92711e-44	2.56605e-41	1.89956e-41	131870/55692/8450/6169/79631/57418/51340/22907/28985/79577/22894/9129/5394/55759/55651/8886/4839/55226/26121/6430/79869/9188/2752/1736/6635/51729/11224/11157/6229/8451/5303/55623/27043/2091/26156/4927/6631/10659/51119/8665/4686/51747/6637/79084/22803/9092/25929/8175/10658/10713/23517/1983/9416/51602/6636/8562/10419/10480/6059/8667/103/3692/6209/9045/6128/9733/11052/25804/8662/8666/708/6234/8669/4…	151
GO:0000956	BP	GO:0000956	nuclear-transcribed mRNA catabolic process	96/1773	208/18862	9.17279e-44	2.80433e-41	2.07595e-41	80153/4849/6169/28960/10767/22894/5394/6138/11224/11157/6229/4686/80349/6164/10921/2935/22803/6168/84305/2107/6157/23644/6144/6209/9045/9939/5976/27258/6137/6128/6141/23019/25804/6160/6143/6234/6232/6210/7812/6165/57819/3646/6230/23521/9967/6158/6139/6228/6224/6204/6194/6134/6152/1981/6217/5515/1656/6203/6142/6231/6155/6201/6227/4736/6218/6156/6135/6193/6222/6207/6133/6189/6147/6206/6122/1655/977…	96
GO:0071826	BP	GO:0071826	ribonucleoprotein complex subunit organization	99/1773	231/18862	1.43976e-41	4.17e-39	3.08691e-39	55692/6169/51340/22907/28985/79577/9129/4839/26121/6430/79869/6635/6631/10659/8665/4686/51747/6637/79084/9092/25929/8175/10658/10713/1983/9416/6636/8562/10419/10480/8667/103/3692/6209/6128/9733/11052/25804/8662/8666/6234/8669/8894/27335/51386/11051/6232/6431/8664/7458/57819/3646/8668/23521/1975/51631/8683/7536/6204/10728/8663/6134/6152/10946/22827/6634/1968/6632/10291/8607/8661/3799/11171/11168/1…	99
GO:0022618	BP	GO:0022618	ribonucleoprotein complex assembly	97/1773	224/18862	3.19944e-41	8.80326e-39	6.51676e-39	55692/6169/51340/22907/28985/79577/9129/4839/26121/6430/79869/6635/6631/10659/8665/4686/51747/6637/79084/9092/25929/8175/10658/10713/1983/9416/6636/8562/10419/10480/8667/103/3692/6209/6128/9733/11052/25804/8662/8666/6234/8669/8894/27335/51386/11051/6232/6431/8664/7458/57819/3646/8668/23521/1975/51631/8683/7536/6204/10728/8663/6134/6152/10946/22827/6634/1968/6632/10291/8607/8661/11171/11168/10856/…	97
GO:0043488	BP	GO:0043488	regulation of mRNA stability	85/1773	188/18862	5.28619e-38	1.38523e-35	1.02544e-35	26058/22894/9513/5711/5721/5683/5714/10605/5713/5716/10197/207/8087/51441/8021/23367/9698/5690/10658/1153/9491/79068/5720/10213/8241/5976/5710/5695/5684/8148/50804/5704/5702/9861/3842/5694/5706/5718/5691/5700/5692/10643/9967/5709/5705/23435/5685/5719/1996/1981/5689/10644/5686/23589/5707/5682/5717/5688/5693/5687/7514/1994/5708/5701/328/6418/26135/10949/8125/10492/2521/3315/7529/8570/3184/10236/166…	85
GO:0043487	BP	GO:0043487	regulation of RNA stability	87/1773	198/18862	1.12519e-37	2.81451e-35	2.08349e-35	54888/26058/22894/9513/5711/1736/5721/5683/5714/10605/5713/5716/10197/207/8087/51441/8021/23367/9698/5690/10658/1153/9491/79068/5720/10213/8241/5976/5710/5695/5684/8148/50804/5704/5702/9861/3842/5694/5706/5718/5691/5700/5692/10643/9967/5709/5705/23435/5685/5719/1996/1981/5689/10644/5686/23589/5707/5682/5717/5688/5693/5687/7514/1994/5708/5701/328/6418/26135/10949/8125/10492/2521/3315/7529/8570/318…	87
GO:0090150	BP	GO:0090150	establishment of protein localization to membrane	118/1773	354/18862	2.11406e-36	5.05812e-34	3.74436e-34	1020/9747/6169/22930/51079/55750/56850/8266/60412/51024/4836/25813/4218/6138/6386/23480/581/11224/439/6229/5058/7917/56993/112755/25782/6164/6729/481/6168/6616/6157/6731/6144/6209/9045/10952/6137/6128/6141/10890/6160/6143/6234/6232/6210/4905/6165/10434/6449/6730/9868/6727/9141/6230/23521/6158/6139/6228/6224/6204/6194/6134/6152/6217/6203/6142/6231/6155/55737/4301/6201/6227/4736/6726/6218/6156/6135…	118
GO:0061013	BP	GO:0061013	regulation of mRNA catabolic process	87/1773	210/18862	2.84324e-35	6.51932e-33	4.82603e-33	26058/22894/9513/5711/5721/5683/5714/10605/5713/5716/10197/207/9567/8087/51441/8021/23367/9698/5690/10658/1153/9491/79068/5720/10213/8241/5976/5710/23019/5695/5684/8148/50804/5704/5702/9861/3842/5694/5706/5718/5691/5700/5692/10643/9967/5709/5705/23435/5685/5719/1996/1981/5689/10644/5686/23589/5707/5682/5717/5688/5693/5687/7514/1994/5708/5701/328/6418/26135/10949/8125/10492/2521/3315/7529/8570/318…	87
GO:0002478	BP	GO:0002478	antigen processing and presentation of exogenous peptide antigen	79/1773	177/18862	6.6473e-35	1.4632e-32	1.08316e-32	6456/1175/55860/3685/5711/5721/8907/5683/5714/5713/5716/10197/11258/64837/10120/5690/9491/164/51143/5720/10213/162/1211/9632/1785/5710/5695/22872/140735/1173/6396/5684/1783/10484/51164/5704/5702/9861/5694/5706/5718/160/5691/161/5700/9554/5692/5709/5705/5685/5719/1509/5689/1781/5686/830/5707/5682/6712/5717/8655/5688/5693/5687/5708/5701/10121/7879/829/163/832/375/10540/1639/821/2923/811/1213/1778	79
GO:0051169	BP	GO:0051169	nuclear transport	113/1773	343/18862	2.35543e-34	4.98537e-32	3.6905e-32	1020/54888/23279/26953/5571/11260/26060/8882/57506/55677/29894/23165/6430/10250/55198/348995/6635/9295/23636/23534/55746/81929/6830/79902/57187/84248/10482/4927/8189/51692/207/4686/10921/57510/6637/8021/10212/81608/25929/9631/3839/8480/4659/10204/5781/3836/5936/23225/6636/8498/6059/3692/10541/6209/9939/5976/7307/3840/2010/5905/11052/51569/6396/84271/9688/23039/2932/3838/6431/3842/8683/5594/6432/2…	113
GO:0019884	BP	GO:0019884	antigen processing and presentation of exogenous antigen	80/1773	185/18862	4.00673e-34	8.16632e-32	6.04525e-32	6456/1175/55860/3685/5711/5721/8907/5683/5714/8943/5713/5716/10197/11258/64837/10120/5690/9491/164/51143/5720/10213/162/1211/9632/1785/5710/5695/22872/140735/1173/6396/5684/1783/10484/51164/5704/5702/9861/5694/5706/5718/160/5691/161/5700/9554/5692/5709/5705/5685/5719/1509/5689/1781/5686/830/5707/5682/6712/5717/8655/5688/5693/5687/5708/5701/10121/7879/829/163/832/375/10540/1639/821/2923/811/1213/1…	80
GO:0006913	BP	GO:0006913	nucleocytoplasmic transport	111/1773	340/18862	2.34807e-33	4.6148e-31	3.41618e-31	1020/54888/23279/26953/5571/11260/26060/8882/57506/55677/29894/23165/6430/10250/55198/348995/6635/9295/23636/23534/55746/81929/6830/79902/57187/84248/10482/4927/8189/51692/207/4686/10921/57510/6637/8021/10212/81608/25929/9631/3839/8480/4659/10204/5781/3836/5936/23225/6636/8498/6059/3692/10541/6209/9939/5976/7307/3840/2010/5905/11052/51569/6396/84271/9688/23039/2932/3838/6431/3842/8683/5594/6432/2…	111
GO:0006605	BP	GO:0006605	protein targeting	129/1773	441/18862	3.85726e-33	7.31949e-31	5.41837e-31	1020/9747/51100/6169/51/51079/55750/10455/30/60412/51024/25813/2931/6138/54332/9512/6386/23480/11224/439/10452/9049/8943/6229/5058/950/4924/6342/10469/56993/8540/92609/1459/10134/9789/6164/847/6729/28972/6168/9131/9146/6157/6731/7332/1191/6144/6209/9045/10952/6137/6128/1891/6141/3295/6160/6143/6234/6232/6210/6165/6449/6730/9868/6727/11140/293/9141/6230/23521/6158/6139/6228/6224/6204/6194/6134/615…	129
GO:0006403	BP	GO:0006403	RNA localization	89/1773	234/18862	1.22364e-32	2.24457e-30	1.66158e-30	25909/54888/23279/11260/55677/5394/55651/29894/23165/6430/10250/348995/1736/9295/23636/55746/81929/6830/79902/57187/84248/2091/10482/4927/8189/51692/4686/10921/57510/10211/8021/10212/81608/9631/8480/10204/51602/23225/6059/3692/9444/9908/6209/9939/5976/7307/11052/6396/84271/9688/51637/6431/8683/10643/6432/26097/6428/10644/10128/9793/11338/8607/10189/7175/84324/7514/6427/10856/9775/24148/6741/7919/…	89
GO:0048002	BP	GO:0048002	antigen processing and presentation of peptide antigen	80/1773	194/18862	2.36498e-32	4.19823e-30	3.10781e-30	6456/1175/55860/3685/5711/5721/8907/5683/5714/5713/5716/10197/10134/11258/64837/10120/5690/9491/164/51143/5720/10213/162/1211/9632/1785/5710/5695/22872/140735/1173/6396/5684/1783/10484/51164/5704/5702/9861/5694/5706/5718/160/5691/161/5700/9554/5692/5709/5705/5685/5719/1509/5689/1781/5686/830/5707/5682/6712/5717/8655/5688/5693/5687/5708/5701/10121/7879/829/163/832/375/10540/1639/821/2923/811/1213/…	80
GO:0002181	BP	GO:0002181	cytoplasmic translation	57/1773	102/18862	3.71313e-32	6.38543e-30	4.72692e-30	8891/6169/28985/6138/8665/51441/4733/2935/51372/2107/1983/5936/8562/10480/8667/6128/6141/6160/8662/8666/6143/6234/8669/8894/27335/51386/1974/6165/8664/7458/3646/8668/23521/1975/6139/6228/8663/6152/1981/7555/1968/6142/6231/8661/6227/4736/6156/6135/6133/6132/6175/3921/1973/6181/1660/1938/5315	57
GO:0006520	BP	GO:0006520	cellular amino acid metabolic process	107/1773	331/18862	9.19713e-32	1.53369e-29	1.13534e-29	586/80755/60496/26275/7915/58478/18/8604/5711/2752/5721/5683/5714/64122/5713/5716/5832/4204/56474/10197/4357/1719/22929/7453/4507/4329/5184/63826/833/5690/642/1743/56267/9491/5720/5859/2937/10213/8565/56954/4967/5471/5710/1738/5695/4141/10056/5684/8833/2805/2193/9255/1503/80150/3376/5198/2617/5860/5704/5702/9861/5694/5706/5718/5691/5700/5692/875/102724560/6472/5709/5917/51520/3735/5705/5685/5719/…	107
GO:0006612	BP	GO:0006612	protein targeting to membrane	82/1773	211/18862	6.15055e-31	9.95485e-29	7.36924e-29	1020/9747/6169/60412/51024/6138/6386/23480/11224/439/6229/5058/6164/6729/6168/6157/6731/6144/6209/9045/10952/6137/6128/6141/6160/6143/6234/6232/6210/6165/6449/6730/6727/6230/23521/6158/6139/6228/6224/6204/6194/6134/6152/6217/6203/6142/6231/6155/6201/6227/4736/6726/6218/6156/6135/6193/6222/6207/6133/6189/6147/6206/6122/6132/6202/9349/6205/6136/6223/6129/6124/6125/6187/6208/6130/6175/3921/6181/6188…	82
GO:0006611	BP	GO:0006611	protein export from nucleus	73/1773	183/18862	1.59565e-28	2.50882e-26	1.8572e-26	1020/54888/23279/11260/55677/29894/23165/6430/10250/348995/9295/23636/55746/81929/6830/79902/57187/84248/10482/4927/8189/51692/4686/10921/57510/8021/10212/81608/9631/8480/10204/5781/23225/8498/6059/3692/10541/6209/9939/5976/7307/2010/5905/6396/84271/9688/23039/2932/6431/8683/6432/26097/6428/11338/10189/7175/84324/7514/6427/9775/6741/7295/1434/7919/3313/6426/1984/11315/811/4869/5901/3181/7531	73
GO:0019882	BP	GO:0019882	antigen processing and presentation	83/1773	234/18862	5.00345e-28	7.64832e-26	5.66179e-26	6456/1175/55860/3685/5711/5721/8907/5683/5714/8943/5713/5716/5869/10197/10134/11258/64837/10120/5690/9491/164/51143/5720/10213/162/1211/9632/1785/5710/5695/10890/22872/140735/1173/6396/5684/1783/10484/51164/5704/5702/9861/5694/5706/5718/160/5691/161/5700/9554/5692/5709/5705/5685/5719/1509/5689/1781/5686/830/5707/5682/6712/5717/8655/5688/5693/5687/5708/5701/10121/7879/829/163/832/375/10540/1639/82…	83
GO:0051168	BP	GO:0051168	nuclear export	76/1773	201/18862	7.64868e-28	1.13759e-25	8.42117e-26	1020/54888/23279/11260/55677/29894/23165/6430/10250/348995/9295/23636/55746/81929/6830/79902/57187/84248/10482/4927/8189/51692/4686/10921/57510/8021/10212/81608/9631/8480/10204/5781/23225/8498/6059/3692/10541/6209/9939/5976/7307/2010/5905/11052/6396/84271/9688/23039/2932/6431/8683/6432/26097/6428/11338/10189/7175/84324/7514/6427/9775/6741/7295/1434/7919/3313/6426/1984/11315/3178/811/1660/4869/590…	76
GO:0050657	BP	GO:0050657	nucleic acid transport	74/1773	198/18862	9.08201e-27	1.28149e-24	9.48647e-25	25909/54888/23279/11260/55677/29894/23165/6430/10250/348995/9295/23636/55746/81929/6830/79902/57187/84248/10482/4927/8189/51692/4686/10921/57510/10211/8021/10212/81608/9631/8480/10204/23225/6059/3692/9444/9908/6209/9939/5976/7307/11052/6396/84271/9688/51637/6431/8683/10643/6432/26097/6428/10644/10128/9793/11338/10189/7175/84324/7514/6427/9775/6741/7919/6426/1984/8570/6421/3178/1660/4869/5901/3192…	74
GO:0050658	BP	GO:0050658	RNA transport	74/1773	198/18862	9.08201e-27	1.28149e-24	9.48647e-25	25909/54888/23279/11260/55677/29894/23165/6430/10250/348995/9295/23636/55746/81929/6830/79902/57187/84248/10482/4927/8189/51692/4686/10921/57510/10211/8021/10212/81608/9631/8480/10204/23225/6059/3692/9444/9908/6209/9939/5976/7307/11052/6396/84271/9688/51637/6431/8683/10643/6432/26097/6428/10644/10128/9793/11338/10189/7175/84324/7514/6427/9775/6741/7919/6426/1984/8570/6421/3178/1660/4869/5901/3192…	74
GO:0006457	BP	GO:0006457	protein folding	81/1773	233/18862	1.06332e-26	1.46286e-24	1.08291e-24	7841/22824/23770/1676/9526/5203/51726/134492/53938/9049/9761/23071/23184/23640/80331/1459/2773/26973/10598/7266/10471/10294/1191/3301/1457/7411/3337/51645/1460/5201/6904/5202/5204/51035/10131/10961/6449/11140/56886/9141/5700/6625/2280/10728/54331/3336/10549/10726/6902/2775/2783/10856/23193/2288/10808/5589/5479/821/22948/10130/3313/5034/9601/6767/10574/10575/3315/6950/7203/10576/2923/7415/7184/332…	81
GO:0043484	BP	GO:0043484	regulation of RNA splicing	62/1773	145/18862	2.15814e-26	2.89665e-24	2.14429e-24	10656/4857/8882/9589/9513/22938/6430/5430/389677/10659/7072/26528/4686/8087/10921/284695/10137/10658/1153/5936/92906/58517/6651/9444/8241/9939/3188/55234/10284/708/6431/4858/8683/6625/9967/7536/6432/6434/22827/6428/6231/11338/3185/58155/6207/1655/9588/3189/27339/5725/2521/79026/4691/3178/10521/3191/3187/3303/3192/3190/3181/3312	62
GO:0051236	BP	GO:0051236	establishment of RNA localization	74/1773	201/18862	2.74097e-26	3.59133e-24	2.65854e-24	25909/54888/23279/11260/55677/29894/23165/6430/10250/348995/9295/23636/55746/81929/6830/79902/57187/84248/10482/4927/8189/51692/4686/10921/57510/10211/8021/10212/81608/9631/8480/10204/23225/6059/3692/9444/9908/6209/9939/5976/7307/11052/6396/84271/9688/51637/6431/8683/10643/6432/26097/6428/10644/10128/9793/11338/10189/7175/84324/7514/6427/9775/6741/7919/6426/1984/8570/6421/3178/1660/4869/5901/3192…	74
GO:0006405	BP	GO:0006405	RNA export from nucleus	61/1773	142/18862	4.03494e-26	5.16378e-24	3.82257e-24	54888/23279/11260/55677/29894/23165/6430/10250/348995/9295/23636/55746/81929/6830/79902/57187/84248/10482/4927/8189/51692/4686/10921/57510/8021/10212/81608/9631/8480/23225/6059/3692/6209/9939/5976/7307/11052/6396/84271/9688/6431/8683/6432/26097/6428/11338/10189/7175/84324/7514/6427/9775/6741/7919/6426/1984/3178/1660/4869/5901/3181	61
GO:0046034	BP	GO:0046034	ATP metabolic process	95/1773	313/18862	5.65802e-26	7.07638e-24	5.23841e-24	23279/126328/5571/4709/4728/51079/54205/27089/4704/4723/51024/4698/8604/2584/5214/23165/4706/4712/1345/4702/348995/23636/1537/55746/4705/81929/4724/283209/8473/79902/10165/28964/55967/4729/4927/204/8021/481/4720/9631/8480/23225/9377/4697/4722/3692/30968/4967/1340/1738/7381/6396/10632/9688/10059/6389/11164/203/4513/230/523/526/29789/509/10476/522/6472/1329/4719/7386/4436/1327/539/515/7175/5236/521…	95
GO:0071166	BP	GO:0071166	ribonucleoprotein complex localization	58/1773	131/18862	9.90272e-26	1.21099e-23	8.96456e-24	54888/23279/11260/55677/26121/29894/23165/6430/10250/348995/9295/23636/55746/81929/6830/79902/57187/84248/10482/4927/8189/51692/4686/10921/8021/10212/81608/9631/8480/23225/6059/3692/6209/9939/5976/7307/6396/84271/9688/6431/8683/6432/26097/6428/11338/10189/7175/84324/7514/6427/9775/6741/7919/6426/1984/4869/5901/3181	58
GO:1902036	BP	GO:1902036	regulation of hematopoietic stem cell differentiation	43/1773	74/18862	1.578e-25	1.88777e-23	1.39745e-23	5711/5721/5683/54940/132299/5714/5610/5713/5716/10197/51441/5690/9491/5720/10213/5710/5695/5684/5704/5702/9861/5694/5706/5718/5691/5700/5692/5709/5705/5685/5719/5689/5686/5707/5682/5717/5688/5693/5687/5708/5701/3313/5591	43
GO:0071426	BP	GO:0071426	ribonucleoprotein complex export from nucleus	57/1773	130/18862	4.7981e-25	5.61786e-23	4.15871e-23	54888/23279/11260/55677/29894/23165/6430/10250/348995/9295/23636/55746/81929/6830/79902/57187/84248/10482/4927/8189/51692/4686/10921/8021/10212/81608/9631/8480/23225/6059/3692/6209/9939/5976/7307/6396/84271/9688/6431/8683/6432/26097/6428/11338/10189/7175/84324/7514/6427/9775/6741/7919/6426/1984/4869/5901/3181	57
GO:0043312	BP	GO:0043312	neutrophil degranulation	122/1773	485/18862	8.39004e-25	9.61884e-23	7.1205e-23	51382/28956/3163/178/25801/8566/23385/6836/30/55860/4860/23593/3685/79888/1508/1729/23114/23197/6386/8907/5683/823/9761/23071/8836/5713/23191/80331/5869/847/9798/6616/23352/10788/2495/10120/51143/10213/10092/55276/6993/56954/327/81567/5049/4048/1460/5695/10890/4282/5660/11333/28988/1727/22931/23406/230/10493/5702/6727/9861/5718/161/5709/51552/5594/10857/5719/5878/1509/1476/5689/9522/5686/1315/100…	122
GO:0002283	BP	GO:0002283	neutrophil activation involved in immune response	122/1773	488/18862	1.50769e-24	1.69323e-22	1.25344e-22	51382/28956/3163/178/25801/8566/23385/6836/30/55860/4860/23593/3685/79888/1508/1729/23114/23197/6386/8907/5683/823/9761/23071/8836/5713/23191/80331/5869/847/9798/6616/23352/10788/2495/10120/51143/10213/10092/55276/6993/56954/327/81567/5049/4048/1460/5695/10890/4282/5660/11333/28988/1727/22931/23406/230/10493/5702/6727/9861/5718/161/5709/51552/5594/10857/5719/5878/1509/1476/5689/9522/5686/1315/100…	122
GO:0060218	BP	GO:0060218	hematopoietic stem cell differentiation	46/1773	88/18862	1.56571e-24	1.72322e-22	1.27564e-22	23376/5711/5721/5683/54940/132299/5714/5610/5713/5716/10197/51441/5690/9491/5720/10213/5710/5695/5684/5704/5702/9861/5694/5706/5718/5691/5700/5692/5709/5705/5685/5719/5689/5686/5707/5682/5717/5688/6422/5693/5687/5708/5701/7520/3313/5591	46
GO:0002446	BP	GO:0002446	neutrophil mediated immunity	123/1773	499/18862	3.69864e-24	3.9909e-22	2.95433e-22	51382/28956/3163/178/25801/8566/23385/6836/30/55860/4860/23593/3685/79888/1508/1729/23114/23197/6386/8907/5683/823/9761/23071/8836/5713/23191/80331/5869/847/9798/6616/23352/10788/2495/10120/51143/10213/10092/55276/6993/56954/327/81567/5049/4048/1460/5695/10890/4282/5660/11333/28988/1727/22931/23406/230/10493/5702/6727/9861/5718/161/5709/51552/5594/10857/5719/5878/1509/1476/5689/9522/5686/1315/100…	123
GO:0050684	BP	GO:0050684	regulation of mRNA processing	58/1773	139/18862	4.08313e-24	4.32105e-22	3.19873e-22	10656/4857/79577/54623/55677/9589/9513/79811/9667/22938/79869/6830/10659/7072/26528/4686/8087/10921/10658/1153/5936/6829/58517/6651/9444/8241/9939/11052/55234/10284/708/11051/6626/6431/4858/8683/6625/9967/7536/6432/6434/22827/6428/11338/6294/1655/9588/27339/5725/4691/3178/10521/1660/3191/3192/3190/3181/3312	58
GO:0006521	BP	GO:0006521	regulation of cellular amino acid metabolic process	38/1773	62/18862	6.72105e-24	6.97848e-22	5.16593e-22	5711/5721/5683/5714/5713/5716/10197/5690/9491/5720/10213/5710/5695/5684/5704/5702/9861/5694/5706/5718/5691/5700/5692/5709/5705/5685/5719/5689/5686/5707/5682/5717/5688/5693/5687/5708/5701/11315	38
GO:0042119	BP	GO:0042119	neutrophil activation	122/1773	500/18862	1.4794e-23	1.50761e-21	1.11604e-21	51382/28956/3163/178/25801/8566/23385/6836/30/55860/4860/23593/3685/79888/1508/1729/23114/23197/6386/8907/5683/823/9761/23071/8836/5713/23191/80331/5869/847/9798/6616/23352/10788/2495/10120/51143/10213/10092/55276/6993/56954/327/81567/5049/4048/1460/5695/10890/4282/5660/11333/28988/1727/22931/23406/230/10493/5702/6727/9861/5718/161/5709/51552/5594/10857/5719/5878/1509/1476/5689/9522/5686/1315/100…	122
GO:0051028	BP	GO:0051028	mRNA transport	60/1773	152/18862	2.17268e-23	2.17386e-21	1.60924e-21	25909/54888/23279/55677/29894/23165/6430/10250/348995/9295/23636/55746/81929/6830/79902/57187/84248/10482/4927/8189/51692/4686/10921/8021/10212/81608/9631/8480/10204/23225/9444/9908/9939/5976/7307/6396/84271/9688/6431/8683/10643/6432/26097/6428/10644/10128/11338/10189/7175/84324/7514/6427/9775/7919/6426/1984/8570/3178/1660/3181	60
GO:0002479	BP	GO:0002479	antigen processing and presentation of exogenous peptide antigen via MHC class I, TAP-dependent	41/1773	75/18862	5.3057e-23	5.21379e-21	3.85959e-21	3685/5711/5721/5683/5714/5713/5716/10197/5690/9491/5720/10213/5710/5695/5684/5704/5702/9861/5694/5706/5718/5691/5700/9554/5692/5709/5705/5685/5719/5689/5686/5707/5682/5717/5688/5693/5687/5708/5701/2923/811	41
GO:0002474	BP	GO:0002474	antigen processing and presentation of peptide antigen via MHC class I	47/1773	99/18862	1.0455e-22	1.00937e-20	7.47201e-21	3685/5711/5721/5683/5714/5713/5716/10197/10134/5690/9491/5720/10213/9632/5710/5695/22872/6396/5684/10484/5704/5702/9861/5694/5706/5718/5691/5700/9554/5692/5709/5705/5685/5719/5689/5686/5707/5682/5717/5688/5693/5687/5708/5701/821/2923/811	47
GO:0060071	BP	GO:0060071	Wnt signaling pathway, planar cell polarity pathway	49/1773	108/18862	1.5977e-22	1.51589e-20	1.12216e-20	1175/10082/5711/5721/5683/57216/5714/5713/5716/10197/5690/9491/5720/10213/5710/5695/1173/5684/5704/5702/9861/5694/5706/5718/160/5691/161/5700/5692/5709/5705/5685/5719/5689/5686/5879/5707/5682/5717/5688/6422/5693/387/5687/5708/5701/163/2239/1213	49
GO:0061418	BP	GO:0061418	regulation of transcription from RNA polymerase II promoter in response to hypoxia	41/1773	77/18862	2.04147e-22	1.90411e-20	1.40955e-20	5711/5721/5683/8453/5714/5713/5716/10197/5690/9491/5720/10213/6923/5710/5695/5684/5704/5702/9861/5694/6921/5706/5718/5691/5700/5692/5709/5705/5685/5719/5689/5686/5707/5682/5717/5688/5693/5687/5708/5701/6233	41
GO:0010389	BP	GO:0010389	regulation of G2/M transition of mitotic cell cycle	69/1773	203/18862	2.73865e-22	2.5118e-20	1.8594e-20	10142/95681/5711/5721/5683/5714/7283/5713/5716/8454/4204/10197/4361/25942/11258/5577/23332/5690/9491/8883/5720/10213/5710/5695/5684/55031/5704/5702/9861/5694/5706/5718/5691/5700/5692/5709/2273/5705/5685/5719/10382/5689/1781/6500/9793/5686/5707/5682/5717/8655/5688/5693/5687/55920/5708/5701/10121/22919/10540/5048/1639/8091/5518/3320/7532/1778/203068/10383/7531	69
GO:1901532	BP	GO:1901532	regulation of hematopoietic progenitor cell differentiation	44/1773	89/18862	3.02763e-22	2.73132e-20	2.0219e-20	5711/5721/5683/54940/132299/5714/5610/5713/5716/10197/51441/5690/9491/5720/10213/5710/5695/5684/11051/5704/5702/9861/5694/5706/5718/5691/5700/5692/5709/5705/5685/5719/5689/5686/5707/5682/5717/5688/5693/5687/5708/5701/3313/5591	44
GO:0002183	BP	GO:0002183	cytoplasmic translational initiation	27/1773	34/18862	4.38624e-22	3.89315e-20	2.88196e-20	8891/28985/8665/51441/1983/5936/8562/10480/8667/8662/8666/8669/8894/27335/51386/1974/8664/7458/3646/8668/23521/1975/8663/1981/1968/8661/1973	27
GO:0031503	BP	GO:0031503	protein-containing complex localization	83/1773	283/18862	9.19377e-22	8.03069e-20	5.94485e-20	54888/23279/11260/56850/26052/55677/10082/4218/51668/29894/23165/6430/10250/348995/9295/23636/55746/81929/6830/10243/8943/79902/57187/84248/112755/10482/4927/8189/51692/4686/10921/8021/10212/81608/6616/9631/3092/8480/8417/23225/6059/3692/6209/1785/9939/5976/7307/140735/6396/84271/9688/83658/6431/3842/8683/6432/26097/6428/55737/11338/10189/3799/8655/7175/403/84324/7514/55920/6427/163/9775/2239/674…	83
GO:0090175	BP	GO:0090175	regulation of establishment of planar polarity	49/1773	112/18862	1.14315e-21	9.67804e-20	7.16433e-20	1175/10082/5711/5721/5683/57216/5714/5713/5716/10197/5690/9491/5720/10213/5710/5695/1173/5684/5704/5702/9861/5694/5706/5718/160/5691/161/5700/5692/5709/5705/5685/5719/5689/5686/5879/5707/5682/5717/5688/6422/5693/387/5687/5708/5701/163/2239/1213	49
GO:2000736	BP	GO:2000736	regulation of stem cell differentiation	49/1773	112/18862	1.14315e-21	9.67804e-20	7.16433e-20	54888/25920/5711/5721/5683/54940/132299/5714/5610/5713/5716/10197/51441/5690/9491/6660/5720/10213/5710/5695/5764/5684/11051/5704/5702/9861/5694/5706/5718/5691/5700/5692/5709/5705/5685/5719/5689/5686/5707/5682/5717/5688/5693/5687/5708/5701/3313/5591/3192	49
GO:0042590	BP	GO:0042590	antigen processing and presentation of exogenous peptide antigen via MHC class I	41/1773	80/18862	1.38392e-21	1.1539e-19	8.54191e-20	3685/5711/5721/5683/5714/5713/5716/10197/5690/9491/5720/10213/5710/5695/5684/5704/5702/9861/5694/5706/5718/5691/5700/9554/5692/5709/5705/5685/5719/5689/5686/5707/5682/5717/5688/5693/5687/5708/5701/2923/811	41
GO:1902749	BP	GO:1902749	regulation of cell cycle G2/M phase transition	71/1773	219/18862	1.52429e-21	1.25196e-19	9.26787e-20	10142/95681/5711/5721/5683/5714/7283/5713/5716/8454/4204/10197/4361/25942/11258/5577/23332/5690/9491/8883/5720/10213/5710/5695/5684/55031/5704/5702/9861/5694/5706/5718/5691/5700/5692/5709/2273/5705/5685/5719/10382/5689/1781/6500/9793/5686/5707/5682/5717/8655/5688/5693/5687/55920/5708/5701/10121/22919/10540/5048/1639/9555/8091/5518/3320/4869/7532/1778/203068/10383/7531	71
GO:0006406	BP	GO:0006406	mRNA export from nucleus	49/1773	113/18862	1.83702e-21	1.46509e-19	1.08456e-19	54888/23279/55677/29894/23165/6430/10250/348995/9295/23636/55746/81929/6830/79902/57187/84248/10482/4927/8189/51692/4686/10921/8021/10212/81608/9631/8480/23225/9939/5976/7307/6396/84271/9688/6431/8683/6432/26097/6428/11338/10189/7175/84324/6427/9775/7919/6426/1984/3181	49
GO:0071427	BP	GO:0071427	mRNA-containing ribonucleoprotein complex export from nucleus	49/1773	113/18862	1.83702e-21	1.46509e-19	1.08456e-19	54888/23279/55677/29894/23165/6430/10250/348995/9295/23636/55746/81929/6830/79902/57187/84248/10482/4927/8189/51692/4686/10921/8021/10212/81608/9631/8480/23225/9939/5976/7307/6396/84271/9688/6431/8683/6432/26097/6428/11338/10189/7175/84324/6427/9775/7919/6426/1984/3181	49
GO:0000086	BP	GO:0000086	G2/M transition of mitotic cell cycle	78/1773	258/18862	2.02283e-21	1.59023e-19	1.17719e-19	10142/95681/5711/23236/5721/5683/5714/7283/5713/51400/5716/8454/4204/10197/4361/25942/11258/5577/23332/5690/9491/8883/4659/5720/10213/1785/5500/5710/5695/5684/55031/2029/5704/5702/9861/5694/5706/5718/5691/5700/5692/5709/2273/5705/5685/5719/10382/5689/1781/6500/9793/5686/5707/5682/5717/8655/5688/5693/5687/55920/5708/5701/10121/22919/10540/5048/1639/8091/5518/3320/7532/1778/801/808/203068/10763/103…	78
GO:0015931	BP	GO:0015931	nucleobase-containing compound transport	77/1773	253/18862	2.33583e-21	1.81043e-19	1.3402e-19	25909/54888/23279/11260/55677/29894/23165/6430/10250/348995/29957/9295/23636/55746/81929/6830/79902/57187/84248/10482/4927/8189/51692/4686/10921/57510/10211/8021/10212/81608/9631/8480/10204/23225/6059/3692/9444/9908/6209/9939/5976/7307/11052/6396/84271/9688/51637/6431/293/8683/10643/6432/26097/6428/10644/10128/9793/11338/10189/7175/84324/7514/6427/292/9775/6741/7919/6426/1984/8570/6421/3178/1660/…	77
GO:1902903	BP	GO:1902903	regulation of supramolecular fiber organization	97/1773	370/18862	2.62763e-21	2.00831e-19	1.48669e-19	58497/10142/5921/57175/57482/10013/22924/5203/4130/55201/5058/2314/23191/2876/2909/4204/4089/2885/10391/1073/11344/50810/5756/23122/382/4733/10093/10094/822/10788/81553/23332/29767/10471/23580/9181/55704/10092/10152/1191/7411/2764/120/5201/7082/119/6904/5202/1496/5204/28988/26999/11151/23406/136319/10552/5962/51571/2017/10109/10787/10382/5217/9793/830/10097/5879/6712/6422/387/4137/11034/118/10096…	97
GO:0045333	BP	GO:0045333	cellular respiration	64/1773	187/18862	5.98862e-21	4.51444e-19	3.34188e-19	126328/4709/4728/51079/54205/27089/4704/4723/4698/8604/4706/4712/1345/4702/1537/6390/4705/4724/79751/10165/8801/55967/4729/55847/847/4720/1743/48/8802/1737/2109/9377/4697/4722/4200/4967/1340/1738/7381/5160/8803/5162/6389/2108/10131/4513/2820/2271/1431/6472/1329/4719/23530/7386/1327/7384/50/7385/3417/3418/4190/4191/11315/7415	64
GO:0002218	BP	GO:0002218	activation of innate immune response	56/1773	148/18862	7.10849e-21	5.28622e-19	3.91321e-19	57506/85364/5711/5721/5683/5714/5058/5713/5716/8454/10197/25942/5690/9491/5720/10213/5710/5695/5684/5567/5704/5702/9868/9861/5694/5706/5718/5691/5700/5692/5709/5705/5685/5719/5689/6500/5686/5707/5682/5717/55269/5688/5693/5687/10432/5708/5701/5062/7520/6421/2547/9782/3320/5591/4841/3146	56
GO:0044839	BP	GO:0044839	cell cycle G2/M phase transition	80/1773	276/18862	1.13807e-20	8.35041e-19	6.18153e-19	10142/95681/5711/23236/5721/5683/5714/7283/5713/51400/5716/8454/4204/10197/4361/25942/11258/5577/23332/5690/9491/8883/4659/5720/10213/1785/5500/5710/5695/5684/55031/2029/5704/5702/9861/5694/5706/5718/5691/5700/5692/5709/2273/5705/5685/5719/10382/5689/1781/6500/9793/5686/5707/5682/5717/8655/5688/5693/5687/55920/5708/5701/10121/22919/10540/5048/1639/9555/8091/5518/3320/4869/7532/1778/801/808/203068…	80
GO:0048024	BP	GO:0048024	regulation of mRNA splicing, via spliceosome	45/1773	100/18862	1.28445e-20	9.3004e-19	6.88477e-19	10656/4857/9589/9513/22938/10659/7072/26528/4686/8087/10921/10658/1153/5936/58517/6651/9444/8241/9939/55234/10284/708/6431/4858/8683/6625/9967/7536/6432/6434/22827/6428/11338/1655/9588/27339/5725/4691/3178/10521/3191/3192/3190/3181/3312	45
GO:0051258	BP	GO:0051258	protein polymerization	83/1773	294/18862	1.35803e-20	9.7055e-19	7.18465e-19	58497/10142/5921/57175/26052/57482/1729/22924/7283/5058/2314/23191/4976/4204/2885/2879/11344/50810/5756/23122/382/4733/10093/10094/822/10788/81553/23332/29767/23580/79585/10092/10152/1785/3093/2764/120/119/7756/6904/1496/10059/28988/26999/11151/2244/23406/136319/10552/5962/51571/2017/10109/10787/10382/5217/9793/2266/830/10097/5879/6712/4137/118/10096/829/2288/7417/11075/832/22919/375/1639/6188/67…	83
GO:0001736	BP	GO:0001736	establishment of planar polarity	50/1773	123/18862	2.23077e-20	1.55392e-18	1.15031e-18	1175/10082/5711/5721/5683/57216/5714/5713/5716/10197/5690/9491/5720/10213/5710/5695/1173/5684/5704/5702/9861/5694/5706/5718/160/5691/161/5700/5692/5709/5705/5685/5719/5689/5686/5879/5707/5682/5717/5688/6422/5693/387/5687/5708/5701/9948/163/2239/1213	50
GO:0007164	BP	GO:0007164	establishment of tissue polarity	50/1773	123/18862	2.23077e-20	1.55392e-18	1.15031e-18	1175/10082/5711/5721/5683/57216/5714/5713/5716/10197/5690/9491/5720/10213/5710/5695/1173/5684/5704/5702/9861/5694/5706/5718/160/5691/161/5700/5692/5709/5705/5685/5719/5689/5686/5879/5707/5682/5717/5688/6422/5693/387/5687/5708/5701/9948/163/2239/1213	50
GO:0033238	BP	GO:0033238	regulation of cellular amine metabolic process	39/1773	77/18862	2.32836e-20	1.60162e-18	1.18563e-18	5711/5721/5683/5714/5713/5716/3251/10197/5690/9491/5720/10213/5710/5695/5684/5704/5702/9861/5694/5706/5718/5691/5700/5692/5709/5705/5685/5719/5689/5686/5707/5682/5717/5688/5693/5687/5708/5701/11315	39
GO:0031146	BP	GO:0031146	SCF-dependent proteasomal ubiquitin-dependent protein catabolic process	43/1773	93/18862	2.49533e-20	1.69528e-18	1.25496e-18	8450/5711/8065/5721/5683/8453/5714/8451/5713/5716/8454/10197/5690/9491/5720/10213/5710/5695/5684/5704/5702/9861/5694/5706/5718/5691/5700/5692/5709/5705/5685/5719/5689/6500/5686/5707/5682/5717/5688/5693/5687/5708/5701	43
GO:0015980	BP	GO:0015980	energy derivation by oxidation of organic compounds	79/1773	278/18862	7.50825e-20	5.03877e-18	3.73003e-18	126328/4709/178/4728/51079/54205/27089/4704/4723/10580/4698/2931/8604/4706/4712/1345/4702/1537/6390/4705/4724/283209/79751/10165/8801/55967/4729/207/55847/9852/847/4720/1743/48/8802/1737/2109/55276/9377/4697/4722/4200/5500/4967/1340/1738/7381/5160/8803/5162/2778/6389/2932/2108/10131/7360/4513/2820/2271/1431/6472/1329/4719/23530/7386/1327/5499/5236/7384/50/7385/3417/3418/4190/4191/11315/7415/801/3…	79
GO:0031145	BP	GO:0031145	anaphase-promoting complex-dependent catabolic process	40/1773	83/18862	7.87732e-20	5.22276e-18	3.86623e-18	5711/5721/5683/5714/5713/5716/10197/5690/9491/5720/10213/5710/8452/5695/5684/5704/5702/9861/5694/5706/5718/5691/5700/5692/5709/5705/5685/5719/5689/5686/5707/5682/5717/5688/5693/5687/5708/5701/9184/6233	40
GO:0010972	BP	GO:0010972	negative regulation of G2/M transition of mitotic cell cycle	44/1773	100/18862	1.02264e-19	6.69951e-18	4.95942e-18	5711/5721/5683/5714/5713/5716/8454/10197/4361/5690/9491/8883/5720/10213/5710/5695/5684/55031/5704/5702/9861/5694/5706/5718/5691/5700/5692/5709/2273/5705/5685/5719/5689/6500/5686/5707/5682/5717/5688/5693/5687/5708/5701/8091	44
GO:0043254	BP	GO:0043254	regulation of protein-containing complex assembly	106/1773	446/18862	1.09945e-19	7.11798e-18	5.2692e-18	51100/8450/58497/10142/5921/57175/57482/10013/22924/581/63908/5610/5058/2314/8451/23191/7037/112755/4204/2885/11344/5756/7453/382/4733/10093/10094/822/10788/81553/23332/29767/23580/5781/10092/10152/1191/2764/120/6119/119/6904/1496/79969/28988/2932/6812/26999/11151/23406/5704/136319/5702/5706/10552/5962/23521/51571/2017/10109/10787/5705/1981/10382/5217/9793/830/8775/10097/5879/6118/6712/1854/4137/…	106
GO:0043618	BP	GO:0043618	regulation of transcription from RNA polymerase II promoter in response to stress	46/1773	109/18862	1.19633e-19	7.65513e-18	5.66683e-18	5711/5721/5683/8453/5714/5713/5716/10197/25942/5690/9491/5720/10213/3337/6923/5710/5695/10985/5684/5704/5702/9861/5694/6921/5706/5718/5691/5700/5692/5709/5705/5685/5719/5689/5686/5707/5682/5717/5688/5693/5687/5708/5701/3309/3303/6233	46
GO:0019693	BP	GO:0019693	ribose phosphate metabolic process	104/1773	435/18862	1.55395e-19	9.8292e-18	7.27622e-18	131870/79966/23279/5571/79631/79877/84532/9061/4597/23597/51727/8604/2584/5214/79621/23165/5636/55229/348995/11165/23636/7372/10380/55746/81929/283209/8473/79902/10165/28964/4976/158/8801/6576/4927/3251/56474/204/9567/2539/2773/8021/8573/51144/9631/9524/1743/8480/1737/23225/3692/30968/10654/4967/5471/3295/1738/5160/8803/5162/3094/6396/10632/8833/9688/1503/11164/5198/203/4513/230/523/509/10476/522…	104
GO:0032271	BP	GO:0032271	regulation of protein polymerization	69/1773	225/18862	1.789e-19	1.11873e-17	8.28161e-18	58497/10142/5921/57175/57482/22924/5058/2314/23191/4204/2885/11344/5756/382/4733/10093/10094/822/10788/81553/23332/29767/23580/10092/10152/2764/120/119/6904/1496/28988/26999/11151/23406/136319/10552/5962/51571/2017/10109/10787/10382/5217/9793/830/10097/5879/6712/4137/118/10096/829/2288/7417/11075/832/22919/375/1639/6188/6711/4926/3320/1627/3303/3304/4133/7114/4131	69
GO:0043620	BP	GO:0043620	regulation of DNA-templated transcription in response to stress	47/1773	115/18862	2.36331e-19	1.46127e-17	1.08173e-17	5711/5721/5683/8453/5714/5713/5716/10197/25942/5690/9491/5720/10213/3337/6923/5710/5695/10985/5684/5704/5702/9774/9861/5694/6921/5706/5718/5691/5700/5692/5709/5705/5685/5719/5689/5686/5707/5682/5717/5688/5693/5687/5708/5701/3309/3303/6233	47
GO:0001738	BP	GO:0001738	morphogenesis of a polarized epithelium	53/1773	144/18862	3.38617e-19	2.07045e-17	1.53269e-17	1175/10082/5711/5721/5683/57216/5714/5713/5716/10197/5690/9491/5720/10213/5710/5695/10890/1173/5684/5704/5702/9861/5694/5706/5718/160/5691/161/5700/5692/5709/5705/5685/5719/5689/5686/5879/5707/5682/5717/5688/6422/5693/387/5687/5708/5701/9948/163/4478/2239/1213/71	53
GO:0035722	BP	GO:0035722	interleukin-12-mediated signaling pathway	29/1773	47/18862	1.14015e-18	6.8948e-17	5.10399e-17	9446/23236/5721/552900/654483/9049/4507/5306/6627/6648/27250/4282/5898/6647/3185/829/4478/6888/5062/375/9987/3313/5034/302/6175/6950/4001/1072/3181	29
GO:0072521	BP	GO:0072521	purine-containing compound metabolic process	106/1773	460/18862	1.2341e-18	7.38178e-17	5.46448e-17	131870/79966/25939/23279/5571/79631/79877/84532/9061/4597/23597/4860/8604/2584/5214/23165/5636/55229/348995/11165/23636/10380/55746/81929/283209/8473/79902/10165/28964/2876/4976/158/8801/6576/4927/3251/204/9567/4521/2773/8021/4507/8573/51144/9631/9524/1743/8480/23028/1737/23225/3692/30968/10654/4967/5471/3295/1738/5160/8803/5162/3094/6396/10632/8833/9688/5198/203/4513/230/523/509/10476/522/6472/4…	106
GO:0035567	BP	GO:0035567	non-canonical Wnt signaling pathway	54/1773	153/18862	1.41554e-18	8.37604e-17	6.2005e-17	1175/5532/10082/5711/23236/5721/5683/57216/5714/5713/5716/10197/5690/9491/5720/10213/5710/5695/1173/5684/5704/5702/9861/5694/5706/5718/160/5691/161/5700/5692/5709/5705/5685/5719/5689/5686/5879/5707/5682/5717/5688/6422/54331/5693/387/5687/2775/5708/5701/163/2239/1213/801	54
GO:1902750	BP	GO:1902750	negative regulation of cell cycle G2/M phase transition	45/1773	111/18862	2.00963e-18	1.17649e-16	8.70915e-17	5711/5721/5683/5714/5713/5716/8454/10197/4361/5690/9491/8883/5720/10213/5710/5695/5684/55031/5704/5702/9861/5694/5706/5718/5691/5700/5692/5709/2273/5705/5685/5719/5689/6500/5686/5707/5682/5717/5688/5693/5687/5708/5701/9555/8091	45
GO:0006417	BP	GO:0006417	regulation of translation	100/1773	425/18862	2.6047e-18	1.49309e-16	1.10529e-16	60678/4849/8893/6169/9669/26058/9513/55226/5610/10605/23191/1967/7072/207/4686/1719/8087/51441/2935/1982/23367/10959/84305/9698/25929/10658/48/1153/79068/2107/1983/5936/1965/8667/149986/3692/9444/9939/5976/23654/23019/8662/10985/708/84271/27335/3673/1974/7812/10131/8664/7458/136319/3646/23521/1975/10643/6472/5594/8663/23435/6134/1981/10644/7555/1968/1656/10128/6203/5499/2058/7175/6726/84324/1994/…	100
GO:0009259	BP	GO:0009259	ribonucleotide metabolic process	100/1773	425/18862	2.6047e-18	1.49309e-16	1.10529e-16	131870/79966/23279/5571/79631/79877/84532/9061/4597/23597/51727/8604/2584/5214/79621/23165/55229/348995/11165/23636/7372/10380/55746/81929/283209/8473/79902/10165/28964/4976/158/8801/6576/4927/3251/56474/204/9567/2773/8021/8573/51144/9631/9524/1743/8480/1737/23225/3692/30968/10654/4967/5471/3295/1738/5160/8803/5162/3094/6396/10632/8833/9688/1503/5198/203/4513/230/523/509/10476/522/471/38/2618/539…	100
GO:0071349	BP	GO:0071349	cellular response to interleukin-12	29/1773	49/18862	5.85144e-18	3.31964e-16	2.45741e-16	9446/23236/5721/552900/654483/9049/4507/5306/6627/6648/27250/4282/5898/6647/3185/829/4478/6888/5062/375/9987/3313/5034/302/6175/6950/4001/1072/3181	29
GO:0060968	BP	GO:0060968	regulation of gene silencing	51/1773	144/18862	1.07699e-17	6.0476e-16	4.47683e-16	23279/10269/5605/5434/5432/23165/348995/23636/55746/81929/5430/79902/5604/4927/5437/8087/25942/57510/8021/9698/9631/8480/23225/103/3024/5431/6396/9688/1981/1656/7175/3005/1994/1655/8971/1660/3009/8294/8359/8360/8361/8362/8363/8364/8365/8366/8367/8368/8370/121504/554313	51
GO:0070671	BP	GO:0070671	response to interleukin-12	29/1773	50/18862	1.26865e-17	7.05189e-16	5.22027e-16	9446/23236/5721/552900/654483/9049/4507/5306/6627/6648/27250/4282/5898/6647/3185/829/4478/6888/5062/375/9987/3313/5034/302/6175/6950/4001/1072/3181	29
GO:0006163	BP	GO:0006163	purine nucleotide metabolic process	101/1773	441/18862	1.29528e-17	7.12792e-16	5.27656e-16	131870/79966/25939/23279/5571/79631/79877/84532/9061/4597/23597/4860/8604/2584/5214/23165/5636/55229/348995/11165/23636/10380/55746/81929/283209/8473/79902/10165/28964/2876/4976/158/8801/6576/4927/3251/204/9567/4521/2773/8021/8573/51144/9631/9524/1743/8480/1737/23225/3692/30968/10654/4967/5471/3295/1738/5160/8803/5162/3094/6396/10632/8833/9688/5198/203/4513/230/523/509/10476/522/471/38/2618/539/5…	101
GO:0070498	BP	GO:0070498	interleukin-1-mediated signaling pathway	42/1773	103/18862	2.12677e-17	1.15877e-15	8.57799e-16	5711/23236/5721/5683/5714/5713/5716/8454/10197/5690/9491/5720/10213/5710/5695/5684/5704/5702/9861/5694/5706/5718/5691/5700/5692/5709/5705/5685/5719/5689/6500/5686/5707/5682/5717/5688/5693/5687/5708/5701/7334/6233	42
GO:0034248	BP	GO:0034248	regulation of cellular amide metabolic process	108/1773	494/18862	3.33748e-17	1.8006e-15	1.33292e-15	60678/4849/8893/6169/9669/26058/10972/9513/2931/55226/5610/10605/23191/8301/1967/7072/207/4686/1719/8087/51441/2935/1982/23367/10959/5300/84305/9698/25929/10658/48/1153/79068/2107/1983/5936/1965/1191/8667/149986/3692/9444/9939/5976/23654/23019/8662/10985/708/84271/27335/3673/1974/7812/10131/8664/7458/136319/3646/23521/1975/10643/6472/5594/8663/23435/6134/1981/10644/7555/1968/1656/10128/6203/5499/…	108
GO:0009150	BP	GO:0009150	purine ribonucleotide metabolic process	95/1773	408/18862	3.89679e-17	2.08195e-15	1.54119e-15	131870/79966/23279/5571/79631/79877/84532/9061/4597/23597/8604/2584/5214/23165/55229/348995/11165/23636/10380/55746/81929/283209/8473/79902/10165/28964/4976/158/8801/6576/4927/3251/204/9567/2773/8021/8573/51144/9631/9524/1743/8480/1737/23225/3692/30968/10654/4967/5471/3295/1738/5160/8803/5162/3094/6396/10632/8833/9688/5198/203/4513/230/523/509/10476/522/471/38/2618/539/515/7175/5236/5213/47/5211/…	95
GO:0060147	BP	GO:0060147	regulation of posttranscriptional gene silencing	46/1773	124/18862	5.32426e-17	2.81725e-15	2.08551e-15	23279/10269/5605/5434/5432/23165/348995/23636/55746/81929/5430/79902/5604/4927/5437/8087/57510/8021/9698/9631/8480/23225/103/5431/6396/9688/1981/1656/7175/1994/1655/1660/8294/8359/8360/8361/8362/8363/8364/8365/8366/8367/8368/8370/121504/554313	46
GO:0043161	BP	GO:0043161	proteasome-mediated ubiquitin-dependent protein catabolic process	97/1773	425/18862	7.38842e-17	3.87224e-15	2.86649e-15	408/8450/55666/23376/2931/116988/23197/5711/6386/8065/5721/201595/5683/8453/23190/5714/8473/4130/8451/5713/7917/23640/5716/8454/10197/207/10134/6599/79718/57092/5690/29978/29979/9491/9373/5720/10213/23321/1191/8667/10952/11160/3093/9112/6923/5710/8452/5695/9097/5684/2932/51035/6449/23327/5704/5702/56893/9861/7874/5694/5706/5718/5691/5700/5692/5709/5705/5685/5719/5689/6500/5686/55968/5707/5682/571…	97
GO:0060966	BP	GO:0060966	regulation of gene silencing by RNA	46/1773	125/18862	7.66775e-17	3.98072e-15	2.94679e-15	23279/10269/5605/5434/5432/23165/348995/23636/55746/81929/5430/79902/5604/4927/5437/8087/57510/8021/9698/9631/8480/23225/103/5431/6396/9688/1981/1656/7175/1994/1655/1660/8294/8359/8360/8361/8362/8363/8364/8365/8366/8367/8368/8370/121504/554313	46
GO:0002244	BP	GO:0002244	hematopoietic progenitor cell differentiation	53/1773	161/18862	9.53835e-17	4.90556e-15	3.63142e-15	23215/23376/5711/5721/5683/54940/132299/5714/5610/5713/5716/51119/10197/25942/51441/5690/9491/5720/10213/7153/103/5710/5695/5684/11051/5704/5702/9861/5694/5706/5718/5691/5700/5692/5709/5705/5685/5719/5689/5686/5707/5682/5717/5688/6422/5693/5687/5708/5701/7520/3313/5591/1938	53
GO:0071103	BP	GO:0071103	DNA conformation change	85/1773	352/18862	1.83871e-16	9.36888e-15	6.93547e-15	1107/8450/1788/6594/54623/3065/53615/546/8260/8451/23347/5931/5984/4361/5965/5982/51773/64151/9131/9918/7150/7153/1786/10541/3024/10146/9733/22985/10592/8520/6742/10051/8467/301/8607/7175/201161/3005/8815/55506/6117/1642/10856/1653/3149/50809/4174/9555/6418/4176/5928/4676/7520/8091/7155/4175/4673/4172/4171/8971/142/3148/4678/2547/1660/4869/10155/3009/3146/6233/3181/8294/8359/8360/8361/8362/8363/8…	85
GO:0042254	BP	GO:0042254	ribosome biogenesis	77/1773	307/18862	5.29026e-16	2.67085e-14	1.97714e-14	131870/8450/6169/79631/57418/22907/22894/5394/55759/55651/8886/4839/55226/9188/2752/1736/51729/11224/11157/6229/8451/5303/55623/27043/2091/26156/4927/51119/22803/9092/23517/51602/6059/3692/6209/9045/6128/708/6234/4809/6232/6165/10528/6230/6204/6194/6134/6152/6217/6203/6155/6201/6227/4736/6218/7514/6135/6193/6147/6122/5036/9775/6202/6223/6129/6125/6187/6208/7520/6130/6175/3921/10521/51504/5591/486…	77
GO:0060964	BP	GO:0060964	regulation of gene silencing by miRNA	44/1773	121/18862	6.02043e-16	3.01186e-14	2.22958e-14	23279/10269/5605/5434/5432/23165/348995/23636/55746/81929/5430/79902/5604/4927/5437/8087/8021/9698/9631/8480/23225/5431/6396/9688/1981/1656/7175/1994/1655/1660/8294/8359/8360/8361/8362/8363/8364/8365/8366/8367/8368/8370/121504/554313	44
GO:1901990	BP	GO:1901990	regulation of mitotic cell cycle phase transition	97/1773	439/18862	6.95975e-16	3.45041e-14	2.55422e-14	4849/10142/95681/26060/79577/84687/10498/5711/55198/23236/581/5721/9183/5683/5714/7283/8451/5713/5716/8454/4204/10197/4361/207/5356/25942/11258/5577/23332/5690/9491/8883/51143/5720/10213/5710/8452/23019/5695/7756/5684/55031/5704/5702/9861/5694/5706/5718/5691/5962/5700/5692/5709/2273/5705/5685/5719/1981/10382/5689/301/1781/6500/9793/5686/11331/6118/5707/5682/5717/8655/5688/7175/5693/5687/55920/570…	97
GO:0007015	BP	GO:0007015	actin filament organization	96/1773	435/18862	1.06981e-15	5.25639e-14	3.89113e-14	408/388/5921/23164/10006/57175/64780/57482/10580/84687/1729/63916/83543/5058/2314/23191/57698/2909/2885/10391/1073/11344/5756/23122/382/10093/10094/822/10788/81553/3092/23332/29767/23580/79585/9181/55704/10092/10152/7791/2764/4646/120/8452/9124/7082/119/1496/55740/28988/26999/11151/23406/136319/800/10552/5962/51571/2017/10109/10787/22902/5217/830/10097/5879/87/6712/6422/23603/387/11034/118/7170/1…	96
GO:0009060	BP	GO:0009060	aerobic respiration	36/1773	86/18862	1.51748e-15	7.38998e-14	5.47055e-14	4728/54205/1345/6390/8801/847/1743/48/8802/1737/9377/4697/4200/4967/1340/1738/7381/5160/8803/5162/6389/4513/2271/1431/6472/1329/23530/1327/7384/50/7385/3417/3418/4190/4191/7415	36
GO:0038093	BP	GO:0038093	Fc receptor signaling pathway	65/1773	239/18862	1.54704e-15	7.46785e-14	5.52819e-14	7410/26060/10006/5532/5711/55198/5721/63916/5683/5714/5058/5713/23191/5716/8454/2885/10197/10093/10094/5690/9491/5720/10213/10092/1398/5710/5695/5684/26999/5335/5704/5702/9861/5694/5706/5718/10552/5691/5700/5692/10109/5709/5594/10787/5705/5685/5719/5689/6500/5686/10097/5879/5707/5682/5717/5688/5693/5687/5708/5701/10096/5062/3320/801/71	65
GO:0002223	BP	GO:0002223	stimulatory C-type lectin receptor signaling pathway	42/1773	114/18862	1.60897e-15	7.69926e-14	5.6995e-14	5711/5721/5683/5714/5058/5713/5716/8454/10197/5690/9491/5720/10213/5710/5695/5684/5567/5704/5702/9861/5694/5706/5718/5691/5700/5692/5709/5705/5685/5719/5689/6500/5686/5707/5682/5717/5688/5693/5687/5708/5701/5062	42
GO:0045089	BP	GO:0045089	positive regulation of innate immune response	62/1773	223/18862	2.26257e-15	1.07335e-13	7.94568e-14	57506/85364/5711/5721/5683/5714/5058/5713/5716/8454/10197/23705/25942/5690/9491/164/5720/10213/3093/5710/5695/5684/5567/5704/5702/9868/9861/5694/5706/5718/5691/5700/5692/5709/5705/5685/5719/5689/6500/5686/5707/5682/5717/55269/5688/5693/5687/10432/5708/5701/5062/6223/7520/3148/6421/2547/9782/3320/1660/5591/4841/3146	62
GO:1900034	BP	GO:1900034	regulation of cellular response to heat	34/1773	79/18862	3.37852e-15	1.58906e-13	1.17633e-13	23279/23165/348995/23636/55746/81929/79902/4927/8021/26973/9631/7266/8480/3281/23225/3337/6119/6396/9688/2932/5594/10728/6118/57805/7175/4137/6117/2288/10808/3320/3303/3304/7531/3312	34
GO:0038061	BP	GO:0038061	NIK/NF-kappaB signaling	55/1773	185/18862	3.77226e-15	1.75921e-13	1.30229e-13	3611/5531/5711/5721/5683/54386/5714/5610/5713/5716/5495/8454/10197/207/10920/5690/9491/5720/10213/27250/5710/5695/5684/5704/5702/9861/5694/5706/5718/5691/5700/5692/5709/5705/5685/5719/5689/6500/5686/11331/5707/5682/5717/5688/5245/5693/387/5687/5708/5701/81/6188/811/7114/3146	55
GO:0032535	BP	GO:0032535	regulation of cellular component size	85/1773	370/18862	4.2273e-15	1.95486e-13	1.44712e-13	1020/7410/5921/57611/57175/5868/57482/5058/2314/23191/57698/2909/8301/4897/2885/4035/1073/207/11344/1630/25942/5756/382/9798/10093/23011/10094/1982/822/10788/3897/81553/29767/23580/23028/10092/10152/1785/2764/120/119/1173/1496/28988/2932/26999/11151/23406/136319/10552/5962/51571/2017/10109/10787/51520/22902/5217/830/10097/5879/5499/6712/387/4137/11034/118/10096/9948/829/4478/832/50809/23499/375/5…	85
GO:0045653	BP	GO:0045653	negative regulation of megakaryocyte differentiation	16/1773	18/18862	4.4479e-15	2.03973e-13	1.50995e-13	2551/3276/8294/8359/8360/8361/8362/8363/8364/8365/8366/8367/8368/8370/121504/554313	16
GO:0001732	BP	GO:0001732	formation of cytoplasmic translation initiation complex	15/1773	16/18862	5.4679e-15	2.48677e-13	1.84087e-13	8665/1983/10480/8667/8662/8666/8669/8894/27335/51386/8664/3646/8668/8663/8661	15
GO:0043044	BP	GO:0043044	ATP-dependent chromatin remodeling	36/1773	89/18862	5.55032e-15	2.50356e-13	1.8533e-13	1107/6594/3065/53615/55193/5931/51773/6599/6605/81611/6598/8289/6597/6601/9219/86/8467/8607/3066/5928/4678/4869/8294/8359/8360/8361/8362/8363/8364/8365/8366/8367/8368/8370/121504/554313	36
GO:0048193	BP	GO:0048193	Golgi vesicle transport	85/1773	372/18862	5.88985e-15	2.63511e-13	1.95068e-13	149371/11316/23233/80055/5537/55738/6836/10652/55770/10640/10067/55860/9135/57410/60412/10016/57222/10972/4218/29934/9183/399687/8943/6643/55291/10134/11258/64837/51479/10959/22818/23760/164/51143/79585/26958/22820/9217/9632/1785/81876/23256/8452/10890/22872/378/8724/140735/372/6396/381/1783/10484/51164/3996/4905/10434/8615/10342/160/9554/51552/9522/9276/1781/1315/830/8775/10525/1314/6712/8655/40…	85
GO:0002220	BP	GO:0002220	innate immune response activating cell surface receptor signaling pathway	42/1773	118/18862	6.60643e-15	2.93187e-13	2.17036e-13	5711/5721/5683/5714/5058/5713/5716/8454/10197/5690/9491/5720/10213/5710/5695/5684/5567/5704/5702/9861/5694/5706/5718/5691/5700/5692/5709/5705/5685/5719/5689/6500/5686/5707/5682/5717/5688/5693/5687/5708/5701/5062	42
GO:0019886	BP	GO:0019886	antigen processing and presentation of exogenous peptide antigen via MHC class II	38/1773	99/18862	7.51792e-15	3.30969e-13	2.45005e-13	6456/1175/55860/8907/11258/64837/10120/164/51143/162/1211/9632/1785/22872/140735/1173/6396/1783/10484/51164/160/161/1509/1781/830/6712/8655/10121/7879/829/163/832/375/10540/1639/821/1213/1778	38
GO:0010498	BP	GO:0010498	proteasomal protein catabolic process	101/1773	483/18862	7.95351e-15	3.47367e-13	2.57144e-13	408/8450/55666/23376/2931/116988/23197/5711/6386/8065/5721/57095/201595/5683/8453/23190/5714/8473/4130/8451/5713/7917/2876/23640/5716/8454/10197/207/10134/6599/79718/57092/5690/29978/29979/9491/9373/5720/10213/23321/1191/8667/10952/11160/3093/9112/6923/5710/8452/5695/9097/5684/2932/51035/6449/23327/5704/5702/56893/9861/7874/5694/56886/5706/5718/5691/5700/5692/5709/5705/5685/5719/5689/6500/5686/55…	101
GO:0043687	BP	GO:0043687	post-translational protein modification	83/1773	361/18862	8.5079e-15	3.68653e-13	2.72901e-13	8450/26043/54165/5868/51280/4218/5711/8065/5721/9318/201595/5683/8453/5714/64708/64122/4924/8451/5713/10238/5716/8454/5931/2873/10197/10987/10920/10980/5690/9039/51138/9491/8883/3703/5720/10213/8533/81876/6923/5710/8452/5695/5684/9040/5704/5702/9861/5694/6921/5706/5718/5691/5700/5692/5954/5709/5705/5685/5719/5689/6500/5686/2266/813/5707/5682/5717/5862/5688/5693/5687/1462/5708/5701/1642/336/5589/1…	83
GO:0019058	BP	GO:0019058	viral life cycle	81/1773	348/18862	8.71139e-15	3.74522e-13	2.77246e-13	975/23279/89853/1948/5091/5868/5586/3685/57506/23165/348995/23636/55746/27336/81929/5610/950/79902/7251/7037/4927/8021/9798/6780/23367/28972/9631/3839/8480/64710/3836/23225/51510/7153/6993/9217/6598/103/51160/1525/81876/8724/6396/9688/3673/3838/1487/3688/51534/23327/51495/10015/682/1656/1488/5094/7175/5245/9218/7514/8815/7913/1642/7879/5479/8091/7155/5034/3956/3837/3921/4684/7415/3609/5093/5901/3…	81
GO:0002758	BP	GO:0002758	innate immune response-activating signal transduction	42/1773	119/18862	9.29355e-15	3.96453e-13	2.93481e-13	5711/5721/5683/5714/5058/5713/5716/8454/10197/5690/9491/5720/10213/5710/5695/5684/5567/5704/5702/9861/5694/5706/5718/5691/5700/5692/5709/5705/5685/5719/5689/6500/5686/5707/5682/5717/5688/5693/5687/5708/5701/5062	42
GO:0000723	BP	GO:0000723	telomere maintenance	50/1773	161/18862	9.88021e-15	4.18237e-13	3.09606e-13	5394/55651/55226/1736/54386/546/5984/4361/5982/5424/5976/6119/56252/7874/5594/10728/6118/6117/328/22948/7520/5111/10574/10575/6950/7203/3184/142/10576/3178/2547/3320/10694/5591/3192/3181/8294/8359/8360/8361/8362/8363/8364/8365/8366/8367/8368/8370/121504/554313	50
GO:1901987	BP	GO:1901987	regulation of cell cycle phase transition	100/1773	478/18862	1.05218e-14	4.41998e-13	3.27196e-13	4849/10142/95681/26060/79577/54623/84687/10498/5711/55198/23236/581/5721/9183/5683/5714/7283/8451/5713/5716/8454/4204/10197/4361/207/5356/25942/11258/5577/23332/5690/9491/8883/51143/5720/10213/5710/8452/23019/5695/7756/5684/55031/5704/5702/9861/5694/5706/5718/5691/5962/5700/5692/5709/2273/5705/5685/5719/1981/10382/5689/301/1781/6500/9793/5686/11331/6118/5707/5682/5717/8655/5688/7175/5693/5687/559…	100
GO:0022900	BP	GO:0022900	electron transport chain	53/1773	178/18862	1.11244e-14	4.63768e-13	3.43312e-13	126328/4709/4728/51079/54205/27089/4704/4723/444/91942/4698/1528/8604/4706/4712/1345/4702/1537/6390/4705/4724/79751/10165/7264/55967/4729/2936/80777/4720/2109/9377/4697/4722/4200/1340/1738/7381/6389/2108/4513/5860/2820/1329/4719/7386/1327/7384/7385/231/10327/128/26227/11315	53
GO:0000380	BP	GO:0000380	alternative mRNA splicing, via spliceosome	32/1773	73/18862	1.15832e-14	4.79266e-13	3.54784e-13	10656/4857/9589/9513/10659/8087/10921/84991/10658/23028/5936/58517/8241/9939/55234/10284/6431/4858/8683/9967/6434/22827/1655/5725/6426/6421/3178/10521/1660/3191/4670/3192	32
GO:0022904	BP	GO:0022904	respiratory electron transport chain	41/1773	117/18862	2.55827e-14	1.05061e-12	7.7773e-13	126328/4709/4728/51079/54205/27089/4704/4723/4698/8604/4706/4712/1345/4702/1537/6390/4705/4724/79751/10165/55967/4729/4720/2109/9377/4697/4722/1340/1738/7381/6389/2108/4513/2820/1329/4719/7386/1327/7384/7385/11315	41
GO:0002495	BP	GO:0002495	antigen processing and presentation of peptide antigen via MHC class II	38/1773	103/18862	3.37155e-14	1.37435e-12	1.01738e-12	6456/1175/55860/8907/11258/64837/10120/164/51143/162/1211/9632/1785/22872/140735/1173/6396/1783/10484/51164/160/161/1509/1781/830/6712/8655/10121/7879/829/163/832/375/10540/1639/821/1213/1778	38
GO:0002504	BP	GO:0002504	antigen processing and presentation of peptide or polysaccharide antigen via MHC class II	38/1773	104/18862	4.83641e-14	1.95697e-12	1.44868e-12	6456/1175/55860/8907/11258/64837/10120/164/51143/162/1211/9632/1785/22872/140735/1173/6396/1783/10484/51164/160/161/1509/1781/830/6712/8655/10121/7879/829/163/832/375/10540/1639/821/1213/1778	38
GO:0070646	BP	GO:0070646	protein modification by small protein removal	72/1773	300/18862	5.32487e-14	2.13889e-12	1.58335e-12	8295/84196/57599/11047/23358/8027/5711/5721/9318/5683/5714/64708/8473/5713/5716/4089/2873/10197/8665/10987/10920/10980/9100/5690/10713/51138/9491/9146/5720/10213/8533/5710/9733/5695/9097/8724/5684/55031/51035/5704/5702/9861/7874/5694/5706/5718/5691/5700/5692/6472/5709/5705/5685/5719/86/5689/5686/8607/5707/5682/5717/5688/5693/387/5687/5708/5701/55611/11315/7415/7345/6233	72
GO:0071824	BP	GO:0071824	protein-DNA complex subunit organization	69/1773	281/18862	5.44189e-14	2.17005e-12	1.60642e-12	8450/54623/546/6830/8451/5931/51773/6599/6605/81611/6598/10541/23126/3024/6119/8289/9733/8520/6597/7343/5704/5702/5706/6601/5705/8467/6118/8607/201161/3005/55506/6117/5701/1642/50809/9349/11198/4174/9555/6418/4176/5928/4676/4175/4673/4172/4171/8971/142/3148/4678/4869/3009/3146/6233/8294/8359/8360/8361/8362/8363/8364/8365/8366/8367/8368/8370/121504/554313	69
GO:0006099	BP	GO:0006099	tricarboxylic acid cycle	21/1773	34/18862	6.79223e-14	2.68904e-12	1.9906e-12	6390/8801/1743/48/8802/1737/4200/4967/1738/5160/8803/5162/6389/2271/1431/23530/50/3417/3418/4190/4191	21
GO:0006333	BP	GO:0006333	chromatin assembly or disassembly	59/1773	221/18862	7.64277e-14	2.99869e-12	2.21983e-12	1107/1788/54623/3065/53615/546/55201/23347/5931/51773/6599/9031/6605/6598/1786/10541/3024/8289/9733/8520/6597/6601/9219/8467/8607/7175/201161/3005/55506/50809/11198/9555/6418/5928/4676/8091/4673/4171/8971/3148/4678/4869/10155/3009/3146/8294/8359/8360/8361/8362/8363/8364/8365/8366/8367/8368/8370/121504/554313	59
GO:0045088	BP	GO:0045088	regulation of innate immune response	74/1773	315/18862	7.68337e-14	2.99869e-12	2.21983e-12	25939/26007/26060/5770/57506/85364/5711/55198/5721/5683/5714/5058/5713/5716/8454/10197/23705/25942/51441/5690/9491/164/5781/5720/10213/6059/1398/103/23170/3093/5710/5695/5684/5567/5704/5702/9868/11140/9861/5694/5706/5718/5691/5700/5692/5709/5705/5685/5719/5689/6500/5686/5707/5682/5717/55269/5688/5693/5687/10432/5708/5701/5062/6223/7520/3148/6421/2547/9782/3320/1660/5591/4841/3146	74
GO:0090263	BP	GO:0090263	positive regulation of canonical Wnt signaling pathway	46/1773	147/18862	8.42318e-14	3.26428e-12	2.41643e-12	3611/5711/5721/5683/5714/5713/5716/5495/10197/5300/79718/5690/9491/5720/10213/5710/5695/5684/55031/5704/5702/9861/5694/5706/5718/5691/5700/5692/5709/5705/5685/5719/5689/5686/8607/5707/5682/5717/5688/57805/6422/5693/5687/5708/5701/7415	46
GO:0062012	BP	GO:0062012	regulation of small molecule metabolic process	92/1773	437/18862	8.51045e-14	3.27504e-12	2.4244e-12	57486/23279/10269/5571/4597/1717/10580/2931/8604/5711/23165/55198/348995/5721/23636/5683/55746/1595/5714/81929/8473/79902/5713/28964/5716/4927/10197/207/9852/8021/9631/5690/8480/9491/4047/5720/10213/23225/3692/10654/5500/11160/5710/5695/2222/6396/5684/9688/2932/4513/3422/5704/5702/9861/7874/5694/5706/5718/5691/5700/5692/5709/5705/5685/5719/5689/301/5686/2224/5499/6647/5707/5682/5717/5688/7175/569…	92
GO:0006119	BP	GO:0006119	oxidative phosphorylation	46/1773	148/18862	1.11244e-13	4.25124e-12	3.14705e-12	126328/4709/4728/51079/54205/27089/4704/4723/4698/4706/4712/1345/4702/1537/4705/4724/55967/4729/4720/9377/4697/4722/30968/1340/1738/7381/10632/6389/4513/509/10476/522/6472/1329/4719/7386/4436/1327/539/515/7384/7385/11315/498/7415/506	46
GO:2000027	BP	GO:2000027	regulation of animal organ morphogenesis	51/1773	176/18862	1.1602e-13	4.40315e-12	3.2595e-12	1175/10082/5711/5721/5683/57216/5714/5713/5716/10197/5690/9491/5720/10213/183/5710/5695/1173/5684/5704/5702/9861/5694/5706/5718/160/5691/161/5700/5692/5709/5705/5685/5719/5689/5686/11331/5879/5707/5682/5717/5688/6422/5693/387/5687/5708/5701/163/2239/1213	51
GO:0009408	BP	GO:0009408	response to heat	48/1773	161/18862	1.88557e-13	7.10705e-12	5.26111e-12	8891/23279/8893/10016/23165/348995/23636/55746/81929/79902/5931/1967/4927/207/8021/26973/9631/7266/8480/3281/23225/1965/10294/3301/3337/6119/6396/9688/2932/5594/10728/6118/6647/57805/7175/4137/11168/6117/3066/2288/10808/488/7415/3320/3303/3304/7531/3312	48
GO:0036294	BP	GO:0036294	cellular response to decreased oxygen levels	57/1773	214/18862	2.24571e-13	8.4069e-12	6.22335e-12	867/1788/5711/5721/5683/8453/5714/5713/4976/5716/10197/207/5690/29979/9491/5720/10213/6923/5710/5695/5764/5684/10059/10449/5704/5702/9861/5694/6921/5706/5718/5691/5700/5692/5709/5705/5685/5719/5689/5686/11331/10525/23576/5707/5682/5717/5688/6422/5693/5687/5708/5701/9520/50809/5034/5230/6233	57
GO:0048863	BP	GO:0048863	stem cell differentiation	63/1773	251/18862	2.36011e-13	8.77546e-12	6.49617e-12	54888/10016/25920/23376/5711/5721/5683/54940/132299/5714/5610/5713/5716/4089/84844/10197/51441/9698/5690/9491/6660/5720/10213/5710/5695/5764/5684/11051/5704/5702/9861/5694/5706/5718/5691/5700/5692/1947/5709/5594/5705/5685/5719/5689/5686/5707/5682/5717/5688/6422/23603/5693/5687/5708/5701/2823/7520/8091/3313/309/2335/5591/3192	63
GO:0031124	BP	GO:0031124	mRNA 3'-end processing	36/1773	99/18862	2.64618e-13	9.77311e-12	7.2347e-12	23248/79577/54623/29894/6430/10250/79869/9295/57187/8189/51692/4686/10921/10212/81608/55197/1478/6829/9939/7307/11052/84271/11051/6626/6431/8683/6432/26097/6428/11338/10189/84324/6427/9775/7919/6426	36
GO:0002833	BP	GO:0002833	positive regulation of response to biotic stimulus	64/1773	258/18862	2.72013e-13	9.97923e-12	7.38729e-12	57506/85364/5711/5721/5683/5714/5058/5713/5716/8454/10197/23705/25942/9698/5690/9491/164/5720/10213/3093/5710/5695/5684/5567/5704/5702/9868/9861/5694/5706/5718/5691/5700/5692/5709/5705/5685/5719/5689/6500/5686/5707/5682/5717/55269/5688/5693/5687/10432/5708/5701/5062/6223/7520/3148/6421/2547/9782/3320/1660/5591/3329/4841/3146	64
GO:0008154	BP	GO:0008154	actin polymerization or depolymerization	57/1773	215/18862	2.78128e-13	1.0136e-11	7.50336e-12	5921/10006/57175/64780/57482/84687/1729/2314/23191/2909/2885/1073/11344/5756/382/10093/10094/822/10788/81553/29767/23580/79585/10092/10152/2764/120/119/1496/55740/28988/26999/11151/23406/136319/10552/5962/51571/2017/10109/10787/5217/830/10097/5879/6712/11034/118/10096/9948/829/832/375/6711/1627/7114/1072	57
GO:0032200	BP	GO:0032200	telomere organization	50/1773	174/18862	2.87973e-13	1.04257e-11	7.71782e-12	5394/55651/55226/1736/54386/546/5984/4361/5982/5424/5976/6119/56252/7874/5594/10728/6118/6117/328/22948/7520/5111/10574/10575/6950/7203/3184/142/10576/3178/2547/3320/10694/5591/3192/3181/8294/8359/8360/8361/8362/8363/8364/8365/8366/8367/8368/8370/121504/554313	50
GO:0034605	BP	GO:0034605	cellular response to heat	40/1773	120/18862	3.47777e-13	1.25086e-11	9.25969e-12	23279/10016/23165/348995/23636/55746/81929/79902/5931/4927/8021/26973/9631/7266/8480/3281/23225/1965/3337/6119/6396/9688/2932/5594/10728/6118/57805/7175/4137/6117/3066/2288/10808/488/7415/3320/3303/3304/7531/3312	40
GO:0031334	BP	GO:0031334	positive regulation of protein-containing complex assembly	63/1773	254/18862	4.20113e-13	1.50122e-11	1.1113e-11	51100/8450/10142/57175/57482/581/5058/8451/23191/7037/4204/2885/7453/382/4733/10093/10094/10788/23332/23580/10092/10152/1191/2764/6119/1496/79969/2932/11151/5704/5702/5706/10552/2017/10109/10787/5705/1981/5217/9793/10097/5879/6118/4137/6117/5701/1642/10096/4478/22919/375/1639/10399/142/6188/11315/7415/4926/3320/6624/3303/3304/4131	63
GO:0071456	BP	GO:0071456	cellular response to hypoxia	55/1773	206/18862	5.31856e-13	1.88826e-11	1.39782e-11	1788/5711/5721/5683/8453/5714/5713/4976/5716/10197/207/5690/29979/9491/5720/10213/6923/5710/5695/5764/5684/10449/5704/5702/9861/5694/6921/5706/5718/5691/5700/5692/5709/5705/5685/5719/5689/5686/11331/10525/23576/5707/5682/5717/5688/6422/5693/5687/5708/5701/9520/50809/5034/5230/6233	55
GO:0071453	BP	GO:0071453	cellular response to oxygen levels	59/1773	231/18862	6.09769e-13	2.151e-11	1.59231e-11	867/1788/9114/5711/5721/5683/8453/5714/5713/4976/5716/10197/207/5690/29979/9491/5720/10213/6923/5710/5695/5764/5684/10059/10449/5704/5702/523/9861/5694/6921/5706/5718/5691/5700/5692/5709/5705/5685/5719/5689/5686/11331/10525/23576/5707/5682/5717/5688/6422/5693/5687/5708/5701/9520/50809/5034/5230/6233	59
GO:0046390	BP	GO:0046390	ribose phosphate biosynthetic process	53/1773	195/18862	6.51879e-13	2.2849e-11	1.69143e-11	79966/79877/84532/9061/51727/8604/5636/55229/7372/10165/158/6576/3251/56474/204/2539/51144/9524/1737/30968/5471/1738/5160/5162/10632/8833/1503/5198/203/4513/523/509/10476/522/471/38/2618/539/515/47/3615/11332/4830/10606/7086/142/2194/498/7415/226/506/7114/5315	53
GO:1903829	BP	GO:1903829	positive regulation of cellular protein localization	69/1773	295/18862	6.69564e-13	2.33203e-11	1.72632e-11	1020/975/11143/9747/51100/10580/51024/8882/84687/57506/4836/2931/1736/23636/4130/5058/23184/7251/7037/4035/1459/207/382/2037/10204/55704/7332/51160/5764/2035/2932/3688/9141/5962/5594/23435/10055/3799/7175/8826/4137/10075/9520/163/4478/22948/3843/10574/10575/7533/10399/7529/6950/7203/57142/142/10576/11315/6711/4926/10694/7430/5901/7532/10971/10155/2316/7531/7534	69
GO:1902904	BP	GO:1902904	negative regulation of supramolecular fiber organization	47/1773	161/18862	7.88032e-13	2.72738e-11	2.01899e-11	57175/57482/10013/5203/2314/4089/10391/11344/50810/5756/23122/822/23332/29767/10471/9181/1191/7411/2764/120/5201/7082/119/6904/5202/1496/5204/11151/136319/5962/51571/10382/5217/830/6712/118/829/2288/11075/832/5062/22919/6711/4133/7114/4131/3312	47
GO:0009165	BP	GO:0009165	nucleotide biosynthetic process	64/1773	264/18862	8.33137e-13	2.85634e-11	2.11445e-11	79966/79877/84532/9061/1841/51727/4860/133686/8604/5636/55229/7372/10165/10135/158/6576/3251/56474/204/6241/128240/51144/9524/1737/30968/5471/1738/5160/5162/10632/8833/1503/5198/203/4513/2617/523/509/10476/522/5594/471/3735/38/2618/539/515/6240/47/1854/3615/11332/4830/10606/4522/3418/142/2194/498/7415/226/506/7114/5315	64
GO:0006090	BP	GO:0006090	pyruvate metabolic process	45/1773	150/18862	8.35672e-13	2.85634e-11	2.11445e-11	23279/5571/5091/2584/5214/23165/3029/348995/23636/55746/81929/283209/8473/79902/28964/4927/8021/63826/9631/8480/1737/23225/3692/4200/4967/1738/5160/5162/6396/2739/9688/230/682/7175/5236/5213/5211/7416/5223/226/3939/5230/7167/3945/5315	45
GO:0030177	BP	GO:0030177	positive regulation of Wnt signaling pathway	50/1773	179/18862	9.46014e-13	3.19381e-11	2.36427e-11	79577/3611/5711/5721/5683/5714/5713/5716/5495/10197/5300/79718/5690/9491/5720/10213/1457/5710/5695/5684/55031/6597/5704/5702/9861/5694/5706/5718/5691/5700/5692/5709/5705/5685/5719/5689/5686/8607/5707/5682/5717/5688/57805/6422/5693/5687/5708/5701/23499/7415	50
GO:0090090	BP	GO:0090090	negative regulation of canonical Wnt signaling pathway	50/1773	179/18862	9.46014e-13	3.19381e-11	2.36427e-11	55681/2931/5711/3065/5721/5683/5714/5713/3485/5716/10197/219287/5690/9491/5720/10213/2010/5710/8452/5695/5204/5684/2932/4192/5704/5702/9861/5694/5706/5718/5691/5700/5692/5709/5705/5685/5719/5689/5686/1500/5707/5682/5717/5688/6422/5693/5687/5708/5701/10856	50
GO:0075733	BP	GO:0075733	intracellular transport of virus	26/1773	57/18862	1.14296e-12	3.8352e-11	2.83907e-11	23279/89853/23165/348995/23636/55746/81929/79902/7251/4927/8021/9631/3839/8480/3836/23225/6993/51160/6396/9688/3838/7175/7514/3837/5901/6233	26
GO:0034660	BP	GO:0034660	ncRNA metabolic process	97/1773	492/18862	1.15106e-12	3.83896e-11	2.84186e-11	131870/54888/112858/80755/57418/22894/5394/84267/55759/55651/8886/4839/55226/29894/9188/1736/51729/11224/11157/6229/5303/55623/27043/2091/26156/51119/57510/7453/833/22803/9092/1478/23517/5859/51602/8565/103/3692/8575/6209/9045/92675/4141/10056/6234/2193/4809/9255/3376/6232/51637/6165/10528/2617/6230/5917/51520/3735/283742/6194/6217/6897/6203/6155/6201/6227/2058/3028/4736/27044/7407/6301/6218/4137…	97
GO:0065004	BP	GO:0065004	protein-DNA complex assembly	60/1773	241/18862	1.2779e-12	4.23632e-11	3.136e-11	8450/546/8451/5931/51773/6598/10541/23126/3024/6119/9733/8520/6597/7343/5704/5702/5706/5705/8467/6118/8607/201161/3005/55506/6117/5701/1642/50809/4174/9555/6418/4176/5928/4676/4175/4673/4172/4171/8971/142/3148/4678/4869/3009/3146/6233/8294/8359/8360/8361/8362/8363/8364/8365/8366/8367/8368/8370/121504/554313	60
GO:0038095	BP	GO:0038095	Fc-epsilon receptor signaling pathway	48/1773	169/18862	1.377e-12	4.52477e-11	3.34953e-11	7410/5532/5711/5721/5683/5714/5058/5713/5716/8454/2885/10197/5690/9491/5720/10213/5710/5695/5684/5335/5704/5702/9861/5694/5706/5718/5691/5700/5692/5709/5594/5705/5685/5719/5689/6500/5686/5879/5707/5682/5717/5688/5693/5687/5708/5701/5062/801	48
GO:0010639	BP	GO:0010639	negative regulation of organelle organization	76/1773	346/18862	1.38136e-12	4.52477e-11	3.34953e-11	57175/57482/4682/5394/10013/55226/9183/54386/546/8260/2314/2876/7037/4976/5716/4089/10391/207/11344/50810/5756/23122/822/23332/29767/51143/5573/9181/7153/1191/1785/2764/120/23256/7082/119/7756/6904/1496/10059/10449/11151/10493/136319/5962/51571/9554/10382/5217/830/6712/7175/4137/10432/118/10075/9184/7879/829/292/2288/11075/832/5062/22919/4134/4171/142/3178/6711/4869/3303/4133/7114/3192/4131	76
GO:1901293	BP	GO:1901293	nucleoside phosphate biosynthetic process	64/1773	267/18862	1.43429e-12	4.67036e-11	3.45731e-11	79966/79877/84532/9061/1841/51727/4860/133686/8604/5636/55229/7372/10165/10135/158/6576/3251/56474/204/6241/128240/51144/9524/1737/30968/5471/1738/5160/5162/10632/8833/1503/5198/203/4513/2617/523/509/10476/522/5594/471/3735/38/2618/539/515/6240/47/1854/3615/11332/4830/10606/4522/3418/142/2194/498/7415/226/506/7114/5315	64
GO:0000245	BP	GO:0000245	spliceosomal complex assembly	31/1773	80/18862	1.67206e-12	5.41255e-11	4.00672e-11	55692/51340/6430/6635/6631/10659/4686/51747/6637/8175/10658/10713/9416/6431/51631/8683/7536/10946/22827/6632/10291/11168/58155/1653/24148/23020/6633/7919/27339/23451/6426	31
GO:0034504	BP	GO:0034504	protein localization to nucleus	65/1773	275/18862	1.88875e-12	6.07823e-11	4.49951e-11	1020/11143/26953/26060/25777/54623/8882/57506/2752/55198/1736/23636/23534/55746/79902/7037/4927/207/5356/25942/8021/5300/9631/3839/10204/3836/3840/5905/51569/6396/9688/9201/2932/3838/3842/5594/23435/6500/11331/55705/10527/7175/1994/6135/9349/7295/1434/22948/3843/1495/10574/3837/10575/6950/7203/142/10576/11315/811/10694/5901/10155/3192/2316/7531	65
GO:0006888	BP	GO:0006888	endoplasmic reticulum to Golgi vesicle-mediated transport	54/1773	206/18862	1.91418e-12	6.12426e-11	4.53358e-11	11316/80055/5537/55738/10652/55860/10016/57222/10972/9183/55291/10134/11258/10959/22818/51143/26958/22820/9217/9632/81876/23256/8452/22872/378/140735/372/6396/1783/10484/51164/4905/8615/10342/9554/9276/1781/1315/830/8775/10525/1314/6712/8655/9218/10121/829/832/375/10540/1639/6711/7415/1778	54
GO:0042176	BP	GO:0042176	regulation of protein catabolic process	81/1773	383/18862	2.07214e-12	6.59132e-11	4.87933e-11	975/51079/23376/79888/2931/7337/6386/23192/29934/5721/57095/1595/4898/8473/4130/7917/2876/23640/5716/4035/10197/1459/207/10134/6599/5300/29978/1917/29979/9491/9146/5720/10213/1191/8667/51160/1457/3093/6923/9097/8724/2932/51035/4905/6449/23327/5704/5702/56893/7874/5962/5700/9554/6625/5709/55737/5707/6201/57805/5245/7514/5708/5701/10075/1642/6135/7879/4478/9349/23450/6125/302/10399/11315/7415/3320/…	81
GO:0007006	BP	GO:0007006	mitochondrial membrane organization	43/1773	144/18862	3.18807e-12	1.00827e-10	7.46391e-11	51079/55750/10651/23593/4836/25813/2931/581/56993/4976/92609/10939/6993/1267/3954/10632/10449/2932/54927/9868/9141/509/10476/522/539/515/10989/292/7417/3313/7533/7529/3308/498/3320/7532/506/10971/3303/801/808/7531/7534	43
GO:0051052	BP	GO:0051052	regulation of DNA metabolic process	76/1773	353/18862	3.9667e-12	1.24736e-10	9.23376e-11	131870/11143/10269/57418/57599/84309/9320/1676/5531/5394/2931/55226/581/53615/1736/54386/546/6830/8451/23347/7037/4204/5984/4361/207/5982/151987/64710/23028/3836/10419/3024/5976/3838/56893/56252/7874/5594/10728/4436/10097/6118/10189/2956/3005/7913/55611/7158/7334/10923/7919/22948/7520/8091/5111/10574/10575/2521/6950/7203/3184/8971/142/6188/10576/3178/3320/10694/1660/5591/4869/10155/3009/3192/3146…	76
GO:0006283	BP	GO:0006283	transcription-coupled nucleotide-excision repair	29/1773	73/18862	4.16669e-12	1.3028e-10	9.6442e-11	8450/3978/5434/5432/9318/64708/5430/8451/2873/5984/5437/5982/5424/3980/10987/10920/10980/51138/8533/6119/5431/3150/7874/6118/6117/1642/27339/5111/6233	29
GO:0050852	BP	GO:0050852	T cell receptor signaling pathway	53/1773	204/18862	4.46615e-12	1.38854e-10	1.02789e-10	975/8891/8893/5711/5721/5683/5714/5058/5713/5716/8454/1967/10197/5690/9491/5720/10213/30968/5710/5695/5684/29085/5335/5704/5702/9861/5694/5706/5718/5691/5700/5692/5709/5594/5705/5685/5719/1399/5689/6500/5686/5707/5682/5717/5688/5693/5687/5708/5701/5062/7334/6188/7430	53
GO:0006839	BP	GO:0006839	mitochondrial transport	64/1773	274/18862	4.89151e-12	1.51224e-10	1.11946e-10	51100/51079/55750/10651/23593/51024/4836/25813/2931/8604/54332/9512/581/29957/10452/9049/79751/10165/81855/10469/56993/4976/92609/6576/1459/10134/10939/9131/6993/7332/1267/30968/3954/10632/10449/2932/9868/293/9141/509/10476/522/94081/55737/10055/539/515/10075/9520/292/7417/7416/7533/7529/3308/498/3320/3329/7532/506/10971/3303/7531/7534	64
GO:0001666	BP	GO:0001666	response to hypoxia	75/1773	348/18862	5.21786e-12	1.60413e-10	1.18748e-10	3163/1788/5711/5721/5683/8453/5714/5058/5713/4976/5716/4204/4089/10197/207/847/824/481/5300/6648/5690/29979/9491/5720/10213/9361/6513/6923/23256/5710/9124/5695/5764/5684/10059/10449/3673/5704/5702/9861/5694/6921/5706/5718/5691/5700/5692/5709/5705/5685/5719/5689/5686/11331/10525/23576/5707/5682/5717/5688/6422/5693/5687/5708/5701/9520/50809/191/5034/81/7184/3939/5230/5315/6233	75
GO:0044106	BP	GO:0044106	cellular amine metabolic process	45/1773	158/18862	6.19147e-12	1.89287e-10	1.40123e-10	1312/6723/5711/5721/5683/5714/5713/5716/4204/3251/10197/5690/9491/5720/10213/5710/5695/5684/5704/136319/5702/9861/5694/5706/5718/5691/5700/5692/5709/5705/5685/5719/5689/5686/5707/5682/5717/5688/5693/5687/5708/5701/231/501/11315	45
GO:0032386	BP	GO:0032386	regulation of intracellular transport	75/1773	350/18862	7.00712e-12	2.12992e-10	1.5767e-10	1020/975/9747/54888/51100/80055/56850/5605/5770/51024/8882/57506/55677/4836/2931/25930/29934/23636/6830/5058/4924/5604/6342/1459/10134/8021/23011/392/4659/10204/5781/5936/7332/10541/7905/23256/2010/5905/11052/51569/8724/2932/7874/9141/5962/5594/23435/22902/10055/3799/7175/10075/9520/4478/375/7295/3843/302/7533/7529/11315/4926/7430/1660/2664/5901/7532/10971/10155/4133/1778/2316/7531/4131/7534	75
GO:0009260	BP	GO:0009260	ribonucleotide biosynthetic process	50/1773	188/18862	7.04424e-12	2.12992e-10	1.5767e-10	79966/79877/84532/9061/51727/8604/55229/7372/10165/158/6576/3251/56474/204/51144/9524/1737/30968/5471/1738/5160/5162/10632/8833/1503/5198/203/4513/523/509/10476/522/471/38/2618/539/515/47/3615/11332/4830/10606/142/2194/498/7415/226/506/7114/5315	50
GO:0016579	BP	GO:0016579	protein deubiquitination	65/1773	283/18862	7.39184e-12	2.2228e-10	1.64546e-10	8295/84196/57599/11047/23358/8027/5711/5721/5683/5714/8473/5713/5716/4089/10197/8665/10987/9100/5690/10713/9491/9146/5720/10213/5710/9733/5695/9097/8724/5684/55031/51035/5704/5702/9861/7874/5694/5706/5718/5691/5700/5692/6472/5709/5705/5685/5719/86/5689/5686/8607/5707/5682/5717/5688/5693/387/5687/5708/5701/55611/11315/7415/7345/6233	65
GO:0042775	BP	GO:0042775	mitochondrial ATP synthesis coupled electron transport	34/1773	99/18862	7.83485e-12	2.34321e-10	1.7346e-10	126328/4709/4728/51079/54205/27089/4704/4723/4698/4706/4712/1345/4702/1537/4705/4724/55967/4729/4720/9377/4697/4722/1340/1738/7381/6389/4513/1329/4719/7386/1327/7384/7385/11315	34
GO:0000381	BP	GO:0000381	regulation of alternative mRNA splicing, via spliceosome	25/1773	57/18862	9.14908e-12	2.72148e-10	2.01462e-10	10656/4857/9589/9513/10659/8087/10921/10658/5936/58517/8241/9939/55234/10284/6431/4858/9967/6434/22827/1655/5725/3178/10521/3191/3192	25
GO:0044766	BP	GO:0044766	multi-organism transport	27/1773	66/18862	1.00445e-11	2.95586e-10	2.18812e-10	23279/89853/23165/348995/23636/55746/81929/79902/7251/4927/8021/9631/3839/8480/3836/23225/6993/51160/6396/9688/3838/7175/7514/7879/3837/5901/6233	27
GO:1902579	BP	GO:1902579	multi-organism localization	27/1773	66/18862	1.00445e-11	2.95586e-10	2.18812e-10	23279/89853/23165/348995/23636/55746/81929/79902/7251/4927/8021/9631/3839/8480/3836/23225/6993/51160/6396/9688/3838/7175/7514/7879/3837/5901/6233	27
GO:0042773	BP	GO:0042773	ATP synthesis coupled electron transport	34/1773	100/18862	1.0809e-11	3.16394e-10	2.34216e-10	126328/4709/4728/51079/54205/27089/4704/4723/4698/4706/4712/1345/4702/1537/4705/4724/55967/4729/4720/9377/4697/4722/1340/1738/7381/6389/4513/1329/4719/7386/1327/7384/7385/11315	34
GO:0036293	BP	GO:0036293	response to decreased oxygen levels	76/1773	360/18862	1.09656e-11	3.19279e-10	2.36352e-10	867/3163/1788/5711/5721/5683/8453/5714/5058/5713/4976/5716/4204/4089/10197/207/847/824/481/5300/6648/5690/29979/9491/5720/10213/9361/6513/6923/23256/5710/9124/5695/5764/5684/10059/10449/3673/5704/5702/9861/5694/6921/5706/5718/5691/5700/5692/5709/5705/5685/5719/5689/5686/11331/10525/23576/5707/5682/5717/5688/6422/5693/5687/5708/5701/9520/50809/191/5034/81/7184/3939/5230/5315/6233	76
GO:0008064	BP	GO:0008064	regulation of actin polymerization or depolymerization	49/1773	185/18862	1.3416e-11	3.8857e-10	2.87645e-10	5921/57175/57482/2314/23191/2909/2885/1073/11344/5756/382/10093/10094/822/10788/81553/29767/23580/10092/10152/2764/120/119/1496/28988/26999/11151/23406/136319/10552/5962/51571/2017/10109/10787/5217/830/10097/6712/11034/118/10096/9948/829/832/375/6711/1627/7114	49
GO:0030832	BP	GO:0030832	regulation of actin filament length	49/1773	186/18862	1.65789e-11	4.75192e-10	3.51768e-10	5921/57175/57482/2314/23191/2909/2885/1073/11344/5756/382/10093/10094/822/10788/81553/29767/23580/10092/10152/2764/120/119/1496/28988/26999/11151/23406/136319/10552/5962/51571/2017/10109/10787/5217/830/10097/6712/11034/118/10096/9948/829/832/375/6711/1627/7114	49
GO:0033209	BP	GO:0033209	tumor necrosis factor-mediated signaling pathway	47/1773	174/18862	1.65795e-11	4.75192e-10	3.51768e-10	3611/5711/5721/5683/5714/5713/5716/10197/84817/5690/9491/5720/10213/3093/5710/5695/5684/5704/5702/9861/5694/5706/5718/5691/5700/5692/5709/5705/5685/5719/5689/5686/5707/5682/5717/5688/5693/5687/5708/5701/2950/10399/81/335/3303/3304/7114	47
GO:0034724	BP	GO:0034724	DNA replication-independent nucleosome organization	24/1773	54/18862	1.68329e-11	4.79956e-10	3.55295e-10	546/5931/51773/8520/8467/8607/11198/5928/4678/4869/8294/8359/8360/8361/8362/8363/8364/8365/8366/8367/8368/8370/121504/554313	24
GO:0019081	BP	GO:0019081	viral translation	13/1773	16/18862	1.83356e-11	5.20107e-10	3.85018e-10	28985/8665/8562/8662/8666/51386/7812/8664/8661/5094/6741/5725/1660	13
GO:0070482	BP	GO:0070482	response to oxygen levels	79/1773	385/18862	1.91572e-11	5.40626e-10	4.00207e-10	867/3163/1788/9114/5711/5721/5683/8453/5714/5058/5713/4976/5716/4204/4089/10197/207/847/824/481/5300/6648/5690/29979/9491/5720/10213/9361/6513/6923/23256/5710/9124/5695/5764/5684/10059/10449/3673/5704/5702/523/9861/5694/6921/5706/5718/5691/5700/5692/5709/5705/5685/5719/5689/5686/11331/10525/23576/5707/5682/5717/5688/6422/5693/5687/5708/5701/9520/3066/50809/191/5034/81/7184/3939/5230/5315/6233	79
GO:0009308	BP	GO:0009308	amine metabolic process	45/1773	163/18862	1.99314e-11	5.56765e-10	4.12154e-10	1312/6723/5711/5721/5683/5714/5713/5716/4204/3251/10197/5690/9491/5720/10213/5710/5695/5684/5704/136319/5702/9861/5694/5706/5718/5691/5700/5692/5709/5705/5685/5719/5689/5686/5707/5682/5717/5688/5693/5687/5708/5701/231/501/11315	45
GO:0051170	BP	GO:0051170	import into nucleus	45/1773	163/18862	1.99314e-11	5.56765e-10	4.12154e-10	26953/5571/26060/8882/57506/55198/6635/23636/23534/55746/79902/4927/207/6637/8021/25929/9631/3839/10204/3836/6636/3840/51569/6396/9688/3838/3842/5594/23435/6634/6632/11331/55705/10527/7175/1994/9349/6633/1434/3843/3837/3178/5901/10155/2316	45
GO:0030178	BP	GO:0030178	negative regulation of Wnt signaling pathway	53/1773	212/18862	2.19833e-11	6.10981e-10	4.52288e-10	55681/64359/2931/5711/3065/5721/5683/5714/5713/3485/5716/4035/10197/219287/5690/9491/5720/10213/2010/5710/8452/5695/5204/5684/2932/4192/5704/5702/9861/5694/5706/5718/5691/5700/5692/5709/5705/5685/5719/5689/5686/1500/5707/5682/5717/5688/6422/5693/5687/5708/5701/10856/10399	53
GO:0042255	BP	GO:0042255	ribosome assembly	26/1773	64/18862	2.9296e-11	8.0608e-10	5.96714e-10	6169/79631/22907/4839/51119/3692/6209/6128/708/6234/6232/6204/6134/6152/6135/6193/6147/6122/6223/6125/6208/7520/6175/3921/5591/4869	26
GO:0046794	BP	GO:0046794	transport of virus	26/1773	64/18862	2.9296e-11	8.0608e-10	5.96714e-10	23279/89853/23165/348995/23636/55746/81929/79902/7251/4927/8021/9631/3839/8480/3836/23225/6993/51160/6396/9688/3838/7175/7514/3837/5901/6233	26
GO:0031055	BP	GO:0031055	chromatin remodeling at centromere	22/1773	47/18862	3.30698e-11	9.0539e-10	6.70229e-10	5931/51773/8467/8607/201161/5928/4678/4869/8294/8359/8360/8361/8362/8363/8364/8365/8366/8367/8368/8370/121504/554313	22
GO:0034080	BP	GO:0034080	CENP-A containing nucleosome assembly	21/1773	43/18862	3.34398e-11	9.06498e-10	6.71049e-10	5931/51773/8467/8607/5928/4678/4869/8294/8359/8360/8361/8362/8363/8364/8365/8366/8367/8368/8370/121504/554313	21
GO:0061641	BP	GO:0061641	CENP-A containing chromatin organization	21/1773	43/18862	3.34398e-11	9.06498e-10	6.71049e-10	5931/51773/8467/8607/5928/4678/4869/8294/8359/8360/8361/8362/8363/8364/8365/8366/8367/8368/8370/121504/554313	21
GO:0009141	BP	GO:0009141	nucleoside triphosphate metabolic process	35/1773	109/18862	3.41984e-11	9.22519e-10	6.82909e-10	131870/25939/79631/1841/51727/8604/10165/4976/56474/9567/4521/2773/30968/10632/79077/1503/203/4513/523/509/10476/522/539/515/1854/3615/4830/142/498/7415/226/5901/506/7114/5315	35
GO:0006323	BP	GO:0006323	DNA packaging	57/1773	240/18862	3.5461e-11	9.5191e-10	7.04667e-10	1788/54623/3065/53615/546/8260/23347/5931/51773/64151/9131/9918/7153/1786/10541/3024/9733/22985/10592/8520/10051/8467/8607/7175/201161/3005/8815/55506/50809/9555/6418/5928/4676/8091/4673/4171/8971/3148/4678/4869/10155/3009/3146/8294/8359/8360/8361/8362/8363/8364/8365/8366/8367/8368/8370/121504/554313	57
GO:0110053	BP	GO:0110053	regulation of actin filament organization	62/1773	273/18862	3.72471e-11	9.95003e-10	7.36567e-10	5921/57175/57482/5058/2314/23191/2909/2885/10391/1073/11344/5756/23122/382/10093/10094/822/10788/81553/23332/29767/23580/55704/10092/10152/2764/120/7082/119/1496/28988/26999/11151/23406/136319/10552/5962/51571/2017/10109/10787/5217/830/10097/5879/6712/6422/387/11034/118/10096/9948/829/832/5062/375/6711/335/1627/7114/2316/71	62
GO:0070507	BP	GO:0070507	regulation of microtubule cytoskeleton organization	40/1773	137/18862	3.92721e-11	1.04403e-09	7.72861e-10	58497/10142/79187/10013/22924/23636/4130/55201/5058/10982/4204/50810/23122/4733/23332/8480/9181/51510/6904/79969/2932/1104/10382/9793/5879/7175/4137/2288/11075/22919/1639/6188/4926/1213/3303/3304/4133/1778/3192/4131	40
GO:0006364	BP	GO:0006364	rRNA processing	55/1773	228/18862	4.12013e-11	1.09005e-09	8.06928e-10	131870/57418/22894/5394/55759/55651/8886/4839/55226/9188/1736/51729/11224/11157/6229/5303/55623/27043/2091/26156/51119/22803/9092/23517/51602/3692/6209/9045/6234/4809/6232/6165/10528/6230/6194/6217/6203/6155/6201/6227/4736/6218/6135/5036/9775/6202/6223/6129/6125/6187/6208/6130/10521/51504/5591	55
GO:0071347	BP	GO:0071347	cellular response to interleukin-1	47/1773	180/18862	5.97229e-11	1.57251e-09	1.16408e-09	5711/23236/5721/5683/5714/5713/5716/8454/10197/9100/5690/9491/5720/10213/5976/5710/5695/5684/2244/5704/5702/9861/5694/5706/5718/5691/5700/5692/5709/5705/5685/5719/5689/6500/5686/5707/5682/5717/5688/6422/5693/5687/5708/5701/7334/9590/6233	47
GO:1901991	BP	GO:1901991	negative regulation of mitotic cell cycle phase transition	58/1773	250/18862	6.49458e-11	1.70189e-09	1.25985e-09	4849/79577/10498/5711/581/5721/9183/5683/5714/5713/5716/8454/10197/4361/5690/9491/8883/51143/5720/10213/5710/23019/5695/7756/5684/55031/5704/5702/9861/5694/5706/5718/5691/5700/5692/5709/2273/5705/5685/5719/5689/6500/5686/6118/5707/5682/5717/5688/7175/5693/5687/5708/5701/9184/3276/8091/5111/5591	58
GO:0009152	BP	GO:0009152	purine ribonucleotide biosynthetic process	46/1773	175/18862	7.46324e-11	1.94645e-09	1.44089e-09	79966/79877/84532/9061/8604/55229/10165/158/6576/3251/204/51144/9524/1737/30968/5471/1738/5160/5162/10632/8833/5198/203/4513/523/509/10476/522/471/38/2618/539/515/47/3615/11332/4830/10606/142/2194/498/7415/226/506/7114/5315	46
GO:0030833	BP	GO:0030833	regulation of actin filament polymerization	45/1773	169/18862	7.5114e-11	1.94977e-09	1.44335e-09	5921/57175/57482/2314/23191/2885/11344/5756/382/10093/10094/822/10788/81553/29767/23580/10092/10152/2764/120/119/1496/28988/26999/11151/23406/136319/10552/5962/51571/2017/10109/10787/5217/830/10097/6712/118/10096/829/832/375/6711/1627/7114	45
GO:0016072	BP	GO:0016072	rRNA metabolic process	56/1773	238/18862	7.74846e-11	2.00187e-09	1.48191e-09	131870/57418/22894/5394/55759/55651/8886/4839/55226/9188/1736/51729/11224/11157/6229/5303/55623/27043/2091/26156/51119/22803/9092/23517/51602/3692/6209/9045/6234/4809/6232/6165/10528/6230/6194/6217/6203/6155/6201/6227/4736/6218/4137/6135/5036/9775/6202/6223/6129/6125/6187/6208/6130/10521/51504/5591	56
GO:0051261	BP	GO:0051261	protein depolymerization	35/1773	112/18862	8.04391e-11	2.06849e-09	1.53123e-09	64780/57482/84687/10013/4130/55201/2314/1073/11344/50810/5756/23122/822/23332/29767/9181/120/119/6455/136319/5962/9793/830/6712/11034/118/9948/829/11075/832/6711/1072/10763/4131/3312	35
GO:0006336	BP	GO:0006336	DNA replication-independent nucleosome assembly	23/1773	53/18862	8.08754e-11	2.07003e-09	1.53238e-09	546/5931/51773/8520/8467/8607/5928/4678/4869/8294/8359/8360/8361/8362/8363/8364/8365/8366/8367/8368/8370/121504/554313	23
GO:0017038	BP	GO:0017038	protein import	49/1773	194/18862	8.43401e-11	2.13889e-09	1.58335e-09	26953/26060/8882/57506/25813/55198/23636/23534/10452/55746/79902/10469/56993/92609/4927/207/8021/9631/9131/3839/10204/3836/1191/3840/51569/6396/9688/3838/9868/3842/9141/5594/23435/11331/55705/10527/7175/1994/9349/1434/3843/3837/3308/3320/3329/5901/10155/2316/3312	49
GO:0031110	BP	GO:0031110	regulation of microtubule polymerization or depolymerization	29/1773	81/18862	8.4343e-11	2.13889e-09	1.58335e-09	58497/10142/10013/22924/4130/55201/5058/10982/4204/50810/23122/4733/23332/9181/6904/10382/9793/5879/4137/2288/11075/22919/1639/6188/4926/3303/3304/4133/4131	29
GO:0070585	BP	GO:0070585	protein localization to mitochondrion	41/1773	146/18862	8.65385e-11	2.1845e-09	1.61711e-09	51100/51079/55750/51024/4836/25813/2931/54332/9512/581/10452/9049/10469/56993/92609/1459/207/10134/9131/23788/7332/3301/10059/9868/293/9141/10055/4137/10075/9520/7533/7529/3308/3320/3329/7532/10971/801/808/7531/7534	41
GO:0030041	BP	GO:0030041	actin filament polymerization	48/1773	188/18862	8.75235e-11	2.19928e-09	1.62805e-09	5921/57175/57482/1729/2314/23191/2885/11344/5756/382/10093/10094/822/10788/81553/29767/23580/79585/10092/10152/2764/120/119/1496/28988/26999/11151/23406/136319/10552/5962/51571/2017/10109/10787/5217/830/10097/5879/6712/118/10096/829/832/375/6711/1627/7114	48
GO:0006418	BP	GO:0006418	tRNA aminoacylation for protein translation	21/1773	45/18862	9.96727e-11	2.49318e-09	1.84561e-09	80755/7453/833/5859/8565/4141/10056/2193/9255/3376/2617/5917/51520/3735/6897/2058/7407/6301/16/1615/5464	21
GO:0090066	BP	GO:0090066	regulation of anatomical structure size	92/1773	493/18862	1.01578e-10	2.52935e-09	1.87239e-09	1020/7410/5921/57611/57175/5868/57482/5058/2314/23191/2876/57698/2909/8301/4897/2885/4035/1073/207/11344/1630/25942/5756/382/9798/10093/23011/10094/1982/822/10788/6648/3897/81553/29767/23580/23028/10092/10152/5910/1785/183/2764/120/119/1173/1496/28988/2932/26999/11151/2244/23406/136319/10552/5962/51571/2017/10109/10787/51520/22902/5217/2266/830/10097/5879/5499/6647/6712/387/4137/11034/118/10096/9…	92
GO:0002831	BP	GO:0002831	regulation of response to biotic stimulus	82/1773	420/18862	1.09409e-10	2.71207e-09	2.00765e-09	25939/10269/26007/26060/5770/55666/57506/85364/5711/55198/5721/5683/5714/5058/5713/5716/5495/8454/10197/23705/25942/51441/9698/5690/9491/164/5781/5720/10213/6059/1398/103/23170/3093/5710/5695/708/5684/5567/5704/5702/9868/11140/9861/5694/5706/5718/5691/5700/5692/5709/5705/5685/5719/5689/6500/5686/5707/5682/5717/55269/5688/5094/5693/5687/10432/5708/5701/5062/6223/7520/3148/6421/7001/2547/9782/3320/…	82
GO:0034728	BP	GO:0034728	nucleosome organization	47/1773	183/18862	1.1037e-10	2.72361e-09	2.0162e-09	54623/546/6830/5931/51773/6599/6605/81611/6598/10541/3024/8289/9733/8520/6597/6601/8467/8607/3005/55506/50809/11198/9555/6418/5928/4676/4673/4171/8971/3148/4678/4869/3009/8294/8359/8360/8361/8362/8363/8364/8365/8366/8367/8368/8370/121504/554313	47
GO:0072522	BP	GO:0072522	purine-containing compound biosynthetic process	51/1773	208/18862	1.11665e-10	2.74328e-09	2.03076e-09	79966/79877/84532/9061/4860/8604/5636/55229/10165/158/6576/3251/204/4507/51144/9524/1737/30968/5471/1738/5160/5162/10632/8833/5198/203/4513/523/509/10476/522/6472/471/38/2618/539/515/47/3615/11332/4830/10606/4522/142/2194/498/7415/226/506/7114/5315	51
GO:0031123	BP	GO:0031123	RNA 3'-end processing	42/1773	153/18862	1.12776e-10	2.75824e-09	2.04183e-09	23248/79577/54623/5394/29894/6430/10250/79869/1736/9295/57187/2091/8189/51692/4686/10921/10212/81608/55197/1478/6829/9939/7307/11052/84271/11051/6626/6431/8683/6432/26097/6428/11338/10189/6227/3028/84324/6427/9775/6741/7919/6426	42
GO:0061077	BP	GO:0061077	chaperone-mediated protein folding	25/1773	63/18862	1.28819e-10	3.13668e-09	2.32198e-09	1676/80331/26973/7266/1191/1457/3337/10131/6449/9141/2280/10728/3336/2288/10808/5479/3313/9601/6767/3315/10576/3309/3303/3304/3312	25
GO:0031113	BP	GO:0031113	regulation of microtubule polymerization	22/1773	50/18862	1.49813e-10	3.63182e-09	2.68851e-09	58497/10142/22924/5058/4204/4733/23332/6904/10382/9793/5879/4137/2288/11075/22919/1639/6188/4926/3303/3304/4133/4131	22
GO:0006409	BP	GO:0006409	tRNA export from nucleus	18/1773	34/18862	1.52975e-10	3.67608e-09	2.72127e-09	23279/11260/23165/348995/23636/55746/81929/79902/4927/8021/9631/8480/23225/6396/9688/7175/6741/5901	18
GO:0071431	BP	GO:0071431	tRNA-containing ribonucleoprotein complex export from nucleus	18/1773	34/18862	1.52975e-10	3.67608e-09	2.72127e-09	23279/11260/23165/348995/23636/55746/81929/79902/4927/8021/9631/8480/23225/6396/9688/7175/6741/5901	18
GO:0044282	BP	GO:0044282	small molecule catabolic process	83/1773	431/18862	1.71465e-10	4.10021e-09	3.03525e-09	131870/586/51/26007/10455/26275/30/3033/7915/4860/5825/18/2931/8604/1666/2584/5096/5214/3029/2752/11165/10380/55577/283209/6342/5095/3251/207/4357/4521/4329/642/1743/224/6652/2109/55276/3032/51181/4967/5471/1891/1632/3295/10007/1738/2805/10449/1892/80150/11164/2108/230/5860/2820/875/102724560/6472/5019/1381/2098/38/39/23576/2806/5236/3028/5213/5211/3030/10327/2746/501/128/5226/191/11315/23564/522…	83
GO:0097064	BP	GO:0097064	ncRNA export from nucleus	19/1773	38/18862	1.72591e-10	4.10021e-09	3.03525e-09	23279/11260/23165/348995/23636/55746/81929/79902/4927/8021/9631/8480/23225/6396/9688/7175/6741/4869/5901	19
GO:0010948	BP	GO:0010948	negative regulation of cell cycle process	73/1773	359/18862	1.7286e-10	4.10021e-09	3.03525e-09	4849/79577/4682/10498/5711/581/5721/9183/5683/5714/546/8260/5713/5716/8454/5931/10197/4361/6241/5690/9491/8883/51143/5573/5720/10213/5710/23019/5695/7756/4282/5684/55031/5704/5702/9861/5694/5706/5718/5691/5700/5692/5709/2273/5705/5685/5719/5689/6500/5686/6118/5707/5682/5717/5688/7175/5693/5687/10432/5708/5701/9184/23468/11335/9349/9555/3276/5928/8091/5111/811/5591/4869	73
GO:0032956	BP	GO:0032956	regulation of actin cytoskeleton organization	72/1773	352/18862	1.74565e-10	4.12289e-09	3.05203e-09	1020/388/5921/57175/57482/5058/2314/23191/2909/4089/2885/4035/10391/1073/11344/5756/23122/382/10093/10094/822/10788/81553/23332/29767/23580/55704/10092/10152/1398/2764/120/7082/119/1496/28988/4192/26999/29085/11151/23406/136319/10552/5962/51571/2017/10109/10787/5217/830/10097/5879/6712/6422/8826/387/11034/118/10096/9948/829/832/5062/375/396/6711/335/1627/6624/7114/2316/71	72
GO:0032273	BP	GO:0032273	positive regulation of protein polymerization	38/1773	132/18862	1.89778e-10	4.46304e-09	3.30384e-09	10142/57175/57482/5058/23191/4204/2885/382/4733/10093/10094/10788/23332/23580/10092/10152/2764/1496/11151/10552/2017/10109/10787/5217/9793/10097/5879/4137/10096/22919/375/1639/6188/4926/3320/3303/3304/4131	38
GO:0009185	BP	GO:0009185	ribonucleoside diphosphate metabolic process	39/1773	138/18862	2.01593e-10	4.72071e-09	3.49458e-09	131870/23279/5571/51727/2584/5214/23165/348995/23636/55746/81929/283209/8473/79902/28964/4927/204/8021/8573/9631/8480/23225/3692/4967/6396/9688/11164/203/230/7175/5236/5213/5211/5223/226/3939/5230/7167/5315	39
GO:0021762	BP	GO:0021762	substantia nigra development	20/1773	43/18862	3.00479e-10	7.00651e-09	5.18668e-09	7707/2539/57447/4722/1267/1340/522/8655/515/387/2746/7533/3309/10971/801/805/808/10409/7531/1152	20
GO:0034508	BP	GO:0034508	centromere complex assembly	23/1773	56/18862	3.11037e-10	7.2221e-09	5.34628e-09	5931/51773/23126/8467/8607/201161/5928/4678/4869/8294/8359/8360/8361/8362/8363/8364/8365/8366/8367/8368/8370/121504/554313	23
GO:1901879	BP	GO:1901879	regulation of protein depolymerization	29/1773	85/18862	3.20057e-10	7.40031e-09	5.4782e-09	57482/10013/4130/55201/2314/1073/11344/50810/5756/23122/822/23332/29767/9181/120/119/136319/5962/830/6712/11034/118/9948/829/11075/832/6711/10763/4131	29
GO:0006446	BP	GO:0006446	regulation of translational initiation	28/1773	80/18862	3.27416e-10	7.53878e-09	5.5807e-09	8893/9669/5610/10605/1967/4686/51441/1982/23367/10959/1983/5936/1965/8667/8662/27335/1974/7812/7458/3646/23521/1975/1981/5499/7175/1653/3315/4869	28
GO:0051494	BP	GO:0051494	negative regulation of cytoskeleton organization	42/1773	158/18862	3.38415e-10	7.75956e-09	5.74414e-09	57175/57482/4682/10013/2314/4089/10391/11344/50810/5756/23122/822/23332/29767/9181/2764/120/7082/119/6904/1496/11151/136319/5962/51571/10382/5217/830/6712/10432/118/829/2288/11075/832/5062/22919/6711/4869/4133/7114/4131	42
GO:0042180	BP	GO:0042180	cellular ketone metabolic process	57/1773	254/18862	3.7109e-10	8.47347e-09	6.27262e-09	4704/4836/5711/3029/55198/5721/5683/5714/5713/5716/10197/207/5690/56267/9491/5720/10213/3692/11160/5710/5695/5684/2739/5704/5702/9861/5694/2820/5706/5718/5691/5700/5692/5709/5705/5685/5719/5019/5689/301/5686/5707/5682/2806/5717/5688/3028/5693/5687/5708/5701/231/10327/2171/11315/335/7167	57
GO:0009266	BP	GO:0009266	response to temperature stimulus	53/1773	228/18862	3.97738e-10	9.04444e-09	6.69529e-09	8891/23279/8893/10016/23165/55198/348995/23636/55746/81929/79902/5931/1967/4927/207/8021/26973/9631/6648/7266/8480/1153/3281/23225/1965/10294/3301/3337/6119/6396/9688/2932/4513/5594/10728/6118/6647/57805/7175/4137/11168/6117/3066/2288/10808/488/7415/3320/3329/3303/3304/7531/3312	53
GO:1901988	BP	GO:1901988	negative regulation of cell cycle phase transition	59/1773	268/18862	4.05808e-10	9.18996e-09	6.80301e-09	4849/79577/10498/5711/581/5721/9183/5683/5714/5713/5716/8454/10197/4361/5690/9491/8883/51143/5720/10213/5710/23019/5695/7756/5684/55031/5704/5702/9861/5694/5706/5718/5691/5700/5692/5709/2273/5705/5685/5719/5689/6500/5686/6118/5707/5682/5717/5688/7175/5693/5687/5708/5701/9184/9555/3276/8091/5111/5591	59
GO:0031497	BP	GO:0031497	chromatin assembly	48/1773	196/18862	4.09354e-10	9.23228e-09	6.83434e-09	1788/54623/3065/53615/546/23347/5931/51773/1786/10541/3024/9733/8520/8467/8607/7175/201161/3005/55506/50809/9555/6418/5928/4676/8091/4673/4171/8971/3148/4678/4869/10155/3009/3146/8294/8359/8360/8361/8362/8363/8364/8365/8366/8367/8368/8370/121504/554313	48
GO:0006338	BP	GO:0006338	chromatin remodeling	50/1773	209/18862	4.28694e-10	9.62899e-09	7.12801e-09	1107/1788/6594/3065/53615/546/5058/55193/23347/5931/51773/6599/9031/6605/81611/7150/6598/1786/8289/11164/6597/6601/9219/86/8467/8607/7175/201161/10856/3066/11335/5928/8091/4678/4869/10155/8294/8359/8360/8361/8362/8363/8364/8365/8366/8367/8368/8370/121504/554313	50
GO:0043039	BP	GO:0043039	tRNA aminoacylation	21/1773	48/18862	4.46517e-10	9.98854e-09	7.39418e-09	80755/7453/833/5859/8565/4141/10056/2193/9255/3376/2617/5917/51520/3735/6897/2058/7407/6301/16/1615/5464	21
GO:0034976	BP	GO:0034976	response to endoplasmic reticulum stress	63/1773	296/18862	4.50798e-10	1.00435e-08	7.43485e-09	8893/51060/55738/5770/9114/55666/23376/79876/2931/23197/51726/581/439/201595/23190/23071/7917/4976/81542/10134/7873/10211/10987/10959/9131/29978/29979/1965/9217/1191/10952/11160/3093/22872/9097/51569/2932/51035/10961/6449/56886/5706/23435/1981/10525/118/3068/488/1639/7094/821/10130/5034/9601/10399/2923/11315/7415/7184/811/3309/1938/3303	63
GO:0006335	BP	GO:0006335	DNA replication-dependent nucleosome assembly	17/1773	32/18862	4.63891e-10	1.02522e-08	7.58934e-09	8520/5928/4678/8294/8359/8360/8361/8362/8363/8364/8365/8366/8367/8368/8370/121504/554313	17
GO:0034723	BP	GO:0034723	DNA replication-dependent nucleosome organization	17/1773	32/18862	4.63891e-10	1.02522e-08	7.58934e-09	8520/5928/4678/8294/8359/8360/8361/8362/8363/8364/8365/8366/8367/8368/8370/121504/554313	17
GO:0006164	BP	GO:0006164	purine nucleotide biosynthetic process	48/1773	197/18862	4.92657e-10	1.08012e-08	7.99573e-09	79966/79877/84532/9061/8604/5636/55229/10165/158/6576/3251/204/51144/9524/1737/30968/5471/1738/5160/5162/10632/8833/5198/203/4513/523/509/10476/522/471/38/2618/539/515/47/3615/11332/4830/10606/4522/142/2194/498/7415/226/506/7114/5315	48
GO:0016052	BP	GO:0016052	carbohydrate catabolic process	48/1773	197/18862	4.92657e-10	1.08012e-08	7.99573e-09	23279/5571/178/26007/2931/8604/2584/5214/23165/348995/23636/55347/55746/81929/283209/8473/950/79902/28964/4927/8021/9631/8480/6652/23225/55276/3692/5500/4967/6396/9688/11164/230/2820/5499/7175/5236/5213/5211/5226/5223/226/3939/5230/7167/801/3146/5315	48
GO:0072655	BP	GO:0072655	establishment of protein localization to mitochondrion	39/1773	142/18862	5.08601e-10	1.11065e-08	8.22174e-09	51100/51079/55750/51024/4836/25813/2931/54332/9512/581/10452/9049/10469/56993/92609/1459/207/10134/9131/7332/3301/9868/293/9141/10055/4137/10075/9520/7533/7529/3308/3320/3329/7532/10971/801/808/7531/7534	39
GO:0075522	BP	GO:0075522	IRES-dependent viral translational initiation	10/1773	11/18862	5.29675e-10	1.14851e-08	8.50203e-09	28985/8665/8562/8662/7812/8664/8661/5094/6741/5725	10
GO:0016236	BP	GO:0016236	macroautophagy	65/1773	311/18862	5.30114e-10	1.14851e-08	8.50203e-09	1020/23265/51382/149371/28956/51100/5571/22930/9114/5868/60412/528/23376/112936/79876/8027/10013/23192/10452/823/51606/56993/7251/25782/26086/9559/6009/1459/207/529/2773/23367/826/29978/29979/9373/9146/81631/8396/6829/51160/1457/23673/5049/81876/1460/23256/51569/140735/51534/56893/523/9868/526/11140/9554/11331/55737/55968/8655/10075/7879/7416/7415/7345	65
GO:0010499	BP	GO:0010499	proteasomal ubiquitin-independent protein catabolic process	14/1773	22/18862	6.19582e-10	1.33708e-08	9.89797e-09	5683/5690/5695/5684/5694/5691/5692/5685/5689/5686/5682/5688/5693/5687	14
GO:1902850	BP	GO:1902850	microtubule cytoskeleton organization involved in mitosis	39/1773	143/18862	6.36705e-10	1.36867e-08	1.01318e-08	25777/79187/5524/23636/9183/7283/4204/51119/23122/4733/23332/8480/2009/51510/6993/7756/3688/1104/9793/55968/8243/7175/10726/387/9126/10540/5048/1639/4134/3837/7415/4926/1213/5901/3303/3304/1778/3192/2316	39
GO:0043244	BP	GO:0043244	regulation of protein-containing complex disassembly	35/1773	120/18862	6.63779e-10	1.42035e-08	1.05143e-08	10269/57482/10013/4130/55201/2314/1073/11344/50810/5756/23122/2935/822/23332/29767/2107/9181/5976/120/119/136319/56893/5962/830/6712/11034/118/9948/829/11075/832/1984/6711/10763/4131	35
GO:1903362	BP	GO:1903362	regulation of cellular protein catabolic process	56/1773	251/18862	6.65909e-10	1.42035e-08	1.05143e-08	975/23376/2931/7337/6386/5721/57095/8473/4130/7917/2876/23640/5716/4035/10197/1459/207/10134/6599/29978/29979/9491/5720/10213/1191/8667/1457/3093/6923/9097/2932/51035/6449/5704/5702/56893/7874/5962/5700/55737/6201/57805/7514/5701/6135/4478/9349/6125/302/10399/11315/7415/3320/7430/3303/3304	56
GO:0043038	BP	GO:0043038	amino acid activation	21/1773	49/18862	7.12371e-10	1.51358e-08	1.12045e-08	80755/7453/833/5859/8565/4141/10056/2193/9255/3376/2617/5917/51520/3735/6897/2058/7407/6301/16/1615/5464	21
GO:0006165	BP	GO:0006165	nucleoside diphosphate phosphorylation	37/1773	132/18862	7.52137e-10	1.59193e-08	1.17845e-08	23279/5571/1841/51727/2584/5214/23165/348995/23636/55746/81929/283209/8473/79902/28964/4927/8021/9631/8480/23225/3692/4967/6396/9688/203/230/7175/5236/5213/5211/4830/5223/226/3939/5230/7167/5315	37
GO:0035966	BP	GO:0035966	response to topologically incorrect protein	49/1773	206/18862	7.88684e-10	1.66288e-08	1.23098e-08	22824/55738/5770/9114/23376/2931/10013/23197/51726/581/439/201595/23190/23071/7917/7873/10987/10959/1965/9217/1191/3301/3337/8452/22872/56886/10525/3336/118/3068/10808/1639/7094/821/871/10130/3313/3315/10399/3308/7415/7184/3320/811/3309/3329/3303/3304/3312	49
GO:0009132	BP	GO:0009132	nucleoside diphosphate metabolic process	41/1773	156/18862	7.95527e-10	1.66507e-08	1.23259e-08	131870/23279/5571/1841/51727/2584/5214/23165/348995/23636/55746/81929/283209/8473/79902/28964/4927/204/8021/8573/9631/8480/23225/3692/4967/6396/9688/11164/203/230/7175/5236/5213/5211/4830/5223/226/3939/5230/7167/5315	41
GO:0032984	BP	GO:0032984	protein-containing complex disassembly	67/1773	328/18862	7.95771e-10	1.66507e-08	1.23259e-08	10269/64780/57482/84687/10013/63908/4130/55201/2314/7251/1073/11344/50810/5756/23122/9798/2935/6599/822/84305/23332/29767/29979/6605/81631/2107/9181/51510/6598/6059/327/5976/120/8289/119/6455/2932/4905/6597/51534/136319/56893/5962/6601/9793/830/8775/5499/6712/3799/11034/118/9948/829/11075/832/9349/11198/6418/1984/6711/7415/51504/1072/10763/4131/3312	67
GO:0022406	BP	GO:0022406	membrane docking	45/1773	181/18862	8.52619e-10	1.77726e-08	1.31564e-08	9482/10142/95681/23233/11311/10652/60412/4218/7283/112755/23344/11258/6616/5577/6857/23332/8417/9217/23673/23256/10890/8724/4905/6812/8615/10382/1781/9793/1488/8655/10121/7879/4478/22919/10540/5048/1639/5518/3320/7430/7532/1778/203068/10383/7531	45
GO:0033044	BP	GO:0033044	regulation of chromosome organization	59/1773	273/18862	8.65148e-10	1.79657e-08	1.32994e-08	408/11143/54623/5394/55226/22938/1736/9183/54386/546/8473/8260/4204/4089/23168/4361/84656/80349/25942/51143/23028/7153/6598/1786/5976/8452/9733/7756/1487/6742/56252/7874/5594/26097/7175/201161/4137/10856/9184/7334/9555/22948/7520/10574/10575/4171/6950/7203/3184/142/10576/6421/3178/4926/10694/10155/3009/3192/3181	59
GO:0051031	BP	GO:0051031	tRNA transport	18/1773	37/18862	9.3086e-10	1.92576e-08	1.42557e-08	23279/11260/23165/348995/23636/55746/81929/79902/4927/8021/9631/8480/23225/6396/9688/7175/6741/5901	18
GO:0051495	BP	GO:0051495	positive regulation of cytoskeleton organization	51/1773	220/18862	9.39862e-10	1.9371e-08	1.43397e-08	1020/10142/57175/57482/23636/5058/23191/4204/2885/1073/382/4733/10093/10094/10788/23332/23580/55704/10092/10152/2764/5202/1496/11151/10552/2017/10109/10787/5217/9793/10097/5879/6422/387/4137/11034/10096/9948/11075/22919/375/1639/6188/4926/335/3303/3304/1778/2316/10763/4131	51
GO:0046939	BP	GO:0046939	nucleotide phosphorylation	37/1773	133/18862	9.4879e-10	1.94821e-08	1.44219e-08	23279/5571/1841/51727/2584/5214/23165/348995/23636/55746/81929/283209/8473/79902/28964/4927/8021/9631/8480/23225/3692/4967/6396/9688/203/230/7175/5236/5213/5211/4830/5223/226/3939/5230/7167/5315	37
GO:0046031	BP	GO:0046031	ADP metabolic process	35/1773	122/18862	1.08594e-09	2.22154e-08	1.64453e-08	23279/5571/2584/5214/23165/348995/23636/55746/81929/283209/8473/79902/28964/4927/204/8021/9631/8480/23225/3692/4967/6396/9688/203/230/7175/5236/5213/5211/5223/226/3939/5230/7167/5315	35
GO:0032970	BP	GO:0032970	regulation of actin filament-based process	75/1773	389/18862	1.23629e-09	2.51974e-08	1.86528e-08	1020/388/10142/5921/57175/57482/5058/2314/23191/2909/4089/2885/4035/10391/1073/11344/5756/23122/382/10093/10094/822/10788/81553/23332/29767/23580/55704/10092/10152/1398/2764/120/7082/119/1496/28988/4192/26999/29085/11151/23406/136319/6717/10552/5962/51571/2017/10109/10787/5217/830/10097/5879/6712/6422/8826/387/11034/118/10096/9948/829/832/5062/375/488/396/6711/335/1627/6624/7114/2316/71	75
GO:1902905	BP	GO:1902905	positive regulation of supramolecular fiber organization	48/1773	203/18862	1.44777e-09	2.93988e-08	2.17629e-08	10142/57175/57482/5058/23191/2876/4204/2885/1073/382/4733/10093/10094/10788/23332/23580/55704/10092/10152/1191/2764/1496/11151/10552/2017/10109/10787/5217/9793/10097/5879/6422/387/4137/11034/10096/9948/11075/22919/375/1639/6188/4926/335/3303/3304/2316/4131	48
GO:0009135	BP	GO:0009135	purine nucleoside diphosphate metabolic process	37/1773	135/18862	1.49694e-09	3.01746e-08	2.23373e-08	131870/23279/5571/2584/5214/23165/348995/23636/55746/81929/283209/8473/79902/28964/4927/204/8021/8573/9631/8480/23225/3692/4967/6396/9688/203/230/7175/5236/5213/5211/5223/226/3939/5230/7167/5315	37
GO:0009179	BP	GO:0009179	purine ribonucleoside diphosphate metabolic process	37/1773	135/18862	1.49694e-09	3.01746e-08	2.23373e-08	131870/23279/5571/2584/5214/23165/348995/23636/55746/81929/283209/8473/79902/28964/4927/204/8021/8573/9631/8480/23225/3692/4967/6396/9688/203/230/7175/5236/5213/5211/5223/226/3939/5230/7167/5315	37
GO:0007052	BP	GO:0007052	mitotic spindle organization	34/1773	118/18862	1.6514e-09	3.31666e-08	2.45521e-08	25777/79187/5524/23636/7283/4204/51119/23122/4733/23332/8480/2009/51510/7756/1104/9793/8243/7175/10726/387/9126/10540/1639/4134/3837/7415/4926/1213/5901/3303/3304/1778/3192/2316	34
GO:0050821	BP	GO:0050821	protein stabilization	46/1773	191/18862	1.68595e-09	3.37374e-08	2.49747e-08	22848/2319/7917/10211/80155/481/23011/5300/3092/483/1191/8575/23673/7756/10910/6812/11140/7874/10728/5217/11331/1500/6201/5245/6135/336/9349/5479/22948/6125/10574/10575/6950/7203/57142/10576/11315/335/3320/811/10694/3329/3303/3304/3009/2316	46
GO:0010565	BP	GO:0010565	regulation of cellular ketone metabolic process	45/1773	185/18862	1.80432e-09	3.5953e-08	2.66148e-08	5711/55198/5721/5683/5714/5713/5716/10197/207/5690/9491/5720/10213/3692/11160/5710/5695/5684/5704/5702/9861/5694/5706/5718/5691/5700/5692/5709/5705/5685/5719/5689/301/5686/5707/5682/5717/5688/5693/5687/5708/5701/2171/11315/335	45
GO:2001242	BP	GO:2001242	regulation of intrinsic apoptotic signaling pathway	41/1773	160/18862	1.80974e-09	3.5953e-08	2.66148e-08	51060/51079/5770/51024/3065/581/2876/4976/207/10134/6648/29979/23028/9181/1191/4722/8575/3301/4282/55031/10059/10131/10961/9774/7178/10525/6647/6201/57805/6135/7417/5034/3315/10399/142/6188/6421/11315/4841/3303/3190	41
GO:0007409	BP	GO:0007409	axonogenesis	84/1773	460/18862	1.97116e-09	3.90189e-08	2.88844e-08	1020/5786/57611/1948/7204/4756/5532/10013/23114/4218/4130/55201/5362/5058/5604/23191/57698/2909/4089/8301/4897/2885/4035/113246/11344/1630/25942/10211/10939/9798/23011/1982/11313/3897/51062/5781/64919/1267/1785/23654/10890/1496/4781/55740/9201/28988/2932/3996/6812/5335/2017/1947/5594/6152/682/22902/5879/6712/3799/387/4137/2817/5062/23499/7414/5048/7155/396/57142/4684/2596/6711/2335/3320/7430/1627…	84
GO:1904951	BP	GO:1904951	positive regulation of establishment of protein localization	66/1773	328/18862	2.03025e-09	4.00446e-08	2.96437e-08	1020/975/9747/51100/7447/5532/51024/8882/57506/4836/10972/2931/25930/1736/399687/5058/7251/4035/10391/1459/10134/382/10204/7332/10541/51160/2010/10059/2932/29085/2244/6717/9141/5594/23435/5019/22902/2266/5879/10055/3799/8655/7175/10075/9520/2746/375/22948/3843/10574/10575/7533/10399/7529/6950/7203/10576/10694/7430/5901/7532/10971/10155/2316/7531/7534	66
GO:0009144	BP	GO:0009144	purine nucleoside triphosphate metabolic process	28/1773	86/18862	2.17369e-09	4.27209e-08	3.16248e-08	131870/25939/79631/8604/10165/4976/9567/4521/2773/30968/10632/4513/523/509/10476/522/539/515/3615/4830/142/498/7415/226/5901/506/7114/5315	28
GO:0006289	BP	GO:0006289	nucleotide-excision repair	32/1773	108/18862	2.30006e-09	4.50436e-08	3.33443e-08	11143/8450/3978/5434/5432/9318/64708/5430/8451/2873/5984/5437/5982/5424/3980/10987/10920/10980/51138/8533/6119/5431/3150/7874/6118/6117/1642/27339/5111/142/3146/6233	32
GO:0032388	BP	GO:0032388	positive regulation of intracellular transport	50/1773	219/18862	2.38019e-09	4.64474e-08	3.43834e-08	1020/975/9747/51100/80055/51024/8882/57506/4836/2931/25930/5058/6342/1459/10134/23011/10204/7332/10541/2010/11052/2932/9141/5962/5594/23435/22902/10055/3799/7175/10075/9520/4478/375/3843/302/7533/7529/4926/7430/1660/5901/7532/10971/10155/4133/1778/2316/7531/7534	50
GO:0060828	BP	GO:0060828	regulation of canonical Wnt signaling pathway	60/1773	287/18862	2.41185e-09	4.68989e-08	3.47177e-08	55681/3611/2931/5711/3065/5721/5683/5714/5713/3485/5716/5495/10197/219287/5300/79718/5690/9491/3836/5720/10213/2010/5710/8452/5695/5204/5684/55031/2932/4192/5704/5702/9861/5694/5706/5718/5691/5700/5692/5709/5705/5685/5719/5689/5686/5499/1500/8607/5707/5682/5717/5688/57805/6422/5693/5687/5708/5701/10856/7415	60
GO:0070555	BP	GO:0070555	response to interleukin-1	48/1773	206/18862	2.43106e-09	4.71061e-08	3.48711e-08	5711/23236/5721/5683/5714/5713/5716/8454/10197/9100/5690/9491/5720/10213/5976/5710/5695/5684/2244/5704/5702/9861/5694/5706/5718/5691/5700/5692/5709/5705/5685/5719/5689/301/6500/5686/5707/5682/5717/5688/6422/5693/5687/5708/5701/7334/9590/6233	48
GO:0006096	BP	GO:0006096	glycolytic process	33/1773	114/18862	2.50915e-09	4.84487e-08	3.58649e-08	23279/5571/2584/5214/23165/348995/23636/55746/81929/283209/8473/79902/28964/4927/8021/9631/8480/23225/3692/4967/6396/9688/230/7175/5236/5213/5211/5223/226/3939/5230/7167/5315	33
GO:0031647	BP	GO:0031647	regulation of protein stability	61/1773	295/18862	2.77519e-09	5.33982e-08	3.95289e-08	975/51100/22848/79577/2319/10013/8805/7917/10211/80155/481/23011/5300/3092/4047/483/1191/8575/23673/8452/7756/10910/55031/6812/23327/11140/7874/5594/10728/23435/5217/11331/55737/1500/6201/57805/5245/6135/336/9349/5479/22948/6125/10574/10575/6950/7203/57142/10576/11315/335/3320/811/10694/5591/3329/3303/3304/3009/2316/3312	61
GO:0006900	BP	GO:0006900	vesicle budding from membrane	32/1773	109/18862	2.96542e-09	5.68595e-08	4.20912e-08	5537/26052/10016/9892/10972/399687/8943/8301/55291/10959/54874/51510/9217/9632/1785/81876/23256/8452/22872/8724/1173/6396/10484/4905/8615/10342/9554/8775/9218/7879/375/302	32
GO:0006302	BP	GO:0006302	double-strand break repair	57/1773	268/18862	3.10875e-09	5.94008e-08	4.39724e-08	131870/25939/57599/84309/9320/5531/54386/23347/4361/5965/3980/151987/64710/23028/10213/9112/6119/56893/4436/10097/6118/7913/6117/55611/7158/1653/7334/4174/4176/27339/7520/8091/4175/4172/2521/4171/142/3148/6421/2547/7415/5591/3146/8294/8359/8360/8361/8362/8363/8364/8365/8366/8367/8368/8370/121504/554313	57
GO:0006757	BP	GO:0006757	ATP generation from ADP	33/1773	115/18862	3.20478e-09	6.10239e-08	4.51739e-08	23279/5571/2584/5214/23165/348995/23636/55746/81929/283209/8473/79902/28964/4927/8021/9631/8480/23225/3692/4967/6396/9688/230/7175/5236/5213/5211/5223/226/3939/5230/7167/5315	33
GO:0046785	BP	GO:0046785	microtubule polymerization	26/1773	77/18862	3.36956e-09	6.39403e-08	4.73328e-08	58497/10142/22924/7283/5058/4204/50810/23122/4733/23332/7756/6904/10382/9793/5879/4137/2288/11075/22919/1639/6188/4926/3303/3304/4133/4131	26
GO:0031349	BP	GO:0031349	positive regulation of defense response	70/1773	361/18862	3.43073e-09	6.48774e-08	4.80265e-08	975/57506/85364/5711/5721/5683/5714/5058/1652/5713/5716/8454/10197/23705/25942/5690/9491/164/5720/10213/27250/183/3093/5710/5695/5684/5567/3673/4192/5704/5702/9868/9861/5694/5706/5718/5691/5700/5692/5709/3735/5705/5685/5719/5689/6500/5686/5707/5682/5717/55269/5688/5693/5687/10432/5708/5701/5062/6223/7520/3148/6421/11315/2547/9782/3320/1660/5591/4841/3146	70
GO:0045727	BP	GO:0045727	positive regulation of translation	36/1773	133/18862	3.58665e-09	6.75936e-08	5.00373e-08	8893/9513/55226/10605/8087/51441/1982/23367/84305/1153/3692/23654/708/84271/3673/8664/3646/5594/8663/1981/7555/1968/6203/1994/6156/9775/7919/6125/1984/3184/1660/5591/4869/1938/5315/7431	36
GO:0010975	BP	GO:0010975	regulation of neuron projection development	79/1773	428/18862	3.62066e-09	6.80016e-08	5.03393e-08	1020/23413/57611/1948/26052/57118/10498/2931/7337/23098/5362/5058/950/5604/23191/112755/4976/57698/2909/4035/207/11344/53335/1630/5756/382/9798/23011/1982/1272/6616/8175/5792/3897/23028/55704/10152/6993/1398/23654/5764/8724/1496/221914/10059/28988/2932/4192/23327/160/1399/22902/10097/6422/8826/387/4137/3066/4076/4830/2288/11075/5062/23499/396/3956/7533/57142/2335/3309/1627/2664/4133/1809/2316/140…	79
GO:2001252	BP	GO:2001252	positive regulation of chromosome organization	41/1773	164/18862	3.97878e-09	7.44736e-08	5.51302e-08	408/11143/54623/22938/1736/546/8473/4204/4089/23168/4361/84656/80349/25942/23028/6598/1786/9733/1487/6742/5594/26097/7175/10856/7334/9555/22948/7520/10574/10575/6950/7203/3184/10576/6421/3178/4926/10694/10155/3009/3181	41
GO:0043486	BP	GO:0043486	histone exchange	22/1773	58/18862	4.52349e-09	8.43822e-08	6.24653e-08	5931/51773/81611/8467/8607/5928/4678/4869/8294/8359/8360/8361/8362/8363/8364/8365/8366/8367/8368/8370/121504/554313	22
GO:0032272	BP	GO:0032272	negative regulation of protein polymerization	26/1773	78/18862	4.60546e-09	8.56211e-08	6.33824e-08	57482/2314/11344/5756/822/29767/120/119/6904/136319/5962/51571/10382/5217/830/6712/118/829/2288/7417/11075/832/22919/6711/4133/7114	26
GO:1904874	BP	GO:1904874	positive regulation of telomerase RNA localization to Cajal body	11/1773	15/18862	4.69648e-09	8.70193e-08	6.44174e-08	55651/1736/8607/10856/22948/10574/10575/6950/7203/10576/10694	11
GO:1904872	BP	GO:1904872	regulation of telomerase RNA localization to Cajal body	12/1773	18/18862	4.97472e-09	9.18653e-08	6.80048e-08	5394/55651/1736/8607/10856/22948/10574/10575/6950/7203/10576/10694	12
GO:0030111	BP	GO:0030111	regulation of Wnt signaling pathway	70/1773	365/18862	5.53844e-09	1.01933e-07	7.54577e-08	55681/79577/3611/64359/2931/5711/3065/5721/5683/5714/5713/3485/5716/5495/4035/10197/219287/5300/79718/5690/9491/3836/5720/10213/1457/2010/5710/8452/5695/8724/5204/5684/55031/2932/4192/6597/5704/5702/9861/5694/5706/5718/5691/5700/5692/5709/5705/5685/5719/5689/5515/5686/5499/1500/8607/5707/5682/5717/5688/57805/6422/5693/5687/5708/5701/10856/23499/10399/5518/7415	70
GO:0006986	BP	GO:0006986	response to unfolded protein	44/1773	185/18862	5.71936e-09	1.04912e-07	7.7663e-08	22824/55738/5770/9114/23376/2931/23197/51726/581/439/201595/23190/23071/7873/10987/10959/1965/9217/3301/3337/22872/10525/3336/118/3068/10808/1639/7094/821/871/10130/3313/3315/10399/3308/7415/7184/3320/811/3309/3329/3303/3304/3312	44
GO:0031346	BP	GO:0031346	positive regulation of cell projection organization	67/1773	344/18862	6.16107e-09	1.12639e-07	8.3383e-08	57611/57175/26052/57118/25940/5362/5058/950/5604/23191/4976/57698/2909/4035/375790/11344/5756/9798/23011/1982/1272/54874/8175/3897/23580/23028/55704/10152/6993/1785/23654/5764/8724/221914/10059/5898/3673/28988/4192/160/10109/10787/22902/10097/5879/8655/23603/8826/387/4137/10096/10801/4076/4830/2823/11075/23499/989/396/2335/3309/1627/2664/6624/1809/2316/4131	67
GO:0030042	BP	GO:0030042	actin filament depolymerization	22/1773	59/18862	6.57563e-09	1.19455e-07	8.84288e-08	64780/57482/84687/2314/1073/11344/5756/822/29767/120/119/136319/5962/830/6712/11034/118/9948/829/832/6711/1072	22
GO:0033119	BP	GO:0033119	negative regulation of RNA splicing	14/1773	25/18862	6.57732e-09	1.19455e-07	8.84288e-08	10921/8241/10284/708/6431/8683/6432/6231/11338/58155/6207/5725/3190/3181	14
GO:0031116	BP	GO:0031116	positive regulation of microtubule polymerization	15/1773	29/18862	8.09055e-09	1.46455e-07	1.08416e-07	10142/5058/4204/4733/23332/9793/5879/4137/22919/1639/6188/4926/3303/3304/4131	15
GO:1902115	BP	GO:1902115	regulation of organelle assembly	44/1773	187/18862	8.11944e-09	1.46496e-07	1.08446e-07	51100/22930/5868/8027/6386/23636/7251/25782/2909/4089/4733/29978/55704/51510/8396/11273/9908/1785/10146/81876/23256/23019/1104/7419/5962/9554/10015/8655/7175/10432/10801/4478/23224/4134/989/2596/4926/7430/4869/6624/3303/3304/1778/3192	44
GO:0033120	BP	GO:0033120	positive regulation of RNA splicing	17/1773	37/18862	8.2469e-09	1.48309e-07	1.09788e-07	8882/22938/6430/5430/26528/4686/1153/92906/6625/9967/6434/11338/9588/27339/4691/3303/3312	17
GO:0070828	BP	GO:0070828	heterochromatin organization	26/1773	80/18862	8.44416e-09	1.51362e-07	1.12048e-07	1788/3065/53615/23347/1786/8467/7175/201161/3066/50809/8091/10155/8294/8359/8360/8361/8362/8363/8364/8365/8366/8367/8368/8370/121504/554313	26
GO:0031112	BP	GO:0031112	positive regulation of microtubule polymerization or depolymerization	16/1773	33/18862	8.5882e-09	1.53444e-07	1.1359e-07	10142/5058/4204/4733/23332/9793/5879/4137/11075/22919/1639/6188/4926/3303/3304/4131	16
GO:0048524	BP	GO:0048524	positive regulation of viral process	28/1773	91/18862	9.0259e-09	1.60743e-07	1.18992e-07	7469/5091/5434/5586/25920/5432/51497/5430/7251/2962/5437/51773/6780/23367/7153/9217/6829/103/5431/3838/51495/9218/1642/7879/7155/5034/3956/1660	28
GO:0072583	BP	GO:0072583	clathrin-dependent endocytosis	19/1773	46/18862	9.70836e-09	1.72339e-07	1.27577e-07	55681/60682/22848/6456/1175/9892/1212/8301/54874/3092/29978/1211/1785/1173/160/161/163/821/1213	19
GO:0032392	BP	GO:0032392	DNA geometric change	32/1773	114/18862	1e-08	1.76946e-07	1.30987e-07	1107/8450/6594/546/8451/5984/4361/5965/5982/7153/10146/6742/301/8607/6117/1642/10856/1653/3149/4174/4176/7520/4175/4172/4171/142/3148/2547/1660/3146/6233/3181	32
GO:0007051	BP	GO:0007051	spindle organization	43/1773	182/18862	1.0497e-08	1.85145e-07	1.37057e-07	1107/25777/79187/5524/22924/23636/546/7283/10982/4204/51119/23122/4733/23332/8480/2009/51510/7756/1104/347688/9793/8243/7175/10726/387/9126/22919/10540/1639/4134/3837/6188/7415/4926/7430/1213/5901/3303/3304/1778/3192/2316/203068	43
GO:1903050	BP	GO:1903050	regulation of proteolysis involved in cellular protein catabolic process	48/1773	215/18862	1.06539e-08	1.8731e-07	1.3866e-07	23376/2931/7337/6386/5721/57095/8473/4130/7917/2876/23640/5716/10197/1459/207/10134/6599/29978/29979/9491/5720/10213/1191/8667/1457/3093/6923/9097/2932/51035/6449/5704/5702/56893/7874/5700/6201/57805/7514/5701/6135/9349/6125/10399/11315/7415/3303/3304	48
GO:0034250	BP	GO:0034250	positive regulation of cellular amide metabolic process	40/1773	163/18862	1.08431e-08	1.9003e-07	1.40673e-07	8893/9513/2931/55226/10605/8301/8087/51441/1982/23367/84305/1153/1191/3692/23654/708/84271/3673/8664/3646/5594/8663/1981/7555/1968/6203/1994/6156/9775/7919/6125/1984/10399/3184/1660/5591/4869/1938/5315/7431	40
GO:0046395	BP	GO:0046395	carboxylic acid catabolic process	52/1773	243/18862	1.21758e-08	2.12709e-07	1.57461e-07	51/10455/26275/30/3033/7915/5825/18/1666/5096/2752/55577/6342/5095/207/4329/642/1743/224/6652/2109/3032/51181/4967/5471/1891/1632/3295/10007/1738/2805/10449/1892/80150/2108/5860/875/102724560/6472/1381/38/39/23576/2806/3028/3030/10327/2746/501/5226/191/23564	52
GO:0090670	BP	GO:0090670	RNA localization to Cajal body	12/1773	19/18862	1.23421e-08	2.12911e-07	1.5761e-07	5394/55651/1736/8607/10856/22948/10574/10575/6950/7203/10576/10694	12
GO:0090671	BP	GO:0090671	telomerase RNA localization to Cajal body	12/1773	19/18862	1.23421e-08	2.12911e-07	1.5761e-07	5394/55651/1736/8607/10856/22948/10574/10575/6950/7203/10576/10694	12
GO:0090672	BP	GO:0090672	telomerase RNA localization	12/1773	19/18862	1.23421e-08	2.12911e-07	1.5761e-07	5394/55651/1736/8607/10856/22948/10574/10575/6950/7203/10576/10694	12
GO:0090685	BP	GO:0090685	RNA localization to nucleus	12/1773	19/18862	1.23421e-08	2.12911e-07	1.5761e-07	5394/55651/1736/8607/10856/22948/10574/10575/6950/7203/10576/10694	12
GO:0006334	BP	GO:0006334	nucleosome assembly	37/1773	145/18862	1.24875e-08	2.14746e-07	1.58969e-07	546/5931/51773/10541/3024/9733/8520/8467/8607/3005/55506/50809/9555/6418/5928/4676/4673/4171/8971/3148/4678/4869/3009/8294/8359/8360/8361/8362/8363/8364/8365/8366/8367/8368/8370/121504/554313	37
GO:1990748	BP	GO:1990748	cellular detoxification	32/1773	115/18862	1.26199e-08	2.16347e-07	1.60154e-07	9446/64359/2876/2936/2879/1719/51780/847/2944/6648/84817/7296/2947/84293/23530/2098/2946/6647/10935/10549/25824/10327/9588/128/7295/2950/11315/7001/3050/3046/5052/3047	32
GO:0031507	BP	GO:0031507	heterochromatin assembly	24/1773	71/18862	1.31166e-08	2.24164e-07	1.65941e-07	1788/3065/53615/23347/1786/8467/7175/201161/8091/10155/8294/8359/8360/8361/8362/8363/8364/8365/8366/8367/8368/8370/121504/554313	24
GO:0009199	BP	GO:0009199	ribonucleoside triphosphate metabolic process	27/1773	87/18862	1.34758e-08	2.29589e-07	1.69957e-07	79631/8604/10165/4976/56474/9567/2773/30968/10632/1503/4513/523/509/10476/522/539/515/3615/4830/142/498/7415/226/5901/506/7114/5315	27
GO:0016054	BP	GO:0016054	organic acid catabolic process	54/1773	258/18862	1.44129e-08	2.44797e-07	1.81215e-07	586/51/10455/26275/30/3033/7915/5825/18/1666/5096/2752/55577/6342/5095/207/4357/4329/642/1743/224/6652/2109/3032/51181/4967/5471/1891/1632/3295/10007/1738/2805/10449/1892/80150/2108/5860/875/102724560/6472/1381/38/39/23576/2806/3028/3030/10327/2746/501/5226/191/23564	54
GO:0000387	BP	GO:0000387	spliceosomal snRNP assembly	20/1773	52/18862	1.71796e-08	2.9089e-07	2.15336e-07	9129/26121/6635/6631/6637/79084/9092/25929/6636/10419/9733/25804/57819/6634/6632/11171/24148/10594/6633/27339	20
GO:0140056	BP	GO:0140056	organelle localization by membrane tethering	41/1773	172/18862	1.74907e-08	2.9525e-07	2.18563e-07	9482/10142/95681/23233/11311/10652/60412/4218/7283/112755/23344/11258/6616/5577/6857/23332/8417/9217/23673/23256/10890/4905/6812/8615/10382/1781/9793/1488/8655/10121/22919/10540/5048/1639/5518/3320/7532/1778/203068/10383/7531	41
GO:0042273	BP	GO:0042273	ribosomal large subunit biogenesis	24/1773	72/18862	1.79325e-08	3.01782e-07	2.23399e-07	6169/22907/55759/55651/8886/4839/11224/26156/3692/9045/6128/4809/6165/6134/6152/4736/6135/6147/6122/6129/6125/6130/6175/4869	24
GO:0040029	BP	GO:0040029	regulation of gene expression, epigenetic	46/1773	205/18862	1.81728e-08	3.04893e-07	2.25702e-07	1788/5434/5394/2931/10013/9188/23347/2876/5931/4204/5437/25942/9031/1786/3024/5976/9112/8289/8520/1487/8467/3005/7913/55506/3066/9555/5928/23451/8971/3009/3192/3146/8294/8359/8360/8361/8362/8363/8364/8365/8366/8367/8368/8370/121504/554313	46
GO:0006979	BP	GO:0006979	response to oxidative stress	79/1773	444/18862	1.95847e-08	3.27582e-07	2.42498e-07	154807/388/3163/4728/54205/10013/7337/116988/57465/1718/29957/56616/2876/54936/55967/2936/2879/207/1719/2539/847/25942/4521/824/10550/4720/6780/6648/7296/29979/2937/1965/1398/8575/9361/1785/9943/10314/9124/5536/475/10131/50804/5594/6434/301/6647/10935/10549/5693/4137/2775/11168/328/25824/3066/9588/488/7295/9555/5034/2950/3417/5111/3315/10399/3184/142/6188/6421/11315/7001/4841/3939/1938/3303/3304/…	79
GO:0000715	BP	GO:0000715	nucleotide-excision repair, DNA damage recognition	13/1773	23/18862	1.98895e-08	3.31672e-07	2.45526e-07	8450/9318/64708/8451/2873/10987/10920/10980/51138/8533/1642/142/6233	13
GO:0034470	BP	GO:0034470	ncRNA processing	73/1773	400/18862	2.31178e-08	3.84342e-07	2.84515e-07	131870/54888/112858/57418/22894/5394/84267/55759/55651/8886/4839/55226/29894/9188/1736/51729/11224/11157/6229/5303/55623/27043/2091/26156/51119/22803/9092/1478/23517/51602/103/3692/8575/6209/9045/6234/4809/6232/51637/6165/10528/6230/3735/283742/6194/6217/6203/6155/6201/6227/3028/4736/6301/6218/51593/6135/51493/16/1653/5036/9775/6202/6741/6223/6129/6125/6187/6208/6130/10521/51504/5591/3181	73
GO:0097549	BP	GO:0097549	chromatin organization involved in negative regulation of transcription	36/1773	142/18862	2.34887e-08	3.89333e-07	2.8821e-07	1788/3065/53615/23347/4204/25942/1786/3024/8520/1487/8467/7175/201161/3005/55506/3066/9555/8091/8971/10155/3009/3146/8294/8359/8360/8361/8362/8363/8364/8365/8366/8367/8368/8370/121504/554313	36
GO:0097193	BP	GO:0097193	intrinsic apoptotic signaling pathway	57/1773	283/18862	2.43814e-08	4.02916e-07	2.98265e-07	51060/51079/5770/51024/22938/3065/581/8065/8453/8451/56616/7917/2876/4976/8454/207/10134/10550/6648/9131/29979/23028/9181/1191/4722/8575/3301/3093/8452/4282/3094/55031/10059/10131/10961/9774/7178/10525/4436/6647/6201/57805/2956/6135/7417/1655/5034/3315/10399/142/6188/6421/11315/5591/4841/3303/3190	57
GO:1903313	BP	GO:1903313	positive regulation of mRNA metabolic process	26/1773	84/18862	2.64793e-08	4.36274e-07	3.22959e-07	26058/79577/54623/22938/26528/4686/9567/51441/9698/10658/1153/79068/5976/23019/11051/6625/9967/6434/23435/9588/27339/8570/3184/4691/10236/3312	26
GO:0006606	BP	GO:0006606	protein import into nucleus	36/1773	143/18862	2.85872e-08	4.69598e-07	3.47628e-07	26953/26060/8882/57506/55198/23636/23534/55746/79902/4927/207/8021/9631/3839/10204/3836/3840/51569/6396/9688/3838/3842/5594/23435/11331/55705/10527/7175/1994/9349/1434/3843/3837/5901/10155/2316	36
GO:0006354	BP	GO:0006354	DNA-templated transcription, elongation	32/1773	119/18862	3.0988e-08	5.0752e-07	3.757e-07	11143/7469/79577/54623/5434/11047/25920/55677/5432/51497/27336/6830/5430/2962/23168/5437/4686/80349/284695/6829/10915/6923/5431/3150/7343/6921/10189/6749/57805/11198/7919/3192	32
GO:0061136	BP	GO:0061136	regulation of proteasomal protein catabolic process	42/1773	182/18862	3.20254e-08	5.22954e-07	3.87125e-07	23376/2931/6386/5721/57095/8473/4130/7917/2876/23640/5716/10197/207/10134/6599/29978/29979/9491/5720/10213/1191/8667/3093/6923/9097/2932/51035/6449/5704/5702/56893/7874/5700/57805/7514/5701/6135/10399/11315/7415/3303/3304	42
GO:0005996	BP	GO:0005996	monosaccharide metabolic process	55/1773	272/18862	3.71374e-08	6.04636e-07	4.47591e-07	57486/10269/4351/26007/5091/23509/10580/9446/1528/2931/8604/2584/5214/283209/8473/10165/6576/207/2539/9852/6652/1737/55276/51181/5500/8402/6513/5160/5162/2805/2932/11164/1727/230/7874/5499/2806/5236/5213/5211/1642/231/10327/6888/5226/4190/7086/4191/2171/5223/226/5230/7167/3146/5315	55
GO:0060249	BP	GO:0060249	anatomical structure homeostasis	81/1773	466/18862	3.7597e-08	6.10314e-07	4.51795e-07	1020/23413/6456/57482/79888/5394/55651/55226/581/1736/54386/546/4130/7037/5984/1073/4361/23154/5982/5424/5781/1525/5976/6513/6119/7082/2778/3688/11151/56252/7874/2271/5594/10728/5879/6118/6647/11171/5213/6117/118/328/231/7414/1639/794/22948/7520/5111/10574/10575/3315/6950/7203/3184/142/10576/3178/2547/3320/10694/5591/226/3192/5052/3181/8294/8359/8360/8361/8362/8363/8364/8365/8366/8367/8368/8370/1…	81
GO:0031109	BP	GO:0031109	microtubule polymerization or depolymerization	31/1773	114/18862	3.81959e-08	6.18211e-07	4.57641e-07	58497/10142/10013/22924/7283/4130/55201/5058/10982/4204/50810/23122/4733/23332/9181/7756/6904/10382/9793/5879/4137/2288/11075/22919/1639/6188/4926/3303/3304/4133/4131	31
GO:0009205	BP	GO:0009205	purine ribonucleoside triphosphate metabolic process	25/1773	80/18862	3.94735e-08	6.37016e-07	4.71561e-07	79631/8604/10165/4976/9567/2773/30968/10632/4513/523/509/10476/522/539/515/3615/4830/142/498/7415/226/5901/506/7114/5315	25
GO:0046822	BP	GO:0046822	regulation of nucleocytoplasmic transport	29/1773	103/18862	4.51421e-08	7.26366e-07	5.37704e-07	1020/54888/8882/57506/55677/23636/6830/8021/4659/10204/5781/5936/10541/2010/5905/11052/51569/2932/5594/23435/7175/7295/3843/11315/1660/5901/10155/2316/7531	29
GO:0016050	BP	GO:0016050	vesicle organization	64/1773	339/18862	4.60091e-08	7.38157e-07	5.46433e-07	23325/149371/9482/5537/26052/10016/9892/10972/8027/4218/6386/8907/399687/8943/950/7251/112755/8301/5869/55291/2773/9798/51479/10959/6616/6857/54874/8417/164/9146/51510/8396/9217/9632/51160/1785/23673/81876/23256/8452/22872/8724/1173/6396/10484/4905/6812/11151/51534/8615/10342/9554/51552/10015/301/8775/3799/23603/9218/7879/375/5048/302/811	64
GO:1901605	BP	GO:1901605	alpha-amino acid metabolic process	43/1773	191/18862	4.7412e-08	7.58453e-07	5.61457e-07	60496/7915/58478/8604/2752/5832/4204/56474/4357/1719/22929/4507/63826/642/1743/56267/56954/4967/5471/1738/8833/2805/1503/80150/5198/5860/875/102724560/6472/38/23576/2618/2806/3028/6301/29968/2746/501/191/4522/26227/11315/23564	43
GO:1901880	BP	GO:1901880	negative regulation of protein depolymerization	23/1773	70/18862	4.80767e-08	7.66858e-07	5.67679e-07	57482/10013/2314/11344/50810/5756/23122/822/23332/29767/9181/120/119/136319/5962/830/6712/118/829/11075/832/6711/4131	23
GO:0006120	BP	GO:0006120	mitochondrial electron transport, NADH to ubiquinone	20/1773	55/18862	5.22338e-08	8.28365e-07	6.1321e-07	126328/4709/4728/51079/4704/4723/4698/4706/4712/4702/4705/4724/55967/4729/4720/4697/4722/1738/4719/11315	20
GO:0016233	BP	GO:0016233	telomere capping	20/1773	55/18862	5.22338e-08	8.28365e-07	6.1321e-07	54386/4361/7874/5594/3184/5591/8294/8359/8360/8361/8362/8363/8364/8365/8366/8367/8368/8370/121504/554313	20
GO:0048857	BP	GO:0048857	neural nucleus development	21/1773	60/18862	5.27291e-08	8.33818e-07	6.17247e-07	7707/2539/57447/4722/1267/1340/4781/522/8655/515/387/2746/7533/3309/10971/801/805/808/10409/7531/1152	21
GO:0051656	BP	GO:0051656	establishment of organelle localization	76/1773	431/18862	5.36167e-08	8.45423e-07	6.25838e-07	1020/867/5537/10652/25777/26052/55860/60412/10016/9892/10972/283489/23636/9183/81929/55201/8943/4976/8301/4927/55291/27436/23122/10959/54874/23332/26958/22820/51510/6993/6059/3692/9632/6209/1785/81876/4646/23256/8452/22872/6396/10484/3996/4905/6812/3688/8615/10342/9554/10128/8775/10097/55968/3799/10726/7514/4137/10096/375/10540/5048/1639/23224/4134/3837/81/4926/7430/4869/5901/4133/1778/3192/1072/…	76
GO:0006303	BP	GO:0006303	double-strand break repair via nonhomologous end joining	28/1773	98/18862	5.42873e-08	8.53551e-07	6.31855e-07	84309/23347/4361/3980/10213/7158/7334/27339/7520/8091/3148/2547/5591/3146/8294/8359/8360/8361/8362/8363/8364/8365/8366/8367/8368/8370/121504/554313	28
GO:2001233	BP	GO:2001233	regulation of apoptotic signaling pathway	65/1773	348/18862	5.50827e-08	8.6359e-07	6.39287e-07	51060/51079/5770/51024/3685/3065/581/2876/4976/5716/10197/1459/207/10134/2773/8682/6648/29979/23028/5859/9181/1191/4722/8575/3301/1457/183/4282/55031/10059/10449/2932/10131/2244/10961/9774/2017/7178/2266/10525/5499/6647/6201/57805/6422/6135/292/7417/5062/5034/2950/1495/3315/10399/142/3148/6188/2923/6421/11315/7001/4841/3303/3304/3190	65
GO:0097237	BP	GO:0097237	cellular response to toxic substance	32/1773	122/18862	5.88554e-08	9.20117e-07	6.81132e-07	9446/64359/2876/2936/2879/1719/51780/847/2944/6648/84817/7296/2947/84293/23530/2098/2946/6647/10935/10549/25824/10327/9588/128/7295/2950/11315/7001/3050/3046/5052/3047	32
GO:0022604	BP	GO:0022604	regulation of cell morphogenesis	59/1773	305/18862	6.31752e-08	9.84853e-07	7.29053e-07	388/10269/5921/114793/57175/3611/1729/5362/23191/4976/2909/10428/9043/53335/23011/6857/9373/23580/1398/1785/23654/5764/2035/708/10059/28988/4192/11151/2244/2192/23327/5962/10109/1399/301/2266/10097/5879/23136/23603/387/55920/9948/4076/4478/832/23499/989/5034/81/2335/335/811/7430/1627/5591/226/2316/1072	59
GO:0032886	BP	GO:0032886	regulation of microtubule-based process	48/1773	227/18862	6.47456e-08	1.00648e-06	7.45065e-07	58497/10142/79187/4682/1729/10013/22924/55226/23636/4130/55201/5058/10982/4204/50810/23122/4733/26973/23332/8480/9181/51510/6904/79969/2932/1104/10015/10382/9793/5879/7175/4137/10432/2288/11075/23499/22919/1639/6188/4926/1213/4869/3303/3304/4133/1778/3192/4131	48
GO:0034401	BP	GO:0034401	chromatin organization involved in regulation of transcription	37/1773	154/18862	6.88855e-08	1.06782e-06	7.90472e-07	1788/3065/53615/23347/4204/25942/1786/3024/8289/8520/1487/8467/7175/201161/3005/55506/3066/9555/8091/8971/10155/3009/3146/8294/8359/8360/8361/8362/8363/8364/8365/8366/8367/8368/8370/121504/554313	37
GO:1903312	BP	GO:1903312	negative regulation of mRNA metabolic process	26/1773	88/18862	7.634e-08	1.18005e-06	8.73554e-07	10605/10921/23367/1153/6829/8241/10284/708/6431/8148/8683/9967/6432/23435/1996/11338/1994/10949/5725/10492/2521/3184/1660/3192/3190/3181	26
GO:0009142	BP	GO:0009142	nucleoside triphosphate biosynthetic process	25/1773	84/18862	1.15475e-07	1.78e-06	1.31767e-06	1841/51727/8604/10165/56474/30968/10632/1503/203/4513/523/509/10476/522/539/515/3615/4830/142/498/7415/226/506/7114/5315	25
GO:0009112	BP	GO:0009112	nucleobase metabolic process	15/1773	34/18862	1.22856e-07	1.88595e-06	1.39611e-06	51727/7372/3251/56474/4329/23028/5471/8833/1503/6472/5594/2618/6240/10606/7276	15
GO:0006790	BP	GO:0006790	sulfur compound metabolic process	68/1773	378/18862	1.23034e-07	1.88595e-06	1.39611e-06	79966/5091/84532/9061/4597/23597/64780/9446/4682/2941/58478/54332/5096/3029/552900/654483/10380/2876/8801/6576/5095/2936/4357/2539/2944/4507/10550/51144/9524/642/1743/79017/2937/1737/2947/10654/4967/3295/1738/5160/8803/5162/2739/10539/27430/875/102724560/7358/2098/38/2946/6647/47/1462/11332/1622/55748/10327/1192/191/1937/3313/2950/3417/4522/26227/11315/2194	68
GO:0043470	BP	GO:0043470	regulation of carbohydrate catabolic process	26/1773	90/18862	1.25959e-07	1.92543e-06	1.42533e-06	23279/5571/2931/8604/23165/348995/23636/55746/81929/8473/950/79902/28964/4927/8021/9631/8480/23225/3692/5500/6396/9688/5499/7175/5223/3146	26
GO:0051016	BP	GO:0051016	barbed-end actin filament capping	13/1773	26/18862	1.37943e-07	2.10277e-06	1.55661e-06	57482/2314/11344/5756/822/120/119/136319/5962/830/118/829/832	13
GO:0048675	BP	GO:0048675	axon extension	30/1773	114/18862	1.39721e-07	2.12399e-06	1.57231e-06	1020/57611/5532/5058/23191/57698/4897/4035/11344/25942/23011/1982/3897/1785/9201/28988/2932/2017/22902/4137/23499/7414/57142/2335/3320/1627/2664/4133/1808/4131	30
GO:0010720	BP	GO:0010720	positive regulation of cell development	56/1773	290/18862	1.44311e-07	2.18773e-06	1.6195e-06	57611/3611/23376/22938/3065/5362/5058/5604/23191/4976/57698/4035/6009/11344/9798/23011/1982/3897/23028/10419/1398/1785/23654/5764/708/10059/28988/4192/2244/10109/1399/22902/2266/10097/5879/387/4137/51593/118/3066/4076/5803/23499/27339/7520/396/5034/4673/2335/335/811/1627/2664/5591/2316/4131	56
GO:0032781	BP	GO:0032781	positive regulation of ATPase activity	20/1773	58/18862	1.44949e-07	2.19136e-06	1.62219e-06	51726/29128/481/10598/10294/483/3301/1785/3337/140735/23234/6742/26097/5217/8775/4436/8655/2956/1660/3192	20
GO:0031333	BP	GO:0031333	negative regulation of protein-containing complex assembly	34/1773	139/18862	1.45843e-07	2.19883e-06	1.62772e-06	57482/10013/2314/11344/5756/822/29767/1191/120/119/6904/2932/6812/136319/5962/23521/51571/10382/5217/830/6712/118/829/2288/7417/11075/832/22919/11315/6711/3309/4133/7114/3146	34
GO:0042769	BP	GO:0042769	DNA damage response, detection of DNA damage	16/1773	39/18862	1.60554e-07	2.40743e-06	1.78214e-06	8450/57599/8451/5984/5982/5424/3301/6119/6118/6117/1642/8091/5111/142/6188/6233	16
GO:0045773	BP	GO:0045773	positive regulation of axon extension	16/1773	39/18862	1.60554e-07	2.40743e-06	1.78214e-06	57611/5058/23191/57698/4035/11344/1982/3897/28988/22902/4137/23499/2335/1627/2664/4131	16
GO:0030100	BP	GO:0030100	regulation of endocytosis	44/1773	206/18862	1.67121e-07	2.4991e-06	1.85e-06	408/867/55681/60682/22848/6456/26060/55738/1175/5770/5532/5868/3685/9892/6386/55198/29934/7251/112755/8301/5869/4035/10211/382/23011/51479/3092/29978/1191/51160/1785/10059/6455/3673/23327/160/5878/5879/163/375/302/801/808/3190	44
GO:0006749	BP	GO:0006749	glutathione metabolic process	21/1773	64/18862	1.87735e-07	2.79975e-06	2.07256e-06	9446/2941/54332/3029/2876/2936/2539/2944/10550/79017/2937/2947/2739/2946/6647/55748/1192/1937/2950/3417/11315	21
GO:0048013	BP	GO:0048013	ephrin receptor signaling pathway	25/1773	86/18862	1.91604e-07	2.84972e-06	2.10955e-06	7410/5921/1948/23385/1175/6386/5058/28964/10093/10094/5781/10092/1398/1173/10552/160/161/10109/1947/10097/5879/387/10096/163/71	25
GO:0016241	BP	GO:0016241	regulation of macroautophagy	37/1773	160/18862	1.95981e-07	2.90697e-06	2.15193e-06	1020/23265/51382/149371/28956/51100/5571/22930/9114/60412/528/112936/10013/823/51606/25782/26086/9559/6009/207/529/2773/23367/826/29978/29979/8396/6829/5049/23256/56893/523/526/9554/55737/7416/7345	37
GO:0042274	BP	GO:0042274	ribosomal small subunit biogenesis	23/1773	75/18862	2.01054e-07	2.97419e-06	2.20169e-06	6169/55226/11157/6229/6209/6234/4809/6232/6230/6204/6194/6217/6201/6227/6218/6193/6202/6223/6208/7520/3921/5591/4869	23
GO:2000059	BP	GO:2000059	negative regulation of ubiquitin-dependent protein catabolic process	18/1773	49/18862	2.02317e-07	2.98486e-06	2.20959e-06	6386/8473/4130/7917/1459/6599/8667/1457/9097/51035/6449/7874/6201/57805/6135/9349/6125/11315	18
GO:0001558	BP	GO:0001558	regulation of cell growth	71/1773	406/18862	2.03914e-07	2.99615e-06	2.21795e-06	1020/28956/57611/51079/79577/4682/84687/2931/6386/5058/57446/23191/7251/57698/5716/5931/4089/4897/4035/207/2786/4686/9043/2539/11344/53335/1630/25942/9798/23011/1982/5300/6857/3897/9373/4722/84717/1457/1785/183/55031/28988/2932/6597/23327/136319/2017/2273/1981/1399/22902/5515/23136/57805/6422/5245/4137/23499/7919/10399/5518/57142/2335/1627/2664/3303/3304/4133/3009/1808/4131	71
GO:0030516	BP	GO:0030516	regulation of axon extension	26/1773	92/18862	2.04172e-07	2.99615e-06	2.21795e-06	1020/57611/5058/23191/57698/4897/4035/11344/25942/23011/1982/3897/1785/28988/2932/2017/22902/4137/23499/57142/2335/1627/2664/4133/1808/4131	26
GO:0030834	BP	GO:0030834	regulation of actin filament depolymerization	19/1773	54/18862	2.05731e-07	3.01101e-06	2.22895e-06	57482/2314/1073/11344/5756/822/29767/120/119/136319/5962/830/6712/11034/118/9948/829/832/6711	19
GO:0061387	BP	GO:0061387	regulation of extent of cell growth	28/1773	104/18862	2.15649e-07	3.14778e-06	2.3302e-06	1020/57611/5058/23191/57698/4897/4035/11344/1630/25942/9798/23011/1982/3897/1785/28988/2932/2017/22902/4137/23499/57142/2335/1627/2664/4133/1808/4131	28
GO:0043242	BP	GO:0043242	negative regulation of protein-containing complex disassembly	24/1773	81/18862	2.25901e-07	3.28871e-06	2.43452e-06	57482/10013/2314/11344/50810/5756/23122/822/23332/29767/9181/120/119/136319/56893/5962/830/6712/118/829/11075/832/6711/4131	24
GO:0000338	BP	GO:0000338	protein deneddylation	8/1773	10/18862	2.27267e-07	3.29119e-06	2.43636e-06	9318/64708/2873/10987/10920/10980/51138/8533	8
GO:1904851	BP	GO:1904851	positive regulation of establishment of protein localization to telomere	8/1773	10/18862	2.27267e-07	3.29119e-06	2.43636e-06	1736/22948/10574/10575/6950/7203/10576/10694	8
GO:0034063	BP	GO:0034063	stress granule assembly	12/1773	23/18862	2.31287e-07	3.33839e-06	2.4713e-06	23215/1153/1965/11273/9908/10146/7812/9898/6228/1656/4137/1778	12
GO:2000058	BP	GO:2000058	regulation of ubiquitin-dependent protein catabolic process	37/1773	161/18862	2.3174e-07	3.33839e-06	2.4713e-06	23376/2931/7337/6386/8473/4130/7917/23640/5716/1459/207/10134/6599/29978/29979/1191/8667/1457/3093/6923/9097/2932/51035/6449/56893/7874/6201/57805/7514/6135/9349/6125/10399/11315/7415/3303/3304	37
GO:0016049	BP	GO:0016049	cell growth	79/1773	470/18862	2.34216e-07	3.36525e-06	2.49118e-06	1020/28956/6456/57669/57611/51079/79577/5532/4682/84687/2931/10013/6386/5058/57446/23191/7251/57698/5716/5931/4089/4897/4035/207/2786/4686/9043/2539/11344/53335/1630/25942/9798/23011/1982/5300/6857/3897/9373/4722/84717/1457/1785/183/55031/9201/28988/2932/6597/23327/136319/2017/2273/1981/1399/22902/5515/23136/57805/6422/5245/8826/4137/23499/7414/7919/10399/5518/57142/2335/3320/1627/2664/3303/3304/…	79
GO:0062197	BP	GO:0062197	cellular response to chemical stress	63/1773	347/18862	2.53548e-07	3.63352e-06	2.68977e-06	154807/388/54205/10013/116988/57465/29957/56616/2876/54936/2936/207/1719/2539/847/25942/10550/6780/6648/7296/29979/9181/1965/1398/8575/3301/9361/1785/9943/3954/6513/10314/5536/10131/5594/301/6647/10935/4137/328/25824/3066/231/9588/488/7295/7520/5034/2950/5111/3315/10399/3184/142/6188/6421/11315/7001/2547/4841/3303/3304/5052	63
GO:0060070	BP	GO:0060070	canonical Wnt signaling pathway	61/1773	333/18862	2.84448e-07	4.06575e-06	3.00974e-06	55681/5868/3611/2931/5711/3065/5721/5683/5714/5713/3485/5716/5495/10197/219287/5300/79718/5690/9491/3836/5720/10213/2010/5710/8452/5695/5204/5684/55031/2932/4192/5704/5702/9861/5694/5706/5718/5691/5700/5692/5709/5705/5685/5719/5689/5686/5499/1500/8607/5707/5682/5717/5688/57805/6422/5693/5687/5708/5701/10856/7415	61
GO:0010769	BP	GO:0010769	regulation of cell morphogenesis involved in differentiation	26/1773	94/18862	3.2542e-07	4.63934e-06	3.43434e-06	3611/4976/23011/1398/1785/708/10059/28988/4192/2244/2192/10109/1399/2266/10097/5879/23603/55920/4076/5034/81/335/811/1627/5591/2316	26
GO:0000726	BP	GO:0000726	non-recombinational repair	28/1773	106/18862	3.31833e-07	4.71854e-06	3.49298e-06	84309/23347/4361/3980/10213/7158/7334/27339/7520/8091/3148/2547/5591/3146/8294/8359/8360/8361/8362/8363/8364/8365/8366/8367/8368/8370/121504/554313	28
GO:0009895	BP	GO:0009895	negative regulation of catabolic process	58/1773	312/18862	3.33742e-07	4.73346e-06	3.50402e-06	54888/81892/1676/2931/8604/6386/1736/29934/1595/8473/4130/10605/28964/7917/1459/207/1982/6599/23367/5300/1153/9491/8667/1457/8241/23256/9097/8724/51035/8148/6449/56893/7874/9554/6625/9967/23435/1996/1981/10128/6201/57805/5245/1994/6135/336/9349/23450/6125/10949/302/10492/2521/3184/11315/1660/3192/2316	58
GO:0051099	BP	GO:0051099	positive regulation of binding	38/1773	170/18862	3.40603e-07	4.81835e-06	3.56686e-06	1020/57669/22924/26086/4035/4686/10211/5300/23028/1965/119/2035/3673/2932/8664/8721/3646/2280/8663/1981/5515/1488/3005/118/6135/4830/22919/7295/302/142/3148/11315/1660/5901/10155/801/808/3146	38
GO:0051693	BP	GO:0051693	actin filament capping	16/1773	41/18862	3.65747e-07	5.16079e-06	3.82036e-06	57482/2314/11344/5756/822/29767/120/119/136319/5962/830/6712/118/829/832/6711	16
GO:0045814	BP	GO:0045814	negative regulation of gene expression, epigenetic	31/1773	125/18862	3.67889e-07	5.17773e-06	3.8329e-06	1788/23347/5931/4204/25942/1786/3024/8520/1487/3005/55506/3066/9555/5928/8971/3009/3146/8294/8359/8360/8361/8362/8363/8364/8365/8366/8367/8368/8370/121504/554313	31
GO:0048025	BP	GO:0048025	negative regulation of mRNA splicing, via spliceosome	11/1773	20/18862	3.69916e-07	5.19297e-06	3.84418e-06	10921/8241/10284/708/6431/8683/6432/11338/5725/3190/3181	11
GO:1990138	BP	GO:1990138	neuron projection extension	37/1773	164/18862	3.78993e-07	5.30687e-06	3.9285e-06	1020/6456/57611/5532/5058/23191/57698/4897/4035/9043/11344/53335/25942/23011/1982/6857/3897/9373/1785/9201/28988/2932/23327/2017/22902/8826/4137/23499/7414/57142/2335/3320/1627/2664/4133/1808/4131	37
GO:0007163	BP	GO:0007163	establishment or maintenance of cell polarity	44/1773	212/18862	3.91792e-07	5.46075e-06	4.04241e-06	388/2319/9183/399687/5058/81609/57698/2909/23122/382/23332/10486/10092/6993/1398/9124/10890/378/2932/3996/3688/51571/10015/1399/22902/9793/10097/5879/55968/387/10096/9948/25932/4478/5048/1639/4134/10487/1495/10399/4926/3320/6624/4131	44
GO:0045930	BP	GO:0045930	negative regulation of mitotic cell cycle	59/1773	321/18862	3.94539e-07	5.46075e-06	4.04241e-06	4849/79577/10498/5711/581/5721/9183/5683/5714/5713/5716/8454/10197/4361/5690/9491/8883/51143/5720/10213/5710/23019/5695/7756/5684/55031/5704/5702/9861/5694/5706/5718/5691/5700/5692/5709/2273/5705/5685/5719/5689/6500/5686/4436/6118/5707/5682/5717/5688/7175/5693/5687/5708/5701/9184/3276/8091/5111/5591	59
GO:0006695	BP	GO:0006695	cholesterol biosynthetic process	22/1773	72/18862	3.95311e-07	5.46075e-06	4.04241e-06	4597/1717/50814/1718/1595/2539/4047/3930/10654/11160/2222/10449/1727/3422/2224/39/6647/47/3837/2194/335/5901	22
GO:1902653	BP	GO:1902653	secondary alcohol biosynthetic process	22/1773	72/18862	3.95311e-07	5.46075e-06	4.04241e-06	4597/1717/50814/1718/1595/2539/4047/3930/10654/11160/2222/10449/1727/3422/2224/39/6647/47/3837/2194/335/5901	22
GO:0007007	BP	GO:0007007	inner mitochondrial membrane organization	19/1773	56/18862	3.95936e-07	5.46075e-06	4.04241e-06	51079/55750/10651/25813/4976/10939/3954/10632/54927/9868/509/10476/522/539/515/10989/3313/498/506	19
GO:0042743	BP	GO:0042743	hydrogen peroxide metabolic process	19/1773	56/18862	3.95936e-07	5.46075e-06	4.04241e-06	51/10013/2876/847/6648/4513/23530/5879/6647/10935/10549/25824/9588/11315/7001/3050/3046/5052/3047	19
GO:0016358	BP	GO:0016358	dendrite development	47/1773	234/18862	4.37826e-07	6.02339e-06	4.45891e-06	1020/6801/26052/57118/84687/10498/2931/10013/7337/23098/4130/55201/23191/4976/10160/4204/8301/3251/53335/1630/382/23011/1982/10152/6993/1398/55236/5764/378/1496/10059/9201/28988/2932/23327/1399/10097/8826/3066/4076/5062/375/7533/1627/4133/1072/4131	47
GO:0043648	BP	GO:0043648	dicarboxylic acid metabolic process	26/1773	96/18862	5.10436e-07	6.99284e-06	5.17657e-06	7915/8604/2752/6390/5832/8801/1719/1743/56267/4200/56954/4967/1738/2805/6389/2271/6472/471/2806/47/2746/3417/4522/3418/4190/4191	26
GO:0098869	BP	GO:0098869	cellular oxidant detoxification	27/1773	102/18862	5.11491e-07	6.99284e-06	5.17657e-06	9446/64359/2876/2936/2879/1719/51780/847/6648/84817/7296/84293/23530/2946/6647/10935/10549/25824/9588/7295/2950/11315/7001/3050/3046/5052/3047	27
GO:0043624	BP	GO:0043624	cellular protein complex disassembly	45/1773	221/18862	5.12105e-07	6.99284e-06	5.17657e-06	64780/57482/84687/10013/63908/4130/55201/2314/1073/11344/50810/5756/23122/2935/822/23332/29767/2107/9181/6059/327/5976/120/119/6455/4905/136319/5962/9793/830/8775/6712/11034/118/9948/829/11075/832/1984/6711/51504/1072/10763/4131/3312	45
GO:0009201	BP	GO:0009201	ribonucleoside triphosphate biosynthetic process	22/1773	73/18862	5.15976e-07	7.02825e-06	5.20278e-06	8604/10165/56474/30968/10632/1503/4513/523/509/10476/522/539/515/3615/4830/142/498/7415/226/506/7114/5315	22
GO:0008361	BP	GO:0008361	regulation of cell size	38/1773	173/18862	5.44084e-07	7.39282e-06	5.47265e-06	1020/7410/57611/5058/23191/57698/4897/4035/207/11344/1630/25942/9798/23011/1982/3897/23028/1785/28988/2932/136319/5962/2017/51520/22902/5879/387/4137/118/4478/23499/57142/2335/1627/2664/4133/1808/4131	38
GO:0032204	BP	GO:0032204	regulation of telomere maintenance	23/1773	79/18862	5.68321e-07	7.70098e-06	5.70077e-06	5394/55226/1736/54386/546/4361/5976/56252/7874/5594/22948/7520/10574/10575/6950/7203/3184/142/10576/3178/10694/3192/3181	23
GO:0044275	BP	GO:0044275	cellular carbohydrate catabolic process	17/1773	47/18862	5.69562e-07	7.70098e-06	5.70077e-06	178/26007/2931/55347/283209/950/6652/55276/5500/2820/5499/5236/5226/5223/7167/801/3146	17
GO:0050685	BP	GO:0050685	positive regulation of mRNA processing	14/1773	33/18862	5.85452e-07	7.89642e-06	5.84545e-06	79577/54623/22938/26528/4686/1153/11051/6625/9967/6434/9588/27339/4691/3312	14
GO:0046364	BP	GO:0046364	monosaccharide biosynthetic process	26/1773	97/18862	6.3561e-07	8.55199e-06	6.33075e-06	57486/5091/8604/8473/10165/6576/2539/6652/8402/2805/230/7874/2806/5236/1642/231/10327/6888/5226/4190/7086/4191/5223/226/5230/7167	26
GO:0071356	BP	GO:0071356	cellular response to tumor necrosis factor	55/1773	296/18862	6.77244e-07	9.08631e-06	6.72629e-06	3611/5711/5721/5683/5714/5713/5716/10197/207/84817/5690/9491/5720/9181/10213/3093/5710/5695/5684/5704/5702/9861/5694/5706/5718/5691/5700/5692/5709/5594/5705/5685/5719/5689/5686/5707/5682/5717/5688/6422/5693/5687/5708/5701/10594/9590/2950/10399/81/6188/335/1660/3303/3304/7114	55
GO:0016051	BP	GO:0016051	carbohydrate biosynthetic process	43/1773	209/18862	6.78625e-07	9.08631e-06	6.72629e-06	57486/178/5091/10580/2931/8604/9526/283209/8473/10165/6576/207/2539/9852/54187/6652/55276/5500/8402/6513/2805/2932/7360/230/7874/160/5499/2806/5236/1642/51477/231/10327/6888/5226/4190/7086/4191/5223/1213/226/5230/7167	43
GO:0050690	BP	GO:0050690	regulation of defense response to virus by virus	13/1773	29/18862	6.86969e-07	9.17571e-06	6.79247e-06	1175/8907/51606/5610/164/162/1173/160/161/5879/163/5062/375	13
GO:0051098	BP	GO:0051098	regulation of binding	63/1773	357/18862	7.0895e-07	9.44612e-06	6.99264e-06	1020/10269/57669/10498/22924/581/26086/4089/4035/8189/2962/207/4686/25942/10211/51773/5300/5792/64710/23028/1965/1398/1460/119/2035/3673/2932/8664/8721/6717/3646/2280/8663/1981/5515/1488/5499/3005/118/10856/6135/3066/4830/9775/22919/488/7295/8091/302/10399/142/3148/11315/1660/5901/10155/4133/7114/801/808/3146/1400/10763	63
GO:0000028	BP	GO:0000028	ribosomal small subunit assembly	11/1773	21/18862	7.10648e-07	9.44612e-06	6.99264e-06	6169/6209/6234/6232/6204/6193/6223/6208/7520/3921/5591	11
GO:1904814	BP	GO:1904814	regulation of protein localization to chromosome, telomeric region	9/1773	14/18862	7.25918e-07	9.62585e-06	7.12569e-06	1736/9555/22948/10574/10575/6950/7203/10576/10694	9
GO:0051222	BP	GO:0051222	positive regulation of protein transport	57/1773	312/18862	7.56883e-07	9.98806e-06	7.39382e-06	1020/975/9747/51100/7447/5532/51024/8882/57506/4836/10972/2931/25930/399687/5058/7251/4035/1459/10134/382/10204/7332/10541/51160/2010/10059/2932/29085/2244/6717/9141/5594/23435/5019/22902/2266/5879/10055/3799/8655/7175/10075/9520/2746/375/3843/7533/10399/7529/7430/5901/7532/10971/10155/2316/7531/7534	57
GO:0001731	BP	GO:0001731	formation of translation preinitiation complex	8/1773	11/18862	7.64124e-07	9.98806e-06	7.39382e-06	28985/1983/8562/8894/7458/23521/1975/1968	8
GO:0070203	BP	GO:0070203	regulation of establishment of protein localization to telomere	8/1773	11/18862	7.64124e-07	9.98806e-06	7.39382e-06	1736/22948/10574/10575/6950/7203/10576/10694	8
GO:1904869	BP	GO:1904869	regulation of protein localization to Cajal body	8/1773	11/18862	7.64124e-07	9.98806e-06	7.39382e-06	1736/22948/10574/10575/6950/7203/10576/10694	8
GO:1904871	BP	GO:1904871	positive regulation of protein localization to Cajal body	8/1773	11/18862	7.64124e-07	9.98806e-06	7.39382e-06	1736/22948/10574/10575/6950/7203/10576/10694	8
GO:1905214	BP	GO:1905214	regulation of RNA binding	8/1773	11/18862	7.64124e-07	9.98806e-06	7.39382e-06	10498/4686/64710/8664/3646/8663/1981/9775	8
GO:0090151	BP	GO:0090151	establishment of protein localization to mitochondrial membrane	18/1773	53/18862	7.84528e-07	1.02305e-05	7.57327e-06	51079/55750/4836/25813/581/56993/9868/9141/7533/7529/3308/3320/7532/10971/801/808/7531/7534	18
GO:0010506	BP	GO:0010506	regulation of autophagy	59/1773	328/18862	8.30334e-07	1.08022e-05	7.9965e-06	1020/23265/51382/149371/28956/51100/10269/5571/22930/9114/60412/528/23376/112936/2931/10013/4218/823/51606/493856/25782/26086/9559/6009/1459/207/529/2773/1982/23367/826/9100/29978/1917/29979/8396/6829/5049/23256/92140/5660/10059/2932/56893/523/526/2017/9554/6625/1981/11331/55737/4137/7416/3315/11315/7345/3146/1915	59
GO:0060284	BP	GO:0060284	regulation of cell development	79/1773	485/18862	8.57118e-07	1.11243e-05	8.23497e-06	1020/58497/57611/3611/23376/2931/22938/55198/23236/3065/5362/5058/5604/23191/4976/57698/4089/4035/6009/11344/53335/1630/51441/9798/23011/1982/3897/23028/10419/6993/1398/1785/23654/5764/708/10059/28988/2932/4192/2244/2192/10109/1399/22902/2266/10097/5879/23603/387/55920/4137/51593/118/3066/4076/5803/23499/7414/6223/27339/7520/396/5034/4673/1495/7533/3418/81/57142/3148/2335/335/811/1627/2664/5591/4…	79
GO:1900180	BP	GO:1900180	regulation of protein localization to nucleus	31/1773	130/18862	9.24223e-07	1.19671e-05	8.85881e-06	11143/8882/57506/2752/1736/23636/7037/207/25942/5300/10204/51569/9201/2932/5594/23435/7175/22948/3843/1495/10574/10575/6950/7203/142/10576/11315/10694/5901/10155/2316	31
GO:0034599	BP	GO:0034599	cellular response to oxidative stress	55/1773	299/18862	9.42208e-07	1.21713e-05	9.00999e-06	154807/388/54205/10013/116988/57465/29957/56616/2876/54936/2936/207/1719/2539/847/25942/10550/6780/6648/7296/29979/1965/1398/8575/9361/1785/10314/5536/10131/5594/301/6647/10935/4137/328/25824/3066/9588/488/7295/5034/2950/5111/3315/10399/3184/142/6188/6421/11315/7001/4841/3303/3304/5052	55
GO:0006890	BP	GO:0006890	retrograde vesicle-mediated transport, Golgi to endoplasmic reticulum	24/1773	87/18862	9.63804e-07	1.24211e-05	9.19493e-06	11316/55738/6836/57410/57222/10972/9183/64837/10959/22818/23760/26958/22820/81876/23256/378/372/381/4905/9554/9276/1315/8775/1314	24
GO:0000183	BP	GO:0000183	rDNA heterochromatin assembly	15/1773	39/18862	1.05706e-06	1.35595e-05	1.00376e-05	8467/8294/8359/8360/8361/8362/8363/8364/8365/8366/8367/8368/8370/121504/554313	15
GO:0034314	BP	GO:0034314	Arp2/3 complex-mediated actin nucleation	15/1773	39/18862	1.05706e-06	1.35595e-05	1.00376e-05	57175/23191/10093/10094/10788/10092/10152/2764/1496/10552/10109/10787/10097/10096/375	15
GO:0008637	BP	GO:0008637	apoptotic mitochondrial changes	29/1773	118/18862	1.05984e-06	1.35634e-05	1.00406e-05	51024/4836/2931/581/2876/4976/5716/92609/207/6648/79017/1191/10059/10449/2932/9141/4719/55737/57805/292/7417/7533/7529/3329/7532/10971/3303/7531/7534	29
GO:0072331	BP	GO:0072331	signal transduction by p53 class mediator	50/1773	263/18862	1.0712e-06	1.36771e-05	1.01247e-05	1020/1107/4849/10269/112858/5571/10498/4839/22938/3065/581/53615/8805/546/7917/5716/5931/5984/1459/4361/207/5982/5300/9100/23028/10419/1457/4646/1460/6119/23019/4282/3094/8148/9219/4436/6118/6749/6201/6117/6135/3066/1655/9349/11198/3276/5928/6125/5111/3190	50
GO:0046112	BP	GO:0046112	nucleobase biosynthetic process	10/1773	18/18862	1.13347e-06	1.44053e-05	1.06638e-05	51727/7372/3251/56474/5471/8833/1503/6472/2618/10606	10
GO:2000641	BP	GO:2000641	regulation of early endosome to late endosome transport	10/1773	18/18862	1.13347e-06	1.44053e-05	1.06638e-05	5605/25930/29934/5604/23011/8724/5962/5594/4478/7430	10
GO:0006626	BP	GO:0006626	protein targeting to mitochondrion	26/1773	100/18862	1.20065e-06	1.52077e-05	1.12578e-05	51100/51079/55750/51024/25813/2931/54332/9512/10452/9049/10469/56993/92609/1459/10134/9131/7332/9868/293/9141/10055/10075/9520/3308/3320/3329	26
GO:0098754	BP	GO:0098754	detoxification	32/1773	138/18862	1.20214e-06	1.52077e-05	1.12578e-05	9446/64359/2876/2936/2879/1719/51780/847/2944/6648/84817/7296/2947/84293/23530/2098/2946/6647/10935/10549/25824/10327/9588/128/7295/2950/11315/7001/3050/3046/5052/3047	32
GO:0050434	BP	GO:0050434	positive regulation of viral transcription	12/1773	26/18862	1.26281e-06	1.59387e-05	1.17988e-05	7469/5434/25920/5432/51497/5430/2962/5437/51773/6829/5431/1660	12
GO:0032434	BP	GO:0032434	regulation of proteasomal ubiquitin-dependent protein catabolic process	31/1773	132/18862	1.31355e-06	1.65412e-05	1.22449e-05	23376/2931/6386/8473/4130/7917/23640/5716/207/10134/6599/29978/29979/1191/8667/3093/6923/9097/2932/51035/6449/56893/7874/57805/7514/6135/10399/11315/7415/3303/3304	31
GO:0006260	BP	GO:0006260	DNA replication	52/1773	280/18862	1.37414e-06	1.72646e-05	1.27804e-05	11143/25939/10269/3978/57418/8882/9188/546/5931/5984/4361/5965/25942/6241/5982/5424/3980/23244/64710/7150/9416/55704/30968/5976/92675/6119/4781/6742/5515/5879/6118/27101/10189/6749/6240/1854/6117/9126/11198/5763/4174/6418/4176/5928/4175/5111/4673/4172/4171/5518/4678/1660	52
GO:0060236	BP	GO:0060236	regulation of mitotic spindle organization	14/1773	35/18862	1.38456e-06	1.73559e-05	1.2848e-05	79187/23636/4733/8480/51510/1104/7175/1639/4926/1213/3303/3304/1778/3192	14
GO:0032508	BP	GO:0032508	DNA duplex unwinding	27/1773	107/18862	1.42236e-06	1.77892e-05	1.31687e-05	1107/8450/546/8451/5984/4361/5965/5982/7153/10146/6742/301/8607/6117/1642/10856/1653/4174/4176/7520/4175/4172/4171/142/2547/1660/6233	27
GO:0048588	BP	GO:0048588	developmental cell growth	44/1773	222/18862	1.47178e-06	1.83656e-05	1.35954e-05	1020/6456/57611/5532/2931/10013/5058/23191/57698/4897/4035/9043/2539/11344/53335/1630/25942/9798/23011/1982/5300/6857/3897/9373/1785/9201/28988/2932/23327/2017/22902/8826/4137/23499/7414/7919/57142/2335/3320/1627/2664/4133/1808/4131	44
GO:1905475	BP	GO:1905475	regulation of protein localization to membrane	40/1773	194/18862	1.54999e-06	1.92872e-05	1.42777e-05	1020/975/9747/9482/26060/56850/10580/51024/84687/10082/4836/5058/23184/8301/4035/207/382/8417/5764/1173/221914/3688/10434/9141/1399/3799/2817/163/2239/7533/10399/7529/6711/7430/2664/1213/7532/10971/7531/7534	40
GO:0006376	BP	GO:0006376	mRNA splice site selection	17/1773	50/18862	1.55616e-06	1.92872e-05	1.42777e-05	55692/6430/6631/10659/51747/8175/10658/6431/51631/8683/7536/10946/22827/10291/11168/58155/6426	17
GO:1990089	BP	GO:1990089	response to nerve growth factor	17/1773	50/18862	1.55616e-06	1.92872e-05	1.42777e-05	867/6456/7337/207/382/10094/1398/5764/1783/11151/988/4137/9775/6132/11075/3309/1938	17
GO:1903320	BP	GO:1903320	regulation of protein modification by small protein conjugation or removal	46/1773	237/18862	1.5764e-06	1.94942e-05	1.44309e-05	1020/408/57599/54165/10016/9320/23376/64359/2931/7337/8473/23640/5716/207/5300/29979/9373/23028/7332/3301/51160/9112/8452/9733/51035/7329/2280/6500/10055/11338/6201/10054/10075/55611/6135/7334/9349/6125/6187/6188/11315/7415/3320/3309/3303/3304	46
GO:0030835	BP	GO:0030835	negative regulation of actin filament depolymerization	16/1773	45/18862	1.5944e-06	1.96726e-05	1.4563e-05	57482/2314/11344/5756/822/29767/120/119/136319/5962/830/6712/118/829/832/6711	16
GO:0043467	BP	GO:0043467	regulation of generation of precursor metabolites and energy	35/1773	160/18862	1.66333e-06	2.04772e-05	1.51586e-05	23279/5571/10580/2931/8604/23165/348995/23636/55746/81929/8473/79902/28964/4927/207/55847/9852/8021/9631/8480/23225/3692/5500/6396/9688/2932/10131/6472/11331/5499/7175/11315/5223/7415/3146	35
GO:0010770	BP	GO:0010770	positive regulation of cell morphogenesis involved in differentiation	22/1773	78/18862	1.7986e-06	2.19949e-05	1.62821e-05	3611/4976/23011/1398/1785/708/10059/28988/4192/2244/10109/1399/2266/10097/5879/4076/5034/335/811/1627/5591/2316	22
GO:0016126	BP	GO:0016126	sterol biosynthetic process	22/1773	78/18862	1.7986e-06	2.19949e-05	1.62821e-05	4597/1717/50814/1718/1595/2539/4047/3930/10654/11160/2222/10449/1727/3422/2224/39/6647/47/3837/2194/335/5901	22
GO:0050772	BP	GO:0050772	positive regulation of axonogenesis	22/1773	78/18862	1.7986e-06	2.19949e-05	1.62821e-05	57611/5362/5058/5604/23191/57698/4035/11344/9798/1982/3897/23654/28988/22902/387/4137/23499/396/2335/1627/2664/4131	22
GO:0006368	BP	GO:0006368	transcription elongation from RNA polymerase II promoter	24/1773	90/18862	1.87525e-06	2.28814e-05	1.69383e-05	7469/79577/54623/5434/11047/25920/55677/5432/51497/6830/5430/2962/23168/5437/4686/80349/6829/10915/6923/5431/6921/6749/11198/3192	24
GO:2001234	BP	GO:2001234	negative regulation of apoptotic signaling pathway	44/1773	224/18862	1.89191e-06	2.30336e-05	1.7051e-05	51060/51079/5770/3685/3065/581/2876/4976/5716/10197/1459/207/2773/8682/6648/23028/5859/9181/1191/4722/3301/1457/4282/55031/10449/2932/10131/2244/2017/7178/2266/10525/57805/292/7417/2950/1495/3315/3148/11315/7001/4841/3303/3304	44
GO:0006754	BP	GO:0006754	ATP biosynthetic process	18/1773	56/18862	1.95943e-06	2.3803e-05	1.76205e-05	8604/10165/30968/10632/4513/523/509/10476/522/539/515/142/498/7415/226/506/7114/5315	18
GO:0006006	BP	GO:0006006	glucose metabolic process	42/1773	210/18862	1.97963e-06	2.39954e-05	1.7763e-05	57486/10269/5091/10580/2931/8604/5214/283209/8473/10165/6576/207/2539/9852/6652/1737/55276/51181/5500/8402/5160/5162/2805/2932/230/7874/5499/2806/5236/5213/5211/1642/10327/4190/4191/2171/5223/226/5230/7167/3146/5315	42
GO:0009206	BP	GO:0009206	purine ribonucleoside triphosphate biosynthetic process	20/1773	67/18862	1.98894e-06	2.40552e-05	1.78073e-05	8604/10165/30968/10632/4513/523/509/10476/522/539/515/3615/4830/142/498/7415/226/506/7114/5315	20
GO:0000209	BP	GO:0000209	protein polyubiquitination	59/1773	337/18862	2.06105e-06	2.48727e-05	1.84124e-05	867/9320/10013/7337/5711/5721/5683/5714/5713/63893/5716/8454/10197/5690/642/9491/9373/5720/10213/23321/7332/7064/3093/5710/8452/5695/5684/7174/23327/5704/5702/9861/5694/5706/5718/5691/5700/5692/5709/5705/5685/5719/5689/6500/5686/5707/5682/5717/5688/5693/5687/5708/5701/10075/55611/9520/7334/27339/6233	59
GO:0015949	BP	GO:0015949	nucleobase-containing small molecule interconversion	12/1773	27/18862	2.07857e-06	2.49203e-05	1.84476e-05	1841/51727/2936/56474/204/6241/7296/1503/203/6240/1854/4830	12
GO:0070199	BP	GO:0070199	establishment of protein localization to chromosome	12/1773	27/18862	2.07857e-06	2.49203e-05	1.84476e-05	1736/55506/10856/9555/22948/10574/10575/6950/7203/10576/10694/3009	12
GO:1903649	BP	GO:1903649	regulation of cytoplasmic transport	12/1773	27/18862	2.07857e-06	2.49203e-05	1.84476e-05	5605/25930/29934/5604/23011/8724/7874/5962/5594/4478/7430/4133	12
GO:1990542	BP	GO:1990542	mitochondrial transmembrane transport	27/1773	109/18862	2.09424e-06	2.49325e-05	1.84567e-05	8604/10452/79751/10165/81855/10469/4976/92609/6576/10939/9131/30968/3954/10632/9868/293/509/10476/522/94081/539/515/292/7416/498/3329/506	27
GO:0070202	BP	GO:0070202	regulation of establishment of protein localization to chromosome	8/1773	12/18862	2.10225e-06	2.49325e-05	1.84567e-05	1736/22948/10574/10575/6950/7203/10576/10694	8
GO:1903405	BP	GO:1903405	protein localization to nuclear body	8/1773	12/18862	2.10225e-06	2.49325e-05	1.84567e-05	1736/22948/10574/10575/6950/7203/10576/10694	8
GO:1904816	BP	GO:1904816	positive regulation of protein localization to chromosome, telomeric region	8/1773	12/18862	2.10225e-06	2.49325e-05	1.84567e-05	1736/22948/10574/10575/6950/7203/10576/10694	8
GO:1904867	BP	GO:1904867	protein localization to Cajal body	8/1773	12/18862	2.10225e-06	2.49325e-05	1.84567e-05	1736/22948/10574/10575/6950/7203/10576/10694	8
GO:0006310	BP	GO:0006310	DNA recombination	54/1773	299/18862	2.10898e-06	2.49585e-05	1.84759e-05	25939/57599/5531/54386/6830/23347/7037/4361/5965/3980/151987/64710/23028/3836/10213/7153/64919/3024/6119/7247/3838/56893/86/4436/10097/6118/8607/10189/2956/3005/6117/328/10856/7158/3149/7334/4174/4176/7520/7155/4175/4172/2521/4171/8971/142/3148/6421/2547/5591/3329/4841/3009/3146	54
GO:0042026	BP	GO:0042026	protein refolding	11/1773	23/18862	2.28023e-06	2.68122e-05	1.98482e-05	10294/6625/2280/3313/6767/3320/3309/3329/3303/3304/3312	11
GO:0048026	BP	GO:0048026	positive regulation of mRNA splicing, via spliceosome	11/1773	23/18862	2.28023e-06	2.68122e-05	1.98482e-05	22938/26528/4686/1153/6625/9967/6434/9588/27339/4691/3312	11
GO:1903421	BP	GO:1903421	regulation of synaptic vesicle recycling	11/1773	23/18862	2.28023e-06	2.68122e-05	1.98482e-05	1020/56850/26052/5532/23191/112755/9373/10059/6455/801/808	11
GO:0034502	BP	GO:0034502	protein localization to chromosome	24/1773	91/18862	2.32225e-06	2.72094e-05	2.01422e-05	221496/283489/1736/9183/54386/546/4436/6118/55920/55506/6117/10856/9184/9555/22948/7520/10574/10575/6950/7203/10576/7415/10694/3009	24
GO:1900182	BP	GO:1900182	positive regulation of protein localization to nucleus	23/1773	85/18862	2.3239e-06	2.72094e-05	2.01422e-05	11143/8882/57506/1736/7037/207/10204/5594/23435/7175/22948/3843/10574/10575/6950/7203/142/10576/11315/10694/5901/10155/2316	23
GO:0031330	BP	GO:0031330	negative regulation of cellular catabolic process	48/1773	255/18862	2.33538e-06	2.72857e-05	2.01987e-05	54888/81892/1676/2931/6386/1736/8473/4130/10605/7917/1459/207/1982/6599/23367/1153/9491/8667/1457/8241/23256/9097/51035/8148/6449/56893/7874/9554/6625/9967/23435/1996/1981/10128/6201/57805/1994/6135/9349/6125/10949/302/10492/2521/3184/11315/1660/3192	48
GO:0007004	BP	GO:0007004	telomere maintenance via telomerase	20/1773	68/18862	2.57059e-06	2.99069e-05	2.2139e-05	5394/55651/55226/1736/54386/4361/5594/10728/6117/22948/7520/10574/10575/6950/7203/10576/3178/3320/10694/3192	20
GO:0009145	BP	GO:0009145	purine nucleoside triphosphate biosynthetic process	20/1773	68/18862	2.57059e-06	2.99069e-05	2.2139e-05	8604/10165/30968/10632/4513/523/509/10476/522/539/515/3615/4830/142/498/7415/226/506/7114/5315	20
GO:0031396	BP	GO:0031396	regulation of protein ubiquitination	41/1773	205/18862	2.60905e-06	3.02804e-05	2.24156e-05	1020/408/57599/54165/10016/9320/23376/64359/2931/7337/8473/23640/5716/207/5300/29979/9373/23028/7332/3301/51160/9112/8452/51035/2280/6500/11338/6201/10075/55611/6135/7334/9349/6125/6187/6188/11315/3320/3309/3303/3304	41
GO:1900024	BP	GO:1900024	regulation of substrate adhesion-dependent cell spreading	18/1773	57/18862	2.6137e-06	3.02804e-05	2.24156e-05	3611/1398/1785/708/4192/2244/2192/10109/1399/2266/5879/23603/55920/5034/81/335/811/2316	18
GO:0051054	BP	GO:0051054	positive regulation of DNA metabolic process	40/1773	198/18862	2.65012e-06	3.06378e-05	2.26802e-05	131870/57599/581/1736/546/23347/7037/4204/5984/4361/207/5982/7874/5594/10728/4436/10097/7158/7334/7919/22948/7520/5111/10574/10575/2521/6950/7203/3184/142/6188/10576/3178/3320/10694/1660/5591/10155/3146/3181	40
GO:1901796	BP	GO:1901796	regulation of signal transduction by p53 class mediator	37/1773	177/18862	2.68252e-06	3.09474e-05	2.29093e-05	1020/1107/10269/112858/5571/4839/3065/53615/8805/5716/5931/5984/1459/4361/207/5982/5300/23028/10419/1457/1460/6119/4282/8148/9219/6118/6749/6201/6117/6135/3066/1655/9349/11198/5928/6125/3190	37
GO:0010833	BP	GO:0010833	telomere maintenance via telomere lengthening	22/1773	80/18862	2.85993e-06	3.29111e-05	2.4363e-05	5394/55651/55226/1736/54386/4361/5594/10728/6117/22948/7520/10574/10575/6950/7203/142/10576/3178/3320/10694/3192/3181	22
GO:0045638	BP	GO:0045638	negative regulation of myeloid cell differentiation	24/1773	92/18862	2.86469e-06	3.29111e-05	2.4363e-05	2551/79577/54623/8451/80349/6422/3149/4830/3276/3313/8294/8359/8360/8361/8362/8363/8364/8365/8366/8367/8368/8370/121504/554313	24
GO:0032784	BP	GO:0032784	regulation of DNA-templated transcription, elongation	17/1773	52/18862	2.89007e-06	3.31335e-05	2.45276e-05	11143/7469/79577/25920/51497/27336/6830/2962/284695/6829/10915/3150/10189/57805/11198/7919/3192	17
GO:0019318	BP	GO:0019318	hexose metabolic process	47/1773	250/18862	3.07139e-06	3.5139e-05	2.60122e-05	57486/10269/4351/26007/5091/23509/10580/2931/8604/2584/5214/283209/8473/10165/6576/207/2539/9852/6652/1737/55276/51181/5500/8402/5160/5162/2805/2932/230/7874/5499/2806/5236/5213/5211/1642/231/10327/4190/4191/2171/5223/226/5230/7167/3146/5315	47
GO:1902175	BP	GO:1902175	regulation of oxidative stress-induced intrinsic apoptotic signaling pathway	12/1773	28/18862	3.32647e-06	3.79783e-05	2.81141e-05	2876/207/6648/29979/10131/6647/5034/3315/142/6421/11315/4841	12
GO:0098876	BP	GO:0098876	vesicle-mediated transport to the plasma membrane	24/1773	93/18862	3.52056e-06	4.01111e-05	2.96929e-05	149371/23233/56850/55770/10640/9135/60412/4218/81609/112755/9559/6616/51699/1785/10890/3996/4905/10434/55737/403/7879/23499/10399/6711	24
GO:0006399	BP	GO:0006399	tRNA metabolic process	37/1773	179/18862	3.54172e-06	4.02688e-05	2.98096e-05	54888/112858/80755/84267/55226/29894/11157/55623/7453/833/1478/5859/8565/92675/4141/10056/2193/9255/3376/51637/2617/5917/51520/3735/283742/6897/2058/3028/7407/6301/51493/16/1653/1615/6741/5464/51504	37
GO:0043462	BP	GO:0043462	regulation of ATPase activity	22/1773	81/18862	3.58102e-06	4.06316e-05	3.00782e-05	51726/29128/481/10598/10294/483/3301/1785/3337/140735/23234/6742/6625/26097/5217/8775/4436/8655/2956/4171/1660/3192	22
GO:0034612	BP	GO:0034612	response to tumor necrosis factor	56/1773	320/18862	3.76391e-06	4.2619e-05	3.15494e-05	3611/5711/5721/5683/5714/5713/5716/10197/207/84817/5690/9491/5720/2937/9181/10213/3093/5710/5695/5684/5704/5702/9861/5694/5706/5718/5691/5700/5692/5709/5594/5705/5685/5719/5689/5686/5707/5682/5717/5688/6422/5693/5687/5708/5701/10594/9590/2950/10399/81/6188/335/1660/3303/3304/7114	56
GO:0030837	BP	GO:0030837	negative regulation of actin filament polymerization	19/1773	64/18862	3.90576e-06	4.40982e-05	3.26444e-05	57482/2314/11344/5756/822/29767/120/119/136319/5962/51571/5217/830/6712/118/829/832/6711/7114	19
GO:0150115	BP	GO:0150115	cell-substrate junction organization	26/1773	106/18862	3.91058e-06	4.40982e-05	3.26444e-05	5786/28956/57669/613/10580/10982/4035/10391/9748/23122/382/23332/3673/2017/5879/87/6422/23603/8826/387/55920/23499/7414/7094/2335/71	26
GO:0016482	BP	GO:0016482	cytosolic transport	35/1773	166/18862	4.03377e-06	4.53944e-05	3.36039e-05	9482/10652/5605/5868/112936/25930/29934/5604/63893/6643/9559/9043/23011/51479/51699/23085/164/79585/8724/11151/7874/160/5962/51552/5594/10097/55737/3799/7879/4478/1639/7430/1213/4133/2316	35
GO:1903578	BP	GO:1903578	regulation of ATP metabolic process	28/1773	119/18862	4.04318e-06	4.54074e-05	3.36136e-05	23279/5571/51024/8604/23165/348995/23636/55746/81929/8473/79902/28964/4927/8021/9631/8480/23225/3692/6396/9688/10059/4513/6472/7175/142/5223/7415/7114	28
GO:0051204	BP	GO:0051204	protein insertion into mitochondrial membrane	16/1773	48/18862	4.23328e-06	4.73491e-05	3.50509e-05	51079/55750/4836/25813/581/56993/9868/9141/7533/7529/3308/3320/7532/10971/7531/7534	16
GO:1990090	BP	GO:1990090	cellular response to nerve growth factor stimulus	16/1773	48/18862	4.23328e-06	4.73491e-05	3.50509e-05	867/6456/7337/207/382/10094/1398/1783/11151/988/4137/9775/6132/11075/3309/1938	16
GO:0002429	BP	GO:0002429	immune response-activating cell surface receptor signaling pathway	76/1773	481/18862	4.40169e-06	4.90041e-05	3.62761e-05	975/8891/7410/8893/26060/10006/5711/55198/581/5721/63916/5683/5714/5058/5713/7917/23191/5716/8454/1967/2885/10197/10093/10094/5690/9491/5720/10213/10092/1398/30968/5710/5695/5684/5567/26999/29085/5335/5704/5702/9861/5694/5706/5718/10552/5691/5700/5692/10109/5709/5594/10787/5705/5685/5719/1399/5689/6500/5686/10097/5879/5707/5682/5717/5688/5693/5687/5708/5701/10096/5062/7334/6188/3320/7430/71	76
GO:0002757	BP	GO:0002757	immune response-activating signal transduction	76/1773	481/18862	4.40169e-06	4.90041e-05	3.62761e-05	975/8891/7410/8893/26060/10006/5711/55198/581/5721/63916/5683/5714/5058/5713/7917/23191/5716/8454/1967/2885/10197/10093/10094/5690/9491/5720/10213/10092/1398/30968/5710/5695/5684/5567/26999/29085/5335/5704/5702/9861/5694/5706/5718/10552/5691/5700/5692/10109/5709/5594/10787/5705/5685/5719/1399/5689/6500/5686/10097/5879/5707/5682/5717/5688/5693/5687/5708/5701/10096/5062/7334/6188/3320/7430/71	76
GO:0006458	BP	GO:0006458	'de novo' protein folding	15/1773	43/18862	4.43468e-06	4.90041e-05	3.62761e-05	7266/3337/56886/2280/10728/3336/10808/3313/6767/10576/3309/3329/3303/3304/3312	15
GO:0006734	BP	GO:0006734	NADH metabolic process	15/1773	43/18862	4.43468e-06	4.90041e-05	3.62761e-05	8604/5214/283209/230/2820/5213/5211/4190/4191/5223/7415/226/5230/7167/5315	15
GO:0045454	BP	GO:0045454	cell redox homeostasis	15/1773	43/18862	4.43468e-06	4.90041e-05	3.62761e-05	23071/28964/2876/2936/7296/1738/23530/10935/10549/328/25824/9588/7295/7001/5052	15
GO:0098927	BP	GO:0098927	vesicle-mediated transport between endosomal compartments	15/1773	43/18862	4.43468e-06	4.90041e-05	3.62761e-05	9482/5605/5868/25930/29934/5604/23011/8724/11151/5962/5594/7879/4478/7430/2316	15
GO:0010256	BP	GO:0010256	endomembrane system organization	76/1773	482/18862	4.75615e-06	5.24511e-05	3.88278e-05	23325/149371/51100/10269/10142/6456/22930/6836/5605/25777/8266/55666/10972/8027/221496/439/9183/399687/8943/950/5604/80856/7917/7251/57698/25782/23344/5869/79188/207/10211/23122/7443/9798/10959/9631/54874/23332/51062/9146/51510/10419/9217/1191/51160/1785/7905/2010/10890/22872/8724/9688/22931/51534/6449/8615/5594/23435/10015/5515/23136/6647/55968/5862/23603/8815/10075/7879/488/5048/1639/309/5518/5…	76
GO:1903051	BP	GO:1903051	negative regulation of proteolysis involved in cellular protein catabolic process	19/1773	65/18862	5.0364e-06	5.54306e-05	4.10334e-05	6386/8473/4130/7917/1459/6599/9491/8667/1457/9097/51035/6449/7874/6201/57805/6135/9349/6125/11315	19
GO:0060560	BP	GO:0060560	developmental growth involved in morphogenesis	43/1773	225/18862	5.15753e-06	5.66505e-05	4.19364e-05	1020/6456/57669/57611/5532/10013/5058/23191/57698/4897/4035/9043/11344/53335/1630/25942/9798/23011/1982/6857/3897/9373/1785/9201/28988/2932/23327/2017/22902/6422/8826/4137/23499/7414/57142/2335/3320/1627/2664/10155/4133/1808/4131	43
GO:0050686	BP	GO:0050686	negative regulation of mRNA processing	12/1773	29/18862	5.18964e-06	5.68897e-05	4.21135e-05	10921/6829/8241/10284/708/6431/8683/6432/11338/5725/3190/3181	12
GO:2001243	BP	GO:2001243	negative regulation of intrinsic apoptotic signaling pathway	24/1773	95/18862	5.25938e-06	5.75395e-05	4.25946e-05	51060/51079/5770/3065/2876/4976/207/6648/23028/9181/1191/4722/3301/4282/55031/10131/7178/10525/57805/7417/3315/11315/4841/3303	24
GO:0033157	BP	GO:0033157	regulation of intracellular protein transport	46/1773	248/18862	5.65909e-06	6.17896e-05	4.57408e-05	1020/975/9747/51100/56850/5770/51024/8882/57506/4836/2931/23636/5058/4924/1459/10134/10204/5781/7332/10541/2010/5905/51569/2932/9141/5594/23435/22902/10055/3799/7175/10075/9520/7295/3843/7533/7529/11315/2664/5901/7532/10971/10155/2316/7531/7534	46
GO:0042177	BP	GO:0042177	negative regulation of protein catabolic process	28/1773	121/18862	5.70013e-06	6.21145e-05	4.59813e-05	6386/29934/1595/8473/4130/7917/1459/6599/5300/9491/8667/1457/9097/8724/51035/6449/7874/6625/6201/57805/5245/6135/9349/23450/6125/302/11315/2316	28
GO:0043903	BP	GO:0043903	regulation of biological process involved in symbiotic interaction	39/1773	197/18862	5.85353e-06	6.366e-05	4.71254e-05	23265/7469/5091/55770/5434/5586/3685/25920/57506/5432/51497/5610/5430/7251/2962/5437/51773/6780/23367/7153/6993/9217/6829/103/5431/8724/3838/51495/9218/8815/1642/7879/8091/7155/5034/3956/3609/1660/10155	39
GO:0006188	BP	GO:0006188	IMP biosynthetic process	7/1773	10/18862	5.95819e-06	6.46705e-05	4.78734e-05	158/3251/5471/5198/471/2618/10606	7
GO:0051701	BP	GO:0051701	biological process involved in interaction with host	42/1773	219/18862	6.03311e-06	6.53548e-05	4.83799e-05	975/867/23265/1948/5091/55770/3685/5610/950/57187/7251/7037/2885/9798/3839/3836/6993/9217/1525/3840/8724/3673/3838/3688/682/11331/1500/10189/5245/9218/1642/7879/7919/5034/3956/3837/3921/6950/4684/3303/3304/10155	42
GO:0090224	BP	GO:0090224	regulation of spindle organization	14/1773	39/18862	6.27556e-06	6.78476e-05	5.02253e-05	79187/23636/4733/8480/51510/1104/7175/1639/4926/1213/3303/3304/1778/3192	14
GO:1902117	BP	GO:1902117	positive regulation of organelle assembly	19/1773	66/18862	6.45413e-06	6.96414e-05	5.15531e-05	51100/22930/6386/23636/25782/2909/55704/8396/9908/10146/23019/10015/8655/10801/4478/989/4926/6624/1778	19
GO:0036465	BP	GO:0036465	synaptic vesicle recycling	20/1773	72/18862	6.76901e-06	7.2896e-05	5.39625e-05	1020/6456/56850/26052/5532/5868/9892/8943/23191/112755/8301/382/6857/9373/1785/10059/6455/821/801/808	20
GO:0019079	BP	GO:0019079	viral genome replication	29/1773	129/18862	7.16852e-06	7.70476e-05	5.70357e-05	5868/5586/57506/27336/5610/6780/23367/64710/7153/9217/6598/103/1487/51495/1488/5094/5245/9218/8815/7913/1642/5479/8091/7155/7415/3609/5093/10155/3312	29
GO:1902275	BP	GO:1902275	regulation of chromatin organization	37/1773	185/18862	7.87957e-06	8.45249e-05	6.25709e-05	408/11143/10269/54623/9320/55677/22938/546/8473/6830/55201/4204/4089/23168/84656/80349/25942/23028/6598/1786/3024/9733/1487/26097/6749/7175/3005/55611/10856/7334/9555/6418/8971/11315/10155/3009/3192	37
GO:0070198	BP	GO:0070198	protein localization to chromosome, telomeric region	12/1773	30/18862	7.91074e-06	8.46942e-05	6.26962e-05	1736/54386/546/9555/22948/7520/10574/10575/6950/7203/10576/10694	12
GO:1901607	BP	GO:1901607	alpha-amino acid biosynthetic process	19/1773	67/18862	8.22161e-06	8.78515e-05	6.50335e-05	60496/58478/8604/2752/5832/1719/22929/4507/63826/2805/875/102724560/6472/2806/29968/2746/4522/26227/11315	19
GO:0031397	BP	GO:0031397	negative regulation of protein ubiquitination	21/1773	79/18862	8.56103e-06	9.1301e-05	6.75871e-05	1020/408/9320/23376/64359/8473/207/9373/3301/51160/51035/11338/6201/55611/6135/9349/6125/6188/11315/3303/3304	21
GO:0006739	BP	GO:0006739	NADP metabolic process	13/1773	35/18862	8.71751e-06	9.2611e-05	6.85568e-05	133686/2539/55276/51181/4200/23530/25796/6888/5226/3417/3418/7086/5223	13
GO:0042407	BP	GO:0042407	cristae formation	13/1773	35/18862	8.71751e-06	9.2611e-05	6.85568e-05	25813/10939/3954/10632/54927/509/10476/522/539/515/10989/498/506	13
GO:0045022	BP	GO:0045022	early endosome to late endosome transport	14/1773	40/18862	8.82294e-06	9.35503e-05	6.92521e-05	9482/5605/5868/25930/29934/5604/23011/8724/5962/5594/7879/4478/7430/2316	14
GO:0120032	BP	GO:0120032	regulation of plasma membrane bounded cell projection assembly	37/1773	186/18862	8.96016e-06	9.48226e-05	7.0194e-05	26052/5868/9513/25940/23191/2909/375790/8087/11344/5756/382/54874/23580/55704/10152/1785/5898/7419/5962/10109/10787/5217/10097/5879/8655/23603/55920/10096/10801/2823/832/23224/4134/989/2596/6624/1809	37
GO:0090316	BP	GO:0090316	positive regulation of intracellular protein transport	36/1773	179/18862	9.12472e-06	9.63788e-05	7.13459e-05	1020/975/9747/51100/51024/8882/57506/4836/2931/5058/1459/10134/10204/7332/10541/2010/2932/9141/5594/23435/22902/10055/3799/7175/10075/9520/3843/7533/7529/5901/7532/10971/10155/2316/7531/7534	36
GO:0010821	BP	GO:0010821	regulation of mitochondrion organization	32/1773	151/18862	9.19422e-06	9.69268e-05	7.17516e-05	51024/4836/2931/10013/581/2876/7037/4976/5716/1459/207/1191/10059/10449/2932/10493/9141/51571/2017/55737/4137/10075/292/7416/7533/7529/11315/7532/10971/3303/7531/7534	32
GO:0061572	BP	GO:0061572	actin filament bundle organization	33/1773	158/18862	9.28164e-06	9.76613e-05	7.22954e-05	408/57175/64780/10580/83543/5058/57698/10391/23122/23332/55704/7791/8452/9124/7082/119/800/5962/5217/5879/87/6422/387/118/5062/7184/335/7430/6624/1809/2316/4082/71	33
GO:0051817	BP	GO:0051817	modulation of process of other organism involved in symbiotic interaction	24/1773	98/18862	9.35682e-06	9.82072e-05	7.26995e-05	5091/22938/3065/5610/3839/64710/3836/9217/6598/3840/10910/3838/6597/5702/23435/11331/5245/9218/5479/8091/302/3837/1072/3312	24
GO:0006997	BP	GO:0006997	nucleus organization	28/1773	124/18862	9.36921e-06	9.82072e-05	7.26995e-05	25909/10269/25777/8882/51280/221496/23165/55746/81929/79188/7443/9631/23760/51510/2010/9688/23435/5515/55968/7175/8815/6223/1639/26135/5518/57142/3148/4926	28
GO:0009896	BP	GO:0009896	positive regulation of catabolic process	71/1773	450/18862	9.46603e-06	9.90334e-05	7.3311e-05	975/51100/22930/26058/51079/5770/23376/79888/2931/23192/581/4898/7917/23640/5716/25782/26086/4035/207/9567/10134/51441/2773/23367/9698/10658/29978/29979/79068/8396/1191/6829/51160/1457/5976/5049/6923/23019/92140/2932/4905/6449/23327/5704/5702/5962/5700/9554/23530/23435/11331/55737/5701/10075/1642/7879/336/4478/7416/10399/8570/3184/10236/11315/7415/335/3320/7430/3303/3304/3146	71
GO:0030901	BP	GO:0030901	midbrain development	22/1773	86/18862	1.03265e-05	0.00010783	7.98232e-05	27089/7707/2539/57447/4722/1267/1340/522/8655/515/6422/387/2746/7533/3309/10971/801/805/808/10409/7531/1152	22
GO:0032799	BP	GO:0032799	low-density lipoprotein receptor particle metabolic process	8/1773	14/18862	1.07292e-05	0.000111402	8.24668e-05	1175/1211/1173/160/161/163/302/1213	8
GO:0032802	BP	GO:0032802	low-density lipoprotein particle receptor catabolic process	8/1773	14/18862	1.07292e-05	0.000111402	8.24668e-05	1175/1211/1173/160/161/163/302/1213	8
GO:1990173	BP	GO:1990173	protein localization to nucleoplasm	8/1773	14/18862	1.07292e-05	0.000111402	8.24668e-05	1736/22948/10574/10575/6950/7203/10576/10694	8
GO:0050769	BP	GO:0050769	positive regulation of neurogenesis	41/1773	217/18862	1.1288e-05	0.000116983	8.65985e-05	57611/23376/22938/3065/5362/5058/5604/23191/4976/57698/4035/6009/11344/9798/23011/1982/3897/23028/10419/23654/5764/10059/28988/4192/22902/10097/387/4137/51593/3066/4076/5803/23499/27339/7520/396/4673/2335/1627/2664/4131	41
GO:0060491	BP	GO:0060491	regulation of cell projection assembly	37/1773	188/18862	1.15408e-05	0.000119378	8.83712e-05	26052/5868/9513/25940/23191/2909/375790/8087/11344/5756/382/54874/23580/55704/10152/1785/5898/7419/5962/10109/10787/5217/10097/5879/8655/23603/55920/10096/10801/2823/832/23224/4134/989/2596/6624/1809	37
GO:0070987	BP	GO:0070987	error-free translesion synthesis	10/1773	22/18862	1.17722e-05	0.000121543	8.99739e-05	55666/5984/5982/5424/6119/6118/6117/5111/7415/6233	10
GO:0042744	BP	GO:0042744	hydrogen peroxide catabolic process	12/1773	31/18862	1.18054e-05	0.000121658	9.00593e-05	2876/847/23530/10935/10549/25824/9588/7001/3050/3046/5052/3047	12
GO:1900026	BP	GO:1900026	positive regulation of substrate adhesion-dependent cell spreading	14/1773	41/18862	1.22441e-05	0.000125943	9.32313e-05	3611/1398/1785/708/4192/2244/10109/1399/2266/5879/5034/335/811/2316	14
GO:0006740	BP	GO:0006740	NADPH regeneration	9/1773	18/18862	1.24273e-05	0.000127588	9.44493e-05	2539/55276/23530/25796/6888/5226/3417/7086/5223	9
GO:0032435	BP	GO:0032435	negative regulation of proteasomal ubiquitin-dependent protein catabolic process	13/1773	36/18862	1.24748e-05	0.000127837	9.46336e-05	6386/8473/4130/7917/6599/8667/9097/51035/6449/7874/57805/6135/11315	13
GO:0006081	BP	GO:0006081	cellular aldehyde metabolic process	18/1773	63/18862	1.26101e-05	0.000128984	9.54823e-05	8566/26007/3029/224/9380/2739/223/2098/2806/10327/6888/501/128/3417/3418/7086/11315/7167	18
GO:0010810	BP	GO:0010810	regulation of cell-substrate adhesion	41/1773	218/18862	1.26625e-05	0.00012928	9.57015e-05	5786/6251/5921/57669/3611/7264/4035/10391/9748/23122/8573/51144/23332/1398/1785/5764/6904/708/2932/4192/2244/2192/10109/1399/2266/5879/6422/23603/8826/387/55920/23499/7414/5034/3956/81/2335/335/811/2316/71	41
GO:0016925	BP	GO:0016925	protein sumoylation	21/1773	81/18862	1.30435e-05	0.000132677	9.82161e-05	23279/23165/348995/23636/55746/81929/79902/4927/53335/8021/9631/8480/23225/5905/9688/7329/10055/7175/10054/11315/10155	21
GO:1905897	BP	GO:1905897	regulation of response to endoplasmic reticulum stress	21/1773	81/18862	1.30435e-05	0.000132677	9.82161e-05	51060/5770/23376/581/7917/4976/10134/7873/10987/10959/29978/29979/1191/9097/51035/10961/6449/10399/11315/3309/3303	21
GO:0006278	BP	GO:0006278	RNA-dependent DNA biosynthetic process	20/1773	75/18862	1.32361e-05	0.000133894	9.91171e-05	5394/55651/55226/1736/54386/4361/5594/10728/6117/22948/7520/10574/10575/6950/7203/10576/3178/3320/10694/3192	20
GO:0006353	BP	GO:0006353	DNA-templated transcription, termination	20/1773	75/18862	1.32361e-05	0.000133894	9.91171e-05	10269/5434/29894/79869/6635/5430/8189/5437/51692/4686/6637/22803/81608/1478/6636/10419/11051/7343/6634/1660	20
GO:0006635	BP	GO:0006635	fatty acid beta-oxidation	20/1773	75/18862	1.32361e-05	0.000133894	9.91171e-05	51/10455/30/3033/5825/1666/6342/207/2109/3032/1891/1632/3295/10449/1892/2108/38/39/3028/3030	20
GO:0045010	BP	GO:0045010	actin nucleation	16/1773	52/18862	1.35346e-05	0.000136662	0.000101167	57175/23191/10093/10094/10788/10092/10152/2764/1496/11151/10552/10109/10787/10097/10096/375	16
GO:0035967	BP	GO:0035967	cellular response to topologically incorrect protein	34/1773	168/18862	1.39159e-05	0.000140255	0.000103826	55738/5770/9114/23376/2931/10013/51726/581/439/7917/10987/10959/1965/9217/8452/22872/56886/10525/118/3068/1639/7094/821/10130/3313/10399/7415/7184/811/3309/3329/3303/3304/3312	34
GO:0030307	BP	GO:0030307	positive regulation of cell growth	33/1773	161/18862	1.40406e-05	0.000141239	0.000104554	57611/6386/5058/23191/57698/5716/4035/207/4686/11344/9798/1982/5300/6857/3897/9373/84717/1457/55031/28988/23327/136319/1981/22902/6422/4137/23499/7919/2335/1627/2664/3009/4131	33
GO:0051017	BP	GO:0051017	actin filament bundle assembly	32/1773	154/18862	1.40649e-05	0.000141239	0.000104554	408/57175/64780/10580/83543/5058/10391/23122/23332/55704/7791/8452/9124/7082/119/800/5962/5217/5879/87/6422/387/118/5062/7184/335/7430/6624/1809/2316/4082/71	32
GO:0034249	BP	GO:0034249	negative regulation of cellular amide metabolic process	43/1773	234/18862	1.43192e-05	0.000143531	0.000106251	26058/9513/5610/7072/1719/8087/51441/23367/5300/9698/10658/1153/79068/5936/1965/1191/3692/5976/23019/3646/23521/10643/6472/23435/1981/10644/1656/2058/7175/6726/6252/4076/9775/10492/10399/8570/3184/57142/4691/10236/6188/811/3609	43
GO:0046394	BP	GO:0046394	carboxylic acid biosynthetic process	55/1773	327/18862	1.51322e-05	0.000151404	0.000112079	79966/586/5571/60496/84532/2628/5825/9415/58478/8604/2752/4706/6342/5832/2879/1719/2944/4507/63826/51144/9524/3692/9444/11160/4048/3295/8803/4282/873/2805/7360/51495/875/102724560/6472/10728/7358/301/2946/2806/3028/47/29968/11332/5947/10327/2746/2950/4522/26227/2171/11315/2194/335/5315	55
GO:0016053	BP	GO:0016053	organic acid biosynthetic process	56/1773	335/18862	1.52688e-05	0.000152494	0.000112886	79966/586/5571/60496/84532/2628/5825/9415/58478/8604/2752/4706/6342/5832/2879/1719/2944/22929/4507/63826/51144/9524/3692/9444/11160/4048/3295/8803/4282/873/2805/7360/51495/875/102724560/6472/10728/7358/301/2946/2806/3028/47/29968/11332/5947/10327/2746/2950/4522/26227/2171/11315/2194/335/5315	56
GO:0140014	BP	GO:0140014	mitotic nuclear division	51/1773	296/18862	1.56043e-05	0.000155562	0.000115157	84687/283489/80218/23636/9183/81929/546/7283/8260/27436/23122/7443/4733/64151/23244/5300/23332/51143/9918/51510/10419/23126/23047/2010/8452/7756/10592/1104/10051/6152/5515/11331/55968/8243/7175/10726/387/8815/9184/9126/10540/5902/9555/3837/5518/4926/5901/3303/3304/3192/2316	51
GO:1902369	BP	GO:1902369	negative regulation of RNA catabolic process	19/1773	70/18862	1.64291e-05	0.000163489	0.000121025	54888/81892/1736/10605/23367/1153/8241/8148/9967/23435/1996/10128/1994/10949/10492/2521/3184/1660/3192	19
GO:0017148	BP	GO:0017148	negative regulation of translation	39/1773	206/18862	1.74233e-05	0.000173069	0.000128117	26058/9513/5610/7072/1719/8087/51441/23367/9698/10658/1153/79068/5936/1965/3692/5976/23019/3646/23521/10643/6472/23435/1981/10644/1656/2058/7175/6726/4076/9775/10492/10399/8570/3184/4691/10236/6188/811/3609	39
GO:0051653	BP	GO:0051653	spindle localization	16/1773	53/18862	1.77077e-05	0.000175578	0.000129974	9183/23122/23332/6993/3996/3688/10097/55968/10096/5048/1639/4134/3837/4926/1778/1072	16
GO:2001020	BP	GO:2001020	regulation of response to DNA damage stimulus	41/1773	221/18862	1.7763e-05	0.000175809	0.000130145	131870/11143/10269/57599/84309/9320/5531/9513/54386/8451/23347/5716/8087/151987/23028/1191/4282/55031/56893/9774/7178/10097/6118/57805/4137/7913/55611/7158/1655/7334/7919/8091/5111/2521/142/6188/1660/5591/10155/3146/3190	41
GO:0097581	BP	GO:0097581	lamellipodium organization	22/1773	89/18862	1.85821e-05	0.000183586	0.000135902	7410/57175/79902/23191/6643/11344/5756/55704/10092/10152/1785/3688/2017/10109/10787/10097/5879/23603/10096/832/7414/6624	22
GO:0006297	BP	GO:0006297	nucleotide-excision repair, DNA gap filling	10/1773	23/18862	1.90737e-05	0.000187768	0.000138998	3978/5984/5982/5424/3980/6119/6118/6117/5111/6233	10
GO:0006541	BP	GO:0006541	glutamine metabolic process	10/1773	23/18862	1.90737e-05	0.000187768	0.000138998	2752/4204/56474/56954/5471/8833/1503/5198/2746/26227	10
GO:0045652	BP	GO:0045652	regulation of megakaryocyte differentiation	21/1773	83/18862	1.95392e-05	0.000192007	0.000142136	2551/3065/57095/25942/3692/3276/3148/8294/8359/8360/8361/8362/8363/8364/8365/8366/8367/8368/8370/121504/554313	21
GO:0051205	BP	GO:0051205	protein insertion into membrane	20/1773	77/18862	2.02069e-05	0.000197299	0.000146054	51079/55750/8266/4836/25813/581/439/7917/56993/6449/9868/9141/7533/7529/3308/3320/7532/10971/7531/7534	20
GO:1903363	BP	GO:1903363	negative regulation of cellular protein catabolic process	20/1773	77/18862	2.02069e-05	0.000197299	0.000146054	6386/8473/4130/7917/1459/6599/9491/8667/1457/9097/51035/6449/7874/6201/57805/6135/9349/6125/302/11315	20
GO:0010257	BP	GO:0010257	NADH dehydrogenase complex assembly	18/1773	65/18862	2.02211e-05	0.000197299	0.000146054	126328/4709/4728/51079/4704/4723/91942/4698/4706/4712/4702/4705/4724/55967/4729/4720/4722/4719	18
GO:0032981	BP	GO:0032981	mitochondrial respiratory chain complex I assembly	18/1773	65/18862	2.02211e-05	0.000197299	0.000146054	126328/4709/4728/51079/4704/4723/91942/4698/4706/4712/4702/4705/4724/55967/4729/4720/4722/4719	18
GO:0042398	BP	GO:0042398	cellular modified amino acid biosynthetic process	15/1773	48/18862	2.03609e-05	0.000198311	0.000146803	1159/548596/2628/3029/1719/79017/2937/223/471/2618/55748/501/4522/11315/1152	15
GO:0050851	BP	GO:0050851	antigen receptor-mediated signaling pathway	54/1773	323/18862	2.14442e-05	0.000208494	0.000154341	975/8891/8893/5711/581/5721/5683/5714/5058/5713/5716/8454/1967/10197/5690/9491/5720/10213/30968/5710/5695/5684/29085/5335/5704/5702/9861/5694/5706/5718/5691/5700/5692/5709/5594/5705/5685/5719/1399/5689/6500/5686/5707/5682/5717/5688/5693/5687/5708/5701/5062/7334/6188/7430	54
GO:0050792	BP	GO:0050792	regulation of viral process	36/1773	186/18862	2.20278e-05	0.00021379	0.000158262	7469/5091/5434/5586/25920/57506/5432/51497/5610/5430/7251/2962/5437/51773/6780/23367/7153/6993/9217/6829/103/5431/8724/3838/51495/9218/8815/1642/7879/8091/7155/5034/3956/3609/1660/10155	36
GO:0000027	BP	GO:0000027	ribosomal large subunit assembly	11/1773	28/18862	2.32419e-05	0.000223994	0.000165815	6169/22907/4839/6128/6134/6152/6135/6147/6122/6125/6175	11
GO:0000470	BP	GO:0000470	maturation of LSU-rRNA	11/1773	28/18862	2.32419e-05	0.000223994	0.000165815	55759/55651/8886/4839/11224/26156/3692/4809/4736/6129/6130	11
GO:0008053	BP	GO:0008053	mitochondrial fusion	11/1773	28/18862	2.32419e-05	0.000223994	0.000165815	51024/54332/581/7037/4976/10939/30968/10059/54927/10493/10075	11
GO:0061620	BP	GO:0061620	glycolytic process through glucose-6-phosphate	11/1773	28/18862	2.32419e-05	0.000223994	0.000165815	2584/5214/283209/230/5213/5211/5223/226/5230/7167/5315	11
GO:0009636	BP	GO:0009636	response to toxic substance	43/1773	239/18862	2.4416e-05	0.000234897	0.000173887	1788/9446/64359/5445/581/2876/2936/2879/4357/1719/51780/847/2944/6648/84817/642/7296/23028/1267/2947/84293/23256/8683/5594/23530/2098/2946/6647/10935/10549/25824/10327/9588/128/7295/2950/11315/7001/3050/3046/5052/3047/4131	43
GO:0043489	BP	GO:0043489	RNA stabilization	17/1773	60/18862	2.46298e-05	0.00023654	0.000175103	54888/1736/10605/23367/1153/8241/8148/9967/23435/1996/1994/10949/10492/2521/3184/1660/3192	17
GO:0045807	BP	GO:0045807	positive regulation of endocytosis	23/1773	97/18862	2.49996e-05	0.000239674	0.000177422	408/867/55681/26060/55198/7251/4035/10211/23011/51479/3092/1191/51160/1785/10059/6455/3673/23327/160/163/375/302/3190	23
GO:0000018	BP	GO:0000018	regulation of DNA recombination	24/1773	104/18862	2.7181e-05	0.000260134	0.000192568	57599/5531/54386/6830/23347/7037/4361/151987/23028/3836/3024/3838/56893/4436/10097/6118/10189/2956/3005/7158/2521/8971/142/3009	24
GO:0072329	BP	GO:0072329	monocarboxylic acid catabolic process	28/1773	131/18862	2.76019e-05	0.000263704	0.000195211	51/10455/30/3033/5825/1666/5096/6342/5095/207/224/6652/2109/3032/51181/1891/1632/3295/10449/1892/2108/1381/38/39/3028/3030/10327/5226	28
GO:0048284	BP	GO:0048284	organelle fusion	30/1773	145/18862	2.80884e-05	0.000267886	0.000198307	9482/51024/4218/54332/581/7037/112755/4976/10939/2773/51479/6616/6857/8417/8396/30968/23673/10059/6812/11151/54927/8615/10493/9554/301/3799/10075/7879/302/811	30
GO:0045921	BP	GO:0045921	positive regulation of exocytosis	21/1773	85/18862	2.88055e-05	0.000273777	0.000202668	1020/23413/84932/7447/5868/8027/6386/7251/23122/6857/23332/164/9146/8618/10059/6812/2244/10015/2266/7879/375	21
GO:0048041	BP	GO:0048041	focal adhesion assembly	21/1773	85/18862	2.88055e-05	0.000273777	0.000202668	5786/57669/613/10580/4035/10391/9748/23122/23332/3673/2017/5879/87/6422/23603/8826/387/55920/23499/7414/71	21
GO:0006110	BP	GO:0006110	regulation of glycolytic process	20/1773	79/18862	3.03035e-05	0.000287517	0.000212839	23279/5571/23165/348995/23636/55746/81929/8473/79902/28964/4927/8021/9631/8480/23225/3692/6396/9688/7175/5223	20
GO:0008631	BP	GO:0008631	intrinsic apoptotic signaling pathway in response to oxidative stress	14/1773	44/18862	3.04955e-05	0.000288841	0.000213819	56616/2876/207/10550/6648/29979/10131/6647/5034/3315/142/6421/11315/4841	14
GO:0090114	BP	GO:0090114	COPII-coated vesicle budding	19/1773	73/18862	3.1327e-05	0.000296207	0.000219272	5537/10016/10972/55291/10959/9217/9632/81876/23256/8452/22872/6396/10484/4905/8615/10342/9554/8775/9218	19
GO:0036498	BP	GO:0036498	IRE1-mediated unfolded protein response	18/1773	67/18862	3.16882e-05	0.000299108	0.00022142	55738/5770/9114/23376/2931/51726/581/439/10987/9217/22872/10525/118/3068/1639/7094/10130/3309	18
GO:0006892	BP	GO:0006892	post-Golgi vesicle-mediated transport	24/1773	105/18862	3.21355e-05	0.000302811	0.000224161	149371/23233/55770/10640/10067/9135/60412/8943/51479/164/79585/1785/23256/10890/3996/4905/10434/160/51552/9522/403/23499/10399/6711	24
GO:0071481	BP	GO:0071481	cellular response to X-ray	7/1773	12/18862	3.31716e-05	0.000311507	0.000230598	64710/1785/6422/7158/7520/8091/2547	7
GO:1905907	BP	GO:1905907	negative regulation of amyloid fibril formation	7/1773	12/18862	3.31716e-05	0.000311507	0.000230598	5203/10471/1191/7411/5201/5202/5204	7
GO:0006284	BP	GO:0006284	base-excision repair	13/1773	39/18862	3.35194e-05	0.000313703	0.000232224	3978/5424/3980/6119/55031/6118/6117/10075/328/8091/5111/6188/3146	13
GO:0051084	BP	GO:0051084	'de novo' posttranslational protein folding	13/1773	39/18862	3.35194e-05	0.000313703	0.000232224	7266/3337/56886/10728/3336/10808/3313/6767/10576/3309/3303/3304/3312	13
GO:0061615	BP	GO:0061615	glycolytic process through fructose-6-phosphate	11/1773	29/18862	3.42739e-05	0.000320219	0.000237047	2584/5214/283209/230/5213/5211/5223/226/5230/7167/5315	11
GO:0006450	BP	GO:0006450	regulation of translational fidelity	9/1773	20/18862	3.60637e-05	0.000335234	0.000248163	80755/92675/3376/51520/1968/6203/7407/6193/16	9
GO:0031498	BP	GO:0031498	chromatin disassembly	9/1773	20/18862	3.60637e-05	0.000335234	0.000248163	55201/6599/6605/6598/8289/6597/6601/11198/6418	9
GO:0032986	BP	GO:0032986	protein-DNA complex disassembly	9/1773	20/18862	3.60637e-05	0.000335234	0.000248163	6599/6605/6598/8289/6597/6601/9349/11198/6418	9
GO:1990778	BP	GO:1990778	protein localization to cell periphery	54/1773	329/18862	3.61461e-05	0.000335433	0.00024831	1020/975/9482/26060/56850/8642/9135/10580/4682/84687/2319/10082/23114/4218/10243/112755/8301/4035/207/10211/23122/382/481/10550/10959/6616/8417/2037/55704/483/10890/2035/1173/10484/4905/6812/3688/10434/5962/682/55737/23136/4301/3799/403/7879/2239/23499/10399/6711/4926/7430/1213/2316	54
GO:0006103	BP	GO:0006103	2-oxoglutarate metabolic process	8/1773	16/18862	3.86999e-05	0.000358527	0.000265406	1743/56267/4967/1738/2805/2806/3417/3418	8
GO:1903793	BP	GO:1903793	positive regulation of anion transport	72/1773	478/18862	4.00369e-05	0.000370291	0.000274114	1020/975/9747/51100/22930/7447/26060/5532/10580/51024/8882/57506/4836/10972/2931/25930/399687/5058/6342/7251/4035/1459/207/10134/382/6857/10204/5781/7332/10541/51160/2010/11052/10059/9255/2932/6812/29085/3688/2244/6717/9141/5594/23435/5019/22902/2266/5879/10055/3799/8655/7175/10075/9520/1622/2746/375/3843/302/7533/10399/7529/335/7430/1660/5901/7532/10971/10155/2316/7531/7534	72
GO:0007044	BP	GO:0007044	cell-substrate junction assembly	23/1773	100/18862	4.19443e-05	0.000386632	0.000286211	5786/57669/613/10580/4035/10391/9748/23122/23332/3673/2017/5879/87/6422/23603/8826/387/55920/23499/7414/7094/2335/71	23
GO:0030219	BP	GO:0030219	megakaryocyte differentiation	23/1773	100/18862	4.19443e-05	0.000386632	0.000286211	2551/79876/3065/57095/25942/5781/3692/3276/3148/8294/8359/8360/8361/8362/8363/8364/8365/8366/8367/8368/8370/121504/554313	23
GO:0031056	BP	GO:0031056	regulation of histone modification	29/1773	141/18862	4.2523e-05	0.000391311	0.000289674	408/11143/10269/54623/9320/55677/22938/546/8473/6830/4204/4089/23168/84656/80349/25942/23028/6598/1786/9733/1487/26097/55611/10856/7334/9555/6418/11315/3009	29
GO:0032206	BP	GO:0032206	positive regulation of telomere maintenance	15/1773	51/18862	4.53053e-05	0.000416218	0.000308112	1736/546/4361/5594/22948/7520/10574/10575/6950/7203/3184/10576/3178/10694/3181	15
GO:0034620	BP	GO:0034620	cellular response to unfolded protein	30/1773	149/18862	4.81498e-05	0.000441614	0.000326912	55738/5770/9114/23376/2931/51726/581/439/10987/10959/1965/9217/22872/10525/118/3068/1639/7094/821/10130/3313/10399/7415/7184/811/3309/3329/3303/3304/3312	30
GO:0150116	BP	GO:0150116	regulation of cell-substrate junction organization	18/1773	69/18862	4.86058e-05	0.000445055	0.000329459	5786/28956/57669/10982/4035/9748/23122/382/23332/5879/6422/23603/8826/387/55920/23499/7414/71	18
GO:0006369	BP	GO:0006369	termination of RNA polymerase II transcription	12/1773	35/18862	4.88866e-05	0.000446882	0.000330812	29894/79869/6635/8189/51692/4686/6637/81608/1478/6636/11051/6634	12
GO:0070849	BP	GO:0070849	response to epidermal growth factor	14/1773	46/18862	5.31717e-05	0.000485247	0.000359212	867/5782/8882/84687/207/5781/4141/5335/5594/7175/8826/4176/2950/1915	14
GO:0097711	BP	GO:0097711	ciliary basal body-plasma membrane docking	22/1773	95/18862	5.47024e-05	0.000498389	0.000368941	10142/95681/7283/11258/5577/23332/10382/1781/9793/8655/10121/22919/10540/5048/1639/5518/3320/7532/1778/203068/10383/7531	22
GO:0071897	BP	GO:0071897	DNA biosynthetic process	36/1773	194/18862	5.5899e-05	0.00050845	0.000376388	3978/55666/5394/55651/55226/1736/54386/5984/4361/5982/5424/3980/9100/6119/5594/10728/6118/5245/6117/7919/22948/7520/5111/10574/10575/6950/7203/3184/10576/3178/7415/3320/10694/3192/6233/3181	36
GO:0009070	BP	GO:0009070	serine family amino acid biosynthetic process	9/1773	21/18862	5.78524e-05	0.000524484	0.000388258	1719/22929/63826/875/102724560/6472/29968/4522/26227	9
GO:0009168	BP	GO:0009168	purine ribonucleoside monophosphate biosynthetic process	9/1773	21/18862	5.78524e-05	0.000524484	0.000388258	158/3251/5471/8833/5198/471/2618/3615/10606	9
GO:0048255	BP	GO:0048255	mRNA stabilization	15/1773	52/18862	5.81853e-05	0.000526634	0.000389849	10605/23367/1153/8241/8148/9967/23435/1996/1994/10949/10492/2521/3184/1660/3192	15
GO:0030865	BP	GO:0030865	cortical cytoskeleton organization	16/1773	58/18862	6.06671e-05	0.000548196	0.000405811	1020/388/114793/382/2037/2035/3996/10787/10015/5879/23136/387/9948/7094/811/7430	16
GO:0044786	BP	GO:0044786	cell cycle DNA replication	17/1773	64/18862	6.10306e-05	0.000550576	0.000407573	10269/3978/8882/546/5984/5982/5424/5976/6119/6118/6117/4174/4176/4175/5111/4172/4171	17
GO:0030010	BP	GO:0030010	establishment of cell polarity	28/1773	137/18862	6.43215e-05	0.000579315	0.000428847	2319/9183/399687/5058/81609/57698/382/23332/6993/1398/10890/2932/3996/3688/51571/1399/22902/55968/387/4478/5048/1639/4134/10399/4926/3320/6624/4131	28
GO:0006282	BP	GO:0006282	regulation of DNA repair	27/1773	130/18862	6.45278e-05	0.000580223	0.00042952	131870/11143/57599/84309/9320/5531/54386/8451/23347/151987/23028/56893/10097/6118/7913/55611/7158/7334/8091/5111/2521/142/6188/1660/5591/10155/3146	27
GO:0098789	BP	GO:0098789	pre-mRNA cleavage required for polyadenylation	7/1773	13/18862	6.60233e-05	0.000592701	0.000438757	29894/79869/4686/81608/1478/11052/11051	7
GO:0032801	BP	GO:0032801	receptor catabolic process	12/1773	36/18862	6.70925e-05	0.000600342	0.000444413	1020/51100/1175/5770/823/1211/1173/160/161/163/302/1213	12
GO:1904358	BP	GO:1904358	positive regulation of telomere maintenance via telomere lengthening	12/1773	36/18862	6.70925e-05	0.000600342	0.000444413	1736/5594/22948/7520/10574/10575/6950/7203/10576/3178/10694/3181	12
GO:0032786	BP	GO:0032786	positive regulation of DNA-templated transcription, elongation	10/1773	26/18862	6.80468e-05	0.000607892	0.000450002	11143/79577/6830/2962/6829/10915/3150/10189/11198/7919	10
GO:0048285	BP	GO:0048285	organelle fission	72/1773	486/18862	6.87464e-05	0.000613147	0.000453892	26052/51024/84687/283489/54332/80218/23236/23636/9183/81929/546/7283/8260/7917/4976/4361/27436/23122/7443/4733/64151/23244/5300/23332/51143/9918/5573/51510/7153/10419/23126/1785/23047/2010/8452/7756/10059/10592/1104/10051/51571/347688/6152/5719/5515/11331/10097/55737/55968/8243/7175/23603/10726/387/4137/8815/10096/9184/9126/10540/5902/9555/7155/3837/5518/4926/811/5901/3303/3304/3192/2316	72
GO:0008652	BP	GO:0008652	cellular amino acid biosynthetic process	19/1773	77/18862	6.93881e-05	0.000617868	0.000457387	586/60496/58478/8604/2752/5832/1719/4507/63826/2805/875/102724560/6472/2806/29968/2746/4522/26227/11315	19
GO:0016569	BP	GO:0016569	covalent chromatin modification	69/1773	461/18862	7.0211e-05	0.000624186	0.000462064	1020/408/11143/9329/8450/10269/1788/8295/79577/54623/283248/9320/55677/23376/10498/10013/22938/80218/3065/53615/546/8473/6830/80335/2091/4204/4089/23168/84656/80349/51780/25942/7443/29128/79718/9031/23028/10419/6598/1786/23170/9112/9733/5536/8520/1487/7874/26097/9219/86/6500/8607/5245/10432/10075/55611/1642/10856/3066/7334/9555/6418/3276/8091/6421/11315/51504/10155/3009	69
GO:0048278	BP	GO:0048278	vesicle docking	17/1773	65/18862	7.5484e-05	0.000668903	0.000495166	9482/23233/11311/10652/60412/4218/112755/6616/6857/8417/23673/23256/10890/4905/6812/8615/1488	17
GO:2000573	BP	GO:2000573	positive regulation of DNA biosynthetic process	17/1773	65/18862	7.5484e-05	0.000668903	0.000495166	1736/5984/5982/5594/10728/7919/22948/7520/5111/10574/10575/6950/7203/10576/3178/3320/10694	17
GO:0033260	BP	GO:0033260	nuclear DNA replication	16/1773	59/18862	7.60484e-05	0.000672821	0.000498066	10269/3978/546/5984/5982/5424/5976/6119/6118/6117/4174/4176/4175/5111/4172/4171	16
GO:0030838	BP	GO:0030838	positive regulation of actin filament polymerization	22/1773	97/18862	7.64089e-05	0.000673843	0.000498823	57175/57482/23191/2885/382/10093/10094/10788/23580/10092/10152/2764/1496/11151/10552/2017/10109/10787/5217/10097/10096/375	22
GO:0050773	BP	GO:0050773	regulation of dendrite development	22/1773	97/18862	7.64089e-05	0.000673843	0.000498823	57118/10498/2931/23098/23191/4976/53335/1630/382/23011/1398/5764/10059/28988/2932/23327/1399/10097/8826/4076/7533/1627	22
GO:0017157	BP	GO:0017157	regulation of exocytosis	36/1773	197/18862	7.77367e-05	0.000684456	0.000506679	1020/23413/84932/22930/7447/5868/64780/8027/4218/6386/28964/7251/112755/23122/23011/6857/23332/164/9146/8618/10890/10059/5898/2932/4905/6812/2244/10015/301/2266/7879/375/488/4735/801/808	36
GO:0000082	BP	GO:0000082	G1/S transition of mitotic cell cycle	46/1773	275/18862	8.35395e-05	0.000734374	0.000543632	1020/8450/586/4849/26060/5537/79577/8882/10498/55198/23236/581/8065/5721/8453/8451/8454/10197/207/5356/1719/6241/2935/5720/5471/6119/8452/23019/1104/5962/2273/6194/1981/301/6118/6117/328/4174/4176/3276/4175/5111/4172/4171/4678/5591	46
GO:0019319	BP	GO:0019319	hexose biosynthetic process	21/1773	91/18862	8.45557e-05	0.000740939	0.000548492	57486/5091/8604/8473/10165/6576/6652/8402/2805/230/7874/2806/5236/1642/231/4190/4191/5223/226/5230/7167	21
GO:1903321	BP	GO:1903321	negative regulation of protein modification by small protein conjugation or removal	21/1773	91/18862	8.45557e-05	0.000740939	0.000548492	1020/408/9320/23376/64359/8473/207/9373/3301/51160/51035/11338/6201/55611/6135/9349/6125/6188/11315/3303/3304	21
GO:0006575	BP	GO:0006575	cellular modified amino acid metabolic process	36/1773	198/18862	8.65746e-05	0.000757425	0.000560696	1159/548596/60496/2628/9446/2941/54332/3029/8836/2876/2936/1719/2539/2944/10550/79017/2937/2947/2739/223/6472/471/2946/6647/2618/2806/55748/501/1192/191/1937/2950/3417/4522/11315/1152	36
GO:0051293	BP	GO:0051293	establishment of spindle localization	14/1773	48/18862	8.93519e-05	0.000780279	0.000577614	9183/23122/23332/6993/3996/3688/55968/5048/1639/4134/3837/4926/1778/1072	14
GO:0032069	BP	GO:0032069	regulation of nuclease activity	9/1773	22/18862	8.97541e-05	0.000780279	0.000577614	1676/207/6059/5111/3148/6188/4869/3303/3146	9
GO:0042776	BP	GO:0042776	mitochondrial ATP synthesis coupled proton transport	9/1773	22/18862	8.97541e-05	0.000780279	0.000577614	30968/10632/509/10476/522/539/515/498/506	9
GO:0051131	BP	GO:0051131	chaperone-mediated protein complex assembly	9/1773	22/18862	8.97541e-05	0.000780279	0.000577614	10471/1191/9361/10728/3308/10576/3320/3329/3303	9
GO:0006296	BP	GO:0006296	nucleotide-excision repair, DNA incision, 5'-to lesion	12/1773	37/18862	9.08567e-05	0.000786139	0.000581952	8450/8451/5984/5982/5424/6119/6118/6117/1642/5111/142/6233	12
GO:0031111	BP	GO:0031111	negative regulation of microtubule polymerization or depolymerization	12/1773	37/18862	9.08567e-05	0.000786139	0.000581952	10013/50810/23122/23332/9181/6904/10382/2288/11075/22919/4133/4131	12
GO:1902745	BP	GO:1902745	positive regulation of lamellipodium organization	12/1773	37/18862	9.08567e-05	0.000786139	0.000581952	57175/23191/11344/10152/1785/10109/10787/10097/5879/23603/10096/6624	12
GO:0016570	BP	GO:0016570	histone modification	67/1773	448/18862	9.10699e-05	0.000786747	0.000582402	1020/408/11143/9329/8450/10269/8295/79577/54623/283248/9320/55677/23376/10498/10013/22938/80218/3065/53615/546/8473/6830/80335/2091/4204/4089/23168/84656/80349/51780/25942/7443/29128/79718/9031/23028/10419/6598/1786/23170/9112/9733/5536/8520/1487/7874/26097/9219/86/6500/8607/5245/10432/10075/55611/1642/10856/3066/7334/9555/6418/3276/8091/6421/11315/51504/3009	67
GO:0048207	BP	GO:0048207	vesicle targeting, rough ER to cis-Golgi	17/1773	66/18862	9.28657e-05	0.00079975	0.000592028	5537/10016/10972/55291/10959/9632/81876/23256/8452/22872/6396/10484/4905/8615/10342/9554/8775	17
GO:0048208	BP	GO:0048208	COPII vesicle coating	17/1773	66/18862	9.28657e-05	0.00079975	0.000592028	5537/10016/10972/55291/10959/9632/81876/23256/8452/22872/6396/10484/4905/8615/10342/9554/8775	17
GO:0019395	BP	GO:0019395	fatty acid oxidation	23/1773	105/18862	9.37946e-05	0.000806487	0.000597015	51/10455/30/3033/5825/1666/55198/6342/207/224/2109/3032/1891/1632/3295/10449/1892/2108/38/39/3028/3030/128	23
GO:1904356	BP	GO:1904356	regulation of telomere maintenance via telomere lengthening	16/1773	60/18862	9.47461e-05	0.000813397	0.00060213	5394/55226/1736/5594/22948/7520/10574/10575/6950/7203/142/10576/3178/10694/3192/3181	16
GO:0000819	BP	GO:0000819	sister chromatid segregation	36/1773	199/18862	9.63112e-05	0.000825546	0.000611123	283489/80218/23636/9183/81929/546/7283/8260/4361/27436/64151/23244/51143/9918/51510/7153/23126/23047/8452/7756/10592/10051/11331/8243/7175/10726/9184/9126/10540/9555/7155/3837/6421/4926/5901/3192	36
GO:0006735	BP	GO:0006735	NADH regeneration	10/1773	27/18862	9.90049e-05	0.000842077	0.000623361	5214/283209/230/5213/5211/5223/226/5230/7167/5315	10
GO:0015985	BP	GO:0015985	energy coupled proton transport, down electrochemical gradient	10/1773	27/18862	9.90049e-05	0.000842077	0.000623361	30968/10632/523/509/10476/522/539/515/498/506	10
GO:0015986	BP	GO:0015986	ATP synthesis coupled proton transport	10/1773	27/18862	9.90049e-05	0.000842077	0.000623361	30968/10632/523/509/10476/522/539/515/498/506	10
GO:0061621	BP	GO:0061621	canonical glycolysis	10/1773	27/18862	9.90049e-05	0.000842077	0.000623361	5214/283209/230/5213/5211/5223/226/5230/7167/5315	10
GO:0061718	BP	GO:0061718	glucose catabolic process to pyruvate	10/1773	27/18862	9.90049e-05	0.000842077	0.000623361	5214/283209/230/5213/5211/5223/226/5230/7167/5315	10
GO:0009113	BP	GO:0009113	purine nucleobase biosynthetic process	6/1773	10/18862	0.000102935	0.000872804	0.000646107	3251/5471/8833/6472/2618/10606	6
GO:0032070	BP	GO:0032070	regulation of deoxyribonuclease activity	6/1773	10/18862	0.000102935	0.000872804	0.000646107	1676/207/5111/6188/4869/3146	6
GO:0000413	BP	GO:0000413	protein peptidyl-prolyl isomerization	13/1773	43/18862	0.000105588	0.000893926	0.000661743	23770/5524/23398/53938/9049/5303/2286/5300/51645/2287/2280/2288/5479	13
GO:0034329	BP	GO:0034329	cell junction assembly	64/1773	425/18862	0.000105885	0.00089506	0.000662582	1020/5786/57669/1948/6801/26052/8642/613/5586/3611/10580/10082/421/10160/4204/4897/4035/10391/375790/9748/10211/23122/382/23332/83660/183/23654/7082/119/92140/6904/3673/28988/2017/10015/1981/1399/55737/5879/23136/1500/87/4301/6712/6422/23603/8826/387/55920/9948/829/2823/2239/5062/23499/7414/7094/1495/2596/2335/6624/2316/4131/71	64
GO:0033143	BP	GO:0033143	regulation of intracellular steroid hormone receptor signaling pathway	18/1773	73/18862	0.000107846	0.000910243	0.000673822	23376/79876/10498/10013/9667/3065/5058/23019/5536/51569/6597/11331/6422/5245/1655/142/11315/811	18
GO:0009062	BP	GO:0009062	fatty acid catabolic process	23/1773	106/18862	0.000109287	0.000919579	0.000680733	51/10455/30/3033/5825/1666/5096/6342/5095/207/224/2109/3032/1891/1632/3295/10449/1892/2108/38/39/3028/3030	23
GO:0120034	BP	GO:0120034	positive regulation of plasma membrane bounded cell projection assembly	23/1773	106/18862	0.000109287	0.000919579	0.000680733	26052/25940/23191/2909/375790/11344/54874/23580/55704/10152/1785/5898/10109/10787/10097/5879/8655/10096/10801/2823/989/6624/1809	23
GO:0006337	BP	GO:0006337	nucleosome disassembly	8/1773	18/18862	0.000110789	0.000927964	0.00068694	6599/6605/6598/8289/6597/6601/11198/6418	8
GO:0048268	BP	GO:0048268	clathrin coat assembly	8/1773	18/18862	0.000110789	0.000927964	0.00068694	1175/9892/1212/8301/3092/1211/163/1213	8
GO:0070200	BP	GO:0070200	establishment of protein localization to telomere	8/1773	18/18862	0.000110789	0.000927964	0.00068694	1736/22948/10574/10575/6950/7203/10576/10694	8
GO:0031331	BP	GO:0031331	positive regulation of cellular catabolic process	59/1773	384/18862	0.000111198	0.000929976	0.00068843	975/51100/22930/26058/5770/23376/2931/581/4898/7917/23640/5716/25782/26086/4035/207/9567/10134/51441/2773/23367/9698/10658/29978/29979/79068/8396/1191/6829/5976/5049/6923/23019/92140/2932/6449/5704/5702/5962/5700/23530/23435/11331/55737/5701/4478/7416/10399/8570/3184/10236/11315/7415/335/3320/7430/3303/3304/3146	59
GO:0030518	BP	GO:0030518	intracellular steroid hormone receptor signaling pathway	24/1773	113/18862	0.000111576	0.000931719	0.00068972	23376/79876/10498/10013/7337/9667/3065/5058/3301/8289/23019/5536/51569/6597/11331/6422/5245/6294/1655/7533/142/11315/811/10521	24
GO:1905477	BP	GO:1905477	positive regulation of protein localization to membrane	26/1773	127/18862	0.00011226	0.000936014	0.000692899	1020/975/9747/10580/51024/84687/4836/5058/23184/4035/207/382/5764/3688/9141/3799/163/7533/10399/7529/6711/7430/7532/10971/7531/7534	26
GO:1900542	BP	GO:1900542	regulation of purine nucleotide metabolic process	25/1773	120/18862	0.000112508	0.000936659	0.000693377	23279/5571/8604/23165/348995/23636/55746/81929/8473/79902/28964/4927/8021/9631/8480/23225/3692/6396/9688/4513/7175/142/5223/7415/7114	25
GO:0031060	BP	GO:0031060	regulation of histone methylation	16/1773	61/18862	0.000117347	0.000973995	0.000721015	54623/55677/22938/546/8473/6830/4204/4089/23168/80349/23028/6598/1786/26097/9555/3009	16
GO:0046824	BP	GO:0046824	positive regulation of nucleocytoplasmic transport	16/1773	61/18862	0.000117347	0.000973995	0.000721015	8882/57506/10204/10541/2010/11052/2932/5594/23435/7175/3843/1660/5901/10155/2316/7531	16
GO:0043434	BP	GO:0043434	response to peptide hormone	65/1773	435/18862	0.000118123	0.000978961	0.000724691	8891/5786/51382/8893/26060/5770/9114/10580/528/2931/4218/6430/55198/1537/51606/8473/5058/8836/23191/4976/1967/2885/207/9852/847/529/6599/5577/57727/5576/64710/5781/5573/8396/1398/3692/5471/6513/10890/5905/4141/2805/5567/2932/6431/8615/5860/523/526/988/682/301/27101/2806/2058/5245/8826/328/5928/2950/142/5591/7532/5315/4131	65
GO:0000054	BP	GO:0000054	ribosomal subunit export from nucleus	7/1773	14/18862	0.000121317	0.000994947	0.000736525	4927/6059/3692/6209/7514/4869/5901	7
GO:0006122	BP	GO:0006122	mitochondrial electron transport, ubiquinol to cytochrome c	7/1773	14/18862	0.000121317	0.000994947	0.000736525	54205/27089/1537/7381/7386/7384/7385	7
GO:0006999	BP	GO:0006999	nuclear pore organization	7/1773	14/18862	0.000121317	0.000994947	0.000736525	25909/23165/55746/81929/9688/7175/57142	7
GO:0033750	BP	GO:0033750	ribosome localization	7/1773	14/18862	0.000121317	0.000994947	0.000736525	4927/6059/3692/6209/7514/4869/5901	7
GO:0046040	BP	GO:0046040	IMP metabolic process	7/1773	14/18862	0.000121317	0.000994947	0.000736525	158/3251/5471/5198/471/2618/10606	7
GO:0072350	BP	GO:0072350	tricarboxylic acid metabolic process	7/1773	14/18862	0.000121317	0.000994947	0.000736525	48/1431/47/50/2746/3417/3418	7
GO:0098787	BP	GO:0098787	mRNA cleavage involved in mRNA processing	7/1773	14/18862	0.000121317	0.000994947	0.000736525	29894/79869/4686/81608/1478/11052/11051	7
GO:0030866	BP	GO:0030866	cortical actin cytoskeleton organization	12/1773	38/18862	0.000121511	0.000995056	0.000736606	1020/114793/382/2037/2035/3996/10787/10015/23136/7094/811/7430	12
GO:1905269	BP	GO:1905269	positive regulation of chromatin organization	22/1773	100/18862	0.000123391	0.00100894	0.000746885	408/11143/54623/22938/8473/4204/4089/23168/84656/80349/25942/23028/6598/1786/9733/1487/26097/7175/10856/7334/10155/3009	22
GO:0006898	BP	GO:0006898	receptor-mediated endocytosis	52/1773	328/18862	0.000125006	0.00102063	0.000755541	975/408/867/55681/60682/22848/6456/1175/26052/5868/3685/9892/6386/1212/950/7037/8301/2885/4035/10211/382/23011/6616/54874/3092/29978/164/1191/1211/1785/1173/28988/3688/3339/160/161/2017/10525/5879/163/10808/375/821/10487/302/7184/335/3320/811/7430/1213/3190	52
GO:0002576	BP	GO:0002576	platelet degranulation	26/1773	128/18862	0.000128482	0.00104746	0.000775398	51097/7873/374354/1191/3959/5660/6812/2244/29789/51571/2266/6647/87/350/8407/9948/7414/308/7094/81/2335/335/226/7114/2316/801	26
GO:0045732	BP	GO:0045732	positive regulation of protein catabolic process	39/1773	225/18862	0.000130739	0.00106357	0.000787324	975/51079/79888/2931/23192/4898/7917/23640/5716/4035/207/10134/29978/29979/1191/51160/1457/6923/2932/4905/6449/23327/5704/5702/5962/5700/9554/55737/5701/10075/1642/7879/4478/10399/7415/3320/7430/3303/3304	39
GO:1902600	BP	GO:1902600	proton transmembrane transport	30/1773	157/18862	0.000130844	0.00106357	0.000787324	51382/9114/528/1528/1345/51606/529/9377/4697/30968/1340/10632/4513/523/526/509/10476/522/23530/11331/1327/539/515/5250/488/81/11315/498/506/7114	30
GO:0061025	BP	GO:0061025	membrane fusion	32/1773	172/18862	0.000134136	0.00108871	0.000805939	9482/25801/10652/26052/9135/4218/112755/4976/310/2773/51479/6616/6857/8417/8396/1785/23673/10059/4905/6812/11151/8615/9554/301/8775/55968/3799/9218/10075/7879/302/811	32
GO:0032212	BP	GO:0032212	positive regulation of telomere maintenance via telomerase	11/1773	33/18862	0.000134667	0.00108981	0.000806751	1736/5594/22948/7520/10574/10575/6950/7203/10576/3178/10694	11
GO:0043928	BP	GO:0043928	exonucleolytic catabolism of deadenylated mRNA	11/1773	33/18862	0.000134667	0.00108981	0.000806751	80153/28960/10767/22894/11157/80349/23644/27258/25804/57819/1656	11
GO:0009127	BP	GO:0009127	purine nucleoside monophosphate biosynthetic process	9/1773	23/18862	0.000135191	0.00109245	0.000808704	158/3251/5471/8833/5198/471/2618/3615/10606	9
GO:0010761	BP	GO:0010761	fibroblast migration	13/1773	44/18862	0.000137079	0.00110284	0.000816397	28956/26060/55198/5058/8879/207/9124/3688/9219/5879/23603/55920/9590	13
GO:1901028	BP	GO:1901028	regulation of mitochondrial outer membrane permeabilization involved in apoptotic signaling pathway	13/1773	44/18862	0.000137079	0.00110284	0.000816397	4836/2931/581/10449/2932/292/7533/7529/7532/10971/3303/7531/7534	13
GO:1903573	BP	GO:1903573	negative regulation of response to endoplasmic reticulum stress	13/1773	44/18862	0.000137079	0.00110284	0.000816397	51060/5770/23376/4976/10959/1191/9097/51035/6449/10399/11315/3309/3303	13
GO:0033108	BP	GO:0033108	mitochondrial respiratory chain complex assembly	22/1773	101/18862	0.000143955	0.00115647	0.000856098	126328/4709/4728/51079/4704/4723/91942/4698/25813/4706/4712/4702/4705/4724/7019/55967/4729/4720/9131/4722/4719/7386	22
GO:0046365	BP	GO:0046365	monosaccharide catabolic process	16/1773	62/18862	0.000144516	0.0011576	0.000856933	26007/8604/2584/5214/283209/55276/11164/230/5236/5213/5211/5223/226/5230/7167/5315	16
GO:0051851	BP	GO:0051851	modulation by host of symbiont process	16/1773	62/18862	0.000144516	0.0011576	0.000856933	5091/22938/3065/64710/6598/10910/6597/5702/23435/5245/9218/5479/8091/302/1072/3312	16
GO:1901799	BP	GO:1901799	negative regulation of proteasomal protein catabolic process	14/1773	50/18862	0.000145235	0.00116167	0.000859942	6386/8473/4130/7917/6599/9491/8667/9097/51035/6449/7874/57805/6135/11315	14
GO:0019320	BP	GO:0019320	hexose catabolic process	15/1773	56/18862	0.000147232	0.00117593	0.000870503	26007/8604/2584/5214/283209/55276/230/5236/5213/5211/5223/226/5230/7167/5315	15
GO:0006140	BP	GO:0006140	regulation of nucleotide metabolic process	25/1773	122/18862	0.000148392	0.00118348	0.000876093	23279/5571/8604/23165/348995/23636/55746/81929/8473/79902/28964/4927/8021/9631/8480/23225/3692/6396/9688/4513/7175/142/5223/7415/7114	25
GO:0044843	BP	GO:0044843	cell cycle G1/S phase transition	48/1773	298/18862	0.000152138	0.0012116	0.000896904	1020/8450/586/4849/26060/5537/79577/54623/8882/10498/55198/23236/581/8065/5721/8453/8451/8454/10197/207/5356/1719/6241/2935/5720/5471/6119/8452/23019/1104/5962/2273/6194/1981/301/11331/6118/6117/328/4174/4176/3276/4175/5111/4172/4171/4678/5591	48
GO:0050770	BP	GO:0050770	regulation of axonogenesis	29/1773	151/18862	0.00015329	0.00121901	0.000902393	1020/57611/5362/5058/5604/23191/57698/2909/4035/11344/1630/9798/1982/3897/23654/28988/2932/22902/387/4137/5062/23499/396/57142/2335/1627/2664/4133/4131	29
GO:1901606	BP	GO:1901606	alpha-amino acid catabolic process	20/1773	88/18862	0.000154485	0.00122674	0.000908117	2752/642/1743/4967/5471/1738/2805/80150/5860/875/102724560/6472/38/23576/2806/3028/2746/501/191/23564	20
GO:0009064	BP	GO:0009064	glutamine family amino acid metabolic process	18/1773	75/18862	0.000156389	0.00124007	0.000917981	7915/8604/2752/5832/4204/56474/56954/5471/8833/2805/1503/80150/5198/23576/2806/2746/26227/23564	18
GO:0016601	BP	GO:0016601	Rac protein signal transduction	12/1773	39/18862	0.000160619	0.00126995	0.000940103	8473/23191/199731/382/10152/6993/1398/1785/28988/51495/10787/5879	12
GO:0033683	BP	GO:0033683	nucleotide-excision repair, DNA incision	12/1773	39/18862	0.000160619	0.00126995	0.000940103	8450/8451/5984/5982/5424/6119/6118/6117/1642/5111/142/6233	12
GO:0006903	BP	GO:0006903	vesicle targeting	21/1773	95/18862	0.00016232	0.00128156	0.000948695	5537/10652/60412/10016/10972/55291/23122/10959/23332/9632/81876/23256/8452/22872/6396/10484/4905/8615/10342/9554/8775	21
GO:0006144	BP	GO:0006144	purine nucleobase metabolic process	8/1773	19/18862	0.000175625	0.00138462	0.00102498	3251/23028/5471/8833/6472/2618/10606/7276	8
GO:0009156	BP	GO:0009156	ribonucleoside monophosphate biosynthetic process	11/1773	34/18862	0.000182279	0.00143297	0.00106078	51727/7372/158/3251/5471/8833/5198/471/2618/3615/10606	11
GO:0051085	BP	GO:0051085	chaperone cofactor-dependent protein refolding	11/1773	34/18862	0.000182279	0.00143297	0.00106078	7266/3337/10728/3336/10808/3313/6767/3309/3303/3304/3312	11
GO:0018205	BP	GO:0018205	peptidyl-lysine modification	59/1773	391/18862	0.000183027	0.0014349	0.00106221	408/11143/9329/23279/10269/8295/55677/10013/84681/22938/23165/80218/4706/348995/53615/23636/55746/81929/546/8473/6830/79902/80335/7917/4204/4089/4927/23168/84656/80349/53335/25942/8021/9631/8480/23028/23225/6598/1786/23170/5905/79969/9688/8520/1487/7329/86/10055/8607/7175/10054/10856/3066/9555/6418/11315/51504/10155/3009	59
GO:0019674	BP	GO:0019674	NAD metabolic process	14/1773	51/18862	0.000183046	0.0014349	0.00106221	133686/8604/5214/283209/230/2820/5213/5211/5223/226/3939/5230/7167/5315	14
GO:0000724	BP	GO:0000724	double-strand break repair via homologous recombination	27/1773	138/18862	0.000185416	0.00145141	0.00107443	25939/57599/5531/54386/23347/4361/5965/3980/151987/64710/23028/10213/6119/56893/10097/6118/6117/7158/7334/4174/4176/4175/4172/2521/4171/142/6421	27
GO:0006470	BP	GO:0006470	protein dephosphorylation	51/1773	325/18862	0.0001869	0.00146096	0.0010815	5786/5782/54205/5537/5770/5532/5524/84687/5531/25930/261726/134510/5610/51400/80895/5495/92609/5529/6305/8189/55291/55631/5300/151987/5792/5510/55197/4659/5781/26472/5500/5764/5536/52/2932/2029/29085/5496/2280/5515/5499/5803/6418/5725/7529/5518/7184/801/805/808/7531	51
GO:0010976	BP	GO:0010976	positive regulation of neuron projection development	29/1773	153/18862	0.000194317	0.00151678	0.00112282	57118/950/23191/4976/2909/4035/11344/5756/1272/8175/23028/6993/23654/5764/8724/221914/10059/28988/4192/160/10097/8826/4076/4830/11075/3309/1627/1809/2316	29
GO:0070997	BP	GO:0070997	neuron death	53/1773	342/18862	0.000194944	0.00151951	0.00112484	1020/408/867/1271/5921/1948/23385/8882/2931/4345/23098/57465/1718/581/56616/4204/8301/80331/4035/207/2539/1630/824/10550/5300/6648/8883/23321/1965/1191/10314/5536/9040/2932/4192/6812/11151/5700/1981/4436/55737/6647/4137/10570/163/5803/6418/10399/142/11315/3309/4841/10763	53
GO:0006631	BP	GO:0006631	fatty acid metabolic process	59/1773	392/18862	0.000196176	0.00152691	0.00113032	79966/5571/51/84532/10455/30/3033/5825/9415/1666/5096/4706/55198/5445/6342/8879/2876/5095/2879/207/2944/22949/5577/51144/11313/9524/9373/224/2109/3032/3692/9444/11160/4048/1891/1632/3295/1738/4282/873/10449/1892/2108/10434/51495/10728/301/38/39/2946/3028/47/3030/11332/128/2950/2171/2194/335	59
GO:0034440	BP	GO:0034440	lipid oxidation	23/1773	110/18862	0.000196447	0.00152691	0.00113032	51/10455/30/3033/5825/1666/55198/6342/207/224/2109/3032/1891/1632/3295/10449/1892/2108/38/39/3028/3030/128	23
GO:0006109	BP	GO:0006109	regulation of carbohydrate metabolic process	36/1773	206/18862	0.000197116	0.00152882	0.00113174	57486/23279/10269/5571/10580/2931/8604/23165/348995/23636/55746/81929/8473/950/79902/28964/4927/207/9852/8021/9631/8480/23225/3692/5500/6396/9688/2932/7874/160/5499/7175/1642/5223/1213/3146	36
GO:0010592	BP	GO:0010592	positive regulation of lamellipodium assembly	10/1773	29/18862	0.000197317	0.00152882	0.00113174	23191/11344/10152/1785/10109/10787/10097/5879/10096/6624	10
GO:0043112	BP	GO:0043112	receptor metabolic process	31/1773	168/18862	0.000197527	0.00152882	0.00113174	1020/975/408/55681/51100/1175/5770/26052/5868/6386/823/7037/8301/2885/4035/10211/6616/29978/51510/1211/1785/1173/4905/3688/160/161/163/375/302/7430/1213	31
GO:0008334	BP	GO:0008334	histone mRNA metabolic process	9/1773	24/18862	0.000198338	0.00153294	0.00113479	5394/6635/51692/4686/6637/6636/5976/6634/6741	9
GO:0006901	BP	GO:0006901	vesicle coating	17/1773	70/18862	0.00020247	0.00156268	0.0011568	5537/10016/10972/55291/10959/9632/81876/23256/8452/22872/6396/10484/4905/8615/10342/9554/8775	17
GO:0034975	BP	GO:0034975	protein folding in endoplasmic reticulum	6/1773	11/18862	0.000208399	0.00159752	0.00118259	821/5034/2923/7184/811/3309	6
GO:0060315	BP	GO:0060315	negative regulation of ryanodine-sensitive calcium-release channel activity	6/1773	11/18862	0.000208399	0.00159752	0.00118259	9446/6717/2946/801/805/808	6
GO:0070142	BP	GO:0070142	synaptic vesicle budding	6/1773	11/18862	0.000208399	0.00159752	0.00118259	26052/9892/8943/8301/1785/375	6
GO:0072697	BP	GO:0072697	protein localization to cell cortex	6/1773	11/18862	0.000208399	0.00159752	0.00118259	4682/84687/2037/2035/4926/7430	6
GO:0071428	BP	GO:0071428	rRNA-containing ribonucleoprotein complex export from nucleus	7/1773	15/18862	0.000209015	0.00159752	0.00118259	4927/6059/3692/6209/7514/4869/5901	7
GO:0090148	BP	GO:0090148	membrane fission	7/1773	15/18862	0.000209015	0.00159752	0.00118259	51100/6456/26052/4976/1785/10059/23603	7
GO:1905906	BP	GO:1905906	regulation of amyloid fibril formation	7/1773	15/18862	0.000209015	0.00159752	0.00118259	5203/10471/1191/7411/5201/5202/5204	7
GO:0009167	BP	GO:0009167	purine ribonucleoside monophosphate metabolic process	12/1773	40/18862	0.000209994	0.00160055	0.00118483	158/3251/204/8573/5471/8833/5198/203/471/2618/3615/10606	12
GO:0030521	BP	GO:0030521	androgen receptor signaling pathway	12/1773	40/18862	0.000209994	0.00160055	0.00118483	10013/7337/9667/3065/3301/8289/6597/6422/5245/1655/11315/10521	12
GO:0032868	BP	GO:0032868	response to insulin	45/1773	278/18862	0.000214902	0.00163569	0.00121085	5786/51382/26060/5770/9114/10580/528/2931/4218/6430/55198/51606/8473/5058/8836/23191/4976/2885/207/9852/847/529/6599/57727/64710/5781/8396/3692/5471/6513/10890/4141/2805/2932/6431/8615/523/526/2806/2058/2950/142/5591/7532/5315	45
GO:0048638	BP	GO:0048638	regulation of developmental growth	50/1773	319/18862	0.000221221	0.00168146	0.00124473	1020/10269/57611/2931/23236/5058/8879/23191/57698/4897/4035/375790/207/9043/2539/11344/53335/1630/25942/10939/9798/23011/1982/5300/6857/3897/9373/79068/1785/28988/2932/23327/2017/5594/22902/6647/4137/23499/5479/7919/57142/2335/7430/1627/2664/5591/4133/1808/10409/4131	50
GO:0010823	BP	GO:0010823	negative regulation of mitochondrion organization	13/1773	46/18862	0.000224845	0.00170196	0.0012599	2876/7037/4976/5716/207/1191/10059/10449/10493/4137/10075/292/3303	13
GO:0030261	BP	GO:0030261	chromosome condensation	13/1773	46/18862	0.000224845	0.00170196	0.0012599	64151/9131/9918/7153/3024/22985/10592/10051/3005/8815/8091/8971/3009	13
GO:0051489	BP	GO:0051489	regulation of filopodium assembly	13/1773	46/18862	0.000224845	0.00170196	0.0012599	26052/5868/9513/375790/8087/382/54874/5898/2823/832/2596/6624/1809	13
GO:1903749	BP	GO:1903749	positive regulation of establishment of protein localization to mitochondrion	15/1773	58/18862	0.000225189	0.00170222	0.0012601	51100/4836/2931/1459/7332/9141/10055/10075/9520/7533/7529/7532/10971/7531/7534	15
GO:0006998	BP	GO:0006998	nuclear envelope organization	14/1773	52/18862	0.000229047	0.00172664	0.00127817	10269/25777/221496/79188/7443/9631/2010/9688/23435/5515/55968/8815/1639/5518	14
GO:0032210	BP	GO:0032210	regulation of telomere maintenance via telomerase	14/1773	52/18862	0.000229047	0.00172664	0.00127817	5394/55226/1736/5594/22948/7520/10574/10575/6950/7203/10576/3178/10694/3192	14
GO:0099504	BP	GO:0099504	synaptic vesicle cycle	32/1773	177/18862	0.000231742	0.00174456	0.00129144	1020/23413/6456/22930/56850/26052/5532/5868/9892/63908/8943/28964/23191/112755/8301/80331/382/6616/6857/9373/8618/1785/10059/6455/2932/6812/1488/8775/488/821/801/808	32
GO:0000725	BP	GO:0000725	recombinational repair	27/1773	140/18862	0.000237132	0.0017827	0.00131968	25939/57599/5531/54386/23347/4361/5965/3980/151987/64710/23028/10213/6119/56893/10097/6118/6117/7158/7334/4174/4176/4175/4172/2521/4171/142/6421	27
GO:0000291	BP	GO:0000291	nuclear-transcribed mRNA catabolic process, exonucleolytic	11/1773	35/18862	0.000243417	0.00182746	0.0013528	80153/28960/10767/22894/11157/80349/23644/27258/25804/57819/1656	11
GO:0007059	BP	GO:0007059	chromosome segregation	52/1773	337/18862	0.000248248	0.00186118	0.00137777	283489/80218/348995/23636/9183/81929/546/7283/8260/7917/1459/4361/27436/64151/23244/9698/51143/9918/7150/51510/7153/23126/1457/23047/8452/7756/10592/1104/7329/10051/11331/10097/8243/7175/10726/55920/8815/10096/9184/9126/292/10540/9555/7155/3837/5518/6188/6421/4926/5901/1778/3192	52
GO:0044272	BP	GO:0044272	sulfur compound biosynthetic process	34/1773	193/18862	0.000250303	0.00187404	0.00138729	79966/84532/9061/9446/2941/58478/3029/6576/4357/2944/4507/51144/9524/79017/2937/1737/2947/1738/5160/5162/27430/875/102724560/7358/2098/38/2946/47/1462/55748/10327/2950/4522/2194	34
GO:0006637	BP	GO:0006637	acyl-CoA metabolic process	22/1773	105/18862	0.000259749	0.00193948	0.00143573	79966/84532/4597/23597/8801/6576/51144/9524/1743/1737/10654/4967/3295/1738/5160/8803/5162/38/47/11332/1622/2194	22
GO:0035383	BP	GO:0035383	thioester metabolic process	22/1773	105/18862	0.000259749	0.00193948	0.00143573	79966/84532/4597/23597/8801/6576/51144/9524/1743/1737/10654/4967/3295/1738/5160/8803/5162/38/47/11332/1622/2194	22
GO:0051650	BP	GO:0051650	establishment of vesicle localization	36/1773	209/18862	0.000263854	0.00196747	0.00145645	1020/5537/10652/26052/60412/10016/9892/10972/8943/8301/55291/23122/10959/54874/23332/9632/1785/81876/4646/23256/8452/22872/6396/10484/4905/8615/10342/9554/8775/3799/375/10540/5048/81/4133/1778	36
GO:0010591	BP	GO:0010591	regulation of lamellipodium assembly	12/1773	41/18862	0.000271726	0.00202342	0.00149787	23191/11344/5756/10152/1785/10109/10787/10097/5879/10096/832/6624	12
GO:0000910	BP	GO:0000910	cytokinesis	31/1773	171/18862	0.000273812	0.002034	0.0015057	25909/388/51100/5921/79187/5586/23636/28964/11258/9798/5300/51510/6651/23157/8452/55964/10015/10097/201161/403/387/10096/10801/375/4735/989/55752/6711/801/805/808	31
GO:0010970	BP	GO:0010970	transport along microtubule	29/1773	156/18862	0.000274256	0.002034	0.0015057	25777/55860/51668/4130/55201/8943/4976/23011/26958/22820/140735/83658/3842/1781/10128/6647/3799/8655/403/4137/5048/23224/3315/6421/4133/1778/3192/4131/3312	29
GO:0046165	BP	GO:0046165	alcohol biosynthetic process	29/1773	156/18862	0.000274256	0.002034	0.0015057	55750/4597/1717/50814/1718/1595/1719/2539/4047/3930/10654/11160/2222/2805/10449/1727/3422/5860/2224/39/6647/47/51477/231/3837/11315/2194/335/5901	29
GO:0072593	BP	GO:0072593	reactive oxygen species metabolic process	45/1773	281/18862	0.000274765	0.00203504	0.00150647	51/51079/285590/10013/4724/2876/2885/207/1719/2539/847/80777/2773/6648/1191/4722/3692/1785/183/378/1727/10131/4513/4719/23530/5879/6647/23576/10935/8655/10549/4137/25824/7416/9588/2950/8570/11315/23564/7001/3320/3050/3046/5052/3047	45
GO:0006893	BP	GO:0006893	Golgi to plasma membrane transport	15/1773	59/18862	0.000276033	0.0020362	0.00150733	149371/23233/55770/10640/9135/60412/1785/10890/3996/4905/10434/403/23499/10399/6711	15
GO:0018208	BP	GO:0018208	peptidyl-proline modification	15/1773	59/18862	0.000276033	0.0020362	0.00150733	23770/5524/23398/53938/9049/5303/2286/5300/51645/2287/2280/10549/2288/5479/5034	15
GO:1902373	BP	GO:1902373	negative regulation of mRNA catabolic process	15/1773	59/18862	0.000276033	0.0020362	0.00150733	10605/23367/1153/8241/8148/9967/23435/1996/1994/10949/10492/2521/3184/1660/3192	15
GO:0099003	BP	GO:0099003	vesicle-mediated transport in synapse	34/1773	194/18862	0.000276627	0.00203786	0.00150856	1020/23413/6456/22930/56850/26052/5532/5868/9892/4218/63908/8943/28964/23191/112755/8301/80331/382/6616/6857/9373/8618/1785/10059/6455/2932/6812/1488/8775/163/488/821/801/808	34
GO:0006352	BP	GO:0006352	DNA-templated transcription, initiation	41/1773	249/18862	0.000278489	0.00204883	0.00151668	2975/9329/5434/5432/22938/581/5430/7019/4204/2962/5437/51773/6598/5431/6597/7343/8148/5704/5702/9774/5706/5705/8467/5701/10923/10155/3146/8294/8359/8360/8361/8362/8363/8364/8365/8366/8367/8368/8370/121504/554313	41
GO:0090169	BP	GO:0090169	regulation of spindle assembly	9/1773	25/18862	0.000284189	0.00208519	0.0015436	4733/51510/1104/7175/4926/3303/3304/1778/3192	9
GO:1990000	BP	GO:1990000	amyloid fibril formation	9/1773	25/18862	0.000284189	0.00208519	0.0015436	5203/10471/1191/7411/5201/5202/5204/2280/4137	9
GO:1902743	BP	GO:1902743	regulation of lamellipodium organization	14/1773	53/18862	0.000284646	0.00208576	0.00154402	57175/23191/11344/5756/10152/1785/10109/10787/10097/5879/23603/10096/832/6624	14
GO:0030968	BP	GO:0030968	endoplasmic reticulum unfolded protein response	25/1773	127/18862	0.000286119	0.00209377	0.00154995	55738/5770/9114/23376/2931/51726/581/439/10987/10959/1965/9217/22872/10525/118/3068/1639/7094/821/10130/10399/7415/7184/811/3309	25
GO:0000070	BP	GO:0000070	mitotic sister chromatid segregation	30/1773	164/18862	0.000290272	0.00212009	0.00156943	283489/80218/23636/9183/81929/546/7283/8260/27436/64151/23244/51143/9918/51510/23126/23047/8452/7756/10592/10051/8243/7175/10726/9184/10540/9555/3837/4926/5901/3192	30
GO:0030032	BP	GO:0030032	lamellipodium assembly	17/1773	72/18862	0.000290872	0.00212009	0.00156943	7410/79902/23191/11344/5756/55704/10152/1785/3688/10109/10787/10097/5879/10096/832/7414/6624	17
GO:1903747	BP	GO:1903747	regulation of establishment of protein localization to mitochondrion	17/1773	72/18862	0.000290872	0.00212009	0.00156943	51100/4836/2931/1459/7332/3301/9141/10055/4137/10075/9520/7533/7529/7532/10971/7531/7534	17
GO:0051702	BP	GO:0051702	biological process involved in interaction with symbiont	20/1773	92/18862	0.000291472	0.00212166	0.00157059	5091/22938/3065/2876/64710/6598/10910/6597/5702/23435/5245/9218/1642/5479/8091/302/2335/3329/1072/3312	20
GO:0032869	BP	GO:0032869	cellular response to insulin stimulus	38/1773	226/18862	0.000298792	0.00216897	0.00160562	5786/51382/26060/5770/9114/10580/528/2931/4218/6430/55198/51606/8473/5058/23191/4976/2885/207/529/6599/57727/64710/5781/8396/5471/10890/4141/2805/2932/8615/523/526/2058/2950/142/5591/7532/5315	38
GO:0009063	BP	GO:0009063	cellular amino acid catabolic process	22/1773	106/18862	0.000299155	0.00216897	0.00160562	26275/7915/18/2752/4329/642/1743/4967/5471/1738/2805/80150/5860/875/102724560/6472/23576/2806/2746/501/191/23564	22
GO:0048259	BP	GO:0048259	regulation of receptor-mediated endocytosis	22/1773	106/18862	0.000299155	0.00216897	0.00160562	408/867/55681/60682/22848/6456/3685/9892/6386/8301/10211/382/23011/3092/29978/1191/1785/160/5879/375/302/3190	22
GO:0050767	BP	GO:0050767	regulation of neurogenesis	53/1773	348/18862	0.000302027	0.00218692	0.0016189	1020/58497/57611/23376/22938/55198/3065/5362/5058/5604/23191/4976/57698/4035/6009/11344/1630/51441/9798/23011/1982/3897/23028/10419/6993/23654/5764/10059/28988/4192/22902/10097/387/4137/51593/3066/4076/5803/23499/27339/7520/396/4673/1495/7533/3418/57142/3148/2335/1627/2664/4133/4131	53
GO:0016197	BP	GO:0016197	endosomal transport	40/1773	242/18862	0.000302921	0.0021905	0.00162155	23325/89853/56850/10652/112936/8027/25930/4218/29934/8943/81609/63893/7251/6643/8301/9559/9043/382/392/51479/51699/23085/9146/51510/58513/51160/10890/8724/10059/9201/51534/7874/51552/55737/23603/7879/1639/7415/1213/6233	40
GO:0042326	BP	GO:0042326	negative regulation of phosphorylation	60/1773	407/18862	0.000305302	0.00220258	0.0016305	408/867/6456/5770/23770/64780/581/23636/54386/28964/199731/7251/2873/207/9043/7453/26973/10959/5577/5576/5573/5859/8396/103/3301/27250/183/2764/5536/51637/2192/23530/23435/1981/1399/5515/10527/10935/11171/8655/6422/23603/4137/5062/9555/3843/2950/3315/10399/7529/5518/11315/5591/4869/7532/7345/3192/801/805/808	60
GO:0030705	BP	GO:0030705	cytoskeleton-dependent intracellular transport	34/1773	195/18862	0.000305391	0.00220258	0.0016305	25777/55860/51668/4130/55201/8943/4976/23011/54874/26958/22820/55704/4646/140735/83658/3842/1781/10128/6647/3799/8655/403/4137/5048/23224/3315/81/6421/4133/1778/3192/203068/4131/3312	34
GO:0006261	BP	GO:0006261	DNA-dependent DNA replication	29/1773	157/18862	0.000306747	0.00220946	0.00163559	11143/25939/10269/3978/57418/8882/9188/546/5984/4361/5965/5982/5424/3980/64710/9416/30968/5976/6119/6742/6118/10189/6117/4174/4176/4175/5111/4172/4171	29
GO:0006007	BP	GO:0006007	glucose catabolic process	11/1773	36/18862	0.000321	0.00230609	0.00170712	8604/5214/283209/230/5213/5211/5223/226/5230/7167/5315	11
GO:0033572	BP	GO:0033572	transferrin transport	11/1773	36/18862	0.000321	0.00230609	0.00170712	51382/9114/528/51606/7037/529/392/1785/523/526/1213	11
GO:0031058	BP	GO:0031058	positive regulation of histone modification	19/1773	86/18862	0.000329191	0.00235877	0.00174612	408/11143/54623/22938/8473/4204/4089/23168/84656/80349/23028/6598/1786/9733/1487/26097/10856/7334/3009	19
GO:2000779	BP	GO:2000779	regulation of double-strand break repair	19/1773	86/18862	0.000329191	0.00235877	0.00174612	131870/57599/84309/9320/5531/54386/23347/151987/23028/56893/10097/6118/7913/55611/7158/8091/2521/142/5591	19
GO:1904375	BP	GO:1904375	regulation of protein localization to cell periphery	24/1773	121/18862	0.000333427	0.00238602	0.00176629	1020/9482/26060/56850/10580/84687/10082/8301/4035/207/382/8417/2037/2035/1173/3688/10434/3799/2239/10399/6711/4926/7430/1213	24
GO:0051225	BP	GO:0051225	spindle assembly	23/1773	114/18862	0.00034008	0.00243047	0.0017992	22924/10982/23122/4733/23332/51510/7756/1104/347688/8243/7175/387/9126/22919/3837/6188/4926/3303/3304/1778/3192/2316/203068	23
GO:0006098	BP	GO:0006098	pentose-phosphate shunt	7/1773	16/18862	0.000341483	0.00243102	0.0017996	2539/55276/25796/6888/5226/7086/5223	7
GO:0006206	BP	GO:0006206	pyrimidine nucleobase metabolic process	7/1773	16/18862	0.000341483	0.00243102	0.0017996	51727/7372/56474/4329/1503/5594/6240	7
GO:0016584	BP	GO:0016584	nucleosome positioning	7/1773	16/18862	0.000341483	0.00243102	0.0017996	54623/51773/3024/8467/3005/8971/3009	7
GO:2000278	BP	GO:2000278	regulation of DNA biosynthetic process	22/1773	107/18862	0.00034371	0.00244372	0.001809	5394/55226/1736/5984/5982/5594/10728/7919/22948/7520/5111/10574/10575/6950/7203/3184/10576/3178/3320/10694/3192/3181	22
GO:0046782	BP	GO:0046782	regulation of viral transcription	12/1773	42/18862	0.000348199	0.00246925	0.0018279	7469/5434/25920/5432/51497/5430/2962/5437/51773/6829/5431/1660	12
GO:0071364	BP	GO:0071364	cellular response to epidermal growth factor stimulus	12/1773	42/18862	0.000348199	0.00246925	0.0018279	867/5782/8882/84687/207/5781/4141/5335/8826/4176/2950/1915	12
GO:0045862	BP	GO:0045862	positive regulation of proteolysis	55/1773	367/18862	0.000353975	0.00250698	0.00185583	408/23385/51079/54205/444/57599/10016/11047/51024/2931/581/5721/4898/8473/56616/7917/23640/5716/8301/10197/207/10134/9798/10550/3092/9131/29978/29979/5720/10213/1191/10541/6923/9733/2932/26999/2192/6449/5704/5702/9141/5700/1509/3336/4137/5701/3066/10399/6188/2335/7415/3329/3303/3304/3146	55
GO:0045540	BP	GO:0045540	regulation of cholesterol biosynthetic process	13/1773	48/18862	0.000356771	0.00252029	0.00186569	4597/1717/1595/4047/10654/11160/2222/3422/2224/6647/3837/2194/5901	13
GO:0106118	BP	GO:0106118	regulation of sterol biosynthetic process	13/1773	48/18862	0.000356771	0.00252029	0.00186569	4597/1717/1595/4047/10654/11160/2222/3422/2224/6647/3837/2194/5901	13
GO:0033866	BP	GO:0033866	nucleoside bisphosphate biosynthetic process	16/1773	67/18862	0.000378668	0.00266472	0.0019726	79966/79877/84532/9061/55229/6576/51144/9524/1737/1738/5160/5162/38/47/11332/2194	16
GO:0034030	BP	GO:0034030	ribonucleoside bisphosphate biosynthetic process	16/1773	67/18862	0.000378668	0.00266472	0.0019726	79966/79877/84532/9061/55229/6576/51144/9524/1737/1738/5160/5162/38/47/11332/2194	16
GO:0034033	BP	GO:0034033	purine nucleoside bisphosphate biosynthetic process	16/1773	67/18862	0.000378668	0.00266472	0.0019726	79966/79877/84532/9061/55229/6576/51144/9524/1737/1738/5160/5162/38/47/11332/2194	16
GO:0006563	BP	GO:0006563	L-serine metabolic process	6/1773	12/18862	0.000383626	0.00268929	0.00199079	63826/875/102724560/6472/29968/26227	6
GO:0042178	BP	GO:0042178	xenobiotic catabolic process	6/1773	12/18862	0.000383626	0.00268929	0.00199079	30/9446/1429/2944/2947/2946	6
GO:0043471	BP	GO:0043471	regulation of cellular carbohydrate catabolic process	6/1773	12/18862	0.000383626	0.00268929	0.00199079	2931/950/5500/5499/5223/3146	6
GO:0045927	BP	GO:0045927	positive regulation of growth	41/1773	253/18862	0.000391093	0.00273815	0.00202696	57611/8882/6386/23236/5058/23191/57698/5716/4035/375790/207/4686/11344/9798/1982/5300/6857/3897/9373/84717/1457/55031/28988/23327/136319/5594/1981/22902/6422/4137/23499/5479/7919/2335/7430/1627/2664/5591/3009/10409/4131	41
GO:1901214	BP	GO:1901214	regulation of neuron death	47/1773	302/18862	0.000395777	0.00276742	0.00204863	1020/408/867/1271/5921/1948/8882/2931/4345/23098/1718/581/4204/8301/80331/4035/207/2539/1630/824/5300/6648/8883/23321/1965/1191/10314/5536/9040/2932/4192/6812/11151/5700/1981/4436/55737/6647/4137/163/5803/6418/10399/142/11315/4841/10763	47
GO:0006123	BP	GO:0006123	mitochondrial electron transport, cytochrome c to oxygen	8/1773	21/18862	0.000398396	0.00277867	0.00205696	54205/1345/9377/4697/1340/4513/1329/1327	8
GO:0019646	BP	GO:0019646	aerobic electron transport chain	8/1773	21/18862	0.000398396	0.00277867	0.00205696	54205/1345/9377/4697/1340/4513/1329/1327	8
GO:0048199	BP	GO:0048199	vesicle targeting, to, from or within Golgi	17/1773	74/18862	0.000410941	0.00286254	0.00211904	5537/10016/10972/55291/10959/9632/81876/23256/8452/22872/6396/10484/4905/8615/10342/9554/8775	17
GO:0052126	BP	GO:0052126	movement in host environment	31/1773	175/18862	0.000415798	0.00289271	0.00214138	975/867/23265/1948/5091/55770/3685/950/7251/7037/2885/9798/3839/6993/1525/8724/3673/3688/682/1500/5245/9218/1642/7879/5034/3956/3921/4684/3303/3304/10155	31
GO:0035821	BP	GO:0035821	modulation of process of other organism	24/1773	123/18862	0.000429372	0.00298337	0.00220849	5091/22938/3065/5610/3839/64710/3836/9217/6598/3840/10910/3838/6597/5702/23435/11331/5245/9218/5479/8091/302/3837/1072/3312	24
GO:0097345	BP	GO:0097345	mitochondrial outer membrane permeabilization	14/1773	55/18862	0.000431154	0.00299198	0.00221486	4836/2931/581/10449/2932/292/7417/7533/7529/7532/10971/3303/7531/7534	14
GO:0009069	BP	GO:0009069	serine family amino acid metabolic process	12/1773	43/18862	0.000442113	0.00305647	0.0022626	4357/1719/22929/63826/875/102724560/6472/2618/6301/29968/4522/26227	12
GO:0009124	BP	GO:0009124	nucleoside monophosphate biosynthetic process	12/1773	43/18862	0.000442113	0.00305647	0.0022626	51727/7372/158/3251/5471/8833/5198/471/2618/1854/3615/10606	12
GO:0009126	BP	GO:0009126	purine nucleoside monophosphate metabolic process	12/1773	43/18862	0.000442113	0.00305647	0.0022626	158/3251/204/8573/5471/8833/5198/203/471/2618/3615/10606	12
GO:0001933	BP	GO:0001933	negative regulation of protein phosphorylation	54/1773	362/18862	0.00044668	0.00308416	0.0022831	408/867/6456/5770/23770/64780/581/23636/54386/199731/7251/2873/207/9043/7453/26973/10959/5577/5576/5573/5859/103/3301/27250/183/2764/5536/51637/2192/23530/23435/1981/1399/5515/10527/11171/6422/23603/5062/9555/3843/2950/3315/10399/7529/5518/11315/5591/4869/7532/7345/801/805/808	54
GO:0006094	BP	GO:0006094	gluconeogenesis	19/1773	88/18862	0.000448006	0.00308944	0.00228701	57486/5091/8604/8473/10165/6576/8402/2805/230/7874/2806/5236/1642/4190/4191/5223/226/5230/7167	19
GO:1903201	BP	GO:1903201	regulation of oxidative stress-induced cell death	16/1773	68/18862	0.000452584	0.00311711	0.00230749	10013/2876/207/6648/29979/10314/10131/6647/7295/5034/3315/10399/142/6421/11315/4841	16
GO:0051962	BP	GO:0051962	positive regulation of nervous system development	42/1773	263/18862	0.00045771	0.00314847	0.00233071	57611/23376/22938/3065/5362/5058/5604/23191/4976/57698/4035/375790/6009/11344/9798/23011/1982/3897/23028/10419/23654/5764/10059/28988/4192/22902/10097/387/4137/51593/3066/4076/5803/23499/27339/7520/396/4673/2335/1627/2664/4131	42
GO:0051348	BP	GO:0051348	negative regulation of transferase activity	46/1773	296/18862	0.000468392	0.00321793	0.00238212	867/5770/2931/23636/7251/2873/207/7453/26973/5577/5576/5573/5859/8396/103/3301/27250/183/2764/2932/51637/1974/29085/5515/10527/10935/6201/6422/23603/4137/6135/5062/9349/9555/6125/3843/2950/3315/10399/7529/5518/11315/4869/7532/7345/3192	46
GO:0046902	BP	GO:0046902	regulation of mitochondrial membrane permeability	17/1773	75/18862	0.000485552	0.00332945	0.00246468	23593/4836/2931/581/6993/1267/10449/2932/292/7417/7533/7529/7532/10971/3303/7531/7534	17
GO:0051053	BP	GO:0051053	negative regulation of DNA metabolic process	24/1773	124/18862	0.000485835	0.00332945	0.00246468	84309/9320/1676/5394/55226/54386/23347/3024/56893/4436/2956/3005/55611/7158/10923/7520/8091/8971/142/6188/3178/10155/3009/3192	24
GO:0010165	BP	GO:0010165	response to X-ray	10/1773	32/18862	0.000489077	0.00334334	0.00247496	64710/1785/3735/301/4436/6422/7158/7520/8091/2547	10
GO:0046825	BP	GO:0046825	regulation of protein export from nucleus	10/1773	32/18862	0.000489077	0.00334334	0.00247496	1020/5781/10541/2010/5905/2932/7175/7295/11315/7531	10
GO:0090305	BP	GO:0090305	nucleic acid phosphodiester bond hydrolysis	47/1773	305/18862	0.00049514	0.00338059	0.00250254	80153/131870/25939/8450/28960/22894/84309/1676/5394/55651/29894/79869/581/23646/8451/5984/51692/4361/4686/5982/7257/5424/22803/81608/3836/1478/23644/10146/6119/23019/11052/7247/11051/6118/6227/27044/3005/6117/328/1642/1653/5111/3837/142/3148/3146/6233	47
GO:0036473	BP	GO:0036473	cell death in response to oxidative stress	19/1773	89/18862	0.000520232	0.00354751	0.0026261	10013/57465/56616/2876/207/10550/6648/29979/10314/10131/6647/7295/5034/3315/10399/142/6421/11315/4841	19
GO:0009161	BP	GO:0009161	ribonucleoside monophosphate metabolic process	14/1773	56/18862	0.000525794	0.00357956	0.00264983	51727/7372/158/3251/204/8573/5471/8833/5198/203/471/2618/3615/10606	14
GO:0010977	BP	GO:0010977	negative regulation of neuron projection development	25/1773	132/18862	0.000526234	0.00357956	0.00264983	1020/1948/26052/10498/2931/7337/112755/4035/53335/1630/382/22902/387/3066/2288/11075/396/3956/57142/2664/4133/1809/2316/1400/7431	25
GO:0016246	BP	GO:0016246	RNA interference	7/1773	17/18862	0.00053357	0.00362051	0.00268014	57510/7257/10658/103/8575/7247/1660	7
GO:0071763	BP	GO:0071763	nuclear membrane organization	7/1773	17/18862	0.00053357	0.00362051	0.00268014	79188/7443/2010/23435/5515/8815/5518	7
GO:0006084	BP	GO:0006084	acetyl-CoA metabolic process	11/1773	38/18862	0.00053931	0.00365495	0.00270564	84532/4597/1743/1737/10654/1738/5160/5162/38/47/2194	11
GO:0048639	BP	GO:0048639	positive regulation of developmental growth	30/1773	170/18862	0.000545347	0.00369132	0.00273256	57611/23236/5058/23191/57698/4035/375790/207/11344/9798/1982/5300/6857/3897/9373/28988/23327/5594/22902/4137/23499/5479/7919/2335/7430/1627/2664/5591/10409/4131	30
GO:0009066	BP	GO:0009066	aspartate family amino acid metabolic process	13/1773	50/18862	0.000549384	0.00371408	0.00274941	60496/58478/4507/1743/56954/4967/1738/2805/80150/2806/501/4522/26227	13
GO:0033865	BP	GO:0033865	nucleoside bisphosphate metabolic process	26/1773	140/18862	0.000562542	0.00378907	0.00280492	79966/79877/84532/9061/4597/23597/55229/10380/8801/6576/51144/9524/1743/1737/10654/4967/3295/1738/5160/8803/5162/38/47/11332/1622/2194	26
GO:0033875	BP	GO:0033875	ribonucleoside bisphosphate metabolic process	26/1773	140/18862	0.000562542	0.00378907	0.00280492	79966/79877/84532/9061/4597/23597/55229/10380/8801/6576/51144/9524/1743/1737/10654/4967/3295/1738/5160/8803/5162/38/47/11332/1622/2194	26
GO:0034032	BP	GO:0034032	purine nucleoside bisphosphate metabolic process	26/1773	140/18862	0.000562542	0.00378907	0.00280492	79966/79877/84532/9061/4597/23597/55229/10380/8801/6576/51144/9524/1743/1737/10654/4967/3295/1738/5160/8803/5162/38/47/11332/1622/2194	26
GO:0006379	BP	GO:0006379	mRNA cleavage	8/1773	22/18862	0.000574763	0.00385722	0.00285537	29894/79869/51692/4686/81608/1478/11052/11051	8
GO:1901685	BP	GO:1901685	glutathione derivative metabolic process	8/1773	22/18862	0.000574763	0.00385722	0.00285537	9446/2941/2944/2947/2098/2946/10327/2950	8
GO:1901687	BP	GO:1901687	glutathione derivative biosynthetic process	8/1773	22/18862	0.000574763	0.00385722	0.00285537	9446/2941/2944/2947/2098/2946/10327/2950	8
GO:0046847	BP	GO:0046847	filopodium assembly	15/1773	63/18862	0.000590402	0.00395735	0.00292949	26052/5868/84687/9513/375790/8087/382/54874/5898/2823/832/2596/7430/6624/1809	15
GO:0072659	BP	GO:0072659	protein localization to plasma membrane	43/1773	275/18862	0.000618854	0.00414301	0.00306693	1020/975/9482/26060/56850/8642/10580/84687/2319/23114/4218/8301/4035/207/10211/23122/382/481/10550/10959/8417/55704/483/10890/1173/10484/4905/6812/3688/10434/5962/682/55737/23136/4301/3799/7879/23499/10399/6711/7430/1213/2316	43
GO:0000280	BP	GO:0000280	nuclear division	62/1773	436/18862	0.000641058	0.00428493	0.00317199	84687/283489/80218/23236/23636/9183/81929/546/7283/8260/7917/4361/27436/23122/7443/4733/64151/23244/5300/23332/51143/9918/5573/51510/7153/10419/23126/23047/2010/8452/7756/10592/1104/10051/347688/6152/5719/5515/11331/10097/55968/8243/7175/10726/387/8815/10096/9184/9126/10540/5902/9555/7155/3837/5518/4926/811/5901/3303/3304/3192/2316	62
GO:0006370	BP	GO:0006370	7-methylguanosine mRNA capping	10/1773	33/18862	0.000643168	0.00428493	0.00317199	5434/5432/23070/8731/5430/2962/5437/4686/6829/5431	10
GO:0040001	BP	GO:0040001	establishment of mitotic spindle localization	10/1773	33/18862	0.000643168	0.00428493	0.00317199	9183/23122/23332/6993/3688/55968/5048/1639/3837/4926	10
GO:0061157	BP	GO:0061157	mRNA destabilization	10/1773	33/18862	0.000643168	0.00428493	0.00317199	26058/51441/9698/10658/79068/5976/23435/8570/3184/10236	10
GO:0031115	BP	GO:0031115	negative regulation of microtubule polymerization	6/1773	13/18862	0.000655858	0.00433796	0.00321125	6904/10382/2288/11075/22919/4133	6
GO:0043248	BP	GO:0043248	proteasome assembly	6/1773	13/18862	0.000655858	0.00433796	0.00321125	11047/5711/5716/5710/5719/5717	6
GO:0046831	BP	GO:0046831	regulation of RNA export from nucleus	6/1773	13/18862	0.000655858	0.00433796	0.00321125	54888/55677/6830/11052/7175/1660	6
GO:0051280	BP	GO:0051280	negative regulation of release of sequestered calcium ion into cytosol	6/1773	13/18862	0.000655858	0.00433796	0.00321125	9446/6717/2946/801/805/808	6
GO:0106074	BP	GO:0106074	aminoacyl-tRNA metabolism involved in translational fidelity	6/1773	13/18862	0.000655858	0.00433796	0.00321125	80755/92675/3376/51520/7407/16	6
GO:1903651	BP	GO:1903651	positive regulation of cytoplasmic transport	6/1773	13/18862	0.000655858	0.00433796	0.00321125	25930/23011/5962/4478/7430/4133	6
GO:0043401	BP	GO:0043401	steroid hormone mediated signaling pathway	25/1773	134/18862	0.000663264	0.00438168	0.00324361	10424/23376/79876/10498/10013/7337/9667/3065/5058/3301/8289/23019/5536/51569/6597/11331/6422/5245/6294/1655/7533/142/11315/811/10521	25
GO:0048678	BP	GO:0048678	response to axon injury	17/1773	77/18862	0.000670256	0.00442257	0.00327388	23098/581/5604/4035/1719/5792/5905/5764/378/6647/3956/1495/2596/335/1809/2316/4131	17
GO:1901998	BP	GO:1901998	toxin transport	11/1773	39/18862	0.000688082	0.00453475	0.00335692	3301/23256/9276/22948/10574/10575/6950/7203/10576/10694/3309	11
GO:0061640	BP	GO:0061640	cytoskeleton-dependent cytokinesis	20/1773	98/18862	0.000692363	0.00455751	0.00337377	388/5921/23636/11258/9798/51510/6651/23157/55964/10015/10097/403/387/10096/10801/375/4735/989/55752/6711	20
GO:0006378	BP	GO:0006378	mRNA polyadenylation	12/1773	45/18862	0.000694745	0.00456772	0.00338133	79577/54623/29894/79869/8189/51692/81608/1478/6829/11052/11051/6626	12
GO:0035304	BP	GO:0035304	regulation of protein dephosphorylation	26/1773	142/18862	0.000702764	0.00461386	0.00341549	5524/84687/261726/5610/51400/5529/8189/55291/5300/151987/5510/4659/26472/5764/2932/2029/2280/6418/5725/7529/5518/7184/801/805/808/7531	26
GO:0035794	BP	GO:0035794	positive regulation of mitochondrial membrane permeability	15/1773	64/18862	0.000705117	0.00461386	0.00341549	23593/4836/2931/581/10449/2932/292/7417/7533/7529/7532/10971/3303/7531/7534	15
GO:0051893	BP	GO:0051893	regulation of focal adhesion assembly	15/1773	64/18862	0.000705117	0.00461386	0.00341549	5786/57669/4035/9748/23122/23332/5879/6422/23603/8826/387/55920/23499/7414/71	15
GO:0090109	BP	GO:0090109	regulation of cell-substrate junction assembly	15/1773	64/18862	0.000705117	0.00461386	0.00341549	5786/57669/4035/9748/23122/23332/5879/6422/23603/8826/387/55920/23499/7414/71	15
GO:1903364	BP	GO:1903364	positive regulation of cellular protein catabolic process	27/1773	150/18862	0.000737025	0.00481692	0.00356581	975/2931/7917/23640/5716/4035/207/10134/29978/29979/1191/6923/2932/6449/5704/5702/5962/5700/55737/5701/4478/10399/7415/3320/7430/3303/3304	27
GO:0051881	BP	GO:0051881	regulation of mitochondrial membrane potential	16/1773	71/18862	0.000753024	0.00491565	0.00363889	23593/581/207/10550/30968/2805/4719/23530/6647/10935/4137/1192/10399/142/11315/7415	16
GO:0045185	BP	GO:0045185	maintenance of protein location	19/1773	92/18862	0.000800433	0.00521461	0.0038602	1020/25777/5716/207/11344/5756/55704/9908/5905/6717/6500/7295/7529/11315/3309/1627/7114/3192/2316	19
GO:0035372	BP	GO:0035372	protein localization to microtubule	7/1773	18/18862	0.000802613	0.00521461	0.0038602	1729/283489/22924/4130/10982/22919/3192	7
GO:0071786	BP	GO:0071786	endoplasmic reticulum tubular network organization	7/1773	18/18862	0.000802613	0.00521461	0.0038602	22930/80856/25782/51062/10890/22931/57142	7
GO:1901673	BP	GO:1901673	regulation of mitotic spindle assembly	7/1773	18/18862	0.000802613	0.00521461	0.0038602	4733/51510/1104/7175/3303/3304/3192	7
GO:0005980	BP	GO:0005980	glycogen catabolic process	8/1773	23/18862	0.000809201	0.00523886	0.00387815	178/283209/55276/5500/5499/5236/801/3146	8
GO:0009226	BP	GO:0009226	nucleotide-sugar biosynthetic process	8/1773	23/18862	0.000809201	0.00523886	0.00387815	4351/5238/55577/7264/54187/10007/7360/7358	8
GO:0070841	BP	GO:0070841	inclusion body assembly	8/1773	23/18862	0.000809201	0.00523886	0.00387815	10013/1191/3337/5705/4137/7415/3303/3304	8
GO:0010811	BP	GO:0010811	positive regulation of cell-substrate adhesion	23/1773	121/18862	0.000818707	0.00529417	0.0039191	6251/57669/3611/7264/51144/1398/1785/5764/708/2932/4192/2244/10109/1399/2266/5879/6422/8826/5034/2335/335/811/2316	23
GO:0006301	BP	GO:0006301	postreplication repair	13/1773	52/18862	0.000823264	0.0053174	0.00393629	55666/5984/5982/5424/9100/6119/4436/6118/6117/7334/5111/7415/6233	13
GO:0009452	BP	GO:0009452	7-methylguanosine RNA capping	10/1773	34/18862	0.000835206	0.0053756	0.00397937	5434/5432/23070/8731/5430/2962/5437/4686/6829/5431	10
GO:0036260	BP	GO:0036260	RNA capping	10/1773	34/18862	0.000835206	0.0053756	0.00397937	5434/5432/23070/8731/5430/2962/5437/4686/6829/5431	10
GO:0051294	BP	GO:0051294	establishment of spindle orientation	10/1773	34/18862	0.000835206	0.0053756	0.00397937	9183/23332/6993/3996/3688/55968/5048/1639/4134/4926	10
GO:0090307	BP	GO:0090307	mitotic spindle assembly	15/1773	65/18862	0.00083822	0.0053887	0.00398907	23122/4733/23332/51510/7756/1104/8243/7175/387/9126/3837/3303/3304/3192/2316	15
GO:0005978	BP	GO:0005978	glycogen biosynthetic process	12/1773	46/18862	0.000860593	0.0055132	0.00408124	178/10580/2931/283209/207/9852/55276/5500/2932/7360/5499/5236	12
GO:0009250	BP	GO:0009250	glucan biosynthetic process	12/1773	46/18862	0.000860593	0.0055132	0.00408124	178/10580/2931/283209/207/9852/55276/5500/2932/7360/5499/5236	12
GO:0043631	BP	GO:0043631	RNA polyadenylation	12/1773	46/18862	0.000860593	0.0055132	0.00408124	79577/54623/29894/79869/8189/51692/81608/1478/6829/11052/11051/6626	12
GO:0019068	BP	GO:0019068	virion assembly	11/1773	40/18862	0.000869425	0.00555685	0.00411355	89853/5091/7251/28972/51510/51160/81876/51534/10015/1656/6233	11
GO:1904591	BP	GO:1904591	positive regulation of protein import	11/1773	40/18862	0.000869425	0.00555685	0.00411355	8882/57506/10204/9141/5594/23435/7175/3843/5901/10155/2316	11
GO:1903008	BP	GO:1903008	organelle disassembly	21/1773	107/18862	0.000881727	0.00562894	0.00416691	28985/51024/23376/79876/2931/10013/493856/1459/7443/81631/8562/51569/10059/11140/2017/11331/3799/10075/7416/11315/7415	21
GO:0031032	BP	GO:0031032	actomyosin structure organization	32/1773	191/18862	0.000916004	0.00584098	0.00432388	408/57669/10580/399687/5058/2314/4089/10391/1465/1073/23122/23332/29767/2037/5573/55704/7791/8452/9124/7082/2035/1466/10015/5217/5879/23136/6422/387/9948/5062/335/71	32
GO:0048488	BP	GO:0048488	synaptic vesicle endocytosis	14/1773	59/18862	0.000921993	0.00585881	0.00433708	1020/6456/26052/5532/9892/8301/382/6857/1785/10059/6455/821/801/808	14
GO:0140238	BP	GO:0140238	presynaptic endocytosis	14/1773	59/18862	0.000921993	0.00585881	0.00433708	1020/6456/26052/5532/9892/8301/382/6857/1785/10059/6455/821/801/808	14
GO:1904589	BP	GO:1904589	regulation of protein import	14/1773	59/18862	0.000921993	0.00585881	0.00433708	8882/57506/23636/10204/51569/9141/5594/23435/7175/3843/5901/10155/2316/3312	14
GO:0034404	BP	GO:0034404	nucleobase-containing small molecule biosynthetic process	22/1773	115/18862	0.000962428	0.00610849	0.00452191	131870/25939/1841/4860/23098/11165/7372/2876/3251/4521/4507/1267/3094/8833/79077/11164/38/1854/3615/11332/4830/7415	22
GO:1901653	BP	GO:1901653	cellular response to peptide	56/1773	391/18862	0.000963505	0.00610849	0.00452191	1020/5786/51382/26060/5770/9114/10580/528/84687/2931/4218/6430/55198/51606/8473/5058/23191/4976/2885/4035/207/529/6599/5577/57727/5576/64710/5781/5573/9181/51510/8396/1398/5471/10890/5905/4141/2805/5567/2932/8615/523/526/988/10476/2058/328/231/9349/2950/142/5591/7532/5315/4131/7431	56
GO:0031114	BP	GO:0031114	regulation of microtubule depolymerization	9/1773	29/18862	0.000986193	0.00624513	0.00462306	10013/4130/55201/50810/23122/23332/9181/11075/4131	9
GO:0000302	BP	GO:0000302	response to reactive oxygen species	36/1773	224/18862	0.000999435	0.00630738	0.00466914	388/10013/7337/116988/2876/54936/207/1719/847/824/6648/1398/1785/5536/10131/5594/6434/301/6647/10935/4137/2775/328/25824/3066/7295/2950/5111/10399/3184/6188/11315/7001/3939/1938/5052	36
GO:0051648	BP	GO:0051648	vesicle localization	36/1773	224/18862	0.000999435	0.00630738	0.00466914	1020/5537/10652/26052/60412/10016/9892/10972/8943/8301/55291/23122/10959/54874/23332/9632/1785/81876/4646/23256/8452/22872/6396/10484/4905/8615/10342/9554/8775/3799/375/10540/5048/81/4133/1778	36
GO:0034446	BP	GO:0034446	substrate adhesion-dependent cell spreading	21/1773	108/18862	0.000999462	0.00630738	0.00466914	3611/3685/1398/1785/708/4192/2244/2192/10109/1399/2266/5879/23603/387/55920/5034/81/2335/335/811/2316	21
GO:0021549	BP	GO:0021549	cerebellum development	19/1773	94/18862	0.00105207	0.00660962	0.00489287	1020/23385/27089/5058/5604/4204/1272/5781/1398/5764/136319/471/1399/2618/6712/58155/3184/3309/1152	19
GO:0044794	BP	GO:0044794	positive regulation by host of viral process	6/1773	14/18862	0.00105676	0.00660962	0.00489287	5091/64710/9218/5479/1072/3312	6
GO:0045898	BP	GO:0045898	regulation of RNA polymerase II transcription preinitiation complex assembly	6/1773	14/18862	0.00105676	0.00660962	0.00489287	5704/5702/5706/5705/5701/3146	6
GO:0051290	BP	GO:0051290	protein heterotetramerization	6/1773	14/18862	0.00105676	0.00660962	0.00489287	79869/11052/10056/2193/11051/6240	6
GO:0071474	BP	GO:0071474	cellular hyperosmotic response	6/1773	14/18862	0.00105676	0.00660962	0.00489287	9181/3954/6513/231/7520/2547	6
GO:0090239	BP	GO:0090239	regulation of histone H4 acetylation	6/1773	14/18862	0.00105676	0.00660962	0.00489287	408/11143/10269/55677/6598/1487	6
GO:1901836	BP	GO:1901836	regulation of transcription of nucleolar large rRNA by RNA polymerase I	6/1773	14/18862	0.00105676	0.00660962	0.00489287	6598/4141/6597/55506/9555/4691	6
GO:0010569	BP	GO:0010569	regulation of double-strand break repair via homologous recombination	12/1773	47/18862	0.00105816	0.00660962	0.00489287	57599/5531/54386/23347/151987/23028/56893/10097/6118/7158/2521/142	12
GO:0016574	BP	GO:0016574	histone ubiquitination	12/1773	47/18862	0.00105816	0.00660962	0.00489287	8450/79577/54623/9320/29128/23028/6500/10075/55611/1642/7334/11315	12
GO:0010762	BP	GO:0010762	regulation of fibroblast migration	10/1773	35/18862	0.00107192	0.00667283	0.00493967	26060/55198/5058/207/3688/9219/5879/23603/55920/9590	10
GO:0060338	BP	GO:0060338	regulation of type I interferon-mediated signaling pathway	10/1773	35/18862	0.00107192	0.00667283	0.00493967	25939/5770/57506/51441/5781/6059/103/23170/3093/11140	10
GO:1901030	BP	GO:1901030	positive regulation of mitochondrial outer membrane permeabilization involved in apoptotic signaling pathway	10/1773	35/18862	0.00107192	0.00667283	0.00493967	4836/2931/581/2932/7533/7529/7532/10971/7531/7534	10
GO:0034383	BP	GO:0034383	low-density lipoprotein particle clearance	11/1773	41/18862	0.00108858	0.00676888	0.00501078	10330/1175/1211/1173/160/161/163/302/8570/1213/3190	11
GO:0071806	BP	GO:0071806	protein transmembrane transport	14/1773	60/18862	0.0011002	0.0068257	0.00505283	10972/23480/10452/10469/56993/92609/6729/9131/1191/10952/9868/3309/3329/3312	14
GO:1902110	BP	GO:1902110	positive regulation of mitochondrial membrane permeability involved in apoptotic process	14/1773	60/18862	0.0011002	0.0068257	0.00505283	4836/2931/581/10449/2932/292/7417/7533/7529/7532/10971/3303/7531/7534	14
GO:0031589	BP	GO:0031589	cell-substrate adhesion	52/1773	359/18862	0.0011135	0.00689969	0.0051076	1020/5786/6251/5921/57669/613/3611/10580/3685/7264/4035/10391/9748/23122/8573/51144/3897/23332/1398/7791/1785/5764/6904/708/3673/2932/4192/3688/11151/2244/2192/2017/10109/1399/2266/5879/87/6422/23603/8826/387/55920/23499/7414/5034/3956/81/2335/335/811/2316/71	52
GO:0009251	BP	GO:0009251	glucan catabolic process	8/1773	24/18862	0.00111463	0.00689969	0.0051076	178/283209/55276/5500/5499/5236/801/3146	8
GO:0006479	BP	GO:0006479	protein methylation	29/1773	170/18862	0.00116455	0.00719179	0.00532384	54623/55677/10498/22938/25940/546/8473/6830/80335/2091/4204/4089/23168/80349/2935/23028/2107/10419/6598/1786/23170/5110/26097/283742/6634/9555/3276/51504/3009	29
GO:0008213	BP	GO:0008213	protein alkylation	29/1773	170/18862	0.00116455	0.00719179	0.00532384	54623/55677/10498/22938/25940/546/8473/6830/80335/2091/4204/4089/23168/80349/2935/23028/2107/10419/6598/1786/23170/5110/26097/283742/6634/9555/3276/51504/3009	29
GO:1904292	BP	GO:1904292	regulation of ERAD pathway	7/1773	19/18862	0.00116836	0.00719179	0.00532384	7917/10134/29978/29979/9097/51035/6449	7
GO:1990182	BP	GO:1990182	exosomal secretion	7/1773	19/18862	0.00116836	0.00719179	0.00532384	8027/6386/7251/10987/9146/10015/7879	7
GO:2000369	BP	GO:2000369	regulation of clathrin-dependent endocytosis	7/1773	19/18862	0.00116836	0.00719179	0.00532384	55681/60682/22848/6456/9892/29978/1785	7
GO:0050808	BP	GO:0050808	synapse organization	58/1773	412/18862	0.00120035	0.00738051	0.00546354	1020/1948/56850/26052/10082/10013/7337/23114/10243/23191/23184/4976/10160/4204/4897/375790/10939/382/6780/5300/23085/5792/3897/79012/10152/23654/119/5764/378/1496/10059/28988/2017/1981/1399/1488/10097/55737/87/6712/387/4137/4076/2823/2239/375/1639/55752/2596/7415/1627/2316/203068/1072/4131/3312/7534/71	58
GO:0007084	BP	GO:0007084	mitotic nuclear envelope reassembly	5/1773	10/18862	0.00122749	0.00749291	0.00554674	7443/2010/5515/8815/5518	5
GO:0019852	BP	GO:0019852	L-ascorbic acid metabolic process	5/1773	10/18862	0.00122749	0.00749291	0.00554674	9446/1528/6513/1727/10327	5
GO:0030388	BP	GO:0030388	fructose 1,6-bisphosphate metabolic process	5/1773	10/18862	0.00122749	0.00749291	0.00554674	5214/230/5213/5211/226	5
GO:0051342	BP	GO:0051342	regulation of cyclic-nucleotide phosphodiesterase activity	5/1773	10/18862	0.00122749	0.00749291	0.00554674	9049/10399/801/805/808	5
GO:0101024	BP	GO:0101024	mitotic nuclear membrane organization	5/1773	10/18862	0.00122749	0.00749291	0.00554674	7443/2010/5515/8815/5518	5
GO:1990416	BP	GO:1990416	cellular response to brain-derived neurotrophic factor stimulus	5/1773	10/18862	0.00122749	0.00749291	0.00554674	6456/7337/4137/9775/1938	5
GO:0010038	BP	GO:0010038	response to metal ion	51/1773	352/18862	0.00122817	0.00749291	0.00554674	1788/23385/1841/10016/1528/2931/8604/29957/10243/8836/10165/3485/207/2539/847/310/4521/6648/6857/48/6652/2937/1965/9361/22872/5536/2805/2244/5860/23327/5594/682/5515/2266/27101/5499/6647/8826/4137/118/25932/5111/3184/142/11315/811/3309/2664/801/805/808	51
GO:0007020	BP	GO:0007020	microtubule nucleation	9/1773	30/18862	0.00129261	0.00785996	0.00581846	10142/7283/4204/23122/23332/9793/1639/3303/3304	9
GO:0060148	BP	GO:0060148	positive regulation of posttranscriptional gene silencing	9/1773	30/18862	0.00129261	0.00785996	0.00581846	5605/5604/8087/57510/9698/1981/1656/1655/1660	9
GO:0061842	BP	GO:0061842	microtubule organizing center localization	9/1773	30/18862	0.00129261	0.00785996	0.00581846	10142/25777/4682/5362/10092/1783/3799/23224/7430	9
GO:0048511	BP	GO:0048511	rhythmic process	44/1773	294/18862	0.00134572	0.00817382	0.0060508	1020/408/4704/7337/3065/8473/8451/8879/10135/25942/7150/5936/7153/10419/1457/5500/9112/5764/10059/2932/4192/7874/9967/23435/5499/55269/57805/3615/10075/1642/3066/1655/11335/191/5111/10399/3184/10236/6421/3309/1660/5591/4841/3192	44
GO:0019985	BP	GO:0019985	translesion synthesis	11/1773	42/18862	0.0013513	0.00819867	0.00606919	55666/5984/5982/5424/9100/6119/6118/6117/5111/7415/6233	11
GO:0021543	BP	GO:0021543	pallium development	27/1773	156/18862	0.00135696	0.00822394	0.00608791	1020/8891/27089/25777/84687/23236/3065/581/4035/1459/22803/23028/1398/55236/6513/79969/2932/471/6434/1399/2618/3799/4830/5048/23224/57142/2316	27
GO:0031062	BP	GO:0031062	positive regulation of histone methylation	10/1773	36/18862	0.00136074	0.00822872	0.00609144	54623/22938/8473/4204/4089/23168/80349/1786/26097/3009	10
GO:0050779	BP	GO:0050779	RNA destabilization	10/1773	36/18862	0.00136074	0.00822872	0.00609144	26058/51441/9698/10658/79068/5976/23435/8570/3184/10236	10
GO:0009123	BP	GO:0009123	nucleoside monophosphate metabolic process	16/1773	75/18862	0.00140489	0.0084864	0.0062822	1841/51727/7372/158/3251/204/8573/5471/8833/5198/203/471/2618/1854/3615/10606	16
GO:0031345	BP	GO:0031345	negative regulation of cell projection organization	30/1773	180/18862	0.00141599	0.00854405	0.00632487	1020/1948/26052/10498/2931/7337/112755/4035/53335/1630/382/1785/22902/5217/387/3066/2288/11075/832/4134/396/3956/7533/57142/2664/4133/1809/2316/1400/7431	30
GO:0006851	BP	GO:0006851	mitochondrial calcium ion transmembrane transport	8/1773	25/18862	0.00150543	0.00905396	0.00670234	9512/4976/10939/30968/3954/11331/5245/7416	8
GO:0044247	BP	GO:0044247	cellular polysaccharide catabolic process	8/1773	25/18862	0.00150543	0.00905396	0.00670234	178/283209/55276/5500/5499/5236/801/3146	8
GO:0060765	BP	GO:0060765	regulation of androgen receptor signaling pathway	8/1773	25/18862	0.00150543	0.00905396	0.00670234	10013/9667/3065/6597/6422/5245/1655/11315	8
GO:0070527	BP	GO:0070527	platelet aggregation	14/1773	62/18862	0.00154396	0.00925532	0.0068514	3611/1465/2778/6812/2244/2266/10627/7414/1192/7094/3315/2335/2316/71	14
GO:1902686	BP	GO:1902686	mitochondrial outer membrane permeabilization involved in programmed cell death	14/1773	62/18862	0.00154396	0.00925532	0.0068514	4836/2931/581/10449/2932/292/7417/7533/7529/7532/10971/3303/7531/7534	14
GO:2000756	BP	GO:2000756	regulation of peptidyl-lysine acetylation	14/1773	62/18862	0.00154396	0.00925532	0.0068514	408/11143/10269/55677/84681/4089/84656/25942/6598/1487/10856/3066/6418/11315	14
GO:1903532	BP	GO:1903532	positive regulation of secretion by cell	41/1773	271/18862	0.00156363	0.00936304	0.00693114	1020/23413/84932/22930/7447/5532/5868/10972/8027/25930/6386/399687/7251/112755/4089/4035/23122/382/6857/23332/164/9146/5781/8618/10059/9255/6812/29085/2244/6717/23435/10015/5019/2266/5879/3799/8655/7879/2746/375/7430	41
GO:0010212	BP	GO:0010212	response to ionizing radiation	25/1773	142/18862	0.00156913	0.00938576	0.00694796	867/388/10269/1788/581/2876/2885/84328/64710/23028/1785/9112/3735/301/4436/6240/6422/7158/1936/7520/8091/142/2547/3309/5591	25
GO:0090559	BP	GO:0090559	regulation of membrane permeability	18/1773	90/18862	0.00159719	0.00954324	0.00706454	23593/4836/2931/581/6993/1267/10449/2932/10015/292/7417/7533/7529/7532/10971/3303/7531/7534	18
GO:0008088	BP	GO:0008088	axo-dendritic transport	15/1773	69/18862	0.00160307	0.00955763	0.00707519	55860/4130/8943/4976/23011/6647/3799/4137/5048/3315/6421/4133/1778/3192/3312	15
GO:1905710	BP	GO:1905710	positive regulation of membrane permeability	15/1773	69/18862	0.00160307	0.00955763	0.00707519	23593/4836/2931/581/10449/2932/292/7417/7533/7529/7532/10971/3303/7531/7534	15
GO:1903828	BP	GO:1903828	negative regulation of cellular protein localization	21/1773	112/18862	0.00161526	0.00960761	0.00711219	1020/4130/8301/25942/382/3301/5905/51569/1173/9201/2932/10434/23327/55968/4137/7295/9555/1495/11315/2664/1213	21
GO:0006388	BP	GO:0006388	tRNA splicing, via endonucleolytic cleavage and ligation	6/1773	15/18862	0.00162193	0.00960761	0.00711219	29894/1478/51637/283742/51493/1653	6
GO:0019321	BP	GO:0019321	pentose metabolic process	6/1773	15/18862	0.00162193	0.00960761	0.00711219	2539/51181/11164/6888/5226/7086	6
GO:0035635	BP	GO:0035635	entry of bacterium into host cell	6/1773	15/18862	0.00162193	0.00960761	0.00711219	867/23265/55770/3685/2885/1500	6
GO:0051284	BP	GO:0051284	positive regulation of sequestering of calcium ion	6/1773	15/18862	0.00162193	0.00960761	0.00711219	9446/6717/2946/801/805/808	6
GO:1903543	BP	GO:1903543	positive regulation of exosomal secretion	6/1773	15/18862	0.00162193	0.00960761	0.00711219	8027/6386/7251/9146/10015/7879	6
GO:1901983	BP	GO:1901983	regulation of protein acetylation	16/1773	76/18862	0.00162712	0.009628	0.00712729	408/11143/10269/55677/84681/54386/4089/84656/25942/6598/2932/1487/10856/3066/6418/11315	16
GO:1902652	BP	GO:1902652	secondary alcohol metabolic process	27/1773	158/18862	0.00164552	0.00972641	0.00720013	4597/1717/50814/1718/1595/2539/847/4047/3069/3930/10654/11160/2222/10449/1727/3422/2224/39/6647/47/336/3417/3837/3418/2194/335/5901	27
GO:0046931	BP	GO:0046931	pore complex assembly	7/1773	20/18862	0.0016528	0.0097381	0.00720878	25909/23165/9688/4301/7203/57142/10694	7
GO:0097734	BP	GO:0097734	extracellular exosome biogenesis	7/1773	20/18862	0.0016528	0.0097381	0.00720878	8027/6386/7251/10987/9146/10015/7879	7
GO:1902176	BP	GO:1902176	negative regulation of oxidative stress-induced intrinsic apoptotic signaling pathway	7/1773	20/18862	0.0016528	0.0097381	0.00720878	2876/207/6648/10131/3315/11315/4841	7
GO:0034243	BP	GO:0034243	regulation of transcription elongation from RNA polymerase II promoter	9/1773	31/18862	0.00167132	0.00982617	0.00727398	7469/79577/25920/51497/6830/2962/10915/11198/3192	9
GO:0045070	BP	GO:0045070	positive regulation of viral genome replication	9/1773	31/18862	0.00167132	0.00982617	0.00727398	5586/6780/23367/7153/9217/103/51495/1642/7155	9
GO:0010950	BP	GO:0010950	positive regulation of endopeptidase activity	30/1773	182/18862	0.00169085	0.00993038	0.00735113	408/23385/51079/54205/444/10016/11047/51024/581/5721/56616/8301/10197/10134/10550/3092/9131/5720/10213/10541/26999/9141/1509/3336/4137/10399/6188/7415/3329/3146	30
GO:0009225	BP	GO:0009225	nucleotide-sugar metabolic process	10/1773	37/18862	0.00170976	0.0100307	0.00742541	4351/2931/5238/55577/7264/54187/10007/7360/56886/7358	10
GO:0060996	BP	GO:0060996	dendritic spine development	19/1773	98/18862	0.00176214	0.010327	0.00764472	1020/26052/10013/7337/4976/382/1982/10152/55236/378/10059/28988/10097/3066/4076/5062/375/1627/1072	19
GO:0008360	BP	GO:0008360	regulation of cell shape	26/1773	151/18862	0.00177763	0.0104067	0.00770374	388/10269/5921/114793/1729/5362/23191/2909/10428/23580/1398/23654/5764/2035/11151/5962/301/5879/23136/387/9948/4478/989/2335/7430/226	26
GO:0030099	BP	GO:0030099	myeloid cell differentiation	58/1773	419/18862	0.00178504	0.010439	0.00772764	975/11143/60682/2551/79577/54623/23376/79876/3065/57095/8451/7037/2539/80349/25942/6729/5781/103/3692/3930/84293/2739/2778/22985/6194/10935/87/6422/118/9948/3149/4830/6223/3276/6208/3313/302/142/3148/2194/5591/3303/3304/3146/8294/8359/8360/8361/8362/8363/8364/8365/8366/8367/8368/8370/121504/554313	58
GO:0098813	BP	GO:0098813	nuclear chromosome segregation	41/1773	273/18862	0.00179965	0.0105132	0.00778257	283489/80218/23636/9183/81929/546/7283/8260/7917/4361/27436/64151/23244/51143/9918/51510/7153/23126/23047/8452/7756/10592/10051/11331/10097/8243/7175/10726/55920/10096/9184/9126/10540/9555/7155/3837/6421/4926/5901/1778/3192	41
GO:0034614	BP	GO:0034614	cellular response to reactive oxygen species	27/1773	159/18862	0.0018086	0.0105543	0.00781299	388/10013/116988/54936/207/1719/6648/1398/1785/5536/10131/5594/301/6647/10935/4137/328/25824/3066/7295/5111/10399/3184/6188/11315/7001/5052	27
GO:0106027	BP	GO:0106027	neuron projection organization	18/1773	91/18862	0.00181957	0.0106071	0.00785205	1020/26052/10013/7337/4130/4976/10152/10059/28988/2932/2017/10097/55737/4076/375/1639/1627/1072	18
GO:0010822	BP	GO:0010822	positive regulation of mitochondrion organization	17/1773	84/18862	0.00186019	0.010821	0.00801039	51024/4836/2931/581/4976/10059/2932/9141/55737/7416/7533/7529/11315/7532/10971/7531/7534	17
GO:1900407	BP	GO:1900407	regulation of cellular response to oxidative stress	17/1773	84/18862	0.00186019	0.010821	0.00801039	10013/2876/207/1719/6648/29979/10314/10131/6647/7295/5034/3315/10399/142/6421/11315/4841	17
GO:0006879	BP	GO:0006879	cellular iron ion homeostasis	15/1773	70/18862	0.00186623	0.0108447	0.00802793	3163/9114/4682/552900/654483/7037/8454/4089/2495/48/10539/523/6717/6500/6647	15
GO:0032481	BP	GO:0032481	positive regulation of type I interferon production	16/1773	77/18862	0.0018781	0.0109021	0.00807046	5434/57506/85364/5437/4361/10211/5781/9868/7520/3148/2547/3320/1660/5591/3329/3146	16
GO:0042493	BP	GO:0042493	response to drug	51/1773	359/18862	0.00188745	0.0109448	0.0081021	408/1788/4860/5825/84687/7372/8836/7037/3485/847/22949/10550/63826/5577/6648/642/4659/7150/6652/5471/5764/55031/2778/3673/1503/5198/5860/6730/5019/1399/301/9343/6647/6422/6185/5245/2775/328/7385/3066/4830/4176/7520/8091/3956/335/811/3309/3939/1938/4131	51
GO:0071375	BP	GO:0071375	cellular response to peptide hormone stimulus	47/1773	325/18862	0.00193745	0.0112229	0.00830796	5786/51382/26060/5770/9114/10580/528/2931/4218/6430/55198/51606/8473/5058/23191/4976/2885/207/529/6599/5577/57727/5576/64710/5781/5573/8396/1398/5471/10890/5905/4141/2805/5567/2932/8615/523/526/988/2058/328/2950/142/5591/7532/5315/4131	47
GO:0010952	BP	GO:0010952	positive regulation of peptidase activity	32/1773	200/18862	0.00198803	0.0115038	0.00851589	408/23385/51079/54205/444/10016/11047/51024/581/5721/56616/8301/10197/10134/10550/3092/9131/5720/10213/10541/26999/2192/9141/1509/3336/4137/10399/6188/2335/7415/3329/3146	32
GO:0022616	BP	GO:0022616	DNA strand elongation	8/1773	26/18862	0.00199734	0.0115456	0.0085468	3978/5984/4361/3980/64710/4176/5111/4172	8
GO:0006904	BP	GO:0006904	vesicle docking involved in exocytosis	11/1773	44/18862	0.00203294	0.011739	0.00868998	23233/11311/10652/60412/4218/112755/6616/23256/10890/6812/1488	11
GO:1903322	BP	GO:1903322	positive regulation of protein modification by small protein conjugation or removal	24/1773	137/18862	0.0020626	0.0118978	0.00880751	408/57599/54165/10016/2931/7337/23640/5716/5300/29979/23028/7332/9112/8452/9733/2280/6500/10055/10054/10075/7334/6187/7415/3309	24
GO:0019042	BP	GO:0019042	viral latency	5/1773	11/18862	0.00207673	0.0119417	0.00884007	64710/8815/11168/7520/2547	5
GO:0045899	BP	GO:0045899	positive regulation of RNA polymerase II transcription preinitiation complex assembly	5/1773	11/18862	0.00207673	0.0119417	0.00884007	5704/5702/5706/5705/5701	5
GO:1902855	BP	GO:1902855	regulation of non-motile cilium assembly	5/1773	11/18862	0.00207673	0.0119417	0.00884007	1785/8655/10801/4134/989	5
GO:0038127	BP	GO:0038127	ERBB signaling pathway	25/1773	145/18862	0.00211408	0.0121438	0.00898967	867/89853/6456/5782/29924/8027/8065/23636/7251/2885/207/3092/9146/5781/55704/58513/183/378/5335/11140/5594/8826/7879/57142/3320	25
GO:0034109	BP	GO:0034109	homotypic cell-cell adhesion	17/1773	85/18862	0.00212569	0.0121717	0.0090103	3611/1465/1525/2778/6812/2244/5962/2266/10627/7414/1192/7094/3956/3315/2335/2316/71	17
GO:0032507	BP	GO:0032507	maintenance of protein location in cell	14/1773	64/18862	0.00212756	0.0121717	0.0090103	1020/25777/207/11344/5756/55704/5905/6500/7295/11315/3309/1627/7114/3192	14
GO:1905268	BP	GO:1905268	negative regulation of chromatin organization	14/1773	64/18862	0.00212756	0.0121717	0.0090103	9320/6830/25942/23028/6598/1786/3024/1487/3005/55611/9555/6418/8971/3009	14
GO:0042307	BP	GO:0042307	positive regulation of protein import into nucleus	10/1773	38/18862	0.00212778	0.0121717	0.0090103	8882/57506/10204/5594/23435/7175/3843/5901/10155/2316	10
GO:0051651	BP	GO:0051651	maintenance of location in cell	33/1773	209/18862	0.00213092	0.012177	0.00901423	1020/10142/25777/9446/1729/581/8943/207/11344/5756/2495/55704/10523/3954/5905/11151/5335/6717/2280/6500/2946/7295/309/11315/7184/811/3309/1627/7114/3192/801/805/808	33
GO:0043543	BP	GO:0043543	protein acylation	37/1773	242/18862	0.00213683	0.0121981	0.00902986	408/11143/9329/10269/8295/55677/4836/84681/55226/80218/2752/53615/54386/8473/8260/7917/5495/4204/4089/84656/25942/80155/1743/6598/4967/1738/79969/2932/8520/1487/86/8607/4137/10856/3066/6418/11315	37
GO:0016571	BP	GO:0016571	histone methylation	23/1773	130/18862	0.00221403	0.0126257	0.00934639	54623/55677/10498/22938/546/8473/6830/80335/2091/4204/4089/23168/80349/23028/10419/6598/1786/23170/26097/9555/3276/51504/3009	23
GO:1903076	BP	GO:1903076	regulation of protein localization to plasma membrane	19/1773	100/18862	0.00224765	0.0128042	0.00947848	1020/9482/26060/56850/10580/84687/8301/4035/207/382/8417/1173/3688/10434/3799/10399/6711/7430/1213	19
GO:0006293	BP	GO:0006293	nucleotide-excision repair, preincision complex stabilization	7/1773	21/18862	0.00228001	0.0129083	0.00955559	8450/8451/6119/6118/6117/1642/142	7
GO:0006295	BP	GO:0006295	nucleotide-excision repair, DNA incision, 3'-to lesion	7/1773	21/18862	0.00228001	0.0129083	0.00955559	8450/8451/6119/6118/6117/1642/142	7
GO:0033962	BP	GO:0033962	P-body assembly	7/1773	21/18862	0.00228001	0.0129083	0.00955559	80153/11273/27258/23019/25804/1656/1778	7
GO:0034315	BP	GO:0034315	regulation of Arp2/3 complex-mediated actin nucleation	7/1773	21/18862	0.00228001	0.0129083	0.00955559	57175/23191/10152/2764/1496/10787/375	7
GO:0042276	BP	GO:0042276	error-prone translesion synthesis	7/1773	21/18862	0.00228001	0.0129083	0.00955559	5984/5982/6119/6118/6117/5111/6233	7
GO:0043555	BP	GO:0043555	regulation of translation in response to stress	7/1773	21/18862	0.00228001	0.0129083	0.00955559	5610/10959/5936/1965/1981/5499/4869	7
GO:1902882	BP	GO:1902882	regulation of response to oxidative stress	18/1773	93/18862	0.00234312	0.013252	0.00980999	10013/2876/207/1719/6648/29979/10314/10131/6647/7295/9555/5034/3315/10399/142/6421/11315/4841	18
GO:0000394	BP	GO:0000394	RNA splicing, via endonucleolytic cleavage and ligation	6/1773	16/18862	0.0023902	0.0134217	0.00993561	29894/1478/51637/283742/51493/1653	6
GO:0006268	BP	GO:0006268	DNA unwinding involved in DNA replication	6/1773	16/18862	0.0023902	0.0134217	0.00993561	5965/6742/6117/4176/4175/4171	6
GO:0009200	BP	GO:0009200	deoxyribonucleoside triphosphate metabolic process	6/1773	16/18862	0.0023902	0.0134217	0.00993561	131870/25939/1841/4521/79077/1854	6
GO:0032239	BP	GO:0032239	regulation of nucleobase-containing compound transport	6/1773	16/18862	0.0023902	0.0134217	0.00993561	54888/55677/6830/11052/7175/1660	6
GO:0051014	BP	GO:0051014	actin filament severing	6/1773	16/18862	0.0023902	0.0134217	0.00993561	2314/1073/822/2764/11034/1072	6
GO:0061684	BP	GO:0061684	chaperone-mediated autophagy	6/1773	16/18862	0.0023902	0.0134217	0.00993561	1917/1191/6625/3320/1915/3312	6
GO:1903541	BP	GO:1903541	regulation of exosomal secretion	6/1773	16/18862	0.0023902	0.0134217	0.00993561	8027/6386/7251/9146/10015/7879	6
GO:0044380	BP	GO:0044380	protein localization to cytoskeleton	13/1773	58/18862	0.00240636	0.0134712	0.00997227	84687/1729/283489/22924/23636/4130/10982/2932/55968/22919/10540/4926/3192	13
GO:0045815	BP	GO:0045815	positive regulation of gene expression, epigenetic	13/1773	58/18862	0.00240636	0.0134712	0.00997227	5434/9188/5437/9031/3024/8289/8467/3005/7913/9555/23451/8971/3009	13
GO:0046128	BP	GO:0046128	purine ribonucleoside metabolic process	13/1773	58/18862	0.00240636	0.0134712	0.00997227	79631/4860/4976/3251/9567/2773/4507/8573/8833/3615/4830/191/5901	13
GO:0007029	BP	GO:0007029	endoplasmic reticulum organization	17/1773	86/18862	0.00242217	0.0135322	0.0100174	22930/8266/439/80856/7917/57698/25782/23344/10959/51062/9217/7905/10890/22872/22931/6449/57142	17
GO:0055072	BP	GO:0055072	iron ion homeostasis	17/1773	86/18862	0.00242217	0.0135322	0.0100174	3163/4756/9114/4682/552900/654483/7037/8454/4089/8301/2495/48/10539/523/6717/6500/6647	17
GO:0061001	BP	GO:0061001	regulation of dendritic spine morphogenesis	11/1773	45/18862	0.00246588	0.0137624	0.0101879	1020/26052/7337/4976/10152/10059/28988/10097/4076/1627/1072	11
GO:0034381	BP	GO:0034381	plasma lipoprotein particle clearance	14/1773	65/18862	0.00248149	0.0138355	0.010242	10330/1175/3069/1211/1173/160/161/336/163/302/8570/335/1213/3190	14
GO:0048813	BP	GO:0048813	dendrite morphogenesis	24/1773	139/18862	0.00251517	0.0140091	0.0103704	1020/26052/10013/7337/23098/4976/10160/8301/3251/23011/10152/5764/1496/10059/9201/28988/2932/23327/10097/4076/7533/1627/4133/1072	24
GO:0022037	BP	GO:0022037	metencephalon development	19/1773	101/18862	0.00252976	0.0140761	0.0104201	1020/23385/27089/5058/5604/4204/1272/5781/1398/5764/136319/471/1399/2618/6712/58155/3184/3309/1152	19
GO:1901215	BP	GO:1901215	negative regulation of neuron death	31/1773	195/18862	0.00256232	0.0142429	0.0105435	1020/408/867/1271/5921/8882/4345/581/4204/80331/4035/207/5300/6648/5536/2932/4192/6812/11151/5700/1981/4436/55737/6647/163/5803/6418/10399/11315/4841/10763	31
GO:0000272	BP	GO:0000272	polysaccharide catabolic process	8/1773	27/18862	0.00260742	0.0144352	0.0106859	178/283209/55276/5500/5499/5236/801/3146	8
GO:0007064	BP	GO:0007064	mitotic sister chromatid cohesion	8/1773	27/18862	0.00260742	0.0144352	0.0106859	80218/546/8260/23244/23126/23047/8243/9555	8
GO:0009065	BP	GO:0009065	glutamine family amino acid catabolic process	8/1773	27/18862	0.00260742	0.0144352	0.0106859	2752/5471/2805/80150/23576/2806/2746/23564	8
GO:0032201	BP	GO:0032201	telomere maintenance via semi-conservative replication	8/1773	27/18862	0.00260742	0.0144352	0.0106859	5984/5982/5424/5976/6119/6118/6117/5111	8
GO:1901800	BP	GO:1901800	positive regulation of proteasomal protein catabolic process	20/1773	109/18862	0.00268635	0.0148199	0.0109707	2931/7917/23640/5716/207/10134/29978/29979/1191/6923/2932/6449/5704/5702/5700/5701/10399/7415/3303/3304	20
GO:1902414	BP	GO:1902414	protein localization to cell junction	20/1773	109/18862	0.00268635	0.0148199	0.0109707	1020/28956/56850/10082/4218/4130/10243/112755/6616/8417/7082/3799/4137/2239/5062/7414/3315/1627/2316/71	20
GO:0006356	BP	GO:0006356	regulation of transcription by RNA polymerase I	9/1773	33/18862	0.00269298	0.0148199	0.0109707	10269/6598/4141/6597/7343/55506/9555/4691/2316	9
GO:0009303	BP	GO:0009303	rRNA transcription	9/1773	33/18862	0.00269298	0.0148199	0.0109707	2975/9329/9330/6598/4141/6597/55506/9555/4691	9
GO:0030262	BP	GO:0030262	apoptotic nuclear changes	9/1773	33/18862	0.00269298	0.0148199	0.0109707	1676/581/3836/7153/22985/3005/3837/3148/3146	9
GO:0061014	BP	GO:0061014	positive regulation of mRNA catabolic process	12/1773	52/18862	0.00269306	0.0148199	0.0109707	26058/9567/51441/9698/10658/79068/5976/23019/23435/8570/3184/10236	12
GO:0043393	BP	GO:0043393	regulation of protein binding	31/1773	196/18862	0.00277646	0.0152636	0.0112991	1020/57669/22924/581/4035/8189/2962/207/10211/5300/5792/23028/1398/119/2035/2932/2280/5515/5499/118/10856/6135/22919/488/302/10399/11315/5901/4133/1400/10763	31
GO:0030433	BP	GO:0030433	ubiquitin-dependent ERAD pathway	16/1773	80/18862	0.00283255	0.0155564	0.0115159	55666/23197/201595/23190/7917/10134/29978/29979/10952/11160/9097/6449/5706/7415/7184/3309	16
GO:0009166	BP	GO:0009166	nucleotide catabolic process	15/1773	73/18862	0.00287992	0.0157836	0.011684	131870/25939/4860/23098/11165/2876/3251/4521/1267/3094/79077/38/1854/11332/7415	15
GO:0006513	BP	GO:0006513	protein monoubiquitination	14/1773	66/18862	0.00288251	0.0157836	0.011684	867/8450/79577/57599/54623/10016/63893/7251/8454/29128/8452/6500/10075/1642	14
GO:1902108	BP	GO:1902108	regulation of mitochondrial membrane permeability involved in apoptotic process	14/1773	66/18862	0.00288251	0.0157836	0.011684	4836/2931/581/10449/2932/292/7417/7533/7529/7532/10971/3303/7531/7534	14
GO:0043281	BP	GO:0043281	regulation of cysteine-type endopeptidase activity involved in apoptotic process	32/1773	205/18862	0.00295873	0.0161848	0.011981	408/51079/54205/64780/10016/51024/1718/581/56616/2876/207/10134/10550/3092/9131/10541/1457/55031/9141/1509/10935/3336/4137/25824/5062/10399/6188/11315/7415/3329/3146/7531	32
GO:0099637	BP	GO:0099637	neurotransmitter receptor transport	11/1773	46/18862	0.0029704	0.0162325	0.0120164	56850/26052/4218/8943/112755/6616/3092/1785/55737/3799/163	11
GO:0006085	BP	GO:0006085	acetyl-CoA biosynthetic process	7/1773	22/18862	0.00307579	0.0167089	0.012369	84532/1737/1738/5160/5162/38/47	7
GO:0010288	BP	GO:0010288	response to lead ion	7/1773	22/18862	0.00307579	0.0167089	0.012369	1788/847/5536/5860/5515/5499/4137	7
GO:0048714	BP	GO:0048714	positive regulation of oligodendrocyte differentiation	7/1773	22/18862	0.00307579	0.0167089	0.012369	3065/6009/10419/5764/4192/3066/5803	7
GO:0051220	BP	GO:0051220	cytoplasmic sequestering of protein	7/1773	22/18862	0.00307579	0.0167089	0.012369	5716/9908/6717/7529/1627/7114/2316	7
GO:0051590	BP	GO:0051590	positive regulation of neurotransmitter transport	7/1773	22/18862	0.00307579	0.0167089	0.012369	1020/22930/112755/6857/10059/6812/3688	7
GO:0140112	BP	GO:0140112	extracellular vesicle biogenesis	7/1773	22/18862	0.00307579	0.0167089	0.012369	8027/6386/7251/10987/9146/10015/7879	7
GO:0008203	BP	GO:0008203	cholesterol metabolic process	25/1773	149/18862	0.00308536	0.0167443	0.0123952	4597/1717/50814/1718/1595/2539/847/4047/3069/3930/10654/11160/2222/10449/1727/3422/2224/39/6647/47/336/3837/2194/335/5901	25
GO:0051101	BP	GO:0051101	regulation of DNA binding	21/1773	118/18862	0.00312753	0.0169564	0.0125523	10269/25942/51773/23028/1460/3673/8721/6717/3005/3066/4830/7295/8091/142/3148/11315/10155/7114/801/808/3146	21
GO:0050803	BP	GO:0050803	regulation of synapse structure or activity	33/1773	214/18862	0.00313335	0.0169713	0.0125633	1020/56850/26052/10082/7337/23191/112755/4976/375790/382/79012/10152/1785/5764/378/1496/10059/28988/1981/10097/55737/387/4076/2823/2239/1639/55752/7415/1627/203068/1072/3312/7534	33
GO:0035384	BP	GO:0035384	thioester biosynthetic process	12/1773	53/18862	0.00318908	0.0172223	0.0127491	79966/84532/6576/51144/9524/1737/1738/5160/5162/38/47/2194	12
GO:0051438	BP	GO:0051438	regulation of ubiquitin-protein transferase activity	12/1773	53/18862	0.00318908	0.0172223	0.0127491	54165/5300/7332/10059/6500/6201/6135/7334/9349/6125/6187/11315	12
GO:0071616	BP	GO:0071616	acyl-CoA biosynthetic process	12/1773	53/18862	0.00318908	0.0172223	0.0127491	79966/84532/6576/51144/9524/1737/1738/5160/5162/38/47/2194	12
GO:0007212	BP	GO:0007212	dopamine receptor signaling pathway	10/1773	40/18862	0.00320916	0.0172968	0.0128042	23385/2931/2773/10419/2778/2932/55737/54331/2775/2316	10
GO:1901068	BP	GO:1901068	guanosine-containing compound metabolic process	10/1773	40/18862	0.00320916	0.0172968	0.0128042	79631/4976/3251/9567/2773/8573/8833/3615/4830/5901	10
GO:0000727	BP	GO:0000727	double-strand break repair via break-induced replication	5/1773	12/18862	0.00328609	0.0175396	0.012984	4174/4176/4175/4172/4171	5
GO:0006620	BP	GO:0006620	posttranslational protein targeting to endoplasmic reticulum membrane	5/1773	12/18862	0.00328609	0.0175396	0.012984	23480/439/10952/6449/3309	5
GO:0032968	BP	GO:0032968	positive regulation of transcription elongation from RNA polymerase II promoter	5/1773	12/18862	0.00328609	0.0175396	0.012984	79577/6830/2962/10915/11198	5
GO:0033182	BP	GO:0033182	regulation of histone ubiquitination	5/1773	12/18862	0.00328609	0.0175396	0.012984	9320/23028/55611/7334/11315	5
GO:0046185	BP	GO:0046185	aldehyde catabolic process	5/1773	12/18862	0.00328609	0.0175396	0.012984	3029/2098/10327/128/11315	5
GO:0051095	BP	GO:0051095	regulation of helicase activity	5/1773	12/18862	0.00328609	0.0175396	0.012984	6742/26097/4436/2956/4171	5
GO:0090085	BP	GO:0090085	regulation of protein deubiquitination	5/1773	12/18862	0.00328609	0.0175396	0.012984	57599/9733/51035/11315/7415	5
GO:0110096	BP	GO:0110096	cellular response to aldehyde	5/1773	12/18862	0.00328609	0.0175396	0.012984	2098/231/10327/128/11315	5
GO:1903332	BP	GO:1903332	regulation of protein folding	5/1773	12/18862	0.00328609	0.0175396	0.012984	6449/9141/6625/6767/3309	5
GO:2000767	BP	GO:2000767	positive regulation of cytoplasmic translation	5/1773	12/18862	0.00328609	0.0175396	0.012984	51441/7555/1660/1938/5315	5
GO:2001244	BP	GO:2001244	positive regulation of intrinsic apoptotic signaling pathway	13/1773	60/18862	0.00330316	0.0176137	0.0130388	51024/581/10134/8575/10059/9774/6647/6201/6135/10399/6188/6421/11315	13
GO:0007041	BP	GO:0007041	lysosomal transport	20/1773	111/18862	0.00334324	0.0177929	0.0131715	388/55681/9482/8943/950/81609/7251/4035/51479/164/9146/51510/1191/5660/55737/7879/375/7415/3303/3312	20
GO:0031623	BP	GO:0031623	receptor internalization	20/1773	111/18862	0.00334324	0.0177929	0.0131715	975/408/55681/26052/5868/6386/7037/8301/2885/4035/10211/6616/29978/1785/1173/3688/163/375/7430/1213	20
GO:0031440	BP	GO:0031440	regulation of mRNA 3'-end processing	8/1773	28/18862	0.00335384	0.0178148	0.0131877	79577/54623/79869/4686/6829/11052/11051/6626	8
GO:0090383	BP	GO:0090383	phagosome acidification	8/1773	28/18862	0.00335384	0.0178148	0.0131877	51382/9114/528/51606/529/523/526/7879	8
GO:0051960	BP	GO:0051960	regulation of nervous system development	57/1773	422/18862	0.00336033	0.0178226	0.0131935	1020/58497/57611/8882/23376/8604/22938/55198/3065/5362/5058/5604/23191/4976/57698/4035/375790/6009/207/11344/1630/51441/9798/23011/1982/3897/23028/10419/6993/23654/5764/10059/28988/4192/22902/10097/387/4137/51593/3066/4076/5803/23499/27339/7520/396/4673/1495/7533/3418/57142/3148/2335/1627/2664/4133/4131	57
GO:0006891	BP	GO:0006891	intra-Golgi vesicle-mediated transport	9/1773	34/18862	0.00336178	0.0178226	0.0131935	11316/22818/26958/22820/4905/9276/1315/8775/1314	9
GO:0001956	BP	GO:0001956	positive regulation of neurotransmitter secretion	6/1773	17/18862	0.0034029	0.0179886	0.0133164	1020/22930/112755/6857/10059/6812	6
GO:0010523	BP	GO:0010523	negative regulation of calcium ion transport into cytosol	6/1773	17/18862	0.0034029	0.0179886	0.0133164	9446/6717/2946/801/805/808	6
GO:0042790	BP	GO:0042790	nucleolar large rRNA transcription by RNA polymerase I	6/1773	17/18862	0.0034029	0.0179886	0.0133164	6598/4141/6597/55506/9555/4691	6
GO:0043666	BP	GO:0043666	regulation of phosphoprotein phosphatase activity	21/1773	119/18862	0.00346926	0.0183218	0.013563	5524/84687/261726/5610/51400/5529/55291/151987/5510/4659/26472/5764/2932/2029/2280/6418/5518/7184/801/805/808	21
GO:0072330	BP	GO:0072330	monocarboxylic acid biosynthetic process	34/1773	224/18862	0.00354813	0.0187204	0.0138581	79966/5571/84532/2628/5825/9415/4706/6342/2879/2944/63826/51144/9524/3692/9444/11160/4048/3295/4282/873/51495/10728/301/2946/3028/47/11332/5947/2950/2171/11315/2194/335/5315	34
GO:0006906	BP	GO:0006906	vesicle fusion	19/1773	104/18862	0.00355979	0.0187281	0.0138637	9482/4218/112755/2773/51479/6616/6857/8417/8396/23673/6812/11151/8615/9554/301/3799/7879/302/811	19
GO:0009116	BP	GO:0009116	nucleoside metabolic process	19/1773	104/18862	0.00355979	0.0187281	0.0138637	79631/1841/4860/5636/7372/4976/3251/9567/2773/4507/8573/5471/8833/471/3615/4830/2079/191/5901	19
GO:0016079	BP	GO:0016079	synaptic vesicle exocytosis	19/1773	104/18862	0.00355979	0.0187281	0.0138637	1020/23413/22930/5868/63908/28964/112755/80331/6616/6857/8618/10059/2932/6812/1488/8775/488/801/808	19
GO:0042542	BP	GO:0042542	response to hydrogen peroxide	23/1773	135/18862	0.0036325	0.0190746	0.0141203	388/10013/7337/2876/847/824/6648/1398/5536/10131/301/6647/10935/2775/328/3066/7295/5111/10399/6188/11315/3939/1938	23
GO:0045637	BP	GO:0045637	regulation of myeloid cell differentiation	38/1773	258/18862	0.0036326	0.0190746	0.0141203	11143/60682/2551/79577/54623/3065/57095/8451/80349/25942/3692/84293/2778/22985/6422/3149/4830/3276/3313/3148/5591/3303/3304/3146/8294/8359/8360/8361/8362/8363/8364/8365/8366/8367/8368/8370/121504/554313	38
GO:2001021	BP	GO:2001021	negative regulation of response to DNA damage stimulus	16/1773	82/18862	0.00366874	0.019246	0.0142472	84309/9320/23347/5716/23028/1191/4282/55031/56893/7178/57805/55611/7158/7919/8091/6188	16
GO:0035065	BP	GO:0035065	regulation of histone acetylation	12/1773	54/18862	0.00375641	0.0196684	0.0145599	408/11143/10269/55677/4089/84656/25942/6598/1487/10856/6418/11315	12
GO:0072698	BP	GO:0072698	protein localization to microtubule cytoskeleton	12/1773	54/18862	0.00375641	0.0196684	0.0145599	1729/283489/22924/23636/4130/10982/2932/55968/22919/10540/4926/3192	12
GO:0006473	BP	GO:0006473	protein acetylation	31/1773	200/18862	0.00379256	0.0198389	0.014686	408/11143/9329/10269/8295/55677/84681/55226/80218/53615/54386/8473/8260/7917/4204/4089/84656/25942/80155/6598/79969/2932/8520/1487/86/8607/4137/10856/3066/6418/11315	31
GO:0042278	BP	GO:0042278	purine nucleoside metabolic process	13/1773	61/18862	0.00384395	0.0200505	0.0148427	79631/4860/4976/3251/9567/2773/4507/8573/8833/3615/4830/191/5901	13
GO:0046686	BP	GO:0046686	response to cadmium ion	13/1773	61/18862	0.00384395	0.0200505	0.0148427	1841/1528/207/847/4521/6648/6652/2937/5536/2805/5594/6647/5111	13
GO:0090181	BP	GO:0090181	regulation of cholesterol metabolic process	13/1773	61/18862	0.00384395	0.0200505	0.0148427	4597/1717/1595/4047/10654/11160/2222/3422/2224/6647/3837/2194/5901	13
GO:0009068	BP	GO:0009068	aspartate family amino acid catabolic process	7/1773	23/18862	0.00406742	0.0210962	0.0156168	1743/4967/1738/2805/80150/2806/501	7
GO:0016973	BP	GO:0016973	poly(A)+ mRNA export from nucleus	7/1773	23/18862	0.00406742	0.0210962	0.0156168	55677/55746/57187/10482/84271/9688/84324	7
GO:0019400	BP	GO:0019400	alditol metabolic process	7/1773	23/18862	0.00406742	0.0210962	0.0156168	26007/2584/6652/2805/2820/231/7167	7
GO:0043162	BP	GO:0043162	ubiquitin-dependent protein catabolic process via the multivesicular body sorting pathway	7/1773	23/18862	0.00406742	0.0210962	0.0156168	89853/8027/10013/25930/7251/9373/51160	7
GO:0051457	BP	GO:0051457	maintenance of protein location in nucleus	7/1773	23/18862	0.00406742	0.0210962	0.0156168	1020/25777/5905/6500/7295/11315/3192	7
GO:1901984	BP	GO:1901984	negative regulation of protein acetylation	7/1773	23/18862	0.00406742	0.0210962	0.0156168	84681/25942/2932/1487/3066/6418/11315	7
GO:0008543	BP	GO:0008543	fibroblast growth factor receptor signaling pathway	20/1773	113/18862	0.00412899	0.0213953	0.0158382	867/5434/5432/5430/2885/2962/7072/5437/4686/5781/5431/51552/5594/1399/3185/2817/5725/3178/3187/4670	20
GO:0006921	BP	GO:0006921	cellular component disassembly involved in execution phase of apoptosis	9/1773	35/18862	0.00415442	0.0214408	0.0158719	1676/581/3836/7153/22985/3005/3837/3148/3146	9
GO:0035774	BP	GO:0035774	positive regulation of insulin secretion involved in cellular response to glucose stimulus	9/1773	35/18862	0.00415442	0.0214408	0.0158719	7447/5532/4035/29085/6717/5019/5879/3799/8655	9
GO:0039694	BP	GO:0039694	viral RNA genome replication	9/1773	35/18862	0.00415442	0.0214408	0.0158719	5868/7153/6598/5094/5245/8091/7155/5093/10155	9
GO:0032092	BP	GO:0032092	positive regulation of protein binding	16/1773	83/18862	0.00415725	0.0214408	0.0158719	1020/57669/22924/4035/10211/5300/119/2035/2932/2280/5515/118/6135/22919/302/5901	16
GO:1901292	BP	GO:1901292	nucleoside phosphate catabolic process	16/1773	83/18862	0.00415725	0.0214408	0.0158719	131870/25939/4860/23098/11165/2876/3251/4521/1267/3094/79077/11164/38/1854/11332/7415	16
GO:0009755	BP	GO:0009755	hormone-mediated signaling pathway	30/1773	193/18862	0.00417183	0.0214959	0.0159126	10424/26060/23376/79876/10498/10013/7337/9667/55198/3065/5058/55915/5781/3301/1460/8289/23019/5536/51569/6597/11331/6422/5245/6294/1655/7533/142/11315/811/10521	30
GO:0044088	BP	GO:0044088	regulation of vacuole organization	11/1773	48/18862	0.00422741	0.0217619	0.0161096	51100/22930/5868/950/25782/29978/8396/81876/23256/9554/302	11
GO:0006294	BP	GO:0006294	nucleotide-excision repair, preincision complex assembly	8/1773	29/18862	0.0042558	0.0218263	0.0161573	8450/8451/6119/6118/6117/1642/142/6233	8
GO:0019048	BP	GO:0019048	modulation by virus of host process	8/1773	29/18862	0.0042558	0.0218263	0.0161573	5610/3839/3836/9217/3840/3838/11331/3837	8
GO:0051642	BP	GO:0051642	centrosome localization	8/1773	29/18862	0.0042558	0.0218263	0.0161573	10142/25777/4682/5362/1783/3799/23224/7430	8
GO:2000637	BP	GO:2000637	positive regulation of gene silencing by miRNA	8/1773	29/18862	0.0042558	0.0218263	0.0161573	5605/5604/8087/9698/1981/1656/1655/1660	8
GO:1901657	BP	GO:1901657	glycosyl compound metabolic process	22/1773	129/18862	0.00432965	0.0221844	0.0164224	79631/1841/4860/5636/7372/55347/4976/3251/9567/2773/4507/8573/5471/8833/471/3615/231/10327/4830/2079/191/5901	22
GO:0097485	BP	GO:0097485	neuron projection guidance	40/1773	278/18862	0.00438874	0.0224592	0.0166258	1020/5786/1948/7204/4756/23114/5362/23191/2909/4089/4897/2885/4035/1630/11313/3897/5781/64919/23654/4781/55740/5335/1947/5594/6152/682/5879/6712/3799/10570/2817/4684/2596/6711/7430/10381/56896/1400/1808/347733	40
GO:0099173	BP	GO:0099173	postsynapse organization	26/1773	161/18862	0.00439144	0.0224592	0.0166258	1020/26052/10013/7337/10243/23184/4976/382/10152/5764/378/10059/28988/2017/1399/10097/55737/87/6712/4076/375/2596/1627/1072/3312/71	26
GO:0001836	BP	GO:0001836	release of cytochrome c from mitochondria	12/1773	55/18862	0.00440216	0.0224931	0.0166509	51024/581/2876/4976/5716/92609/207/6648/79017/1191/10059/9141	12
GO:0002262	BP	GO:0002262	myeloid cell homeostasis	24/1773	145/18862	0.00440733	0.0224986	0.016655	11143/60682/23385/23376/79876/581/6229/2539/103/22985/6194/301/6647/6218/118/6223/3276/6208/3313/3148/5591/3303/3304/3146	24
GO:0043414	BP	GO:0043414	macromolecule methylation	43/1773	305/18862	0.00468974	0.0238533	0.0176578	54888/10269/1788/54623/55677/9589/10498/2931/23070/4839/22938/25940/53615/8731/546/8473/6830/80335/2091/4204/4089/23168/80349/2935/23028/2107/10419/6598/1786/23170/2778/5110/26097/283742/9219/6634/3028/9555/3276/142/51504/10155/3009	43
GO:0007549	BP	GO:0007549	dosage compensation	6/1773	18/18862	0.00470304	0.0238533	0.0176578	5394/23347/5976/55506/9555/3192	6
GO:0019054	BP	GO:0019054	modulation by virus of host cellular process	6/1773	18/18862	0.00470304	0.0238533	0.0176578	3839/3836/3840/3838/11331/3837	6
GO:0031468	BP	GO:0031468	nuclear envelope reassembly	6/1773	18/18862	0.00470304	0.0238533	0.0176578	7443/2010/5515/55968/8815/5518	6
GO:0032785	BP	GO:0032785	negative regulation of DNA-templated transcription, elongation	6/1773	18/18862	0.00470304	0.0238533	0.0176578	7469/25920/51497/6829/10915/3192	6
GO:0035020	BP	GO:0035020	regulation of Rac protein signal transduction	6/1773	18/18862	0.00470304	0.0238533	0.0176578	8473/199731/382/6993/1398/1785	6
GO:0045116	BP	GO:0045116	protein neddylation	6/1773	18/18862	0.00470304	0.0238533	0.0176578	54165/9039/8883/9040/6135/6125	6
GO:0043279	BP	GO:0043279	response to alkaloid	18/1773	99/18862	0.00472073	0.023921	0.0177079	1020/1788/84687/10972/18/7337/8682/63826/1785/5536/8683/9343/2946/2806/7384/2775/3066/3309	18
GO:0021987	BP	GO:0021987	cerebral cortex development	19/1773	107/18862	0.00491631	0.0247534	0.0183241	1020/25777/84687/23236/581/4035/1459/23028/1398/6513/2932/471/6434/1399/2618/5048/23224/57142/2316	19
GO:2001022	BP	GO:2001022	positive regulation of response to DNA damage stimulus	19/1773	107/18862	0.00491631	0.0247534	0.0183241	131870/57599/9513/23347/8087/9774/10097/57805/1655/7334/8091/5111/2521/142/6188/1660/5591/10155/3146	19
GO:0006553	BP	GO:0006553	lysine metabolic process	5/1773	13/18862	0.00492999	0.0247534	0.0183241	60496/1743/4967/1738/501	5
GO:0010635	BP	GO:0010635	regulation of mitochondrial fusion	5/1773	13/18862	0.00492999	0.0247534	0.0183241	7037/4976/10059/10493/10075	5
GO:0036109	BP	GO:0036109	alpha-linolenic acid metabolic process	5/1773	13/18862	0.00492999	0.0247534	0.0183241	51/30/9415/6342/3295	5
GO:0042921	BP	GO:0042921	glucocorticoid receptor signaling pathway	5/1773	13/18862	0.00492999	0.0247534	0.0183241	8289/5536/5245/7533/811	5
GO:0044090	BP	GO:0044090	positive regulation of vacuole organization	5/1773	13/18862	0.00492999	0.0247534	0.0183241	51100/22930/25782/8396/302	5
GO:0045837	BP	GO:0045837	negative regulation of membrane potential	5/1773	13/18862	0.00492999	0.0247534	0.0183241	23593/581/10550/5764/4137	5
GO:0099640	BP	GO:0099640	axo-dendritic protein transport	5/1773	13/18862	0.00492999	0.0247534	0.0183241	4130/3799/3315/6421/3192	5
GO:1904294	BP	GO:1904294	positive regulation of ERAD pathway	5/1773	13/18862	0.00492999	0.0247534	0.0183241	7917/10134/29978/29979/6449	5
GO:0050807	BP	GO:0050807	regulation of synapse organization	31/1773	204/18862	0.00510757	0.0256217	0.0189669	1020/56850/26052/10082/7337/23191/4976/375790/382/79012/10152/5764/378/1496/10059/28988/1981/10097/55737/387/4076/2823/2239/1639/55752/7415/1627/203068/1072/3312/7534	31
GO:0042306	BP	GO:0042306	regulation of protein import into nucleus	12/1773	56/18862	0.00513377	0.0257062	0.0190295	8882/57506/23636/10204/51569/5594/23435/7175/3843/5901/10155/2316	12
GO:0043388	BP	GO:0043388	positive regulation of DNA binding	12/1773	56/18862	0.00513377	0.0257062	0.0190295	3673/8721/3005/4830/7295/142/3148/11315/10155/801/808/3146	12
GO:0002433	BP	GO:0002433	immune response-regulating cell surface receptor signaling pathway involved in phagocytosis	23/1773	139/18862	0.00525593	0.0262701	0.0194469	7410/26060/10006/55198/63916/5058/23191/2885/10093/10094/10092/1398/26999/5335/10552/10109/5594/10787/10097/5879/10096/3320/71	23
GO:0038096	BP	GO:0038096	Fc-gamma receptor signaling pathway involved in phagocytosis	23/1773	139/18862	0.00525593	0.0262701	0.0194469	7410/26060/10006/55198/63916/5058/23191/2885/10093/10094/10092/1398/26999/5335/10552/10109/5594/10787/10097/5879/10096/3320/71	23
GO:0006309	BP	GO:0006309	apoptotic DNA fragmentation	7/1773	24/18862	0.00528328	0.0263112	0.0194773	1676/581/3836/3005/3837/3148/3146	7
GO:0006929	BP	GO:0006929	substrate-dependent cell migration	7/1773	24/18862	0.00528328	0.0263112	0.0194773	57669/6386/57698/3673/2017/2335/506	7
GO:0046039	BP	GO:0046039	GTP metabolic process	7/1773	24/18862	0.00528328	0.0263112	0.0194773	79631/4976/9567/2773/3615/4830/5901	7
GO:0051291	BP	GO:0051291	protein heterooligomerization	7/1773	24/18862	0.00528328	0.0263112	0.0194773	79869/6857/11052/10056/2193/11051/6240	7
GO:0001844	BP	GO:0001844	protein insertion into mitochondrial membrane involved in apoptotic signaling pathway	8/1773	30/18862	0.00533332	0.0264885	0.0196085	4836/581/7533/7529/7532/10971/7531/7534	8
GO:0036258	BP	GO:0036258	multivesicular body assembly	8/1773	30/18862	0.00533332	0.0264885	0.0196085	8027/7251/9798/9146/51510/51160/51534/10015	8
GO:0051125	BP	GO:0051125	regulation of actin nucleation	8/1773	30/18862	0.00533332	0.0264885	0.0196085	57175/23191/10152/2764/1496/11151/10787/375	8
GO:0099111	BP	GO:0099111	microtubule-based transport	29/1773	188/18862	0.00534744	0.0265347	0.0196427	25777/55860/51668/4130/55201/8943/4976/23011/26958/22820/140735/83658/3842/1781/10128/6647/3799/8655/403/4137/5048/23224/3315/6421/4133/1778/3192/4131/3312	29
GO:0007160	BP	GO:0007160	cell-matrix adhesion	34/1773	230/18862	0.00539571	0.026702	0.0197666	1020/5786/5921/57669/613/3611/10580/3685/7264/4035/10391/9748/23122/8573/3897/23332/7791/3673/2932/3688/2244/2017/2266/5879/87/6422/23603/8826/387/55920/23499/7414/2335/71	34
GO:0044242	BP	GO:0044242	cellular lipid catabolic process	34/1773	230/18862	0.00539571	0.026702	0.0197666	51/10455/30/3033/5825/1666/5096/6342/8879/5095/4035/207/11313/224/2109/3032/1891/1632/3295/10449/1892/2108/5335/1381/38/39/3028/3030/336/9588/3417/2171/335/2173	34
GO:2000116	BP	GO:2000116	regulation of cysteine-type endopeptidase activity	34/1773	230/18862	0.00539571	0.026702	0.0197666	408/51079/54205/444/64780/10016/51024/1718/581/56616/2876/207/10134/10550/3092/9131/10541/1457/55031/26999/9141/1509/10935/3336/4137/25824/5062/10399/6188/11315/7415/3329/3146/7531	34
GO:0097178	BP	GO:0097178	ruffle assembly	10/1773	43/18862	0.00560386	0.0277071	0.0205107	25940/83543/23191/382/28988/5962/5217/5879/23603/55920	10
GO:0038094	BP	GO:0038094	Fc-gamma receptor signaling pathway	23/1773	140/18862	0.00574435	0.0283763	0.021006	7410/26060/10006/55198/63916/5058/23191/2885/10093/10094/10092/1398/26999/5335/10552/10109/5594/10787/10097/5879/10096/3320/71	23
GO:0030522	BP	GO:0030522	intracellular receptor signaling pathway	39/1773	274/18862	0.0058357	0.0288017	0.0213209	26007/55666/23376/79876/10498/85364/10013/7337/9667/22938/3065/8805/5058/9698/3301/8289/23019/5536/51569/708/6597/1399/11331/1488/6422/5245/6294/1655/7334/7533/81/142/2171/11315/811/10521/3303/3304/6233	39
GO:0097006	BP	GO:0097006	regulation of plasma lipoprotein particle levels	18/1773	101/18862	0.00585648	0.0288783	0.0213776	10330/1175/3069/1211/183/1173/5567/160/161/336/163/375/5034/302/8570/335/1213/3190	18
GO:0007080	BP	GO:0007080	mitotic metaphase plate congression	11/1773	50/18862	0.00587456	0.0289416	0.0214245	283489/23636/9183/81929/27436/51510/8452/10726/10540/3837/3192	11
GO:0051310	BP	GO:0051310	metaphase plate congression	13/1773	64/18862	0.00590784	0.0290794	0.0215265	283489/23636/9183/81929/27436/51510/8452/10726/10540/3837/4926/1778/3192	13
GO:0034637	BP	GO:0034637	cellular carbohydrate biosynthetic process	16/1773	86/18862	0.0059506	0.0292638	0.021663	178/10580/2931/283209/207/9852/55276/5500/6513/2805/2932/7360/5499/5236/51477/231	16
GO:0030520	BP	GO:0030520	intracellular estrogen receptor signaling pathway	12/1773	57/18862	0.00595897	0.0292787	0.0216741	23376/79876/10498/5058/8289/23019/51569/11331/6294/1655/142/10521	12
GO:0098781	BP	GO:0098781	ncRNA transcription	19/1773	109/18862	0.00603745	0.0296379	0.0219399	2975/9329/9330/23248/5434/5432/5430/2962/5437/4686/55197/6598/4141/5431/6597/51593/55506/9555/4691	19
GO:0010737	BP	GO:0010737	protein kinase A signaling	9/1773	37/18862	0.00617076	0.0302384	0.0223844	9049/5577/5576/5573/4282/5567/5962/9590/7430	9
GO:0070897	BP	GO:0070897	transcription preinitiation complex assembly	9/1773	37/18862	0.00617076	0.0302384	0.0223844	6598/6597/7343/5704/5702/5706/5705/5701/3146	9
GO:0051303	BP	GO:0051303	establishment of chromosome localization	15/1773	79/18862	0.0062686	0.0306905	0.0227191	283489/23636/9183/81929/27436/51510/8452/10097/10726/10096/10540/3837/4926/1778/3192	15
GO:0006271	BP	GO:0006271	DNA strand elongation involved in DNA replication	6/1773	19/18862	0.00633444	0.0308755	0.0228561	3978/5984/3980/4176/5111/4172	6
GO:0045947	BP	GO:0045947	negative regulation of translational initiation	6/1773	19/18862	0.00633444	0.0308755	0.0228561	23367/5936/1965/3646/23521/7175	6
GO:0061003	BP	GO:0061003	positive regulation of dendritic spine morphogenesis	6/1773	19/18862	0.00633444	0.0308755	0.0228561	4976/10059/28988/10097/4076/1627	6
GO:0070584	BP	GO:0070584	mitochondrion morphogenesis	6/1773	19/18862	0.00633444	0.0308755	0.0228561	81892/51024/581/4976/10059/6742	6
GO:1901881	BP	GO:1901881	positive regulation of protein depolymerization	6/1773	19/18862	0.00633444	0.0308755	0.0228561	57482/1073/11034/9948/11075/10763	6
GO:0033673	BP	GO:0033673	negative regulation of kinase activity	38/1773	267/18862	0.00644919	0.031407	0.0232495	867/5770/23636/7251/2873/207/7453/26973/5577/5576/5573/5859/8396/103/3301/27250/183/2764/51637/5515/10527/10935/6422/23603/4137/5062/9555/3843/2950/3315/10399/7529/5518/11315/4869/7532/7345/3192	38
GO:0036503	BP	GO:0036503	ERAD pathway	18/1773	102/18862	0.00650266	0.0316394	0.0234216	55666/23197/201595/23190/7917/10134/29978/29979/10952/11160/9097/51035/6449/56886/5706/7415/7184/3309	18
GO:0036257	BP	GO:0036257	multivesicular body organization	8/1773	31/18862	0.00660705	0.0320906	0.0237556	8027/7251/9798/9146/51510/51160/51534/10015	8
GO:0044788	BP	GO:0044788	modulation by host of viral process	8/1773	31/18862	0.00660705	0.0320906	0.0237556	5091/64710/5702/5245/9218/5479/1072/3312	8
GO:0006066	BP	GO:0006066	alcohol metabolic process	50/1773	373/18862	0.00664498	0.0322055	0.0238407	26007/55750/84532/4597/1717/2584/50814/23236/1718/11165/10380/1595/4204/1719/2539/847/224/4047/6652/3069/3930/10654/11160/2222/2805/10449/1727/5335/3422/5860/2820/2224/39/6647/47/51477/336/231/10327/128/7276/3417/3837/3418/11315/2194/335/5901/7167/801	50
GO:0007019	BP	GO:0007019	microtubule depolymerization	10/1773	44/18862	0.00665413	0.0322055	0.0238407	10013/4130/55201/50810/23122/23332/9181/9793/11075/4131	10
GO:0007339	BP	GO:0007339	binding of sperm to zona pellucida	10/1773	44/18862	0.00665413	0.0322055	0.0238407	9898/7417/22948/10574/10575/6950/7203/10576/10694/226	10
GO:0045910	BP	GO:0045910	negative regulation of DNA recombination	10/1773	44/18862	0.00665413	0.0322055	0.0238407	54386/23347/3024/56893/4436/2956/3005/7158/8971/3009	10
GO:0090174	BP	GO:0090174	organelle membrane fusion	19/1773	110/18862	0.00667169	0.0322621	0.0238826	9482/4218/112755/2773/51479/6616/6857/8417/8396/23673/6812/11151/8615/9554/301/3799/7879/302/811	19
GO:0000244	BP	GO:0000244	spliceosomal tri-snRNP complex assembly	7/1773	25/18862	0.00675244	0.0325668	0.0241081	9129/26121/9733/57819/24148/10594/27339	7
GO:0007026	BP	GO:0007026	negative regulation of microtubule depolymerization	7/1773	25/18862	0.00675244	0.0325668	0.0241081	10013/50810/23122/23332/9181/11075/4131	7
GO:0051156	BP	GO:0051156	glucose 6-phosphate metabolic process	7/1773	25/18862	0.00675244	0.0325668	0.0241081	2539/55276/25796/6888/5226/7086/5223	7
GO:0071479	BP	GO:0071479	cellular response to ionizing radiation	13/1773	65/18862	0.00676442	0.032596	0.0241297	388/10269/2885/64710/23028/1785/6422/7158/1936/7520/8091/2547/3309	13
GO:0007265	BP	GO:0007265	Ras protein signal transduction	46/1773	338/18862	0.00683251	0.0328953	0.0243512	408/867/388/5921/55738/613/10672/23636/8473/23191/199731/10982/57698/2909/2885/10211/382/23011/392/23580/9181/10152/6993/1398/1786/9908/1785/10146/8452/5898/28988/55379/1104/5962/51495/10787/1399/5879/387/396/3837/11315/335/2664/10155/1072	46
GO:0072523	BP	GO:0072523	purine-containing compound catabolic process	11/1773	51/18862	0.00686814	0.0330379	0.0244568	131870/25939/4860/11165/2876/3251/4521/3094/38/11332/191	11
GO:1901617	BP	GO:1901617	organic hydroxy compound biosynthetic process	36/1773	251/18862	0.00696432	0.0334713	0.0247777	8566/55750/4597/26060/1717/50814/1718/1595/1652/6342/1719/2539/4047/3930/10654/11160/3295/2222/2805/10449/1727/3422/5860/2224/39/6647/3028/47/29968/51477/231/3837/11315/2194/335/5901	36
GO:0007411	BP	GO:0007411	axon guidance	39/1773	277/18862	0.00698807	0.0335561	0.0248405	1020/5786/1948/7204/4756/23114/5362/23191/2909/4089/4897/2885/4035/1630/11313/3897/5781/64919/23654/4781/55740/5335/1947/5594/6152/682/5879/6712/3799/2817/4684/2596/6711/7430/10381/56896/1400/1808/347733	39
GO:0007032	BP	GO:0007032	endosome organization	15/1773	80/18862	0.00706154	0.033829	0.0250425	23325/149371/8027/950/7251/5869/9798/9146/51510/51160/8724/51534/10015/23603/7879	15
GO:0009143	BP	GO:0009143	nucleoside triphosphate catabolic process	5/1773	14/18862	0.00708178	0.033829	0.0250425	131870/25939/4521/79077/1854	5
GO:0031958	BP	GO:0031958	corticosteroid receptor signaling pathway	5/1773	14/18862	0.00708178	0.033829	0.0250425	8289/5536/5245/7533/811	5
GO:0043650	BP	GO:0043650	dicarboxylic acid biosynthetic process	5/1773	14/18862	0.00708178	0.033829	0.0250425	8604/2805/2806/2746/4522	5
GO:0043922	BP	GO:0043922	negative regulation by host of viral transcription	5/1773	14/18862	0.00708178	0.033829	0.0250425	3065/64710/5702/23435/8091	5
GO:1903894	BP	GO:1903894	regulation of IRE1-mediated unfolded protein response	5/1773	14/18862	0.00708178	0.033829	0.0250425	5770/23376/581/10987/3309	5
GO:0051047	BP	GO:0051047	positive regulation of secretion	41/1773	295/18862	0.0072192	0.0344555	0.0255063	1020/23413/84932/22930/7447/5532/5868/10972/8027/25930/6386/399687/7251/112755/4089/4035/23122/382/6857/23332/164/9146/5781/8618/10059/9255/6812/29085/2244/6717/23435/10015/5019/2266/5879/3799/8655/7879/2746/375/7430	41
GO:0007568	BP	GO:0007568	aging	42/1773	304/18862	0.00731636	0.034889	0.0258271	10269/1788/84687/10498/2931/53615/23636/5604/493856/4976/3485/8301/26156/2885/4035/207/847/25942/4521/63826/6648/2937/1965/1267/27250/9361/1738/4282/5594/4436/27101/6647/6185/2956/2775/328/8091/1495/811/5591/4869/1938	42
GO:0021766	BP	GO:0021766	hippocampus development	14/1773	73/18862	0.00741822	0.0353176	0.0261444	1020/8891/27089/84687/3065/22803/1398/55236/79969/2932/1399/3799/4830/5048	14
GO:0006298	BP	GO:0006298	mismatch repair	9/1773	38/18862	0.00742548	0.0353176	0.0261444	3978/5424/6119/4436/6118/2956/6117/5111/3146	9
GO:0032885	BP	GO:0032885	regulation of polysaccharide biosynthetic process	9/1773	38/18862	0.00742548	0.0353176	0.0261444	10580/2931/207/9852/5500/2932/160/5499/1213	9
GO:0008286	BP	GO:0008286	insulin receptor signaling pathway	23/1773	143/18862	0.00743921	0.0353523	0.0261701	5786/51382/26060/5770/9114/10580/528/2931/51606/8473/5058/4976/2885/207/529/6599/57727/64710/5781/8396/2932/523/526	23
GO:1904950	BP	GO:1904950	negative regulation of establishment of protein localization	21/1773	127/18862	0.00748925	0.0355558	0.0263208	1020/7447/4345/29934/1595/10391/5781/3301/5905/51569/8724/10434/10961/301/6422/5211/4137/7295/3418/11315/2664	21
GO:0071383	BP	GO:0071383	cellular response to steroid hormone stimulus	30/1773	201/18862	0.00749496	0.0355558	0.0263208	10424/23376/79876/10498/10013/7337/9667/3065/5058/7332/3301/8289/23019/5536/51569/6597/301/11331/6422/5245/6294/1655/11335/2950/7533/142/11315/811/10521/3192	30
GO:0006633	BP	GO:0006633	fatty acid biosynthetic process	26/1773	168/18862	0.00771276	0.0365442	0.0270524	79966/5571/84532/5825/9415/4706/2879/2944/51144/9524/3692/9444/11160/4048/4282/873/51495/10728/301/2946/47/11332/2950/2171/2194/335	26
GO:0034332	BP	GO:0034332	adherens junction organization	13/1773	66/18862	0.00771659	0.0365442	0.0270524	8642/57863/25930/23705/7082/6904/5962/1500/4301/118/5062/7414/1495	13
GO:0032091	BP	GO:0032091	negative regulation of protein binding	17/1773	96/18862	0.00775869	0.036649	0.02713	57669/581/8189/2962/207/5300/5792/23028/2932/5499/10856/488/10399/11315/4133/1400/10763	17
GO:0048010	BP	GO:0048010	vascular endothelial growth factor receptor signaling pathway	17/1773	96/18862	0.00775869	0.036649	0.02713	7410/10006/5770/10016/3685/63916/23191/199731/9146/1398/26999/10787/5879/387/5062/3315/3320	17
GO:1901184	BP	GO:1901184	regulation of ERBB signaling pathway	17/1773	96/18862	0.00775869	0.036649	0.02713	867/89853/6456/5782/29924/8027/23636/7251/2885/207/3092/9146/55704/58513/183/7879/57142	17
GO:0031057	BP	GO:0031057	negative regulation of histone modification	10/1773	45/18862	0.00785077	0.0370204	0.0274049	9320/6830/25942/23028/6598/1786/1487/55611/9555/6418	10
GO:0032881	BP	GO:0032881	regulation of polysaccharide metabolic process	10/1773	45/18862	0.00785077	0.0370204	0.0274049	10580/2931/207/9852/5500/2932/160/5499/1213/3146	10
GO:0006475	BP	GO:0006475	internal protein amino acid acetylation	25/1773	160/18862	0.00786041	0.0370341	0.0274151	408/11143/9329/10269/8295/55677/80218/53615/8473/8260/7917/4204/4089/84656/25942/6598/79969/8520/1487/86/8607/4137/10856/6418/11315	25
GO:0098930	BP	GO:0098930	axonal transport	12/1773	59/18862	0.0079223	0.0372472	0.0275728	55860/4130/8943/4976/23011/6647/3799/4137/5048/3315/4133/1778	12
GO:0021954	BP	GO:0021954	central nervous system neuron development	15/1773	81/18862	0.0079327	0.0372472	0.0275728	1020/55681/27089/2909/113246/3251/1630/1398/4781/9201/1399/4137/5048/3320/4133	15
GO:0050000	BP	GO:0050000	chromosome localization	15/1773	81/18862	0.0079327	0.0372472	0.0275728	283489/23636/9183/81929/27436/51510/8452/10097/10726/10096/10540/3837/4926/1778/3192	15
GO:0072384	BP	GO:0072384	organelle transport along microtubule	15/1773	81/18862	0.0079327	0.0372472	0.0275728	25777/55860/55201/8943/4976/26958/22820/10128/3799/4137/5048/23224/4133/1778/4131	15
GO:0030038	BP	GO:0030038	contractile actin filament bundle assembly	18/1773	104/18862	0.0079686	0.037352	0.0276504	408/10580/5058/10391/23122/23332/55704/7791/8452/9124/7082/5217/5879/6422/387/5062/335/71	18
GO:0043149	BP	GO:0043149	stress fiber assembly	18/1773	104/18862	0.0079686	0.037352	0.0276504	408/10580/5058/10391/23122/23332/55704/7791/8452/9124/7082/5217/5879/6422/387/5062/335/71	18
GO:0032259	BP	GO:0032259	methylation	48/1773	359/18862	0.00807788	0.037832	0.0280057	1312/54888/10269/1788/54623/9446/55677/9589/10498/2931/23070/4839/22938/25940/53615/8731/546/8473/6830/80335/2091/4204/4089/23168/8623/80349/2935/23028/2107/10419/6598/1786/23170/2778/5110/27430/26097/283742/9219/6634/3028/9555/191/3276/142/51504/10155/3009	48
GO:1903955	BP	GO:1903955	positive regulation of protein targeting to mitochondrion	8/1773	32/18862	0.00809809	0.0378944	0.0280519	51100/2931/1459/7332/9141/10055/10075/9520	8
GO:0042058	BP	GO:0042058	regulation of epidermal growth factor receptor signaling pathway	16/1773	89/18862	0.00832326	0.0387994	0.0287219	867/89853/6456/5782/29924/8027/23636/7251/2885/207/3092/9146/55704/58513/183/7879	16
GO:0006607	BP	GO:0006607	NLS-bearing protein import into nucleus	6/1773	20/18862	0.00834085	0.0387994	0.0287219	3839/3836/3840/3838/3843/3837	6
GO:0009083	BP	GO:0009083	branched-chain amino acid catabolic process	6/1773	20/18862	0.00834085	0.0387994	0.0287219	586/26275/4329/1738/38/3028	6
GO:0010310	BP	GO:0010310	regulation of hydrogen peroxide metabolic process	6/1773	20/18862	0.00834085	0.0387994	0.0287219	10013/6648/4513/23530/5879/7001	6
GO:0045056	BP	GO:0045056	transcytosis	6/1773	20/18862	0.00834085	0.0387994	0.0287219	5868/8301/4035/8615/55737/1213	6
GO:0046823	BP	GO:0046823	negative regulation of nucleocytoplasmic transport	6/1773	20/18862	0.00834085	0.0387994	0.0287219	1020/5905/51569/7175/7295/11315	6
GO:0051570	BP	GO:0051570	regulation of histone H3-K9 methylation	6/1773	20/18862	0.00834085	0.0387994	0.0287219	546/4204/23028/6598/1786/3009	6
GO:0005977	BP	GO:0005977	glycogen metabolic process	14/1773	74/18862	0.00837803	0.0389394	0.0288255	178/10580/2931/283209/207/9852/55276/5500/2932/7360/5499/5236/801/3146	14
GO:0036475	BP	GO:0036475	neuron death in response to oxidative stress	7/1773	26/18862	0.00850432	0.0393602	0.029137	57465/10550/10314/10399/142/11315/4841	7
GO:0051560	BP	GO:0051560	mitochondrial calcium ion homeostasis	7/1773	26/18862	0.00850432	0.0393602	0.029137	51024/10134/10939/5910/3954/10989/309	7
GO:0060314	BP	GO:0060314	regulation of ryanodine-sensitive calcium-release channel activity	7/1773	26/18862	0.00850432	0.0393602	0.029137	9446/6717/2280/2946/801/805/808	7
GO:1900739	BP	GO:1900739	regulation of protein insertion into mitochondrial membrane involved in apoptotic signaling pathway	7/1773	26/18862	0.00850432	0.0393602	0.029137	4836/7533/7529/7532/10971/7531/7534	7
GO:1900740	BP	GO:1900740	positive regulation of protein insertion into mitochondrial membrane involved in apoptotic signaling pathway	7/1773	26/18862	0.00850432	0.0393602	0.029137	4836/7533/7529/7532/10971/7531/7534	7
GO:0007034	BP	GO:0007034	vacuolar transport	24/1773	153/18862	0.00865261	0.0399793	0.0295953	388/55681/9482/9114/8027/8943/950/81609/7251/4035/51479/164/9146/51510/1191/51160/5660/51534/55737/7879/375/7415/3303/3312	24
GO:0044409	BP	GO:0044409	entry into host	24/1773	153/18862	0.00865261	0.0399793	0.0295953	975/867/23265/1948/55770/3685/950/7037/2885/3839/6993/1525/8724/3673/3688/682/1500/5245/5034/3956/3921/4684/3303/3304	24
GO:1904377	BP	GO:1904377	positive regulation of protein localization to cell periphery	13/1773	67/18862	0.00877137	0.040494	0.0299763	10580/84687/4035/207/382/2037/2035/3688/3799/10399/6711/4926/7430	13
GO:0002431	BP	GO:0002431	Fc receptor mediated stimulatory signaling pathway	23/1773	145/18862	0.0087815	0.0405068	0.0299858	7410/26060/10006/55198/63916/5058/23191/2885/10093/10094/10092/1398/26999/5335/10552/10109/5594/10787/10097/5879/10096/3320/71	23
GO:0035601	BP	GO:0035601	protein deacylation	18/1773	105/18862	0.00879543	0.040537	0.0300082	283248/10013/3065/55347/25942/79718/11313/9112/1487/10434/9219/57805/5245/4137/10432/3066/6421/2316	18
GO:0045292	BP	GO:0045292	mRNA cis splicing, via spliceosome	9/1773	39/18862	0.00886585	0.0407592	0.0301727	28960/51729/6631/4686/9092/9416/11168/23020/6426	9
GO:1903170	BP	GO:1903170	negative regulation of calcium ion transmembrane transport	9/1773	39/18862	0.00886585	0.0407592	0.0301727	9446/29979/6717/2946/7416/801/805/808/7531	9
GO:2000785	BP	GO:2000785	regulation of autophagosome assembly	9/1773	39/18862	0.00886585	0.0407592	0.0301727	51100/22930/5868/25782/29978/8396/81876/23256/9554	9
GO:0097061	BP	GO:0097061	dendritic spine organization	15/1773	82/18862	0.00888732	0.0408238	0.0302205	1020/26052/10013/7337/4976/10152/10059/28988/2017/10097/55737/4076/375/1627/1072	15
GO:0032606	BP	GO:0032606	type I interferon production	21/1773	129/18862	0.00893761	0.0410206	0.0303661	5434/55666/57506/85364/5495/5437/4361/10211/5300/5781/10146/9868/5094/7520/3148/2547/3320/1660/5591/3329/3146	21
GO:0060271	BP	GO:0060271	cilium assembly	51/1773	388/18862	0.0089513	0.0410492	0.0303873	51382/10142/95681/9114/10013/25930/4218/51668/57216/7283/2909/11258/5577/54874/23332/55704/23157/1785/6738/140735/79969/83658/3842/7419/10382/1781/9793/25814/10097/8655/403/10096/10121/10801/1641/22919/10540/5048/1639/4735/23224/4134/989/5518/3320/7532/1778/2316/203068/10383/7531	51
GO:0060997	BP	GO:0060997	dendritic spine morphogenesis	12/1773	60/18862	0.00907708	0.0415222	0.0307375	1020/26052/10013/7337/4976/10152/10059/28988/10097/4076/1627/1072	12
GO:0060998	BP	GO:0060998	regulation of dendritic spine development	12/1773	60/18862	0.00907708	0.0415222	0.0307375	26052/7337/4976/382/1982/10059/28988/10097/3066/4076/375/1627	12
GO:0099072	BP	GO:0099072	regulation of postsynaptic membrane neurotransmitter receptor levels	12/1773	60/18862	0.00907708	0.0415222	0.0307375	56850/26052/10082/4218/10243/112755/6616/1785/1500/163/2239/7531	12
GO:0009743	BP	GO:0009743	response to carbohydrate	32/1773	221/18862	0.00917061	0.0419152	0.0310284	8891/11143/8893/7447/4704/5532/23098/4976/1967/4035/847/25942/6648/6598/2805/3673/6597/29085/6717/6434/5019/5879/3799/8655/5211/336/4830/2950/3956/10399/3939/4131	32
GO:0006195	BP	GO:0006195	purine nucleotide catabolic process	10/1773	46/18862	0.00920643	0.0420091	0.0310979	131870/25939/4860/11165/2876/3251/4521/3094/38/11332	10
GO:0090382	BP	GO:0090382	phagosome maturation	10/1773	46/18862	0.00920643	0.0420091	0.0310979	51382/9114/528/51606/529/11151/523/526/51552/7879	10
GO:0000731	BP	GO:0000731	DNA synthesis involved in DNA repair	11/1773	53/18862	0.00924521	0.0421162	0.0311772	55666/5984/5982/5424/9100/6119/6118/6117/5111/7415/6233	11
GO:1901185	BP	GO:1901185	negative regulation of ERBB signaling pathway	11/1773	53/18862	0.00924521	0.0421162	0.0311772	867/6456/5782/29924/8027/23636/7251/2885/9146/58513/7879	11
GO:0006073	BP	GO:0006073	cellular glucan metabolic process	14/1773	75/18862	0.00943336	0.0429023	0.0317591	178/10580/2931/283209/207/9852/55276/5500/2932/7360/5499/5236/801/3146	14
GO:0044042	BP	GO:0044042	glucan metabolic process	14/1773	75/18862	0.00943336	0.0429023	0.0317591	178/10580/2931/283209/207/9852/55276/5500/2932/7360/5499/5236/801/3146	14
GO:0034284	BP	GO:0034284	response to monosaccharide	29/1773	196/18862	0.00951067	0.0432182	0.031993	8891/8893/7447/4704/5532/23098/4976/1967/4035/847/25942/6648/6598/3673/6597/29085/6717/6434/5019/5879/3799/8655/5211/336/4830/2950/3956/10399/3939	29
GO:0021761	BP	GO:0021761	limbic system development	17/1773	98/18862	0.00952528	0.0432489	0.0320157	1020/8891/22930/27089/84687/3065/581/22803/10092/1398/55236/79969/2932/1399/3799/4830/5048	17
GO:0006000	BP	GO:0006000	fructose metabolic process	5/1773	15/18862	0.00981171	0.0441485	0.0326817	26007/6652/230/231/226	5
GO:0006266	BP	GO:0006266	DNA ligation	5/1773	15/18862	0.00981171	0.0441485	0.0326817	3978/3980/7153/2547/3146	5
GO:0015936	BP	GO:0015936	coenzyme A metabolic process	5/1773	15/18862	0.00981171	0.0441485	0.0326817	79877/55229/38/47/11332	5
GO:0033540	BP	GO:0033540	fatty acid beta-oxidation using acyl-CoA oxidase	5/1773	15/18862	0.00981171	0.0441485	0.0326817	51/10455/30/6342/3295	5
GO:0042559	BP	GO:0042559	pteridine-containing compound biosynthetic process	5/1773	15/18862	0.00981171	0.0441485	0.0326817	1719/5860/471/2618/4522	5
GO:0043558	BP	GO:0043558	regulation of translational initiation in response to stress	5/1773	15/18862	0.00981171	0.0441485	0.0326817	5610/10959/1965/5499/4869	5
GO:0048308	BP	GO:0048308	organelle inheritance	5/1773	15/18862	0.00981171	0.0441485	0.0326817	5605/5604/7443/5594/7534	5
GO:0048313	BP	GO:0048313	Golgi inheritance	5/1773	15/18862	0.00981171	0.0441485	0.0326817	5605/5604/7443/5594/7534	5
GO:1900242	BP	GO:1900242	regulation of synaptic vesicle endocytosis	5/1773	15/18862	0.00981171	0.0441485	0.0326817	5532/10059/6455/801/808	5
GO:2001224	BP	GO:2001224	positive regulation of neuron migration	5/1773	15/18862	0.00981171	0.0441485	0.0326817	57698/9373/9181/4192/2316	5
GO:0032728	BP	GO:0032728	positive regulation of interferon-beta production	8/1773	33/18862	0.00982772	0.0441485	0.0326817	57506/10211/5781/9868/3148/3320/1660/3146	8
GO:0051973	BP	GO:0051973	positive regulation of telomerase activity	8/1773	33/18862	0.00982772	0.0441485	0.0326817	1736/5594/10728/7520/10575/6950/10576/3320	8
GO:1901020	BP	GO:1901020	negative regulation of calcium ion transmembrane transporter activity	8/1773	33/18862	0.00982772	0.0441485	0.0326817	9446/29979/6717/2946/801/805/808/7531	8
GO:0045069	BP	GO:0045069	regulation of viral genome replication	15/1773	83/18862	0.00993072	0.0445258	0.0329609	5586/57506/5610/6780/23367/7153/9217/103/51495/8815/1642/8091/7155/3609/10155	15
GO:0051262	BP	GO:0051262	protein tetramerization	15/1773	83/18862	0.00993072	0.0445258	0.0329609	25939/79869/55198/1429/3251/6648/11052/10056/2193/11051/223/6472/6240/3028/226	15
GO:0043967	BP	GO:0043967	histone H4 acetylation	13/1773	68/18862	0.00993597	0.0445258	0.0329609	408/11143/10269/8295/55677/80218/8473/6598/8520/1487/86/8607/10856	13
GO:0016311	BP	GO:0016311	dephosphorylation	62/1773	491/18862	0.0101268	0.045344	0.0335666	131870/64943/5786/84064/58497/5782/54205/5537/5770/5532/5524/84309/84687/5531/58478/25930/10380/261726/134510/5610/51400/80895/5495/92609/10160/5529/6305/64062/8189/55291/55631/5300/151987/5792/5510/55197/4659/5781/26472/5500/5764/5536/52/3673/2932/2029/29085/5496/2280/5515/5499/328/5803/6418/5725/7529/5518/7184/801/805/808/7531	62
GO:0009133	BP	GO:0009133	nucleoside diphosphate biosynthetic process	4/1773	10/18862	0.0102778	0.0456853	0.0338193	1841/51727/204/203	4
GO:0009396	BP	GO:0009396	folic acid-containing compound biosynthetic process	4/1773	10/18862	0.0102778	0.0456853	0.0338193	1719/471/2618/4522	4
GO:0015937	BP	GO:0015937	coenzyme A biosynthetic process	4/1773	10/18862	0.0102778	0.0456853	0.0338193	79877/55229/38/11332	4
GO:0030953	BP	GO:0030953	astral microtubule organization	4/1773	10/18862	0.0102778	0.0456853	0.0338193	23332/3837/4926/7430	4
GO:0031340	BP	GO:0031340	positive regulation of vesicle fusion	4/1773	10/18862	0.0102778	0.0456853	0.0338193	6857/301/3799/302	4
GO:0044351	BP	GO:0044351	macropinocytosis	4/1773	10/18862	0.0102778	0.0456853	0.0338193	26060/55198/112755/1785	4
GO:0046487	BP	GO:0046487	glyoxylate metabolic process	4/1773	10/18862	0.0102778	0.0456853	0.0338193	9380/2806/3417/3418	4
GO:1901838	BP	GO:1901838	positive regulation of transcription of nucleolar large rRNA by RNA polymerase I	4/1773	10/18862	0.0102778	0.0456853	0.0338193	6598/4141/6597/4691	4
GO:1904526	BP	GO:1904526	regulation of microtubule binding	4/1773	10/18862	0.0102778	0.0456853	0.0338193	22924/5515/22919/4133	4
GO:0042147	BP	GO:0042147	retrograde transport, endosome to Golgi	16/1773	91/18862	0.0102863	0.0456863	0.03382	10652/112936/29934/63893/6643/9559/9043/51479/51699/23085/8724/7874/55737/7879/1639/1213	16
GO:0030902	BP	GO:0030902	hindbrain development	22/1773	139/18862	0.0104785	0.0465027	0.0344243	1020/23385/27089/5362/5058/5604/4204/1272/5781/1398/5764/1496/136319/471/1399/2618/6712/58155/3184/3309/2316/1152	22
GO:0010882	BP	GO:0010882	regulation of cardiac muscle contraction by calcium ion signaling	7/1773	27/18862	0.0105682	0.0468253	0.0346632	9446/481/2946/488/801/805/808	7
GO:0035459	BP	GO:0035459	vesicle cargo loading	7/1773	27/18862	0.0105682	0.0468253	0.0346632	10972/8301/10959/9632/22872/6396/10484	7
GO:0006275	BP	GO:0006275	regulation of DNA replication	18/1773	107/18862	0.0106551	0.0471721	0.0349199	11143/10269/57418/546/5984/5982/3980/23244/64710/55704/30968/5515/5879/27101/9126/5111/5518/1660	18
GO:0007173	BP	GO:0007173	epidermal growth factor receptor signaling pathway	20/1773	123/18862	0.0106832	0.0472586	0.0349839	867/89853/6456/5782/29924/8027/23636/7251/2885/207/3092/9146/5781/55704/58513/183/378/5335/8826/7879	20
GO:0051972	BP	GO:0051972	regulation of telomerase activity	10/1773	47/18862	0.0107339	0.0474306	0.0351113	1736/5594/10728/7520/10575/6950/3184/10576/3320/3181	10
GO:0008090	BP	GO:0008090	retrograde axonal transport	6/1773	21/18862	0.0107652	0.0474306	0.0351113	55860/4130/6647/3799/5048/1778	6
GO:0009067	BP	GO:0009067	aspartate family amino acid biosynthetic process	6/1773	21/18862	0.0107652	0.0474306	0.0351113	60496/58478/4507/2805/2806/4522	6
GO:1902307	BP	GO:1902307	positive regulation of sodium ion transmembrane transport	6/1773	21/18862	0.0107652	0.0474306	0.0351113	481/483/1785/3799/375/81	6
GO:2000765	BP	GO:2000765	regulation of cytoplasmic translation	6/1773	21/18862	0.0107652	0.0474306	0.0351113	51441/23521/7555/1660/1938/5315	6
GO:0051051	BP	GO:0051051	negative regulation of transport	56/1773	438/18862	0.0110498	0.0486458	0.0360108	1020/7447/26060/51024/3685/9446/2931/4345/6386/55198/29934/1595/23191/112755/8301/207/382/8682/10550/392/29978/29979/5781/9943/5905/51569/8724/11151/10434/10961/23327/6717/301/55737/5879/2946/6422/7175/5211/2775/7879/336/7416/7295/10399/3418/2171/11315/2664/10971/801/805/808/3146/7531/4131	56
GO:0006694	BP	GO:0006694	steroid biosynthetic process	28/1773	190/18862	0.011261	0.0495356	0.0366695	4597/1717/84681/50814/1718/1595/6342/2539/51144/4047/3930/10654/11160/3295/2222/10449/1727/3422/2224/39/6647/3028/47/231/3837/2194/335/5901	28
GO:0005925	CC	GO:0005925	focal adhesion	165/1791	416/19520	1.33039e-64	9.0999e-62	4.78942e-62	975/867/5786/388/6251/58497/6169/5782/57669/1948/23385/23164/5605/57175/3611/10580/3685/2319/23114/10672/6386/823/83543/5058/950/2314/5604/28964/23191/10982/4035/10391/1465/847/824/10211/5756/23122/382/51056/23011/10094/6168/8573/5576/3897/23332/2037/83660/4659/9181/10092/7791/6209/1785/5500/10146/6128/6141/9124/10890/6160/79969/6143/55740/5898/51164/3673/3688/3339/1466/6730/5962/23521/2017/51495…	165
GO:0030055	CC	GO:0030055	cell-substrate junction	165/1791	423/19520	2.35798e-63	8.0643e-61	4.24437e-61	975/867/5786/388/6251/58497/6169/5782/57669/1948/23385/23164/5605/57175/3611/10580/3685/2319/23114/10672/6386/823/83543/5058/950/2314/5604/28964/23191/10982/4035/10391/1465/847/824/10211/5756/23122/382/51056/23011/10094/6168/8573/5576/3897/23332/2037/83660/4659/9181/10092/7791/6209/1785/5500/10146/6128/6141/9124/10890/6160/79969/6143/55740/5898/51164/3673/3688/3339/1466/6730/5962/23521/2017/51495…	165
GO:0005681	CC	GO:0005681	spliceosomal complex	92/1791	191/19520	8.41602e-45	1.91885e-42	1.00992e-42	55692/8896/51340/9129/23398/22938/26121/10286/10250/6635/51729/27336/53938/11157/84844/9128/6631/6009/5356/51747/5411/6637/84991/6627/9092/10285/8175/10713/1153/23517/9416/51639/6636/51691/6638/103/83443/9939/5976/27258/7307/102724594/51645/9410/25804/55234/6629/4809/6626/50804/57819/988/51631/8539/6625/7536/6434/23524/10946/6634/6632/9343/10291/11338/10189/22913/3185/58155/10992/1655/9775/24148/…	92
GO:0022626	CC	GO:0022626	cytosolic ribosome	67/1791	107/19520	1.06775e-42	1.82586e-40	9.60977e-41	6169/28985/9513/6138/11224/6229/6164/6168/6157/6144/6209/9045/6137/6128/6141/6160/6143/6234/6232/6210/6165/6230/23521/6158/6139/6228/6224/6204/6194/6134/6152/6217/6203/6142/6231/6155/6201/6227/4736/6218/6156/6135/6193/6222/6207/6133/6189/6147/6206/6122/6132/6202/9349/6205/6136/6223/6129/6124/6125/6187/6208/6130/6175/3921/6181/6188/6233	67
GO:0071013	CC	GO:0071013	catalytic step 2 spliceosome	56/1791	87/19520	7.69284e-37	1.05238e-34	5.53884e-35	8896/51340/23398/22938/10286/10250/6635/53938/5356/5411/6637/6627/9092/8175/23517/9416/51639/6636/6638/9939/27258/7307/51645/9410/6629/57819/988/23524/10946/6634/6632/9343/10291/10189/22913/3185/10992/1655/9775/24148/10594/23020/6633/23450/27339/23451/10492/6426/10236/3178/220988/3187/4670/3192/3190/3181	56
GO:0000502	CC	GO:0000502	proteasome complex	45/1791	62/19520	1.94526e-33	2.21759e-31	1.16715e-31	11047/7337/5711/5721/5683/5714/5713/5716/10197/5690/29979/9491/5720/10213/5710/5695/9097/5684/5704/5702/56893/9861/5694/5706/5718/5691/5700/5692/5709/5705/5685/5719/5689/5686/9352/5707/5682/5717/5688/5693/5687/5708/5701/3315/7415	45
GO:1904813	CC	GO:1904813	ficolin-1-rich granule lumen	63/1791	124/19520	9.09287e-33	8.88504e-31	4.67633e-31	178/55860/4860/1508/5683/823/5713/847/2495/10120/10213/10092/55276/6993/327/5049/4048/1460/5695/4282/11333/28988/23406/230/5702/6727/9861/5718/5709/5594/5719/1509/1476/5689/5686/10097/5717/5236/10549/47/5211/5708/3615/5701/10075/7414/2950/3417/3837/3608/5223/2547/7415/3320/10694/226/1938/3303/3304/3146/5315/1915/3312	63
GO:1905369	CC	GO:1905369	endopeptidase complex	45/1791	68/19520	1.21594e-30	1.03963e-28	5.47172e-29	11047/7337/5711/5721/5683/5714/5713/5716/10197/5690/29979/9491/5720/10213/5710/5695/9097/5684/5704/5702/56893/9861/5694/5706/5718/5691/5700/5692/5709/5705/5685/5719/5689/5686/9352/5707/5682/5717/5688/5693/5687/5708/5701/3315/7415	45
GO:0098687	CC	GO:0098687	chromosomal region	106/1791	345/19520	3.16255e-30	2.40354e-28	1.26502e-28	115426/11143/25909/23279/1788/79577/25777/55651/283489/55226/348995/134492/9183/55746/54386/81929/546/79902/57187/80335/23347/10428/4361/25942/11258/5424/23122/64151/23244/84295/23332/9031/4659/51143/9918/23028/7153/23157/5500/23047/5976/5905/7756/10910/5431/6396/1783/51164/8520/10051/10728/5515/9793/4436/6118/5499/8243/10189/8655/7175/201161/7514/55920/55506/6117/328/1642/9184/23468/9126/7158/11…	106
GO:0005684	CC	GO:0005684	U2-type spliceosomal complex	52/1791	93/19520	5.74596e-30	3.93023e-28	2.06854e-28	55692/8896/51340/9129/22938/26121/10286/6635/27336/11157/84844/9128/6631/5356/51747/6637/6627/9092/8175/51639/6636/51691/6638/83443/9939/27258/51645/9410/25804/55234/6629/4809/57819/988/51631/6625/23524/10946/6634/6632/9343/10291/11338/10992/9775/24148/10594/23020/6633/23450/27339/23451	52
GO:0101002	CC	GO:0101002	ficolin-1-rich granule	72/1791	185/19520	5.39741e-28	3.35621e-26	1.76643e-26	178/55860/4860/1508/1729/23114/5683/823/5713/847/23352/2495/10120/51143/10213/10092/55276/6993/327/5049/4048/1460/5695/4282/11333/28988/23406/230/5702/6727/9861/5718/161/5709/5594/5719/1509/1476/5689/5686/1315/10097/5879/5717/8655/5236/10549/47/387/5211/5708/3615/5701/10075/7414/2950/3417/3837/3608/5223/2547/7415/3320/10694/226/1938/3303/3304/3146/5315/1915/3312	72
GO:0042470	CC	GO:0042470	melanosome	53/1791	106/19520	2.49798e-27	1.31432e-25	6.91749e-26	23385/5868/1508/10972/10672/6386/8836/7037/80331/5869/10211/822/483/1267/6513/3688/10961/6520/526/9554/5878/10015/682/1509/5879/813/5862/27044/7879/23193/6184/5479/191/821/10130/5034/9601/302/4673/309/10575/7529/2923/2194/7184/3320/3309/1213/5901/5052/7531/3312/7534	53
GO:0048770	CC	GO:0048770	pigment granule	53/1791	106/19520	2.49798e-27	1.31432e-25	6.91749e-26	23385/5868/1508/10972/10672/6386/8836/7037/80331/5869/10211/822/483/1267/6513/3688/10961/6520/526/9554/5878/10015/682/1509/5879/813/5862/27044/7879/23193/6184/5479/191/821/10130/5034/9601/302/4673/309/10575/7529/2923/2194/7184/3320/3309/1213/5901/5052/7531/3312/7534	53
GO:1905368	CC	GO:1905368	peptidase complex	49/1791	92/19520	5.27379e-27	2.57662e-25	1.35612e-25	8295/11047/7337/5711/5721/5683/5714/5713/5716/10197/9789/10939/28972/5690/29979/9491/5720/10213/5710/5695/9097/5684/5704/5702/56893/9861/5694/5706/5718/5691/5700/5692/5709/5705/5685/5719/5689/5686/9352/5707/5682/5717/5688/5693/5687/5708/5701/3315/7415	49
GO:0034774	CC	GO:0034774	secretory granule lumen	95/1791	322/19520	1.0274e-25	4.68496e-24	2.46577e-24	178/25801/8566/30/55860/4860/23593/51097/23197/6386/5683/23071/8836/5713/23191/847/9798/374354/10120/10213/10092/55276/6993/1191/3959/56954/81567/5049/1460/5695/4282/28988/1727/2244/23406/230/10493/5702/6727/9861/5718/29789/51571/5709/5594/5719/1509/1476/5689/5686/2266/10097/87/5707/5717/10549/47/350/5211/5708/3615/5701/10075/5036/9588/7414/10487/7276/7520/302/2950/3417/3837/81/3608/10576/2171/52…	95
GO:0060205	CC	GO:0060205	cytoplasmic vesicle lumen	95/1791	326/19520	2.85154e-25	1.16418e-23	6.12727e-24	178/25801/8566/30/55860/4860/23593/51097/23197/6386/5683/23071/8836/5713/23191/847/9798/374354/10120/10213/10092/55276/6993/1191/3959/56954/81567/5049/1460/5695/4282/28988/1727/2244/23406/230/10493/5702/6727/9861/5718/29789/51571/5709/5594/5719/1509/1476/5689/5686/2266/10097/87/5707/5717/10549/47/350/5211/5708/3615/5701/10075/5036/9588/7414/10487/7276/7520/302/2950/3417/3837/81/3608/10576/2171/52…	95
GO:0044391	CC	GO:0044391	ribosomal subunit	69/1791	187/19520	2.89344e-25	1.16418e-23	6.12727e-24	6169/28985/9513/6138/4706/11224/6229/6164/6168/6157/6144/6209/9045/6137/6128/6141/6160/6143/6234/6232/6210/6165/6230/23521/6158/6139/6228/6224/6204/6194/6134/6152/6217/6203/6142/6231/6155/6201/6227/4736/6218/6156/6135/6193/6222/6207/6133/6189/6147/6206/6122/6132/6202/9349/6205/6136/6223/6129/6124/6125/6187/6208/6130/6175/3921/10399/6181/6188/6233	69
GO:0031983	CC	GO:0031983	vesicle lumen	95/1791	328/19520	4.71465e-25	1.79157e-23	9.4293e-24	178/25801/8566/30/55860/4860/23593/51097/23197/6386/5683/23071/8836/5713/23191/847/9798/374354/10120/10213/10092/55276/6993/1191/3959/56954/81567/5049/1460/5695/4282/28988/1727/2244/23406/230/10493/5702/6727/9861/5718/29789/51571/5709/5594/5719/1509/1476/5689/5686/2266/10097/87/5707/5717/10549/47/350/5211/5708/3615/5701/10075/5036/9588/7414/10487/7276/7520/302/2950/3417/3837/81/3608/10576/2171/52…	95
GO:0022625	CC	GO:0022625	cytosolic large ribosomal subunit	37/1791	57/19520	5.691e-25	2.04876e-23	1.0783e-23	6169/9513/6138/11224/6164/6168/6157/6144/9045/6137/6128/6141/6160/6143/6165/23521/6158/6139/6134/6152/6142/6155/4736/6156/6135/6133/6147/6122/6132/9349/6136/6129/6124/6125/6130/6175/6181	37
GO:0005840	CC	GO:0005840	ribosome	79/1791	243/19520	1.41585e-24	4.84222e-23	2.54854e-23	6169/28985/9513/6138/4706/11224/5610/6229/689/6164/23367/6168/6157/6144/8667/6209/9045/6137/6128/6141/6160/10985/6143/6234/6232/6210/6165/6730/6230/23521/6158/6139/6228/6224/7536/6204/6194/6134/6152/6217/6203/6142/6231/6155/6201/6227/4736/6218/6156/328/6135/6193/6222/6207/6133/6189/6147/6206/6122/6132/6202/9349/6205/6136/6223/6129/6124/6125/6187/6208/6130/6175/3921/10399/6181/6188/1660/1938/6233	79
GO:0022624	CC	GO:0022624	proteasome accessory complex	23/1791	24/19520	2.6602e-23	8.66466e-22	4.56035e-22	11047/5711/5721/5714/5713/5716/10197/5720/10213/5710/5704/5702/9861/5706/5718/5700/5709/5705/5719/5707/5717/5708/5701	23
GO:0097525	CC	GO:0097525	spliceosomal snRNP complex	44/1791	91/19520	3.67231e-22	1.14175e-20	6.00923e-21	55692/9129/26121/6635/27336/11157/84844/9128/6631/51747/6637/6627/9092/8175/10713/9416/51639/6636/51691/6638/83443/27258/9733/9410/25804/6629/4809/6626/57819/51631/6625/10946/6634/6632/9343/10291/10992/24148/10594/23020/6633/7919/23450/23451	44
GO:0071011	CC	GO:0071011	precatalytic spliceosome	33/1791	53/19520	1.44458e-21	4.29604e-20	2.26107e-20	9129/26121/6635/11157/84844/9128/6637/6627/9092/8175/51639/6636/51691/83443/27258/25804/55234/6629/4809/57819/23524/10946/6634/6632/9343/10291/10992/24148/10594/23020/6633/23450/23451	33
GO:0071005	CC	GO:0071005	U2-type precatalytic spliceosome	32/1791	50/19520	1.71616e-21	4.89107e-20	2.57425e-20	9129/26121/6635/11157/84844/9128/6637/6627/9092/8175/6636/51691/83443/27258/25804/55234/6629/4809/57819/23524/10946/6634/6632/9343/10291/10992/24148/10594/23020/6633/23450/23451	32
GO:0022627	CC	GO:0022627	cytosolic small ribosomal subunit	30/1791	46/19520	1.38942e-20	3.80145e-19	2.00076e-19	28985/6229/6209/6234/6232/6210/6230/6228/6224/6204/6194/6217/6203/6231/6201/6227/6218/6193/6222/6207/6189/6206/6202/6205/6223/6187/6208/3921/6188/6233	30
GO:0005838	CC	GO:0005838	proteasome regulatory particle	20/1791	21/19520	3.11339e-20	8.19061e-19	4.31085e-19	11047/5711/5714/5713/5716/10213/5710/5704/5702/9861/5706/5718/5700/5709/5705/5719/5707/5717/5708/5701	20
GO:0005844	CC	GO:0005844	polysome	36/1791	68/19520	4.40538e-20	1.11603e-18	5.87384e-19	6169/9513/689/8087/4733/23367/3069/1965/8667/7411/6128/6141/6160/10985/6143/6234/6228/4440/6194/6152/1981/6142/6231/5682/6227/4736/5687/6156/6135/6132/6130/6188/811/1660/1938/7431	36
GO:0030532	CC	GO:0030532	small nuclear ribonucleoprotein complex	44/1791	101/19520	6.52558e-20	1.59411e-18	8.39003e-19	55692/9129/26121/6635/27336/11157/84844/9128/6631/51747/6637/6627/9092/8175/10713/9416/51639/6636/51691/6638/83443/27258/9733/9410/25804/6629/4809/6626/57819/51631/6625/10946/6634/6632/9343/10291/10992/24148/10594/23020/6633/7919/23450/23451	44
GO:0016607	CC	GO:0016607	nuclear speck	99/1791	411/19520	1.30543e-19	3.07901e-18	1.62053e-18	51340/55671/9320/9129/9589/22938/26121/10286/6430/10250/23236/348995/9295/57187/10135/84248/92609/10482/84844/9128/113246/5356/10921/51747/5411/6729/10212/6627/5300/9092/10285/8175/51138/79068/23517/5936/11325/8926/11273/9879/58517/6651/10915/8241/9939/7307/102724594/9733/11052/9410/55234/10284/6629/22985/84271/6431/56252/9774/10051/988/51631/8683/8539/6625/9967/6432/26097/23435/23524/10946/6428/…	99
GO:0120114	CC	GO:0120114	Sm-like protein family complex	46/1791	113/19520	2.66229e-19	6.07003e-18	3.19475e-18	55692/9129/26121/6635/27336/11157/84844/9128/6631/51747/6637/6627/9092/25929/8175/10713/9416/51639/6636/51691/6638/83443/27258/9733/9410/25804/6629/4809/6626/57819/51631/6625/10946/6634/6632/9343/10291/11171/10992/24148/10594/23020/6633/7919/23450/23451	46
GO:0000781	CC	GO:0000781	chromosome, telomeric region	55/1791	161/19520	1.27882e-18	2.82165e-17	1.48508e-17	79577/25777/55651/55226/54386/546/57187/80335/23347/4361/5424/23028/5500/5976/5431/8520/10728/4436/6118/5499/10189/55506/6117/328/1642/23468/7158/11335/6741/4174/9555/4176/7520/4175/5111/4172/4171/142/2547/5591/3181/8294/8359/8360/8361/8362/8363/8364/8365/8366/8367/8368/8370/121504/554313	55
GO:0035770	CC	GO:0035770	ribonucleoprotein granule	66/1791	244/19520	3.88498e-16	8.30415e-15	4.37061e-15	80153/54888/4849/28960/26058/22907/23215/9513/5683/11157/10482/8189/7072/8087/51441/6637/6780/23367/9698/10658/1153/7150/5936/1965/11273/23644/9908/10146/5976/27258/6128/23019/25804/6629/84271/7812/9898/57819/5702/6158/26097/23435/5685/6194/1981/1656/5879/23589/8826/84324/5687/4137/1994/5701/1653/4076/6175/3837/4691/7415/1660/5093/3191/3192/203068/3190	66
GO:0000228	CC	GO:0000228	nuclear chromosome	66/1791	250/19520	1.44038e-15	2.98551e-14	1.57132e-14	8295/25777/10286/3065/8805/54386/546/7283/55193/23347/5356/25942/5424/9031/6605/81611/9918/7150/7153/6598/1457/120/6119/11052/10592/1104/7329/988/23435/86/8467/10128/6118/8607/8243/55506/6117/10856/3066/9126/4174/9555/4176/5928/27339/8091/4175/5111/4172/4171/1660/3192/8294/8359/8360/8361/8362/8363/8364/8365/8366/8367/8368/8370/121504/554313	66
GO:0098800	CC	GO:0098800	inner mitochondrial membrane protein complex	47/1791	142/19520	1.65691e-15	3.33332e-14	1.75438e-14	126328/4709/4728/51079/55750/27089/4704/4723/10651/4698/25813/4706/4712/4702/1537/6390/4705/4724/92609/55967/4729/10939/4720/9377/4697/4722/7381/10632/6389/54927/293/509/10476/522/4719/7386/11331/1327/539/515/5245/7384/7385/10989/3313/498/506	47
GO:0005938	CC	GO:0005938	cell cortex	74/1791	301/19520	1.76484e-15	3.44901e-14	1.81527e-14	23265/388/149371/23233/444/55770/10640/60412/84687/2319/1212/26086/824/10211/23122/382/54874/23085/23332/55915/2037/1211/23157/4646/120/6513/2010/10890/2035/51164/28988/10539/55964/3996/11151/2244/23406/800/5962/2017/830/1488/10097/5879/1500/6712/23603/387/3927/11034/10121/9948/1397/10801/2317/22919/5048/1639/794/9590/4735/10487/989/55752/4691/6711/4926/7430/1627/6624/1778/2316/1915/4082	74
GO:0036464	CC	GO:0036464	cytoplasmic ribonucleoprotein granule	63/1791	234/19520	2.32323e-15	4.41415e-14	2.32323e-14	80153/54888/4849/28960/26058/23215/9513/5683/11157/10482/7072/8087/51441/6637/6780/23367/9698/10658/1153/7150/5936/1965/11273/23644/9908/10146/5976/27258/6128/23019/25804/6629/84271/7812/9898/57819/5702/6158/26097/23435/5685/6194/1981/1656/5879/23589/8826/84324/5687/4137/1994/5701/1653/4076/6175/3837/4691/7415/1660/5093/3192/203068/3190	63
GO:0030426	CC	GO:0030426	growth cone	53/1791	178/19520	4.15743e-15	7.68563e-14	4.04507e-14	1020/867/23265/149371/10006/60412/8882/84687/9513/114787/23191/57698/4035/8087/11344/57447/10094/6616/3897/29767/26958/10092/6993/1525/1785/2017/1996/22902/1500/1314/3799/8826/4137/58155/2288/2823/11075/10540/10236/2596/3320/1627/10381/6624/4133/1809/2316/801/808/1400/10409/7531/4131	53
GO:0030427	CC	GO:0030427	site of polarized growth	54/1791	184/19520	4.52377e-15	8.14279e-14	4.28568e-14	1020/867/23265/149371/10006/60412/8882/84687/9513/114787/23191/57698/4035/8087/11344/57447/10094/6616/3897/29767/26958/10092/6993/1525/1785/28988/2017/1996/22902/1500/1314/3799/8826/4137/58155/2288/2823/11075/10540/10236/2596/3320/1627/10381/6624/4133/1809/2316/801/808/1400/10409/7531/4131	54
GO:0000775	CC	GO:0000775	chromosome, centromeric region	56/1791	196/19520	5.12488e-15	8.98826e-14	4.73066e-14	115426/11143/25909/23279/1788/283489/348995/134492/9183/55746/81929/546/79902/10428/25942/11258/23122/64151/23244/84295/23332/9031/4659/51143/9918/7153/23157/23047/5905/7756/10910/6396/1783/51164/10051/5515/9793/8243/8655/7175/201161/7514/55920/9184/23468/9126/7158/11335/10540/5048/1639/4735/9555/989/5518/3192	56
GO:0042788	CC	GO:0042788	polysomal ribosome	21/1791	32/19520	7.02305e-15	1.20094e-13	6.32074e-14	6169/689/23367/8667/6128/6141/6160/6143/6234/6228/6152/6142/6231/6227/4736/6156/6135/6132/6130/1660/1938	21
GO:0071007	CC	GO:0071007	U2-type catalytic step 2 spliceosome	20/1791	30/19520	1.97469e-14	3.29436e-13	1.73387e-13	8896/51340/22938/10286/6635/5356/6637/6627/6636/51645/9410/6629/988/23524/6634/6632/9343/10594/6633/27339	20
GO:0005852	CC	GO:0005852	eukaryotic translation initiation factor 3 complex	15/1791	17/19520	2.96546e-14	4.82947e-13	2.54183e-13	8665/10987/10480/6059/8667/8662/8666/8669/27335/51386/8664/3646/8668/8663/8661	15
GO:0033290	CC	GO:0033290	eukaryotic 48S preinitiation complex	14/1791	15/19520	3.92666e-14	6.24613e-13	3.28744e-13	8665/1965/10480/8667/8662/8666/8669/27335/51386/8664/3646/8668/8663/8661	14
GO:0046540	CC	GO:0046540	U4/U6 x U5 tri-snRNP complex	23/1791	41/19520	4.78486e-14	7.43828e-13	3.91488e-13	9129/26121/6635/11157/9128/6637/9092/10713/9416/6636/51691/6638/27258/25804/4809/57819/6634/6632/9343/24148/10594/23020/6633	23
GO:0005686	CC	GO:0005686	U2 snRNP	18/1791	25/19520	5.02948e-14	7.6448e-13	4.02358e-13	6635/27336/84844/6637/6627/8175/51639/6638/83443/6629/10946/6634/6632/10291/10992/6633/23450/23451	18
GO:0015935	CC	GO:0015935	small ribosomal subunit	31/1791	74/19520	7.13989e-14	1.06167e-12	5.58774e-13	28985/6229/6209/6234/6232/6210/6230/6228/6224/6204/6194/6217/6203/6231/6201/6227/6218/6193/6222/6207/6189/6206/6202/6205/6223/6187/6208/3921/10399/6188/6233	31
GO:0097526	CC	GO:0097526	spliceosomal tri-snRNP complex	23/1791	42/19520	9.65999e-14	1.40584e-12	7.39914e-13	9129/26121/6635/11157/9128/6637/9092/10713/9416/6636/51691/6638/27258/25804/4809/57819/6634/6632/9343/24148/10594/23020/6633	23
GO:0030120	CC	GO:0030120	vesicle coat	26/1791	55/19520	2.29176e-13	3.26575e-12	1.71882e-12	25977/11316/1175/57410/10016/29924/1212/8301/22818/164/26958/22820/1211/9632/22872/1173/372/6396/10484/160/161/9276/1315/1314/163/1213	26
GO:0005874	CC	GO:0005874	microtubule	87/1791	423/19520	4.27303e-13	5.9648e-12	3.13937e-12	1020/22911/5605/26052/89796/79187/2931/10013/22924/23098/9183/7283/4130/55201/10982/57698/27436/11258/23122/64837/23332/51143/2009/81631/9181/6993/51181/1785/9112/2010/8452/7756/6904/140735/79969/10059/1783/84617/83658/347688/7178/10382/1781/10128/9793/8661/3799/8655/403/10726/8826/6902/55920/4137/1155/10801/2288/10808/1641/23499/22919/10540/5048/1639/22948/4134/10574/10575/6950/7203/10576/4926/1…	87
GO:0015934	CC	GO:0015934	large ribosomal subunit	38/1791	115/19520	8.77689e-13	1.20068e-11	6.31936e-12	6169/9513/6138/4706/11224/6164/6168/6157/6144/9045/6137/6128/6141/6160/6143/6165/23521/6158/6139/6134/6152/6142/6155/4736/6156/6135/6133/6147/6122/6132/9349/6136/6129/6124/6125/6130/6175/6181	38
GO:1990204	CC	GO:1990204	oxidoreductase complex	37/1791	111/19520	1.29274e-12	1.73379e-11	9.12521e-12	126328/4709/4728/51079/27089/4704/4723/4698/4706/4712/4702/1537/6390/4705/4724/55967/4729/80777/4720/1743/1737/4697/4722/4967/1738/7381/5160/5162/6389/1727/2820/4719/7386/6240/7384/7385/5034	37
GO:0150034	CC	GO:0150034	distal axon	66/1791	287/19520	1.64597e-12	2.16509e-11	1.13952e-11	1020/867/23413/23265/149371/22848/10006/5868/64780/60412/8882/84687/9513/57465/114787/8943/28964/23191/57698/4035/8087/11344/57447/10094/6616/3897/29767/26958/10092/6993/23157/1525/1785/2805/3673/6717/2017/1996/22902/1500/1314/3799/8826/4137/58155/2288/2823/11075/10540/794/10236/2596/3320/1627/10381/6624/4133/1809/2316/801/808/1400/10409/7531/4131/3312	66
GO:0030496	CC	GO:0030496	midbody	51/1791	193/19520	2.31097e-12	2.98246e-11	1.56971e-11	23265/51100/55770/10640/64780/60412/5586/51097/283489/4218/22924/55226/23636/7251/115098/10659/27436/11258/382/2773/51056/9798/5300/822/23157/1785/23170/6513/5898/5962/10015/1500/201161/403/10726/8826/387/55920/25932/6294/2079/4735/989/302/10399/7184/3309/2664/5901/3192/1400	51
GO:0005839	CC	GO:0005839	proteasome core complex	15/1791	20/19520	2.58739e-12	3.27736e-11	1.72493e-11	5683/5690/9491/5695/5684/5694/5691/5692/5685/5689/5686/5682/5688/5693/5687	15
GO:0018995	CC	GO:0018995	host cellular component	26/1791	60/19520	2.85472e-12	3.48683e-11	1.83517e-11	23279/89853/23165/348995/23636/55746/81929/79902/7251/4927/8021/9631/3839/8480/3836/23225/6993/51160/6396/9688/3838/7175/7514/3837/5901/6233	26
GO:0043657	CC	GO:0043657	host cell	26/1791	60/19520	2.85472e-12	3.48683e-11	1.83517e-11	23279/89853/23165/348995/23636/55746/81929/79902/7251/4927/8021/9631/3839/8480/3836/23225/6993/51160/6396/9688/3838/7175/7514/3837/5901/6233	26
GO:0031252	CC	GO:0031252	cell leading edge	83/1791	411/19520	4.09454e-12	4.91345e-11	2.58603e-11	1020/149371/22848/5921/57669/26060/10006/57175/5868/5586/3611/3685/84687/2319/1729/10013/55198/83543/5058/23191/199731/57698/6643/207/11344/9748/10211/5756/23122/382/10094/822/10788/83660/9181/55704/10092/10152/6993/1785/4646/378/55740/28988/3688/11151/5335/526/5962/2017/10109/10787/22902/10097/5879/23136/1500/87/23603/8826/387/4137/10096/4076/4830/11075/23499/375/5048/7094/23224/5034/1495/6188/6…	83
GO:0070993	CC	GO:0070993	translation preinitiation complex	14/1791	18/19520	6.13717e-12	7.23763e-11	3.80928e-11	8665/1965/10480/8667/8662/8666/8669/27335/51386/8664/3646/8668/8663/8661	14
GO:0034399	CC	GO:0034399	nuclear periphery	39/1791	128/19520	7.80711e-12	9.05096e-11	4.76366e-11	25909/1788/11260/10580/22938/23165/10250/10238/84844/1073/284695/29128/8573/3692/9688/8520/11331/8607/8243/55269/7175/5687/4137/10856/25932/9126/7919/5111/6421/9782/4926/4841/4670/3192/4001/1072/10409/3181/7431	39
GO:0005759	CC	GO:0005759	mitochondrial matrix	91/1791	476/19520	9.28456e-12	1.05844e-10	5.57074e-11	4728/5091/84532/22907/4704/23597/26275/3033/1841/5770/7915/133686/18/1666/5096/3029/9512/4706/55347/4705/7019/5303/2876/10469/54936/8801/5095/2936/4357/4521/128240/4720/4329/6648/1743/8802/5859/1737/2109/3032/6059/4722/4200/9361/4967/1632/1738/5160/8803/5162/708/10449/1892/2108/55379/10131/6742/2617/2271/509/1431/6472/3735/4719/5019/10128/38/6647/10935/2806/515/57805/3336/3028/3030/50/25824/7284/…	91
GO:0005635	CC	GO:0005635	nuclear envelope	88/1791	462/19520	2.51492e-11	2.82001e-10	1.48421e-10	25909/23279/10269/9330/11260/10424/25777/1717/9589/221496/23165/6386/23236/581/348995/23636/23534/55746/23190/81929/5058/79902/10482/79188/4927/5356/4521/22929/8021/9798/7112/9631/3839/8480/10204/3836/23/23225/8498/3930/55749/327/4646/3840/9112/2010/92140/5905/6396/9688/23039/55379/1104/10434/7329/51495/6434/10128/27101/55705/10527/6240/7175/201161/9218/7514/8815/23468/51155/9805/11335/5048/1639/…	88
GO:0008180	CC	GO:0008180	COP9 signalosome	19/1791	36/19520	3.31777e-11	3.6181e-10	1.90426e-10	9318/64708/2873/2885/10211/10987/10920/10980/2037/51138/30968/8533/5335/8655/498/3309/3303/3304/10409	19
GO:0005643	CC	GO:0005643	nuclear pore	30/1791	85/19520	3.33246e-11	3.6181e-10	1.90426e-10	25909/23279/11260/23165/348995/23636/55746/81929/79902/10482/4927/8021/9631/3839/8480/10204/3836/23225/8498/5905/6396/9688/23039/10527/7175/5902/3843/3837/1984/5901	30
GO:0008540	CC	GO:0008540	proteasome regulatory particle, base subcomplex	11/1791	12/19520	4.14843e-11	4.43363e-10	2.33349e-10	5711/5716/5710/5704/5702/5706/5700/5705/5707/5708/5701	11
GO:0016282	CC	GO:0016282	eukaryotic 43S preinitiation complex	13/1791	17/19520	5.24612e-11	5.52053e-10	2.90554e-10	8665/10480/8667/8662/8666/8669/27335/51386/8664/3646/8668/8663/8661	13
GO:0030027	CC	GO:0030027	lamellipodium	49/1791	196/19520	5.38896e-11	5.58492e-10	2.93943e-10	1020/10006/57175/5586/3611/3685/84687/2319/5058/23191/57698/6643/207/11344/10211/10094/822/10788/55704/10092/10152/6993/1785/55740/28988/3688/11151/5335/5962/2017/10109/10787/22902/10097/5879/1500/23603/387/10096/4076/11075/23224/5034/1495/1627/10381/6624/1809/1072	49
GO:0098803	CC	GO:0098803	respiratory chain complex	30/1791	87/19520	6.50969e-11	6.64572e-10	3.49775e-10	126328/4709/4728/51079/27089/4704/4723/4698/4706/4712/4702/1537/6390/4705/4724/55967/4729/4720/9377/4697/4722/1340/7381/6389/4513/4719/7386/1327/7384/7385	30
GO:0000776	CC	GO:0000776	kinetochore	39/1791	137/19520	7.79762e-11	7.84349e-10	4.12815e-10	25909/23279/283489/348995/134492/9183/55746/81929/79902/10428/25942/11258/23122/84295/23332/4659/51143/23157/5905/7756/10910/6396/1783/51164/9793/8243/8655/7175/201161/7514/9184/23468/7158/10540/5048/1639/4735/989/3192	39
GO:0098798	CC	GO:0098798	mitochondrial protein-containing complex	59/1791	265/19520	9.95198e-11	9.86545e-10	5.19234e-10	126328/4709/4728/51079/55750/27089/4704/4723/10651/4698/25813/9512/4706/4712/4702/581/1537/10452/6390/4705/4724/56993/92609/8801/55967/4729/10939/4720/1737/9377/4697/4722/7381/5160/5162/10632/6389/54927/9868/293/509/10476/522/4719/7386/11331/1327/539/515/5245/3028/7384/3030/7385/10989/7416/3313/498/506	59
GO:0005819	CC	GO:0005819	spindle	75/1791	381/19520	1.56533e-10	1.52955e-09	8.05027e-10	54888/55700/1729/283489/22924/134492/23636/9183/7283/55201/79902/5303/112755/10982/51119/207/27436/11258/23122/7443/822/79718/23332/8480/51143/2009/9181/6993/1211/23157/23170/2010/8452/5905/7756/2035/79969/51164/51637/2017/347688/5594/7178/5515/9793/55968/8243/8655/57805/7175/201161/403/10726/55920/9126/292/11335/22919/5048/1639/4735/27339/4134/989/3315/6188/4926/1213/4869/3192/9859/801/805/808/1…	75
GO:0030117	CC	GO:0030117	membrane coat	30/1791	92/19520	3.13706e-10	2.98021e-09	1.56853e-09	25977/11316/1175/57410/10016/29924/8907/8943/1212/8301/22818/164/26958/22820/162/58513/1211/9632/22872/1173/372/6396/10484/160/161/9276/1315/1314/163/1213	30
GO:0048475	CC	GO:0048475	coated membrane	30/1791	92/19520	3.13706e-10	2.98021e-09	1.56853e-09	25977/11316/1175/57410/10016/29924/8907/8943/1212/8301/22818/164/26958/22820/162/58513/1211/9632/22872/1173/372/6396/10484/160/161/9276/1315/1314/163/1213	30
GO:0070469	CC	GO:0070469	respirasome	32/1791	103/19520	3.31653e-10	3.10754e-09	1.63555e-09	126328/4709/4728/51079/54205/27089/4704/4723/4698/4706/4712/4702/1537/6390/4705/4724/55967/4729/4720/9377/4697/4722/1340/7381/6389/4513/4719/23530/7386/1327/7384/7385	32
GO:0098978	CC	GO:0098978	glutamatergic synapse	64/1791	308/19520	3.49594e-10	3.23138e-09	1.70073e-09	1020/23413/10142/6456/1948/56850/26052/5532/613/10082/4218/23236/8943/8087/10211/382/6780/5300/6616/5577/6857/3092/22839/3836/5573/79012/8618/1785/3337/378/140735/708/6455/2932/3838/6232/6812/11151/5335/10109/11331/1488/8775/5879/5499/1500/87/6712/5245/387/1994/163/2823/9775/2239/5062/375/55752/7415/1627/2316/7531/3312/7534	64
GO:0016363	CC	GO:0016363	nuclear matrix	33/1791	109/19520	3.76413e-10	3.43289e-09	1.80678e-09	25909/1788/11260/10580/22938/10250/10238/84844/1073/284695/29128/8573/8520/11331/8607/8243/55269/5687/10856/25932/9126/7919/6421/9782/4926/4841/4670/3192/4001/1072/10409/3181/7431	33
GO:0030863	CC	GO:0030863	cortical cytoskeleton	32/1791	104/19520	4.37301e-10	3.93571e-09	2.07143e-09	84687/2319/824/10211/23085/23332/55915/2037/6513/2035/28988/3996/11151/23406/800/5962/2017/830/10097/6712/3927/11034/9948/22919/794/10487/6711/4926/7430/1627/2316/1915	32
GO:0005746	CC	GO:0005746	mitochondrial respirasome	29/1791	89/19520	6.29966e-10	5.59606e-09	2.9453e-09	126328/4709/4728/51079/27089/4704/4723/4698/4706/4712/4702/1537/6390/4705/4724/55967/4729/4720/9377/4697/4722/7381/6389/4719/23530/7386/1327/7384/7385	29
GO:0005743	CC	GO:0005743	mitochondrial inner membrane	87/1791	493/19520	1.79269e-09	1.57205e-08	8.27397e-09	1159/548596/126328/4709/4728/51079/55750/54205/27089/4704/4723/2628/10651/5770/91942/4698/25813/8604/9512/4706/4712/1345/4702/29957/1537/10452/6390/4705/4724/79751/10165/81855/10469/4976/5832/92609/6576/55967/4729/10939/4720/9131/23788/9377/3032/4697/1191/4722/1267/30968/8402/3954/1340/7381/10632/6389/10131/54927/4513/2820/293/509/10476/522/6472/1329/4719/23530/7386/94081/11331/1327/2806/539/515/…	87
GO:0034709	CC	GO:0034709	methylosome	10/1791	12/19520	2.29377e-09	1.986e-08	1.04526e-08	6635/6637/79084/6636/10419/6634/6632/2079/6633/3276	10
GO:0010494	CC	GO:0010494	cytoplasmic stress granule	25/1791	73/19520	2.95168e-09	2.52368e-08	1.32825e-08	26058/23215/10482/7072/6780/23367/9698/10658/1153/5936/1965/11273/9908/10146/7812/9898/23435/1981/1656/1994/1653/4076/3837/7415/3190	25
GO:0030137	CC	GO:0030137	COPI-coated vesicle	15/1791	28/19520	3.06682e-09	2.58976e-08	1.36303e-08	11316/57410/10972/10959/22818/26958/22820/55704/372/9554/9276/1315/1314/10121/375	15
GO:0030175	CC	GO:0030175	filopodium	30/1791	103/19520	6.46001e-09	5.38859e-08	2.8361e-08	1020/10006/3685/84687/9513/23191/57698/10160/8087/11344/5756/382/10788/10152/1525/3093/4646/55740/3688/160/5962/22902/4478/2823/23224/2596/7430/10381/6624/4133	30
GO:0005775	CC	GO:0005775	vacuolar lumen	41/1791	173/19520	1.05692e-08	8.71005e-08	4.58424e-08	25801/55860/23593/1508/10082/23197/6386/23646/950/8836/375790/9798/81567/5660/221914/1727/3339/10493/5594/1509/10097/5707/47/1462/2817/5036/2239/9588/10487/7276/302/10576/2171/7415/3320/10694/2665/1778/203068/10383/3312	41
GO:0032993	CC	GO:0032993	protein-DNA complex	46/1791	208/19520	1.40407e-08	1.14331e-07	6.01744e-08	57418/10286/54386/5437/5356/84656/5424/7150/3024/6119/988/6118/3005/55506/6117/50809/4174/9555/4176/27339/7520/8091/4175/5111/4172/4171/8971/142/2547/5591/4869/3009/8294/8359/8360/8361/8362/8363/8364/8365/8366/8367/8368/8370/121504/554313	46
GO:0030662	CC	GO:0030662	coated vesicle membrane	42/1791	182/19520	1.61313e-08	1.2981e-07	6.83208e-08	25977/6456/11316/1175/5868/57410/10016/29924/10972/8907/1212/950/7037/8301/80331/10959/6857/22818/3092/164/26958/22820/162/1211/9632/4646/22872/1173/372/6396/10484/28988/8615/160/161/9554/9276/1315/1314/163/1213/3312	42
GO:0070603	CC	GO:0070603	SWI/SNF superfamily-type complex	24/1791	74/19520	2.06553e-08	1.64282e-07	8.6464e-08	1107/8295/6594/3065/53615/55193/5931/51773/6599/6605/81611/6598/1457/9112/8289/6597/6601/9219/86/8467/8607/10856/3066/5928	24
GO:0017101	CC	GO:0017101	aminoacyl-tRNA synthetase multienzyme complex	9/1791	11/19520	2.09649e-08	1.64827e-07	8.67512e-08	5859/4141/9255/3376/5917/51520/3735/2058/1615	9
GO:0099572	CC	GO:0099572	postsynaptic specialization	63/1791	333/19520	2.22666e-08	1.73072e-07	9.10905e-08	1020/408/23413/6169/6801/10006/26052/613/84687/9513/4218/10243/6009/8087/53335/1630/10486/22839/3836/1785/9045/3337/6128/120/119/2035/3188/140735/6455/9201/28988/3838/6232/4905/6230/5594/11331/10097/1500/8661/5094/5245/6156/118/6222/6207/6132/5062/9349/375/6136/6223/6129/6208/6175/55752/57142/6188/2171/2596/1627/4131/3312	63
GO:0035578	CC	GO:0035578	azurophil granule lumen	27/1791	91/19520	2.36194e-08	1.81524e-07	9.55392e-08	25801/55860/23593/23197/6386/8836/9798/81567/1727/10493/5594/10097/5707/47/5036/9588/10487/7276/302/10576/2171/7415/10694/2665/1778/203068/10383	27
GO:0071004	CC	GO:0071004	U2-type prespliceosome	11/1791	17/19520	2.76681e-08	2.07967e-07	1.09456e-07	55692/6631/51747/6637/8175/6638/51631/6625/10291/11338/23451	11
GO:0071010	CC	GO:0071010	prespliceosome	11/1791	17/19520	2.76681e-08	2.07967e-07	1.09456e-07	55692/6631/51747/6637/8175/6638/51631/6625/10291/11338/23451	11
GO:0005905	CC	GO:0005905	clathrin-coated pit	23/1791	71/19520	4.15591e-08	3.08983e-07	1.62623e-07	408/25977/22848/1175/29924/9892/1212/7037/8301/4035/58513/1211/1785/4646/1173/79969/10059/160/161/2017/163/1213/3329	23
GO:0030135	CC	GO:0030135	coated vesicle	57/1791	295/19520	4.84436e-08	3.56295e-07	1.87523e-07	25977/55681/22848/6456/11316/1175/5868/57410/10016/57222/29924/9892/10972/4218/8907/1212/950/7037/8301/80331/4035/10134/10959/6857/22818/3092/164/26958/22820/55704/162/1211/9632/1785/4646/22872/8724/1173/372/6396/10484/28988/8615/160/161/9554/51552/9522/9276/1315/1314/10121/163/375/1213/3329/3312	57
GO:0030864	CC	GO:0030864	cortical actin cytoskeleton	24/1791	78/19520	6.49038e-08	4.72279e-07	2.48568e-07	84687/2319/824/10211/55915/2037/6513/28988/3996/11151/23406/800/5962/2017/10097/6712/3927/11034/9948/794/10487/6711/1627/1915	24
GO:0014069	CC	GO:0014069	postsynaptic density	59/1791	313/19520	7.07098e-08	5.0911e-07	2.67953e-07	1020/408/23413/6169/6801/10006/26052/613/84687/9513/4218/10243/6009/8087/53335/1630/10486/3836/1785/9045/3337/6128/120/119/2035/3188/140735/6455/9201/28988/6232/4905/6230/5594/11331/10097/1500/8661/5094/5245/6156/118/6222/6207/6132/5062/9349/375/6136/6223/6129/6208/6175/57142/6188/2171/2596/1627/4131	59
GO:0090734	CC	GO:0090734	site of DNA damage	26/1791	91/19520	9.97179e-08	7.1049e-07	3.73942e-07	11143/25939/23376/8065/23347/54936/4361/10093/10094/10092/6119/56893/10552/10109/10097/6118/6117/1642/10096/23468/7158/11335/27339/7520/142/7415	26
GO:1904949	CC	GO:1904949	ATPase complex	28/1791	103/19520	1.04685e-07	7.38194e-07	3.88523e-07	1107/8295/6594/3065/53615/55193/5931/5984/51773/481/6599/6605/81611/6598/483/1457/9112/8289/6597/6601/9219/86/8467/8607/10856/3066/5928/7415	28
GO:0032279	CC	GO:0032279	asymmetric synapse	59/1791	318/19520	1.25621e-07	8.7678e-07	4.61463e-07	1020/408/23413/6169/6801/10006/26052/613/84687/9513/4218/10243/6009/8087/53335/1630/10486/3836/1785/9045/3337/6128/120/119/2035/3188/140735/6455/9201/28988/6232/4905/6230/5594/11331/10097/1500/8661/5094/5245/6156/118/6222/6207/6132/5062/9349/375/6136/6223/6129/6208/6175/57142/6188/2171/2596/1627/4131	59
GO:0009295	CC	GO:0009295	nucleoid	17/1791	44/19520	1.32287e-07	9.04843e-07	4.76233e-07	22907/7019/6648/3032/9361/55379/6742/6472/10128/3028/3030/7284/292/7417/7416/3313/506	17
GO:0042645	CC	GO:0042645	mitochondrial nucleoid	17/1791	44/19520	1.32287e-07	9.04843e-07	4.76233e-07	22907/7019/6648/3032/9361/55379/6742/6472/10128/3028/3030/7284/292/7417/7416/3313/506	17
GO:0098984	CC	GO:0098984	neuron to neuron synapse	62/1791	342/19520	1.43791e-07	9.73794e-07	5.12523e-07	1020/408/23413/6169/6456/6801/10006/26052/613/84687/9513/4218/10243/6009/8087/53335/1630/6857/10486/3836/1785/9045/3337/6128/120/119/2035/3188/140735/6455/9201/28988/6232/4905/6230/5594/11331/10097/1500/8661/5094/5245/6156/118/6222/6207/6132/5062/9349/375/6136/6223/6129/6208/6175/55752/57142/6188/2171/2596/1627/4131	62
GO:0030132	CC	GO:0030132	clathrin coat of coated pit	10/1791	16/19520	1.96982e-07	1.30873e-06	6.88804e-07	1175/1212/8301/58513/1211/1173/160/161/163/1213	10
GO:0005747	CC	GO:0005747	mitochondrial respiratory chain complex I	18/1791	50/19520	2.00901e-07	1.30873e-06	6.88804e-07	126328/4709/4728/51079/4704/4723/4698/4706/4712/4702/4705/4724/55967/4729/4720/4697/4722/4719	18
GO:0030964	CC	GO:0030964	NADH dehydrogenase complex	18/1791	50/19520	2.00901e-07	1.30873e-06	6.88804e-07	126328/4709/4728/51079/4704/4723/4698/4706/4712/4702/4705/4724/55967/4729/4720/4697/4722/4719	18
GO:0045271	CC	GO:0045271	respiratory chain complex I	18/1791	50/19520	2.00901e-07	1.30873e-06	6.88804e-07	126328/4709/4728/51079/4704/4723/4698/4706/4712/4702/4705/4724/55967/4729/4720/4697/4722/4719	18
GO:0005687	CC	GO:0005687	U4 snRNP	9/1791	13/19520	2.29668e-07	1.46816e-06	7.72715e-07	26121/6635/6637/6636/6638/6634/6632/6633/7919	9
GO:0030126	CC	GO:0030126	COPI vesicle coat	9/1791	13/19520	2.29668e-07	1.46816e-06	7.72715e-07	11316/57410/22818/26958/22820/372/9276/1315/1314	9
GO:0101031	CC	GO:0101031	chaperone complex	13/1791	28/19520	3.13289e-07	1.98417e-06	1.0443e-06	51726/5536/11140/10728/22948/10574/10575/6950/10963/7203/10576/10694/3312	13
GO:0000793	CC	GO:0000793	condensed chromosome	44/1791	217/19520	3.99368e-07	2.50613e-06	1.31901e-06	25909/25777/283489/348995/134492/9183/55746/81929/546/7283/79902/10428/11258/23122/64151/84295/23332/9031/51143/9918/7153/23157/120/5905/7756/10592/1104/7329/8467/10128/9793/8243/201161/8815/9184/9126/7158/11335/4735/9555/989/3148/3192/3146	44
GO:0001726	CC	GO:0001726	ruffle	38/1791	175/19520	4.05795e-07	2.52331e-06	1.32806e-06	5921/57669/26060/5868/3685/84687/1729/55198/83543/5058/23191/5756/23122/382/822/83660/9181/1785/4646/378/28988/3688/5335/526/2017/10787/5879/87/23603/8826/4830/23499/7094/6188/7430/6624/1072/1915	38
GO:0005766	CC	GO:0005766	primary lysosome	35/1791	155/19520	4.30874e-07	2.63141e-06	1.38495e-06	25801/23385/6836/55860/23593/79888/23197/6386/8836/80331/9798/8417/81567/5660/1727/10493/5594/5878/10097/5707/9218/47/5036/9588/10487/7276/302/10576/2171/7415/10694/2665/1778/203068/10383	35
GO:0042582	CC	GO:0042582	azurophil granule	35/1791	155/19520	4.30874e-07	2.63141e-06	1.38495e-06	25801/23385/6836/55860/23593/79888/23197/6386/8836/80331/9798/8417/81567/5660/1727/10493/5594/5878/10097/5707/9218/47/5036/9588/10487/7276/302/10576/2171/7415/10694/2665/1778/203068/10383	35
GO:0005685	CC	GO:0005685	U1 snRNP	14/1791	33/19520	4.35688e-07	2.63726e-06	1.38803e-06	55692/6635/6631/51747/6637/6636/6638/6629/6626/51631/6625/6634/6632/6633	14
GO:0000779	CC	GO:0000779	condensed chromosome, centromeric region	29/1791	117/19520	5.3418e-07	3.20508e-06	1.68688e-06	25909/283489/348995/134492/9183/55746/81929/546/79902/10428/11258/23122/64151/84295/23332/51143/9918/23157/5905/7756/9793/8243/201161/9184/7158/11335/4735/989/3192	29
GO:0030904	CC	GO:0030904	retromer complex	11/1791	21/19520	5.56966e-07	3.31274e-06	1.74355e-06	112936/29934/81609/6643/9559/51479/51699/8724/55737/7879/1639	11
GO:0030663	CC	GO:0030663	COPI-coated vesicle membrane	10/1791	18/19520	9.05913e-07	5.34176e-06	2.81145e-06	11316/57410/10959/22818/26958/22820/372/9276/1315/1314	10
GO:0016581	CC	GO:0016581	NuRD complex	9/1791	15/19520	1.3552e-06	7.85556e-06	4.1345e-06	1107/3065/53615/5931/1457/9112/9219/3066/5928	9
GO:0090545	CC	GO:0090545	CHD-type complex	9/1791	15/19520	1.3552e-06	7.85556e-06	4.1345e-06	1107/3065/53615/5931/1457/9112/9219/3066/5928	9
GO:0005682	CC	GO:0005682	U5 snRNP	11/1791	23/19520	1.795e-06	1.03175e-05	5.43025e-06	6635/6637/9416/6638/9410/6634/6632/24148/10594/23020/6633	11
GO:0005798	CC	GO:0005798	Golgi-associated vesicle	24/1791	92/19520	1.8768e-06	1.06977e-05	5.63039e-06	11316/57410/10972/4218/1212/4924/10959/22818/164/26958/22820/55704/1211/23256/372/160/9554/51552/9276/1315/1314/10121/375/1213	24
GO:0030125	CC	GO:0030125	clathrin vesicle coat	12/1791	28/19520	2.57939e-06	1.4581e-05	7.67422e-06	25977/1175/29924/1212/8301/164/1211/1173/160/161/163/1213	12
GO:0035145	CC	GO:0035145	exon-exon junction complex	10/1791	20/19520	3.22014e-06	1.79262e-05	9.43482e-06	10921/5411/84305/9939/5976/10284/9967/10189/9775/6426	10
GO:0140534	CC	GO:0140534	endoplasmic reticulum protein-containing complex	29/1791	127/19520	3.22356e-06	1.79262e-05	9.43482e-06	26043/55666/23197/6748/23480/439/9183/201595/9789/28972/51144/3703/10952/51035/509/2280/10525/6185/6726/23193/6184/5589/10130/5034/2923/7415/811/3309/506	29
GO:0000118	CC	GO:0000118	histone deacetylase complex	21/1791	77/19520	3.77841e-06	2.08422e-05	1.09696e-05	1107/8295/283248/10013/3065/53615/5931/51780/25942/79718/81611/1457/9112/3094/10284/9219/8607/10856/3066/23468/5928	21
GO:0005689	CC	GO:0005689	U12-type spliceosomal complex	12/1791	29/19520	4.033e-06	2.20686e-05	1.1615e-05	6635/84844/6637/51639/6636/83443/6634/6632/10992/6633/23450/23451	12
GO:0000974	CC	GO:0000974	Prp19 complex	8/1791	13/19520	4.17623e-06	2.26709e-05	1.19321e-05	51340/10286/5430/5356/988/11338/27339/3312	8
GO:0072686	CC	GO:0072686	mitotic spindle	33/1791	157/19520	4.84594e-06	2.60994e-05	1.37365e-05	1729/22924/134492/23636/7283/27436/23122/822/79718/23332/8480/2009/8452/5905/2035/79969/51637/2017/5594/8243/8655/7175/10726/55920/9126/22919/1639/4134/6188/4926/1213/3192/9859	33
GO:0031080	CC	GO:0031080	nuclear pore outer ring	7/1791	10/19520	5.06266e-06	2.70536e-05	1.42387e-05	25909/23279/348995/55746/81929/79902/6396	7
GO:0005868	CC	GO:0005868	cytoplasmic dynein complex	10/1791	21/19520	5.64121e-06	2.99115e-05	1.57429e-05	51143/6993/140735/1783/51164/83658/1781/8655/7175/1778	10
GO:0030118	CC	GO:0030118	clathrin coat	15/1791	45/19520	6.27217e-06	3.30013e-05	1.73691e-05	25977/1175/29924/8907/1212/8301/164/162/58513/1211/1173/160/161/163/1213	15
GO:0031970	CC	GO:0031970	organelle envelope lumen	23/1791	93/19520	8.08348e-06	4.22069e-05	2.22141e-05	57486/55750/54205/2628/1841/4702/56616/4976/204/847/824/9131/30968/7064/55749/10131/6472/4719/27101/6647/10989/11315/203068	23
GO:0000777	CC	GO:0000777	condensed chromosome kinetochore	25/1791	106/19520	8.22368e-06	4.26136e-05	2.24282e-05	25909/283489/348995/134492/9183/55746/81929/79902/10428/11258/23122/84295/23332/51143/23157/5905/7756/9793/8243/201161/9184/7158/4735/989/3192	25
GO:0005911	CC	GO:0005911	cell-cell junction	74/1791	485/19520	8.92125e-06	4.58807e-05	2.41477e-05	57669/1948/6801/5605/8642/57863/5586/10580/84687/2319/23114/421/6386/57216/5058/9223/199731/2885/8189/207/23705/5411/10211/5756/481/1982/8573/23580/9181/10152/7791/1525/120/6513/9124/7082/92140/10890/6904/1496/11151/5335/5962/10015/301/1656/5499/23136/1500/87/4301/9218/8826/387/118/10096/9948/25932/231/5062/7414/488/794/7094/302/1495/7533/79026/11315/1627/7317/6624/2316/71	74
GO:0033178	CC	GO:0033178	proton-transporting two-sector ATPase complex, catalytic domain	9/1791	18/19520	1.01951e-05	5.20405e-05	2.73897e-05	528/51606/529/523/526/509/539/498/506	9
GO:0098793	CC	GO:0098793	presynapse	74/1791	487/19520	1.03285e-05	5.23309e-05	2.75426e-05	1020/23413/84932/22848/6456/1948/23385/26052/5868/64780/9892/9513/4218/57465/8943/1212/28964/23191/112755/8301/80331/5869/8087/10211/382/10987/115207/1272/6616/8573/6857/23085/3092/8417/51138/1211/8618/23157/1785/23673/6513/10890/5764/708/2805/10059/6455/3673/6232/55964/6812/6717/9554/9522/11331/1488/8775/5499/1500/6712/5245/7417/2823/2239/7416/794/4735/821/10236/11315/7532/801/808/3312	74
GO:0032587	CC	GO:0032587	ruffle membrane	23/1791	95/19520	1.18e-05	5.93469e-05	3.12352e-05	57669/3685/84687/1729/55198/83543/5058/5756/23122/9181/1785/4646/378/3688/5879/23603/4830/23499/7094/6188/7430/1072/1915	23
GO:0005832	CC	GO:0005832	chaperonin-containing T-complex	7/1791	11/19520	1.28131e-05	6.35084e-05	3.34255e-05	22948/10574/10575/6950/7203/10576/10694	7
GO:0019774	CC	GO:0019774	proteasome core complex, beta-subunit complex	7/1791	11/19520	1.28131e-05	6.35084e-05	3.34255e-05	5690/5695/5694/5691/5692/5689/5693	7
GO:0098858	CC	GO:0098858	actin-based cell projection	40/1791	216/19520	1.33989e-05	6.59342e-05	3.47022e-05	1020/10006/60412/3685/84687/9513/23114/23191/57698/10160/8087/11344/529/5756/382/10788/10152/1267/51181/1525/3093/4646/55740/3688/523/526/160/5962/22902/25932/231/4478/2823/794/23224/2596/7430/10381/6624/4133	40
GO:0071782	CC	GO:0071782	endoplasmic reticulum tubular network	10/1791	23/19520	1.54112e-05	7.52946e-05	3.96287e-05	22930/444/80856/51062/7905/2010/10890/22931/3837/57142	10
GO:0044815	CC	GO:0044815	DNA packaging complex	26/1791	117/19520	1.70719e-05	8.28168e-05	4.35878e-05	84656/64151/9918/3024/10592/10051/3005/55506/50809/9555/8971/3009/8294/8359/8360/8361/8362/8363/8364/8365/8366/8367/8368/8370/121504/554313	26
GO:0000792	CC	GO:0000792	heterochromatin	19/1791	72/19520	1.81012e-05	8.71915e-05	4.58902e-05	115426/1788/3065/53615/546/1912/4204/29128/9031/1656/23468/11335/9555/8091/7155/6950/7317/10155/3009	19
GO:0002102	CC	GO:0002102	podosome	11/1791	28/19520	1.84972e-05	8.82737e-05	4.64598e-05	5782/285590/7082/6455/28988/2017/10097/9948/7414/6624/3190	11
GO:0000932	CC	GO:0000932	P-body	22/1791	91/19520	1.85839e-05	8.82737e-05	4.64598e-05	80153/4849/28960/5683/11157/51441/9698/7150/23644/5976/27258/23019/25804/7812/57819/5702/5685/1656/23589/5687/5701/4076	22
GO:0098562	CC	GO:0098562	cytoplasmic side of membrane	36/1791	191/19520	2.39134e-05	0.000112805	5.93711e-05	5605/5770/5868/84687/10672/56616/10160/23344/207/55847/2786/2539/9852/2773/23011/6616/3092/1917/3301/2035/6234/52/2778/2787/2280/6231/6155/5879/54331/8826/387/2775/2783/488/7430/1915	36
GO:0030894	CC	GO:0030894	replisome	10/1791	24/19520	2.42486e-05	0.000113603	5.9791e-05	10286/5356/5424/6119/988/6118/6117/27339/5111/4172	10
GO:0043025	CC	GO:0043025	neuronal cell body	71/1791	474/19520	2.51371e-05	0.000116964	6.15602e-05	1020/6456/26058/6801/10652/5868/8882/84687/9513/2931/4345/10013/4218/3065/4130/55201/23191/57698/8301/4035/8087/824/23154/6780/63826/5577/5792/3897/1917/7150/6993/6507/9939/10146/3337/5536/28988/51035/5594/10857/1996/10382/22902/25814/5499/6647/2806/6712/6240/4137/58155/2288/2317/2823/9775/11075/5048/1639/9590/10399/57142/2596/4926/3320/2664/4133/56896/2316/1400/4131/1152	71
GO:0071564	CC	GO:0071564	npBAF complex	7/1791	12/19520	2.83048e-05	0.000130814	6.88496e-05	6599/6605/6598/8289/6597/6601/86	7
GO:0005791	CC	GO:0005791	rough endoplasmic reticulum	19/1791	75/19520	3.37624e-05	0.00015499	8.15735e-05	6748/23480/4924/6780/10952/6128/6141/6234/51552/6228/6231/6155/6227/6185/6726/6184/6124/7317/5315	19
GO:0035861	CC	GO:0035861	site of double-strand break	18/1791	69/19520	3.53259e-05	0.000161086	8.47822e-05	25939/23376/23347/4361/10093/10094/10092/6119/10552/10109/10097/6118/1642/10096/7158/27339/142/7415	18
GO:0005769	CC	GO:0005769	early endosome	59/1791	378/19520	3.62187e-05	0.000164063	8.63492e-05	23325/388/129285/9482/89853/6456/57590/23385/26060/56850/5605/55697/5770/9114/5868/9135/112936/8027/25930/55198/29934/23646/4924/5604/81609/7251/7037/6643/8301/9559/5869/4035/10211/382/23011/51479/51699/9100/8417/9146/51160/23673/8724/6455/28988/3996/11151/51552/5594/5878/301/55737/10935/5245/55920/336/335/3329/3146	59
GO:0043596	CC	GO:0043596	nuclear replication fork	12/1791	35/19520	3.84937e-05	0.00017209	9.05735e-05	10286/5356/5424/9031/6119/988/8467/6118/6117/27339/5111/4172	12
GO:0090543	CC	GO:0090543	Flemming body	12/1791	35/19520	3.84937e-05	0.00017209	9.05735e-05	23265/55770/60412/283489/23636/7251/10659/382/9798/822/5898/10015	12
GO:0016469	CC	GO:0016469	proton-transporting two-sector ATPase complex	15/1791	52/19520	4.40067e-05	0.000194197	0.000102209	51382/9114/528/51606/529/10632/523/526/509/10476/522/539/515/498/506	15
GO:0030660	CC	GO:0030660	Golgi-associated vesicle membrane	15/1791	52/19520	4.40067e-05	0.000194197	0.000102209	11316/57410/1212/10959/22818/164/26958/22820/1211/372/160/9276/1315/1314/1213	15
GO:0005758	CC	GO:0005758	mitochondrial intermembrane space	20/1791	83/19520	4.61887e-05	0.00020252	0.000106589	57486/55750/54205/2628/1841/4702/56616/4976/204/847/824/9131/30968/7064/10131/6472/4719/6647/10989/11315	20
GO:0005657	CC	GO:0005657	replication fork	17/1791	65/19520	5.57972e-05	0.000242862	0.000127822	10286/5984/4361/5356/5982/5424/29128/9031/6119/988/8467/6118/6117/7158/27339/5111/4172	17
GO:0005875	CC	GO:0005875	microtubule associated complex	31/1791	161/19520	5.62003e-05	0.000242862	0.000127822	55860/10013/4130/55201/57698/11258/64837/8682/6780/10120/51143/2009/6993/140735/1783/51164/83658/1781/3799/8655/7175/10121/1641/10540/5048/1639/4134/4133/1778/7531/4131	31
GO:0005662	CC	GO:0005662	DNA replication factor A complex	7/1791	13/19520	5.64548e-05	0.000242862	0.000127822	10286/5356/6119/988/6118/6117/27339	7
GO:0015030	CC	GO:0015030	Cajal body	19/1791	78/19520	6.05141e-05	0.000258698	0.000136157	8882/9129/55651/26121/1736/2091/9128/6631/9092/10285/51602/11325/9879/7307/9733/23524/9343/7514/3181	19
GO:0030136	CC	GO:0030136	clathrin-coated vesicle	35/1791	192/19520	6.31487e-05	0.000268284	0.000141202	25977/55681/22848/6456/1175/5868/29924/9892/10972/4218/8907/1212/950/7037/8301/80331/4035/10134/6857/3092/164/162/1211/1785/4646/8724/1173/28988/160/161/51552/9522/163/1213/3312	35
GO:0031965	CC	GO:0031965	nuclear membrane	48/1791	295/19520	6.63124e-05	0.000279986	0.000147361	25909/10269/9330/25777/1717/9589/221496/23165/6386/23236/23636/55746/5058/79902/79188/5356/4521/22929/9631/10204/23225/3930/327/4646/3840/2010/92140/5905/9688/1104/10434/51495/6434/10128/7175/201161/9218/7514/51155/9805/11335/5048/1192/84823/23224/3837/9782/4001	48
GO:0043601	CC	GO:0043601	nuclear replisome	9/1791	22/19520	7.42664e-05	0.000311646	0.000164024	10286/5356/5424/6119/988/6118/6117/27339/4172	9
GO:0005884	CC	GO:0005884	actin filament	24/1791	113/19520	7.66378e-05	0.000319636	0.000168229	57175/83543/5058/11344/5756/10094/4646/9124/28988/11151/23406/2017/10787/301/5879/87/8826/7170/7171/7430/1627/1809/2316/71	24
GO:0005912	CC	GO:0005912	adherens junction	32/1791	172/19520	8.56259e-05	0.000354958	0.00018682	57669/1948/8642/10580/84687/2319/421/6386/9223/10211/1982/23580/10152/7791/1525/9124/7082/10890/6904/1496/5962/301/1656/5499/1500/4301/118/7414/7094/302/1495/11315	32
GO:0030122	CC	GO:0030122	AP-2 adaptor complex	6/1791	10/19520	8.97747e-05	0.000369915	0.000194692	1175/8301/1173/160/161/163	6
GO:0030139	CC	GO:0030139	endocytic vesicle	49/1791	307/19520	9.16094e-05	0.000375215	0.000197481	9482/6456/26060/1175/9114/5868/9135/3685/2319/112936/4218/55198/1212/950/8301/5869/4035/382/8417/23580/1211/7791/1785/23673/4646/10890/8724/1173/5898/6812/11151/160/161/9554/51552/5878/10525/3799/7879/163/10808/2923/7184/335/3320/811/1213/6233/7431	49
GO:0005847	CC	GO:0005847	mRNA cleavage and polyadenylation specificity factor complex	8/1791	18/19520	9.32817e-05	0.00037979	0.000199889	29894/79869/8189/51692/81608/1478/11052/11051	8
GO:0017053	CC	GO:0017053	transcription repressor complex	18/1791	74/19520	9.56403e-05	0.000387089	0.000203731	1107/3065/53615/5931/25942/79718/1457/9112/1487/9219/1488/3005/3066/3068/23468/5928/7529/3146	18
GO:0045239	CC	GO:0045239	tricarboxylic acid cycle enzyme complex	7/1791	14/19520	0.000103952	0.000416068	0.000218983	8801/1743/8802/4967/1738/8803/2271	7
GO:0031968	CC	GO:0031968	organelle outer membrane	38/1791	220/19520	0.000104017	0.000416068	0.000218983	51100/55750/10651/1717/51024/57506/25813/1528/23098/54332/581/10452/493856/56993/4976/55847/80777/10204/3032/1267/2010/10059/1727/54927/10493/9868/7419/10857/10128/11331/5245/10989/4830/7417/7416/23224/3313/6233	38
GO:0044295	CC	GO:0044295	axonal growth cone	10/1791	28/19520	0.000115238	0.00045827	0.000241195	23191/57698/4035/3897/6993/3799/2288/2823/3320/2316	10
GO:0019867	CC	GO:0019867	outer membrane	38/1791	222/19520	0.000126406	0.000499778	0.000263041	51100/55750/10651/1717/51024/57506/25813/1528/23098/54332/581/10452/493856/56993/4976/55847/80777/10204/3032/1267/2010/10059/1727/54927/10493/9868/7419/10857/10128/11331/5245/10989/4830/7417/7416/23224/3313/6233	38
GO:0034708	CC	GO:0034708	methyltransferase complex	21/1791	96/19520	0.000135466	0.000531557	0.000279767	9589/26121/6635/8731/80335/27043/5931/6637/79084/6636/10419/6634/6632/8607/10856/3066/23468/2079/6633/3276/5928	21
GO:0030665	CC	GO:0030665	clathrin-coated vesicle membrane	24/1791	117/19520	0.000135998	0.000531557	0.000279767	25977/6456/1175/5868/29924/8907/1212/950/7037/8301/80331/6857/3092/164/162/1211/4646/1173/28988/160/161/163/1213/3312	24
GO:0034719	CC	GO:0034719	SMN-Sm protein complex	8/1791	19/19520	0.000148184	0.000575896	0.000303103	6635/6637/25929/6636/6634/6632/11171/6633	8
GO:0030131	CC	GO:0030131	clathrin adaptor complex	9/1791	24/19520	0.000164814	0.000636908	0.000335215	1175/8907/8301/164/162/1173/160/161/163	9
GO:0005688	CC	GO:0005688	U6 snRNP	6/1791	11/19520	0.000182129	0.000695955	0.000366292	11157/51691/27258/25804/57819/7919	6
GO:0030128	CC	GO:0030128	clathrin coat of endocytic vesicle	6/1791	11/19520	0.000182129	0.000695955	0.000366292	1175/8301/1173/160/161/163	6
GO:0099738	CC	GO:0099738	cell cortex region	12/1791	41/19520	0.000216762	0.000823695	0.000433524	1212/23122/23085/23332/2037/1211/2035/1488/1500/10121/1639/4926	12
GO:0000145	CC	GO:0000145	exocyst	8/1791	20/19520	0.000227164	0.000858454	0.000451818	23265/149371/23233/55770/10640/60412/10890/4735	8
GO:0005777	CC	GO:0005777	peroxisome	26/1791	136/19520	0.000242846	0.000907686	0.00047773	51/5605/10455/30/51024/5825/57506/51015/6342/8540/847/224/10654/1891/3295/9380/10059/3422/6647/3615/25824/375/3417/3418/7086/7431	26
GO:0042579	CC	GO:0042579	microbody	26/1791	136/19520	0.000242846	0.000907686	0.00047773	51/5605/10455/30/51024/5825/57506/51015/6342/8540/847/224/10654/1891/3295/9380/10059/3422/6647/3615/25824/375/3417/3418/7086/7431	26
GO:0005774	CC	GO:0005774	vacuolar membrane	62/1791	431/19520	0.000251661	0.000935524	0.000492381	408/51382/28956/51100/9482/23385/6836/1175/55697/9114/528/79888/8907/23646/63908/51606/81929/8943/950/80331/4035/6009/9043/529/10211/2773/51479/1917/8417/164/81631/162/1211/4646/1173/6396/5660/4905/523/6520/526/160/161/51552/5878/1509/8775/55737/5862/6185/9218/2783/7879/163/302/309/7529/79026/1213/7317/1915/3312	62
GO:0070069	CC	GO:0070069	cytochrome complex	11/1791	36/19520	0.000259924	0.000961017	0.000505799	27089/1537/9377/4697/1340/7381/4513/7386/1327/7384/7385	11
GO:0005793	CC	GO:0005793	endoplasmic reticulum-Golgi intermediate compartment	25/1791	130/19520	0.0002883	0.0010602	0.000557999	6836/10652/57410/57222/10972/399687/23071/4924/10134/9798/10959/26958/22820/81876/56886/9554/1315/5862/871/10130/5034/2335/811/3309/3146	25
GO:0036020	CC	GO:0036020	endolysosome membrane	7/1791	16/19520	0.000293823	0.00107473	0.000565649	1175/1211/1173/160/161/163/1213	7
GO:0016234	CC	GO:0016234	inclusion body	17/1791	74/19520	0.000309836	0.00112131	0.000590164	178/10013/2876/10482/8301/5424/22803/29979/1191/5905/5704/5705/7175/4137/1938/3303/3304	17
GO:0042641	CC	GO:0042641	actomyosin	17/1791	74/19520	0.000309836	0.00112131	0.000590164	57175/3611/10580/399687/7791/9124/51164/10015/87/7170/10801/989/55752/81/7171/1627/6624	17
GO:0000786	CC	GO:0000786	nucleosome	22/1791	109/19520	0.000322847	0.00116225	0.00061171	84656/3024/3005/55506/50809/9555/8971/3009/8294/8359/8360/8361/8362/8363/8364/8365/8366/8367/8368/8370/121504/554313	22
GO:0019897	CC	GO:0019897	extrinsic component of plasma membrane	30/1791	169/19520	0.000328694	0.0011771	0.000619528	22848/8642/9892/10672/10160/23344/8301/207/2786/2773/6616/3092/30968/1496/2778/3838/2787/1399/301/5879/1500/5245/54331/8826/387/2775/2783/488/1495/4926	30
GO:0008023	CC	GO:0008023	transcription elongation factor complex	14/1791	56/19520	0.000411602	0.00145383	0.000765172	7469/79577/54623/25920/51497/22938/6830/23168/80349/6829/6923/6921/6749/11198	14
GO:0005765	CC	GO:0005765	lysosomal membrane	55/1791	378/19520	0.000412343	0.00145383	0.000765172	408/51382/28956/9482/23385/6836/1175/9114/528/79888/8907/23646/51606/81929/8943/950/80331/4035/6009/9043/529/10211/2773/51479/1917/8417/164/162/1211/4646/1173/6396/5660/4905/523/6520/526/160/161/51552/5878/1509/55737/5862/9218/2783/7879/163/302/309/79026/1213/7317/1915/3312	55
GO:0098852	CC	GO:0098852	lytic vacuole membrane	55/1791	378/19520	0.000412343	0.00145383	0.000765172	408/51382/28956/9482/23385/6836/1175/9114/528/79888/8907/23646/51606/81929/8943/950/80331/4035/6009/9043/529/10211/2773/51479/1917/8417/164/162/1211/4646/1173/6396/5660/4905/523/6520/526/160/161/51552/5878/1509/55737/5862/9218/2783/7879/163/302/309/79026/1213/7317/1915/3312	55
GO:0005741	CC	GO:0005741	mitochondrial outer membrane	33/1791	195/19520	0.000420741	0.00147583	0.000776752	51100/55750/10651/51024/57506/25813/1528/23098/54332/581/10452/493856/56993/4976/55847/80777/3032/1267/10059/1727/54927/10493/9868/7419/10857/11331/5245/10989/4830/7417/7416/3313/6233	33
GO:0005753	CC	GO:0005753	mitochondrial proton-transporting ATP synthase complex	8/1791	22/19520	0.000488017	0.00169443	0.000891807	10632/509/10476/522/539/515/498/506	8
GO:0005849	CC	GO:0005849	mRNA cleavage factor complex	8/1791	22/19520	0.000488017	0.00169443	0.000891807	29894/79869/8189/51692/81608/1478/11052/11051	8
GO:0008287	CC	GO:0008287	protein serine/threonine phosphatase complex	13/1791	51/19520	0.000536036	0.00184246	0.000969714	54205/5532/5524/84687/5531/80335/5529/151987/4659/5500/5515/5499/5518	13
GO:1903293	CC	GO:1903293	phosphatase complex	13/1791	51/19520	0.000536036	0.00184246	0.000969714	54205/5532/5524/84687/5531/80335/5529/151987/4659/5500/5515/5499/5518	13
GO:0016281	CC	GO:0016281	eukaryotic translation initiation factor 4F complex	6/1791	13/19520	0.000575522	0.00196828	0.00103594	1982/1974/7458/1975/1981/1973	6
GO:0030016	CC	GO:0030016	myofibril	36/1791	224/19520	0.000647097	0.00220206	0.00115898	5532/3611/6138/5058/1465/1073/8087/11344/5756/29767/4659/6513/9124/51164/10539/1466/6717/800/2280/87/23603/5687/7170/2317/832/7414/375/23224/79026/7171/6711/226/2316/801/805/808	36
GO:0032153	CC	GO:0032153	cell division site	16/1791	72/19520	0.000681582	0.00230793	0.0012147	388/79187/5586/11258/382/23011/23157/5898/55964/3688/5962/387/10801/4735/989/55752	16
GO:0045259	CC	GO:0045259	proton-transporting ATP synthase complex	8/1791	23/19520	0.000688505	0.00230852	0.00121501	10632/509/10476/522/539/515/498/506	8
GO:0098799	CC	GO:0098799	outer mitochondrial membrane protein complex	8/1791	23/19520	0.000688505	0.00230852	0.00121501	10651/25813/10452/56993/54927/9868/10989/3313	8
GO:0031143	CC	GO:0031143	pseudopodium	7/1791	18/19520	0.00069345	0.00231375	0.00121777	408/824/1267/5594/87/4478/81	7
GO:0032432	CC	GO:0032432	actin filament bundle	16/1791	73/19520	0.000799744	0.00265546	0.00139761	57175/3611/10580/7791/9124/51164/87/7170/10801/989/55752/81/7171/6624/2316/4082	16
GO:0000346	CC	GO:0000346	transcription export complex	6/1791	14/19520	0.000929198	0.00299798	0.00157788	57187/10482/26097/10189/84324/7919	6
GO:0005750	CC	GO:0005750	mitochondrial respiratory chain complex III	6/1791	14/19520	0.000929198	0.00299798	0.00157788	27089/1537/7381/7386/7384/7385	6
GO:0005940	CC	GO:0005940	septin ring	6/1791	14/19520	0.000929198	0.00299798	0.00157788	23157/55964/10801/4735/989/55752	6
GO:0031105	CC	GO:0031105	septin complex	6/1791	14/19520	0.000929198	0.00299798	0.00157788	23157/55964/10801/4735/989/55752	6
GO:0032156	CC	GO:0032156	septin cytoskeleton	6/1791	14/19520	0.000929198	0.00299798	0.00157788	23157/55964/10801/4735/989/55752	6
GO:0045275	CC	GO:0045275	respiratory chain complex III	6/1791	14/19520	0.000929198	0.00299798	0.00157788	27089/1537/7381/7386/7384/7385	6
GO:0036019	CC	GO:0036019	endolysosome	8/1791	24/19520	0.00095035	0.00305183	0.00160623	1175/1508/1211/1173/160/161/163/1213	8
GO:0030286	CC	GO:0030286	dynein complex	13/1791	54/19520	0.000962252	0.0030613	0.00161121	10013/51143/6993/140735/1783/51164/83658/1781/8655/7175/10540/1639/1778	13
GO:0032154	CC	GO:0032154	cleavage furrow	13/1791	54/19520	0.000962252	0.0030613	0.00161121	388/79187/5586/11258/382/23011/23157/5898/3688/5962/387/4735/989	13
GO:0016514	CC	GO:0016514	SWI/SNF complex	7/1791	19/19520	0.00101152	0.00320315	0.00168587	6599/6605/6598/8289/6597/6601/86	7
GO:0005732	CC	GO:0005732	sno(s)RNA-containing ribonucleoprotein complex	9/1791	30/19520	0.00108778	0.00342877	0.00180462	55651/1736/11157/2091/51602/6636/9410/4809/10528	9
GO:0071162	CC	GO:0071162	CMG complex	5/1791	10/19520	0.00109863	0.00344709	0.00181426	4174/4176/4175/4172/4171	5
GO:0043292	CC	GO:0043292	contractile fiber	36/1791	231/19520	0.00114543	0.00357751	0.0018829	5532/3611/6138/5058/1465/1073/8087/11344/5756/29767/4659/6513/9124/51164/10539/1466/6717/800/2280/87/23603/5687/7170/2317/832/7414/375/23224/79026/7171/6711/226/2316/801/805/808	36
GO:1904724	CC	GO:1904724	tertiary granule lumen	13/1791	55/19520	0.00115585	0.00359364	0.00189139	8836/23191/2495/56954/4048/28988/230/1509/1476/5236/3417/3608/226	13
GO:0099568	CC	GO:0099568	cytoplasmic region	39/1791	258/19520	0.00131734	0.0040772	0.00214589	55860/4130/8943/1212/4976/23122/23011/5576/23085/23332/2037/5573/81631/1211/5905/2035/5594/10382/1488/6647/1500/3799/8655/4137/10121/10801/231/1641/5048/1639/4735/4134/989/3315/6421/4926/4133/1778/3192	39
GO:0071565	CC	GO:0071565	nBAF complex	6/1791	15/19520	0.00142902	0.00438317	0.00230693	6599/6605/6598/8289/6597/6601	6
GO:0098554	CC	GO:0098554	cytoplasmic side of endoplasmic reticulum membrane	6/1791	15/19520	0.00142902	0.00438317	0.00230693	5770/9852/3301/6234/6231/6155	6
GO:0001725	CC	GO:0001725	stress fiber	14/1791	64/19520	0.00169434	0.00515079	0.00271094	57175/3611/10580/7791/9124/51164/87/7170/10801/989/55752/81/7171/6624	14
GO:0097517	CC	GO:0097517	contractile actin filament bundle	14/1791	64/19520	0.00169434	0.00515079	0.00271094	57175/3611/10580/7791/9124/51164/87/7170/10801/989/55752/81/7171/6624	14
GO:0005876	CC	GO:0005876	spindle microtubule	15/1791	71/19520	0.00170594	0.00515263	0.00271191	22924/9183/7283/23122/23332/8452/403/22919/5048/4926/1213/3192/801/805/808	15
GO:0030867	CC	GO:0030867	rough endoplasmic reticulum membrane	8/1791	26/19520	0.00171001	0.00515263	0.00271191	6748/23480/10952/6234/6231/6155/6726/7317	8
GO:0045121	CC	GO:0045121	membrane raft	46/1791	323/19520	0.00182325	0.00543376	0.00285987	867/28956/5868/10580/2319/10013/6386/79180/824/10211/2773/481/1272/5577/5576/5573/1398/483/30968/1525/23673/11160/6513/119/3688/1947/5594/682/1509/5515/23603/8826/4137/2817/292/7416/871/302/1495/79026/11315/7430/1938/5230/3945/203068	46
GO:0098857	CC	GO:0098857	membrane microdomain	46/1791	323/19520	0.00182325	0.00543376	0.00285987	867/28956/5868/10580/2319/10013/6386/79180/824/10211/2773/481/1272/5577/5576/5573/1398/483/30968/1525/23673/11160/6513/119/3688/1947/5594/682/1509/5515/23603/8826/4137/2817/292/7416/871/302/1495/79026/11315/7430/1938/5230/3945/203068	46
GO:0001650	CC	GO:0001650	fibrillar center	24/1791	139/19520	0.00182955	0.00543376	0.00285987	1736/8731/10469/2091/5356/8480/7296/7150/51602/6598/9879/5049/92140/4781/6629/7343/10528/8615/8467/55269/7334/1936/7430/4841	24
GO:0005782	CC	GO:0005782	peroxisomal matrix	12/1791	51/19520	0.00184303	0.00543376	0.00285987	51/10455/30/5825/6342/8540/847/1891/3295/9380/25824/3417	12
GO:0031907	CC	GO:0031907	microbody lumen	12/1791	51/19520	0.00184303	0.00543376	0.00285987	51/10455/30/5825/6342/8540/847/1891/3295/9380/25824/3417	12
GO:0000276	CC	GO:0000276	mitochondrial proton-transporting ATP synthase complex, coupling factor F(o)	5/1791	11/19520	0.00186239	0.00546727	0.00287751	10632/10476/522/539/515	5
GO:0120111	CC	GO:0120111	neuron projection cytoplasm	17/1791	86/19520	0.00187433	0.00547882	0.00288359	55860/4130/8943/4976/23011/5905/5594/6647/3799/8655/4137/5048/3315/6421/4133/1778/3192	17
GO:1904115	CC	GO:1904115	axon cytoplasm	13/1791	58/19520	0.00194055	0.00564825	0.00297276	55860/4130/8943/4976/23011/5905/6647/3799/8655/4137/5048/3315/1778	13
GO:0005869	CC	GO:0005869	dynactin complex	6/1791	16/19520	0.00211013	0.00611581	0.00321885	55860/11258/10120/51164/10121/10540	6
GO:0031256	CC	GO:0031256	leading edge membrane	28/1791	173/19520	0.00219433	0.00633299	0.00333315	57669/3685/84687/1729/55198/83543/5058/5756/23122/9181/1785/4646/378/3688/10787/5879/23136/23603/4137/4830/23499/7094/23224/6188/6711/7430/1072/1915	28
GO:0005811	CC	GO:0005811	lipid droplet	18/1791	95/19520	0.00229805	0.00660448	0.00347604	22930/79888/51097/23197/50814/9183/10134/4047/10226/1727/22931/5878/7879/5947/6418/27339/302/7415	18
[truncated: 307 more rows]

## Sheet: S2.DEPs
ID	11-9_PValue	13-11_PValue	13-9_PValue	11-9_AdjPVal	13-11_AdjPVal	13-9_AdjPVal	11-9_log2FoldChange	13-11_log2FoldChange	13-9_log2FoldChange	featureAvg	GW9L	GW9R	GW11L	GW11R	GW13L	GW13R
[truncated: 1,793 more rows]

[truncated: 21 more sheets: S3.coreDEPs, S4.11-9neurogenesisDEPs, S5.13-11neurogenesisDEPs, S6.11-9DEPsGO, S7.13-11DEPsGO, S8.13-9DEPsGO, S9.left only proteins, S10.right only proteins, S11.2FC, S12.1.5FC, S13.1.5FC-annotation, S14.9AEPsGO, S15.11AEPsGO, S16.13AEPsGO, S17.L2-functional annotation, S18.9GWproteinGroups, S19.11GWproteinGroups, S20.13GWproteinGroups, S21.9GW-AEPs, S22.11GW-AEPs …]
